# Supplementary material
Source: ML conference proceedings conference paper supplement (https://openreview.net/forum?id=7QjQ1mpNMX)
Supplement: supplementary_material [file supplementary_materials.pdf › supplementary_materials.pdf]

# LARGE PRETRAINING DATASETS DON'T ALWAYS GUARANTEE ROBUSTNESS AFTER FINE-TUNING

## *Supplementary Materials*

**Anonymous authors**

Paper under double-blind review

## 1 ANALYSIS OF REPRESENTATION SHIFT VIA CENTERED KERNEL ALIGNMENT (CKA)

As shown in Figures S1–S8, models pretrained on LAION and OpenAI datasets generally exhibit lower CKA values compared to the other models. However, the gap between these two groups is relatively small when ImageNet-C is used for fine-tuning dataset. In any fine-tuning and evaluation dataset pair, sixth transformer’s mlp.fc2 exhibits significant drop.

Table 1: Reference for the Figures regarding Centered Kernel Alignment.

| Fine-Tuning Dataset | Figure Index |
|---------------------|--------------|
| ImageNet-V2         | Figure S1    |
| ImageNet-A          | Figure S2    |
| ImageNet-R          | Figure S3    |
| ImageNet-Sketch     | Figure S4    |
| ObjectNet           | Figure S5    |
| ImageNet-Cartoon    | Figure S6    |
| ImageNet-Drawing    | Figure S7    |
| ImageNet-C          | Figure S8    |

## 2 ACCURACY OF USING VARIOUS PRE-TRAINED MODELS ON EACH OOD DATASETS AND EACH CORRUPTION IN IMAGENET-C

Table 2 summarizes the Table indices for the accuracy on each OOD (out-of-distribution) dataset (Table S1 and Tables S2-S17) and ImageNet-C (Tables S18-S35) after fine-tuning on various datasets. Each pre-trained and fine-tuned model is evaluated on ImageNet-C with 15 corruptions at severity levels ranging from 1 to 5. Following the original ImageNet-C benchmark Hendrycks & Dietterich (2019), we average the performance over the different severity levels. However, for consistency with other datasets, we report the results as accuracy rather than error.

Table 2: Reference for the tables showing accuracy of pre-trained models on OOD datasets (left) and ImageNet-C corruptions (right).

| Architecture | $D_{\text{pre}}$ | Accuracy on OOD datasets | Accuracy on ImageNet-C |
|--------------|------------------|--------------------------|------------------------|
| ViT-B/16     | IN-1K + AugReg   | Table S1                 | Table S18              |
|              | IN-1K + SAM      | Table S2                 | Table S19              |
|              | IN-21K           | Table S3                 | Table S20              |
|              | IN-21K-P         | Table S4                 | Table S21              |
|              | IN-21K + AugReg  | Table S5                 | Table S22              |
|              | LAION-2B         | Table S6                 | Table S23              |
|              | OpenAI           | Table S7                 | Table S24              |
| ViT-B/32     | IN-1K + AugReg   | Table S8                 | Table S25              |
|              | IN-21K + AugReg  | Table S9                 | Table S27              |
|              | LAION-2B         | Table S10                | Table S28              |
|              | OpenAI           | Table S11                | Table S29              |
| ViT-S/16     | IN-1K + AugReg   | Table S12                | Table S30              |
|              | IN-21K + AugReg  | Table S13                | Table S31              |
| ViT-S/32     | IN-21K + AugReg  | Table S14                | Table S32              |
| ViT-L/16     | IN-21K + AugReg  | Table S15                | Table S33              |
| ResNet-18    | IN-1K            | Table S16                | Table S34              |
| ResNet-50    | IN-1K            | Table S17                | Table S35              |

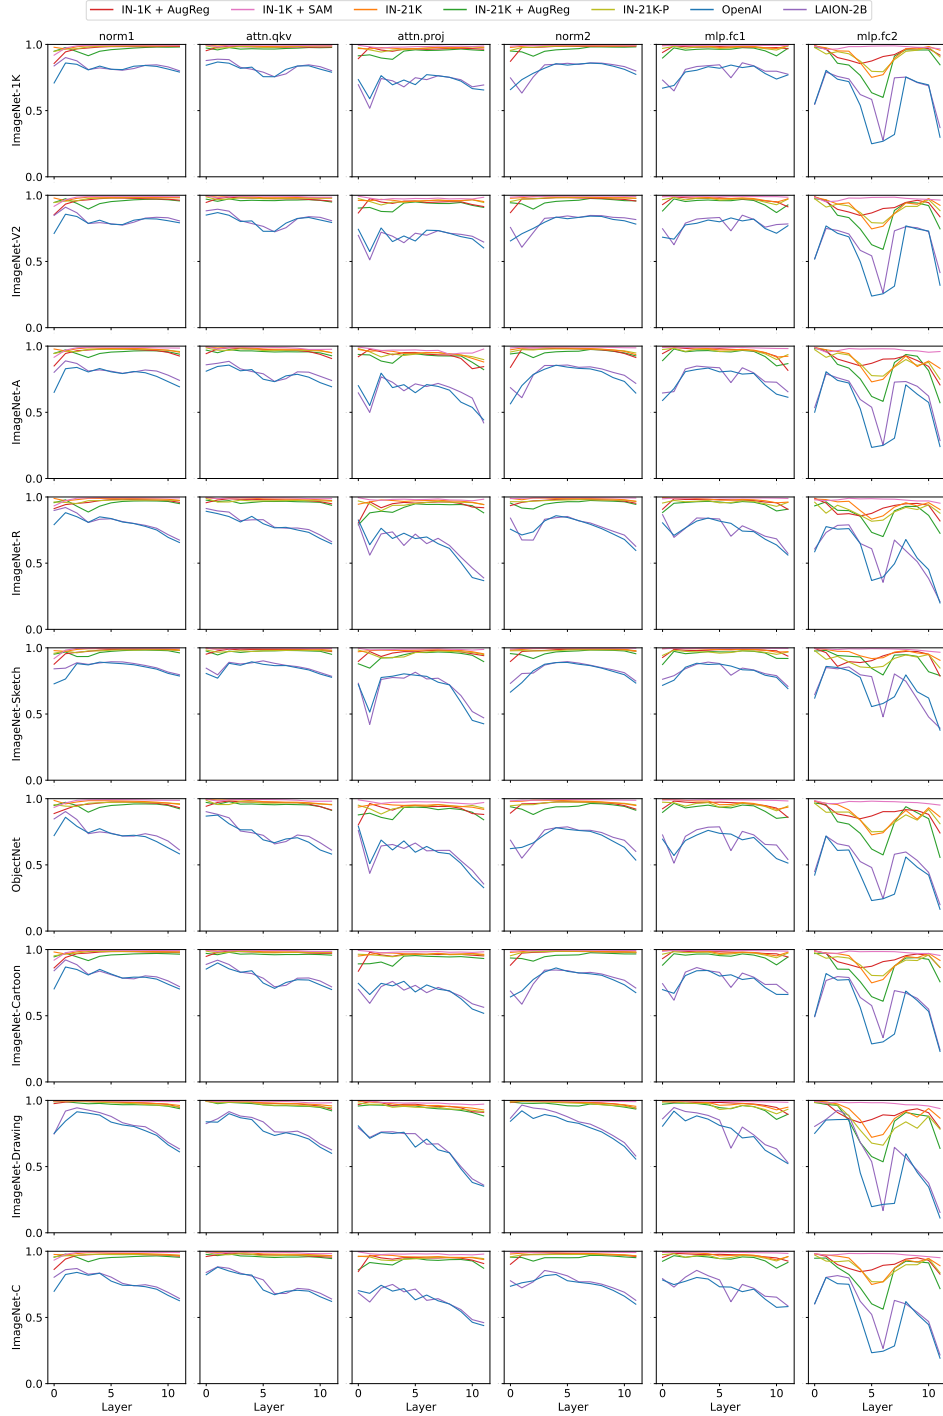

Figure S1: **Representational shifts from fine-tuning on ImageNet-V2, analyzed by Centered Kernel Alignment (CKA), in ViT-B/16 models pretrained on various datasets.** Rows indicate datasets where CKA is measured, and column indicates different parts of the transformer demonstrated in Figure 9 in the main paper. Models pretrained on OpenAI and LAION-2B show distinct CKA patterns across layers compared to others.

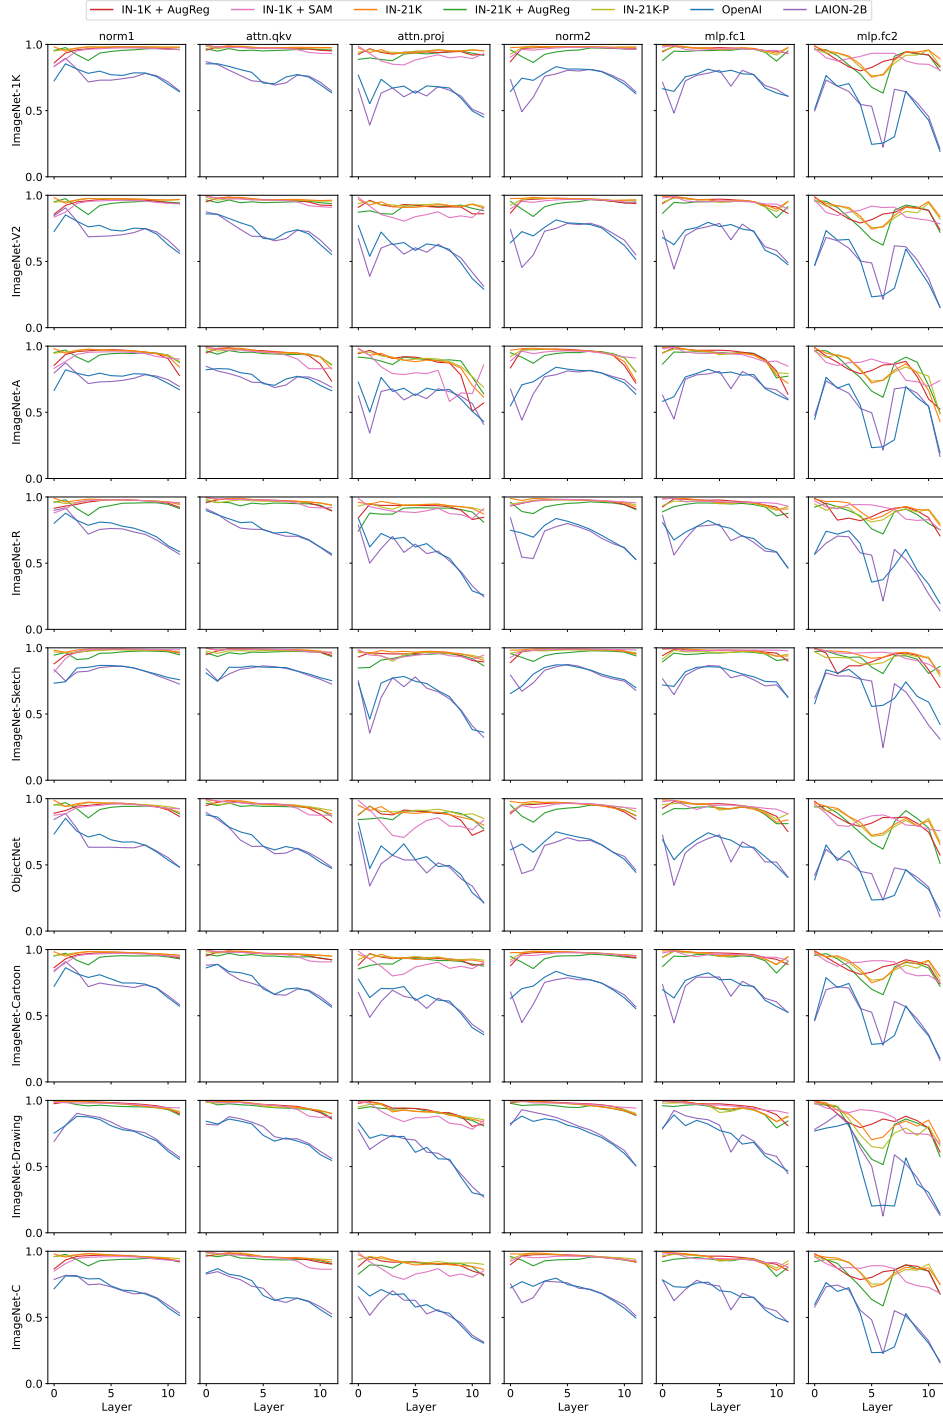

Figure S2: **Representational shifts from fine-tuning on ImageNet-A, analyzed by Centered Kernel Alignment (CKA), in ViT-B/16 models pretrained on various datasets.** Rows indicate datasets where CKA is measured, and column indicates different parts of the transformer demonstrated in Figure 9 in the main paper. Models pretrained on OpenAI and LAION-2B show distinct CKA patterns across layers compared to others.

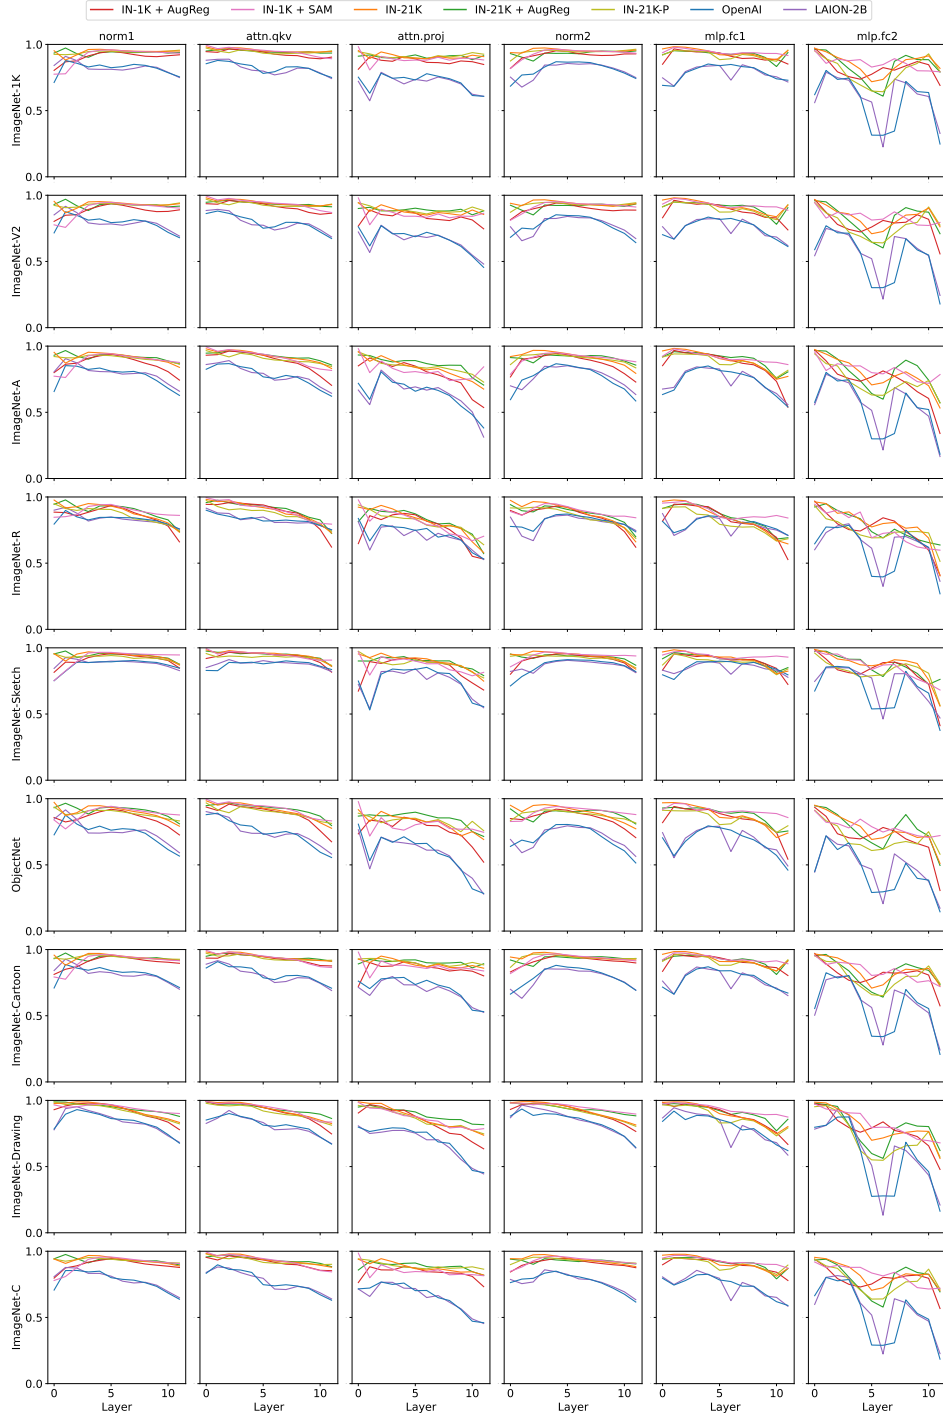

Figure S3: **Representational shifts from fine-tuning on ImageNet-R, analyzed by Centered Kernel Alignment (CKA), in ViT-B/16 models pretrained on various datasets.** Rows indicate datasets where CKA is measured, and column indicates different parts of the transformer demonstrated in Figure 9 in the main paper. Models pretrained on OpenAI and LAION-2B show distinct CKA patterns across layers compared to others.

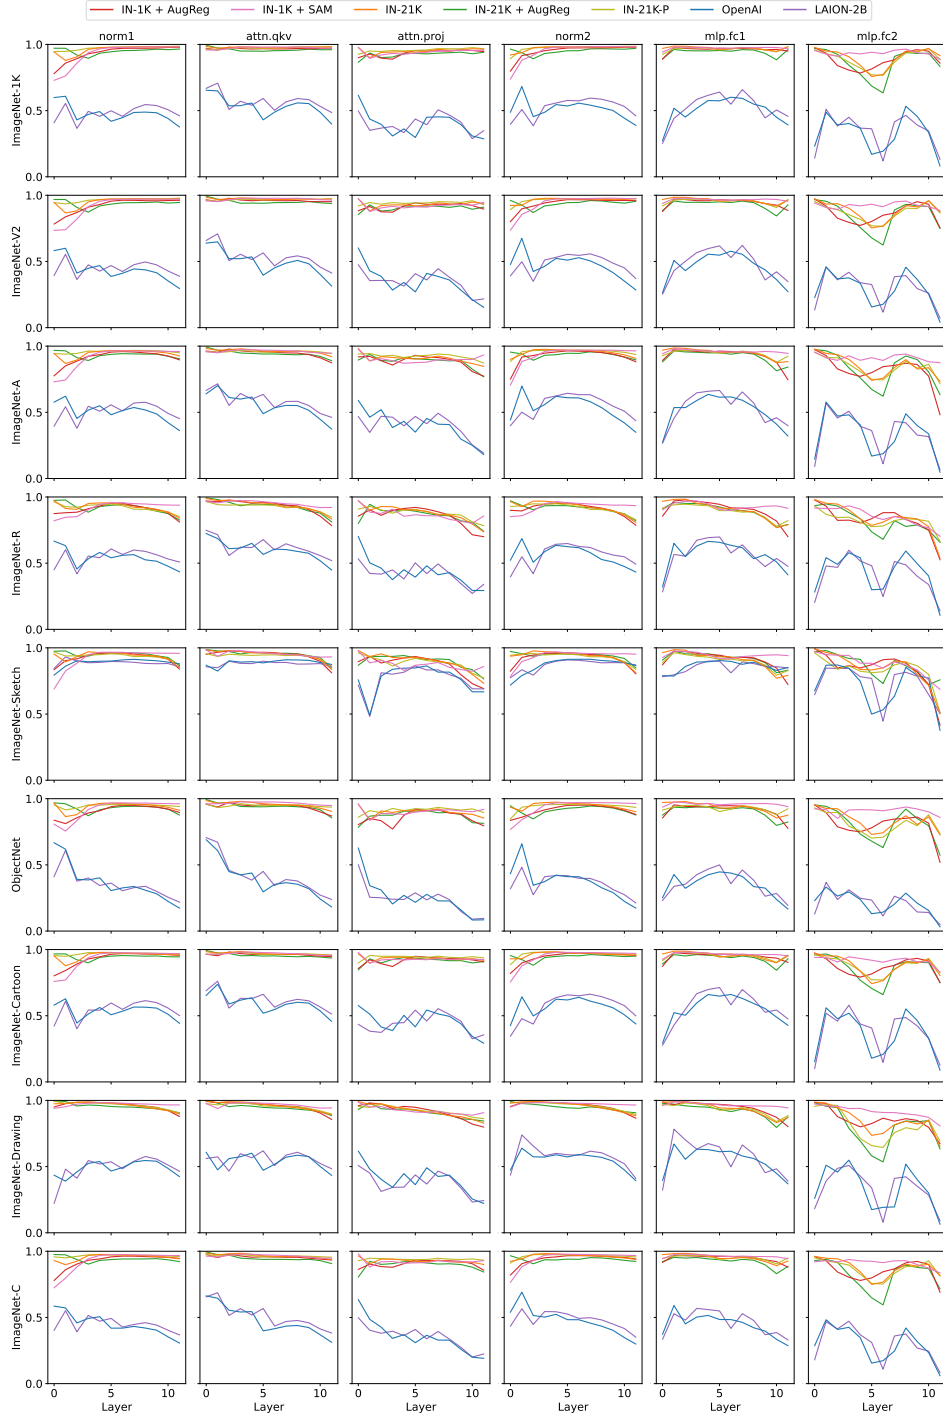

**Figure S4: Representational shifts from fine-tuning on ImageNet-Sketch, analyzed by Centered Kernel Alignment (CKA), in ViT-B/16 models pretrained on various datasets.** Rows indicate datasets where CKA is measured, and column indicates different parts of the transformer demonstrated in Figure 9 in the main paper. Models pretrained on OpenAI and LAION-2B show distinct CKA patterns across layers compared to others.

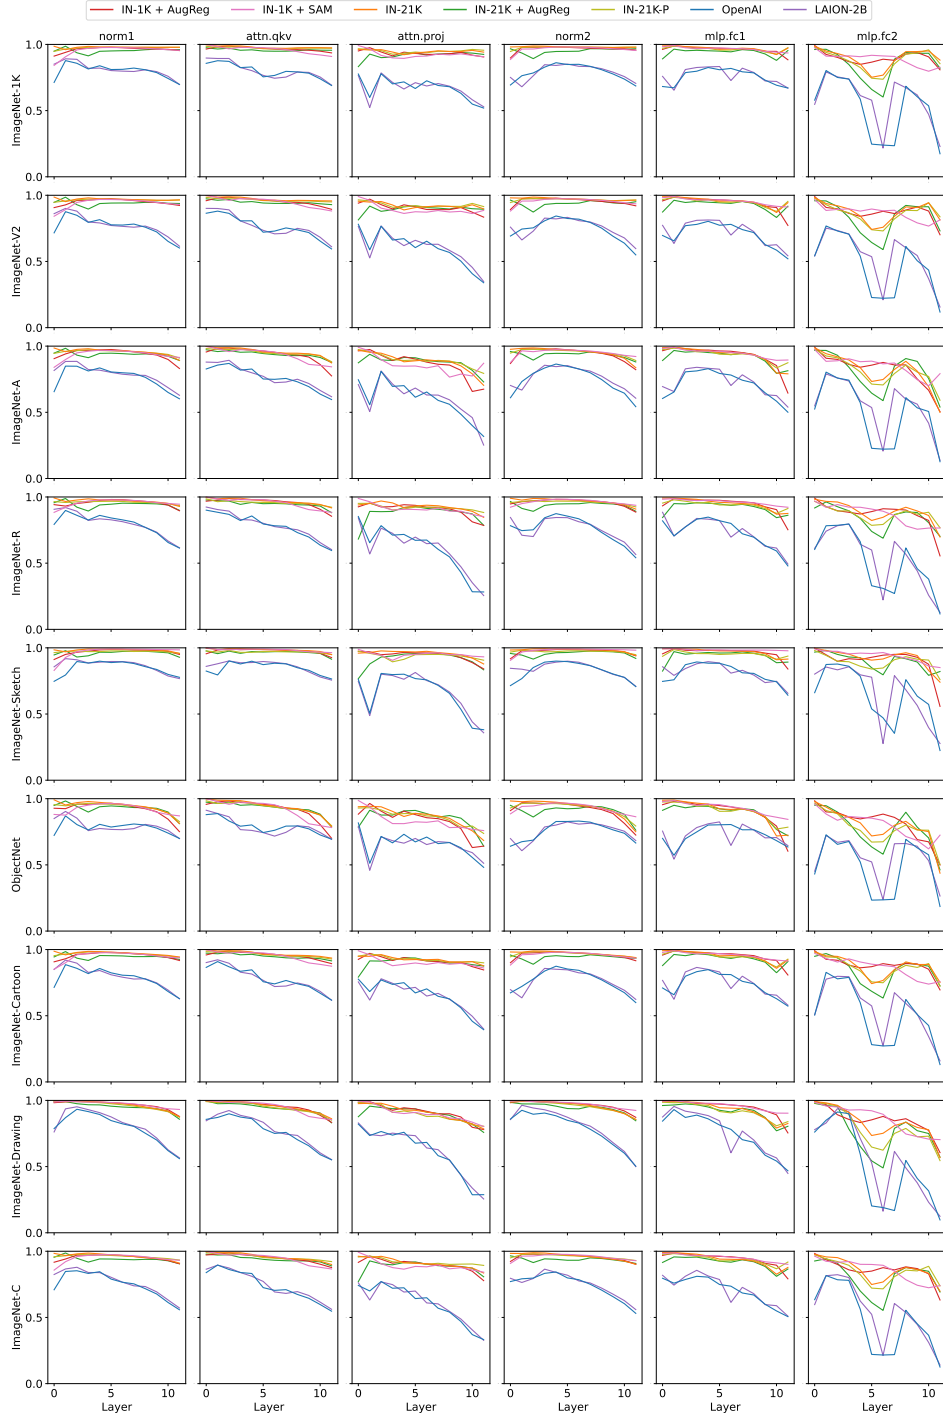

Figure S5: **Representational shifts from fine-tuning on ObjectNet, analyzed by Centered Kernel Alignment (CKA), in ViT-B/16 models pretrained on various datasets.** Rows indicate datasets where CKA is measured, and column indicates different parts of the transformer demonstrated in Figure 9 in the main paper. Models pretrained on OpenAI and LAION-2B show distinct CKA patterns across layers compared to others.

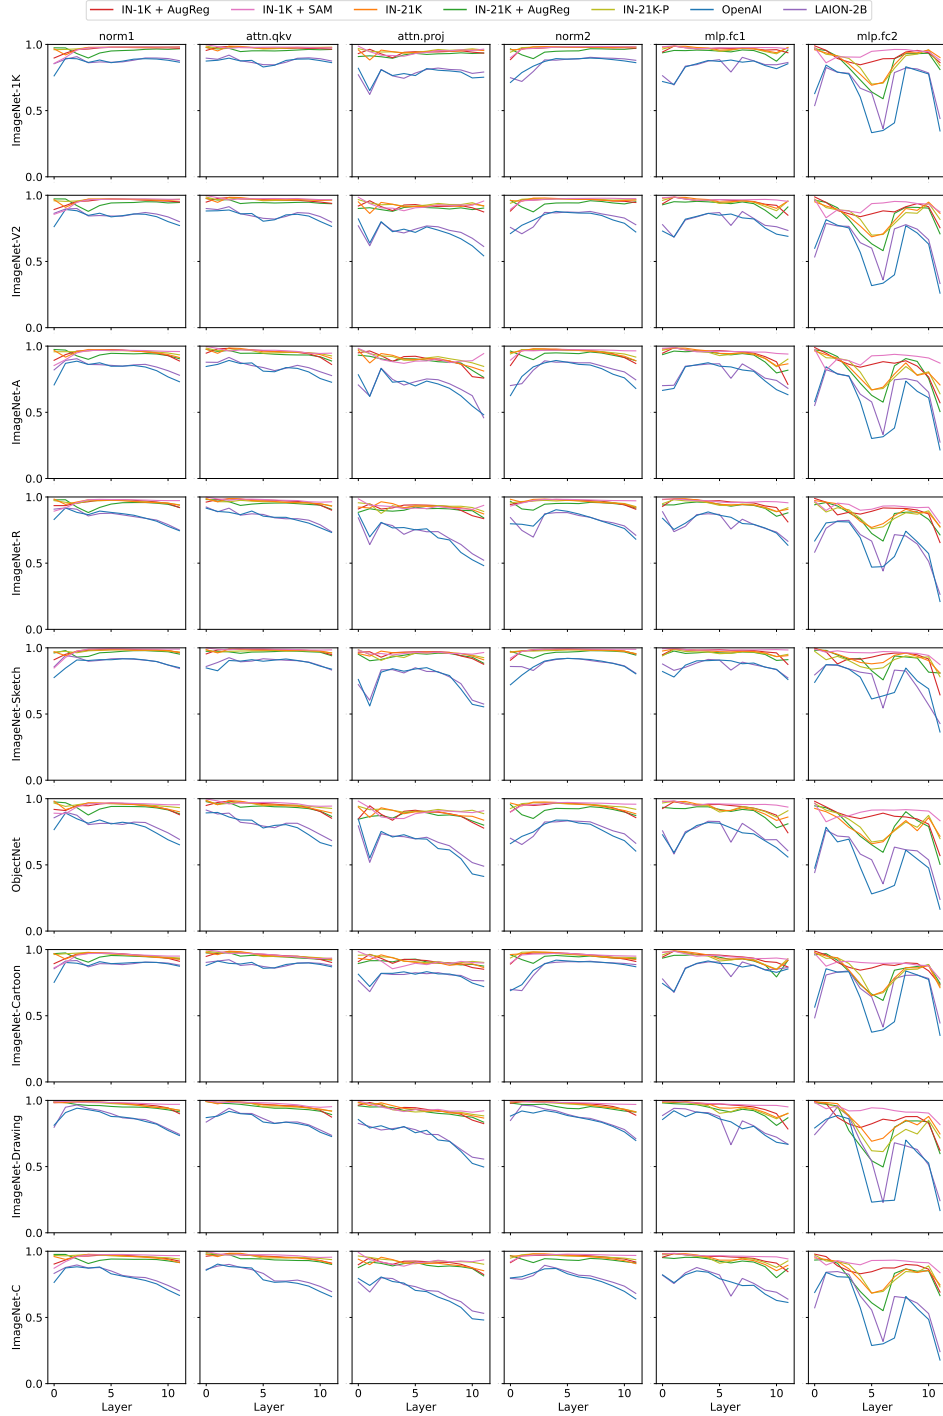

Figure S6: **Representational shifts from fine-tuning on ImageNet-Cartoon, analyzed by Centered Kernel Alignment (CKA), in ViT-B/16 models pretrained on various datasets.** Rows indicate datasets where CKA is measured, and column indicates different parts of the transformer demonstrated in Figure 9 in the main paper. Models pretrained on OpenAI and LAION-2B show distinct CKA patterns across layers compared to others.



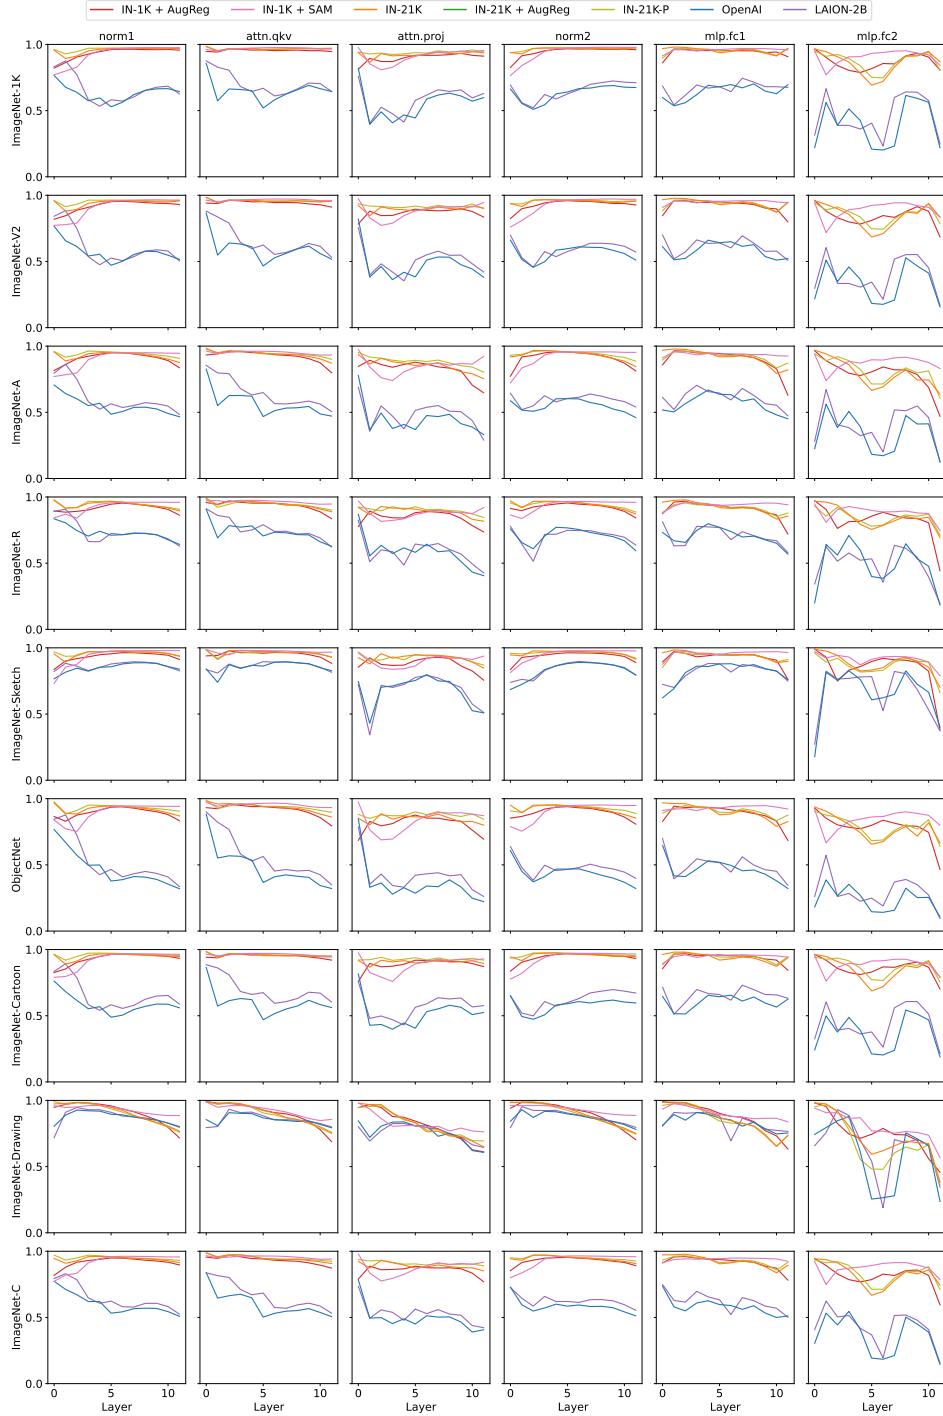

Figure S7: **Representational shifts from fine-tuning on ImageNet-Drawing, analyzed by Centered Kernel Alignment (CKA), in ViT-B/16 models pretrained on various datasets.** Rows indicate datasets where CKA is measured, and column indicates different parts of the transformer demonstrated in Figure 9 in the main paper. Models pretrained on OpenAI and LAION-2B show distinct CKA patterns across layers compared to others.

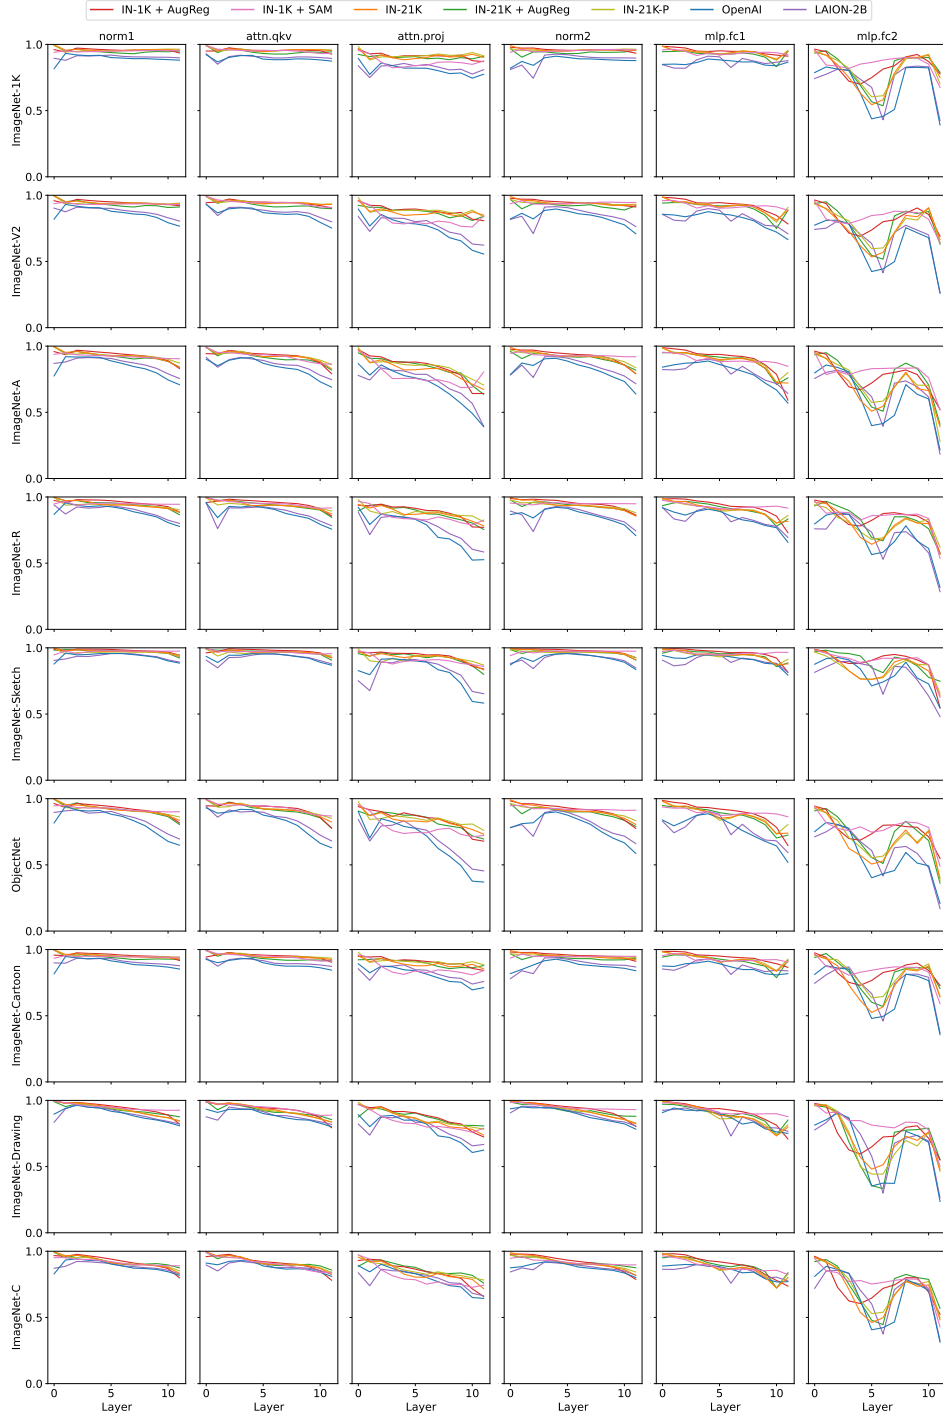

Figure S8: **Representational shifts from fine-tuning on ImageNet-C, analyzed by Centered Kernel Alignment (CKA), in ViT-B/16 models pretrained on various datasets.** Rows indicate datasets where CKA is measured, and column indicates different parts of the transformer demonstrated in Figure 9 in the main paper. Models pretrained on OpenAI and LAION-2B show distinct CKA patterns across layers compared to others.

Table S1: The accuracy on each OOD dataset after fine-tuning on ImageNet-1K with AugReg pretrained ViT-B/16 on the downstream datasets with various methods. Note that ImageNet-Drawing, ImageNet-Cartoon, and ImageNet-C are generated from the ImageNet validation set. Green and red indicate relative performance increases and decreases, respectively, compared to the pretrained model. Bold indicates the best performance on each evaluation dataset.

| Method                                                   | Fine-Tuning Dataset | IN-1K       | IN-V2       | IN-A        | IN-R        | IN-Sketch   | ObjNet      | IN-Cartoon  | IN-Drawing  | IN-C        |
|----------------------------------------------------------|---------------------|-------------|-------------|-------------|-------------|-------------|-------------|-------------|-------------|-------------|
| Pretrained                                               |                     | 79.2        | 66.4        | 15.0        | 38.0        | 28.0        | 25.7        | 66.2        | 39.1        | 56.0        |
| FT                                                       | IN-V2               | 78.4        | -           | <b>25.2</b> | 41.9        | 29.2        | 37.1        | 64.7        | 40.4        | 57.4        |
|                                                          | IN-A                | 72.9        | 60.6        | -           | 36.7        | 24.9        | 35.0        | 55.3        | 32.6        | 53.5        |
|                                                          | IN-R                | 69.8        | 59.2        | 20.9        | -           | 46.7        | 32.0        | 61.3        | 51.4        | 52.0        |
|                                                          | IN-Sketch           | 75.7        | 63.9        | 17.3        | <b>59.1</b> | -           | 33.0        | 66.3        | 50.8        | 53.8        |
|                                                          | ObjNet              | 74.4        | 62.2        | 24.9        | 36.3        | 25.1        | -           | 55.6        | 33.6        | 52.3        |
|                                                          | IN-Cartoon          | 85.2        | 63.5        | 19.9        | 40.5        | 29.5        | 33.5        | -           | 41.2        | 51.3        |
|                                                          | IN-Drawing          | 81.5        | 62.9        | 16.5        | 41.1        | 32.7        | 32.4        | 64.2        | -           | 56.0        |
|                                                          | IN-C                | <b>99.8</b> | 61.1        | 13.9        | 37.0        | 25.1        | 27.7        | <b>92.2</b> | <b>70.2</b> | -           |
| Linear Probing                                           | IN-V2               | 79.1        | -           | 15.6        | 38.2        | 28.1        | 33.1        | 66.2        | 39.0        | 55.9        |
|                                                          | IN-A                | 78.6        | 65.9        | -           | 38.5        | 27.4        | 34.1        | 65.6        | 38.6        | 55.8        |
|                                                          | IN-R                | 78.7        | 66.6        | 17.1        | -           | 30.2        | 33.4        | 66.1        | 39.8        | 56.2        |
|                                                          | IN-Sketch           | 77.2        | 64.8        | 16.6        | 46.3        | -           | 33.5        | 65.6        | 40.5        | 54.5        |
|                                                          | ObjNet              | 78.6        | 65.9        | 18.1        | 38.6        | 27.9        | -           | 65.1        | 39.3        | 56.1        |
|                                                          | IN-Cartoon          | 80.5        | 65.4        | 15.1        | 39.2        | 28.1        | 32.2        | -           | 40.9        | 55.6        |
|                                                          | IN-Drawing          | 78.1        | 65.2        | 14.9        | 41.3        | 28.5        | 33.3        | 65.6        | -           | 54.3        |
|                                                          | IN-C                | <b>97.1</b> | 61.9        | 15.1        | 36.8        | 25.2        | 28.3        | <b>83.3</b> | <b>57.4</b> | -           |
| Visual Prompt<br>(Bahng et al., 2022)                    | IN-V2               | 75.7        | -           | 12.7        | 39.6        | 27.4        | 34.4        | 60.5        | 36.7        | 47.9        |
|                                                          | IN-A                | 69.1        | 57.1        | -           | 36.3        | 21.9        | 32.7        | 50.6        | 26.1        | 38.0        |
|                                                          | IN-R                | 68.1        | 55.9        | 9.6         | -           | 36.2        | 30.0        | 55.7        | 41.8        | 40.1        |
|                                                          | IN-Sketch           | 72.2        | 59.5        | 9.4         | <b>51.6</b> | -           | 32.3        | 60.6        | 44.9        | 44.3        |
|                                                          | ObjNet              | 68.6        | 56.2        | 13.0        | 33.7        | 22.2        | -           | 46.8        | 23.0        | 35.3        |
|                                                          | IN-Cartoon          | 74.5        | 61.2        | 10.2        | 41.2        | 27.0        | 31.5        | -           | 35.2        | 41.8        |
|                                                          | IN-Drawing          | 72.1        | 59.4        | 8.4         | 42.2        | 28.8        | 30.6        | 59.3        | -           | 44.2        |
|                                                          | IN-C                | 77.9        | 65.2        | 14.8        | 40.1        | 28.3        | 35.7        | 63.5        | <b>49.8</b> | -           |
| LoRA<br>(Hu et al., 2021)                                | IN-V2               | 79.2        | -           | 15.3        | 38.2        | 28.1        | 33.2        | 66.4        | 39.3        | 56.1        |
|                                                          | IN-A                | 79.0        | 66.4        | -           | 38.9        | 27.8        | 35.5        | 65.2        | 39.3        | 56.5        |
|                                                          | IN-R                | 79.2        | 66.8        | 16.7        | -           | 29.7        | 34.8        | 66.9        | 40.0        | 56.7        |
|                                                          | IN-Sketch           | 79.2        | 66.8        | 16.5        | 45.9        | -           | 34.6        | 67.7        | 44.1        | 56.6        |
|                                                          | ObjNet              | 78.9        | 66.3        | 18.3        | 39.3        | 27.8        | -           | 65.1        | 39.2        | 55.0        |
|                                                          | IN-Cartoon          | 78.7        | 65.8        | 14.8        | 39.3        | 28.3        | 32.1        | -           | 39.8        | 54.6        |
|                                                          | IN-Drawing          | 77.9        | 66.3        | 15.0        | 43.7        | 32.1        | 33.5        | 66.4        | -           | 55.1        |
|                                                          | IN-C                | 79.9        | 67.4        | 16.3        | 39.2        | 28.1        | 34.1        | 67.5        | 40.8        | -           |
| EWC<br>(Kirkpatrick et al., 2017)                        | IN-V2               | 80.0        | -           | 19.7        | 41.8        | 29.4        | 36.8        | 67.1        | 42.8        | 58.2        |
|                                                          | IN-A                | 76.9        | 64.9        | -           | 40.4        | 27.8        | <b>38.2</b> | 61.1        | 36.5        | 56.6        |
|                                                          | IN-R                | 75.2        | 63.9        | 19.0        | -           | 43.9        | 33.3        | 66.4        | 57.5        | 56.1        |
|                                                          | IN-Sketch           | 78.9        | 66.6        | 16.6        | 52.2        | -           | 34.2        | 68.3        | 49.6        | 57.2        |
|                                                          | ObjNet              | 78.1        | 66.2        | 23.1        | 40.9        | 29.0        | -           | 62.4        | 39.8        | 56.9        |
|                                                          | IN-Cartoon          | 79.2        | 66.0        | 16.5        | 42.7        | 29.9        | 33.8        | -           | 42.6        | 54.7        |
|                                                          | IN-Drawing          | 79.3        | 66.7        | 16.3        | 44.5        | 34.0        | 34.7        | 67.9        | -           | 58.3        |
|                                                          | IN-C                | 80.1        | <b>67.8</b> | 20.0        | 42.5        | 31.2        | 37.5        | 66.8        | 50.0        | -           |
| LwF<br>(Li & Hoiem, 2017)                                | IN-V2               | 79.2        | -           | 22.9        | 41.3        | 29.4        | 36.4        | 65.8        | 41.0        | 57.9        |
|                                                          | IN-A                | 77.4        | 65.5        | -           | 39.4        | 27.5        | 36.7        | 61.8        | 38.3        | 57.2        |
|                                                          | IN-R                | 76.1        | 64.7        | 21.7        | -           | <b>47.8</b> | 34.1        | 66.8        | 54.9        | 57.2        |
|                                                          | IN-Sketch           | 77.3        | 65.2        | 17.3        | <b>57.8</b> | -           | 33.5        | 67.8        | 49.6        | 55.2        |
|                                                          | ObjNet              | 78.2        | 66.2        | 24.1        | 38.4        | 27.3        | -           | 62.3        | 38.8        | 56.3        |
|                                                          | IN-Cartoon          | 87.2        | 65.9        | 19.4        | 41.2        | 29.9        | 34.2        | -           | 42.7        | 55.6        |
|                                                          | IN-Drawing          | 84.0        | 65.4        | 17.7        | 41.9        | 33.2        | 33.4        | 67.7        | -           | 58.2        |
|                                                          | IN-C                | <b>99.2</b> | 65.8        | 13.5        | 40.7        | 27.8        | 31.4        | <b>90.6</b> | <b>61.7</b> | -           |
| LP-FT<br>(Kumar et al., 2022)                            | IN-V2               | 78.8        | -           | 24.7        | 41.6        | 29.3        | 36.8        | 65.3        | 41.3        | 57.6        |
|                                                          | IN-A                | 76.5        | 64.6        | -           | 38.2        | 27.4        | 37.1        | 60.5        | 36.7        | 56.2        |
|                                                          | IN-R                | 74.7        | 63.4        | 21.1        | -           | 46.9        | 34.7        | 65.4        | 53.1        | 55.3        |
|                                                          | IN-Sketch           | 76.2        | 64.5        | 18.0        | <b>58.8</b> | -           | 33.9        | 67.0        | 48.9        | 54.4        |
|                                                          | ObjNet              | 77.1        | 64.9        | 24.9        | 38.2        | 26.8        | -           | 60.7        | 37.7        | 54.9        |
|                                                          | IN-Cartoon          | 86.3        | 64.2        | 19.5        | 41.0        | 29.9        | 33.5        | -           | 43.1        | 52.8        |
|                                                          | IN-Drawing          | 82.1        | 63.2        | 16.5        | 41.7        | 32.9        | 32.0        | 64.8        | -           | 56.0        |
|                                                          | IN-C                | <b>98.0</b> | 61.0        | 13.7        | 37.5        | 25.7        | 27.3        | <b>87.1</b> | <b>66.0</b> | -           |
| WiSE-FT<br>(Wortsman et al., 2022b)                      | IN-V2               | 79.7        | -           | 21.3        | 40.5        | 29.5        | 36.0        | 66.5        | 40.9        | 58.0        |
|                                                          | IN-A                | 78.6        | 66.4        | -           | 39.3        | 28.5        | 37.1        | 64.4        | 38.6        | 57.8        |
|                                                          | IN-R                | 79.1        | 67.1        | 23.0        | -           | 44.7        | 37.4        | 69.5        | 54.7        | 59.6        |
|                                                          | IN-Sketch           | 78.9        | 66.4        | 17.6        | 52.1        | -           | 34.7        | 68.7        | 48.7        | 57.3        |
|                                                          | ObjNet              | 79.3        | 67.3        | 23.5        | 40.0        | 29.0        | -           | 65.2        | 40.5        | 57.6        |
|                                                          | IN-Cartoon          | 83.8        | 66.5        | 19.3        | 41.0        | 30.4        | 34.9        | -           | 43.2        | 56.3        |
|                                                          | IN-Drawing          | 82.5        | 66.9        | 18.5        | 42.2        | 33.5        | 35.0        | 68.2        | -           | 59.5        |
|                                                          | IN-C                | <b>93.4</b> | 66.9        | 18.7        | 41.3        | 29.9        | 34.7        | <b>82.4</b> | <b>57.6</b> | -           |
| Model Soup<br>PRE-FT-EWC-LwF<br>(Wortsman et al., 2022a) | IN-V2               | 79.8        | -           | 21.0        | 41.0        | 29.7        | 36.0        | 66.9        | 41.7        | 58.0        |
|                                                          | IN-A                | 78.3        | 66.4        | -           | 39.7        | 28.5        | 37.5        | 63.7        | 38.4        | 57.8        |
|                                                          | IN-R                | 78.9        | 67.1        | 23.1        | -           | 45.9        | 37.2        | 69.6        | 55.8        | 59.6        |
|                                                          | IN-Sketch           | 78.9        | 66.6        | 17.5        | 54.0        | -           | 34.6        | 69.1        | 49.8        | 57.5        |
|                                                          | ObjNet              | 79.3        | 67.4        | 24.1        | 40.3        | 29.1        | -           | 64.9        | 40.6        | 57.7        |
|                                                          | IN-Cartoon          | 83.7        | 66.4        | 18.9        | 41.8        | 30.6        | 34.7        | -           | 43.6        | 56.2        |
|                                                          | IN-Drawing          | 82.6        | 66.9        | 18.4        | 43.0        | 34.0        | 35.2        | 68.7        | -           | <b>59.7</b> |
|                                                          | IN-C                | <b>92.6</b> | 67.5        | 18.6        | 42.3        | 30.6        | 35.3        | <b>81.3</b> | <b>57.3</b> | -           |

Table S2: The accuracy on each OOD dataset after fine-tuning on ImageNet-1K with SAM pretrained ViT-B/16 on the downstream datasets with various methods. Note that ImageNet-Drawing, ImageNet-Cartoon, and ImageNet-C are generated from the ImageNet validation set. Green and red indicate relative performance increases and decreases, respectively, compared to the pretrained model. Bold indicates the best performance on each evaluation dataset.

| Method                                             | Downstream Dataset | $D_{pre}$ IN | IN-V2 | IN-A | IN-R | IN-Sketch | ObjNet | IN-Cartoon | IN-Drawing | IN-C |
|----------------------------------------------------|--------------------|--------------|-------|------|------|-----------|--------|------------|------------|------|
| Pretrained                                         |                    | 79.2         | 66.4  | 15.0 | 38.0 | 28.0      | 25.7   | 66.2       | 39.1       | 56.0 |
| Pretrained                                         |                    | 80.2         | 68.2  | 9.0  | 40.1 | 27.7      | 34.2   | 66.9       | 42.3       | 54.6 |
| FT                                                 | IN-V2              | 81.1         | -     | 17.1 | 42.9 | 29.7      | 38.7   | 69.5       | 44.1       | 56.8 |
|                                                    | IN-A               | 77.1         | 65.7  | -    | 37.9 | 25.7      | 39.8   | 60.4       | 30.9       | 51.3 |
|                                                    | IN-R               | 75.0         | 64.1  | 19.1 | -    | 49.5      | 36.1   | 66.9       | 53.6       | 53.9 |
|                                                    | IN-Sketch          | 79.2         | 67.3  | 14.2 | 59.5 | -         | 35.8   | 71.0       | 52.0       | 55.7 |
|                                                    | ObjNet             | 77.6         | 66.1  | 21.9 | 37.1 | 25.9      | -      | 57.3       | 32.2       | 52.2 |
|                                                    | IN-Cartoon         | 82.6         | 67.1  | 15.4 | 44.2 | 32.2      | 35.2   | -          | 42.8       | 51.3 |
|                                                    | IN-Drawing         | 79.9         | 65.1  | 12.9 | 45.1 | 34.0      | 33.5   | 67.2       | -          | 55.4 |
|                                                    | IN-C               | 99.7         | 63.0  | 15.5 | 39.3 | 27.1      | 30.4   | 92.5       | 71.4       | -    |
| Linear Probing                                     | IN-V2              | 80.3         | -     | 9.0  | 40.2 | 27.6      | 34.1   | 67.5       | 42.3       | 54.7 |
|                                                    | IN-A               | 80.2         | 68.0  | -    | 41.0 | 27.8      | 34.9   | 67.4       | 42.4       | 54.5 |
|                                                    | IN-R               | 80.1         | 68.1  | 9.6  | -    | 28.6      | 34.1   | 67.9       | 43.5       | 54.6 |
|                                                    | IN-Sketch          | 79.5         | 67.3  | 9.3  | 45.2 | -         | 34.2   | 67.7       | 44.9       | 54.1 |
|                                                    | ObjNet             | 80.1         | 67.9  | 9.2  | 40.0 | 27.9      | -      | 67.3       | 42.3       | 54.6 |
|                                                    | IN-Cartoon         | 80.3         | 68.1  | 8.4  | 41.6 | 28.2      | 32.8   | -          | 43.5       | 53.8 |
|                                                    | IN-Drawing         | 79.9         | 67.5  | 8.9  | 42.7 | 29.3      | 32.7   | 67.9       | -          | 54.6 |
|                                                    | IN-C               | 93.4         | 65.6  | 11.4 | 40.6 | 28.1      | 32.1   | 80.6       | 58.1       | -    |
| Visual Prompt (Bahng et al., 2022)                 | IN-V2              | 75.5         | -     | 8.1  | 39.9 | 24.1      | 35.5   | 58.5       | 35.0       | 44.7 |
|                                                    | IN-A               | 67.5         | 55.6  | -    | 35.8 | 19.1      | 34.0   | 45.6       | 26.4       | 30.4 |
|                                                    | IN-R               | 69.9         | 57.4  | 6.3  | -    | 32.0      | 29.2   | 56.5       | 39.7       | 36.8 |
|                                                    | IN-Sketch          | 71.2         | 58.2  | 5.6  | 47.2 | -         | 28.3   | 56.4       | 39.5       | 36.3 |
|                                                    | ObjNet             | 70.7         | 58.7  | 9.0  | 36.2 | 20.1      | -      | 48.2       | 27.2       | 35.3 |
|                                                    | IN-Cartoon         | 75.8         | 62.3  | 6.5  | 42.5 | 27.0      | 31.8   | -          | 39.8       | 42.3 |
|                                                    | IN-Drawing         | 72.8         | 59.8  | 5.4  | 43.0 | 28.1      | 28.6   | 59.0       | -          | 42.2 |
|                                                    | IN-C               | 77.7         | 65.7  | 8.8  | 41.3 | 28.0      | 36.7   | 62.1       | 44.1       | -    |
| LoRA (Hu et al., 2021)                             | IN-V2              | 80.2         | -     | 8.9  | 40.1 | 27.7      | 34.2   | 67.4       | 42.3       | 54.7 |
|                                                    | IN-A               | 80.2         | 68.2  | -    | 41.1 | 27.8      | 34.6   | 67.7       | 42.7       | 54.8 |
|                                                    | IN-R               | 80.2         | 68.2  | 9.7  | -    | 29.0      | 34.8   | 68.2       | 43.9       | 54.7 |
|                                                    | IN-Sketch          | 79.9         | 67.7  | 9.4  | 44.0 | -         | 34.7   | 68.1       | 44.8       | 54.6 |
|                                                    | ObjNet             | 80.1         | 68.0  | 9.2  | 40.9 | 28.2      | -      | 67.5       | 42.5       | 54.7 |
|                                                    | IN-Cartoon         | 80.1         | 68.2  | 8.7  | 41.5 | 28.2      | 33.3   | -          | 43.5       | 53.7 |
|                                                    | IN-Drawing         | 80.0         | 67.8  | 9.1  | 42.6 | 29.0      | 33.1   | 68.1       | -          | 54.5 |
|                                                    | IN-C               | 80.2         | 68.6  | 13.7 | 42.4 | 30.7      | 36.9   | 68.6       | 52.4       | -    |
| EWC (Kirkpatrick et al., 2017)                     | IN-V2              | 80.4         | -     | 9.7  | 40.8 | 28.2      | 35.0   | 67.8       | 43.0       | 55.1 |
|                                                    | IN-A               | 79.5         | 68.2  | -    | 41.3 | 27.4      | 39.0   | 64.3       | 41.5       | 54.7 |
|                                                    | IN-R               | 80.3         | 68.6  | 11.5 | -    | 36.2      | 36.5   | 70.2       | 49.6       | 56.3 |
|                                                    | IN-Sketch          | 80.1         | 68.1  | 9.7  | 47.9 | -         | 34.2   | 69.3       | 47.7       | 55.6 |
|                                                    | ObjNet             | 80.4         | 68.6  | 12.5 | 41.4 | 28.3      | -      | 66.7       | 43.0       | 56.5 |
|                                                    | IN-Cartoon         | 80.4         | 68.2  | 9.3  | 42.8 | 29.3      | 34.4   | -          | 44.6       | 54.3 |
|                                                    | IN-Drawing         | 80.1         | 67.9  | 10.0 | 44.5 | 31.2      | 35.3   | 68.7       | -          | 56.9 |
|                                                    | IN-C               | 80.4         | 68.6  | 11.0 | 41.2 | 28.8      | 36.7   | 66.8       | 44.7       | -    |
| LwF (Li & Hoiem, 2017)                             | IN-V2              | 81.1         | -     | 16.1 | 42.8 | 29.7      | 38.3   | 69.5       | 44.3       | 56.8 |
|                                                    | IN-A               | 78.6         | 67.1  | -    | 39.4 | 26.7      | 40.2   | 63.4       | 34.3       | 53.9 |
|                                                    | IN-R               | 77.2         | 66.1  | 17.9 | -    | 49.6      | 37.1   | 69.2       | 55.3       | 56.0 |
|                                                    | IN-Sketch          | 79.6         | 67.8  | 13.8 | 59.0 | -         | 35.7   | 71.3       | 51.6       | 56.3 |
|                                                    | ObjNet             | 79.4         | 67.7  | 20.2 | 39.7 | 27.5      | -      | 62.5       | 37.3       | 55.0 |
|                                                    | IN-Cartoon         | 82.9         | 68.0  | 14.7 | 44.3 | 32.0      | 35.7   | -          | 44.3       | 53.1 |
|                                                    | IN-Drawing         | 80.6         | 65.9  | 12.3 | 45.2 | 34.4      | 34.2   | 68.1       | -          | 56.2 |
|                                                    | IN-C               | 99.4         | 65.5  | 14.7 | 42.4 | 28.9      | 33.0   | 93.0       | 71.8       | -    |
| LP-FT (Kumar et al., 2022)                         | IN-V2              | 81.1         | -     | 16.9 | 42.8 | 29.7      | 38.6   | 69.4       | 44.0       | 56.8 |
|                                                    | IN-A               | 77.8         | 66.3  | -    | 38.5 | 26.1      | 40.2   | 61.7       | 32.7       | 52.3 |
|                                                    | IN-R               | 76.2         | 65.2  | 18.4 | -    | 49.7      | 37.1   | 67.9       | 54.9       | 54.5 |
|                                                    | IN-Sketch          | 78.9         | 67.1  | 13.9 | 60.0 | -         | 35.9   | 70.7       | 51.4       | 55.6 |
|                                                    | ObjNet             | 78.1         | 66.7  | 21.7 | 37.8 | 26.3      | -      | 59.0       | 33.7       | 53.0 |
|                                                    | IN-Cartoon         | 82.6         | 66.9  | 15.4 | 44.5 | 32.2      | 34.8   | -          | 43.3       | 51.1 |
|                                                    | IN-Drawing         | 79.6         | 64.6  | 12.9 | 46.1 | 34.4      | 32.5   | 66.9       | -          | 53.8 |
|                                                    | IN-C               | 93.9         | 65.1  | 11.6 | 41.2 | 28.9      | 31.4   | 82.5       | 61.4       | -    |
| WiSE-FT (Wortsman et al., 2022b)                   | IN-V2              | 80.9         | -     | 12.2 | 41.8 | 29.1      | 36.6   | 68.8       | 43.9       | 56.1 |
|                                                    | IN-A               | 80.7         | 69.0  | -    | 42.0 | 29.0      | 39.7   | 68.2       | 42.6       | 57.0 |
|                                                    | IN-R               | 80.5         | 69.0  | 15.2 | -    | 43.8      | 38.1   | 72.3       | 55.5       | 58.7 |
|                                                    | IN-Sketch          | 80.5         | 68.5  | 11.9 | 51.4 | -         | 36.2   | 70.9       | 49.9       | 56.8 |
|                                                    | ObjNet             | 80.6         | 69.0  | 15.4 | 41.1 | 28.9      | -      | 67.1       | 41.8       | 56.4 |
|                                                    | IN-Cartoon         | 82.3         | 69.0  | 12.2 | 43.5 | 30.9      | 36.1   | -          | 46.0       | 55.2 |
|                                                    | IN-Drawing         | 81.4         | 68.5  | 11.7 | 44.1 | 32.6      | 35.7   | 69.9       | -          | 57.9 |
|                                                    | IN-C               | 89.1         | 69.2  | 16.6 | 43.5 | 31.5      | 37.1   | 79.5       | 56.3       | -    |
| Model Soup PRE-FT-EWC-LwF (Wortsman et al., 2022a) | IN-V2              | 80.8         | -     | 12.2 | 41.9 | 29.1      | 36.6   | 68.9       | 44.0       | 56.1 |
|                                                    | IN-A               | 80.5         | 68.9  | -    | 41.9 | 28.6      | 40.4   | 67.5       | 41.6       | 57.0 |
|                                                    | IN-R               | 80.3         | 69.1  | 15.5 | -    | 44.8      | 38.2   | 72.4       | 55.7       | 58.7 |
|                                                    | IN-Sketch          | 80.5         | 68.5  | 12.0 | 52.6 | -         | 36.3   | 71.1       | 50.4       | 57.0 |
|                                                    | ObjNet             | 80.6         | 69.0  | 15.7 | 41.3 | 28.9      | -      | 66.7       | 41.9       | 56.7 |
|                                                    | IN-Cartoon         | 82.2         | 68.9  | 12.1 | 43.9 | 31.1      | 35.9   | -          | 46.1       | 55.0 |
|                                                    | IN-Drawing         | 81.2         | 68.4  | 11.7 | 44.8 | 33.2      | 35.7   | 70.0       | -          | 58.0 |
|                                                    | IN-C               | 89.3         | 69.3  | 16.2 | 43.9 | 31.7      | 37.3   | 79.5       | 57.2       | -    |

Table S3: The accuracy on each OOD dataset after fine-tuning ImageNet-21K pretrained ViT-B/16 on the downstream datasets with various methods. Note that ImageNet-Drawing, ImageNet-Cartoon, and ImageNet-C are generated from the ImageNet validation set. Green and red indicate relative performance increases and decreases, respectively, compared to the pretrained model. Bold indicates the best performance on each evaluation dataset.

| Method                                                   | Downstream Dataset | $D_{pre}$ IN | IN-V2       | IN-A        | IN-R        | IN-Sketch   | ObjNet      | IN-Cartoon  | IN-Drawing  | IN-C        |
|----------------------------------------------------------|--------------------|--------------|-------------|-------------|-------------|-------------|-------------|-------------|-------------|-------------|
| Pretrained                                               |                    | 81.8         | 71.4        | 32.0        | 47.3        | 35.8        | 42.5        | 69.4        | 44.1        | 58.3        |
| FT                                                       | IN-V2              | 81.7         | -           | <b>40.4</b> | 49.6        | 36.2        | 45.4        | 68.5        | 41.6        | 58.5        |
|                                                          | IN-A               | 78.2         | 68.1        | -           | 47.4        | 33.4        | 45.7        | 62.7        | 37.2        | 55.0        |
|                                                          | IN-R               | 75.5         | 65.2        | 34.2        | -           | <b>50.2</b> | 39.8        | 64.6        | 48.9        | 52.9        |
|                                                          | IN-Sketch          | 78.8         | 68.3        | 32.6        | <b>64.7</b> | -           | 41.7        | 69.7        | 51.3        | 55.5        |
|                                                          | ObjNet             | 78.5         | 67.8        | <b>39.3</b> | 44.3        | 32.5        | -           | <b>60.6</b> | <b>33.3</b> | 52.8        |
|                                                          | IN-Cartoon         | 85.2         | 68.0        | 33.0        | 49.5        | 36.4        | 41.9        | -           | 41.4        | 52.9        |
|                                                          | IN-Drawing         | 81.5         | 66.6        | <b>27.0</b> | 50.3        | 38.4        | 39.4        | 67.0        | -           | 55.3        |
|                                                          | IN-C               | <b>99.7</b>  | 65.6        | 25.4        | 45.4        | 32.9        | 36.7        | <b>93.2</b> | <b>72.9</b> | -           |
| Linear Probing                                           | IN-V2              | 81.8         | -           | 32.8        | 47.6        | 35.9        | 42.9        | 69.7        | 44.2        | 58.5        |
|                                                          | IN-A               | 81.4         | 71.0        | -           | 48.6        | 35.9        | 45.9        | 67.8        | 43.9        | 58.7        |
|                                                          | IN-R               | 80.5         | 70.1        | 33.5        | -           | 38.3        | 42.0        | 69.8        | 44.3        | 56.7        |
|                                                          | IN-Sketch          | 79.9         | 69.2        | 30.1        | 53.9        | -           | 41.1        | 69.9        | 44.5        | 56.4        |
|                                                          | ObjNet             | 81.3         | 71.1        | <b>37.6</b> | 48.3        | 36.1        | -           | 67.9        | 44.2        | 58.9        |
|                                                          | IN-Cartoon         | 82.5         | 70.3        | 31.7        | 49.3        | 36.4        | 41.5        | -           | 45.2        | 56.9        |
|                                                          | IN-Drawing         | 82.0         | 70.2        | 32.8        | 50.0        | 38.1        | 42.5        | 71.0        | -           | 59.0        |
|                                                          | IN-C               | <b>96.7</b>  | 65.3        | 27.6        | 42.8        | 31.7        | 36.2        | <b>85.5</b> | <b>57.0</b> | -           |
| Visual Prompt<br>(Bahng et al., 2022)                    | IN-V2              | 76.0         | -           | 25.2        | 43.8        | 29.4        | 41.7        | 58.2        | 32.1        | 45.5        |
|                                                          | IN-A               | 71.7         | 60.6        | -           | 41.0        | 24.1        | 39.2        | 50.9        | 25.8        | 38.3        |
|                                                          | IN-R               | 69.9         | 59.1        | 18.1        | -           | 35.0        | 35.0        | 54.9        | 35.8        | 38.3        |
|                                                          | IN-Sketch          | 72.9         | 61.7        | 18.1        | 53.3        | -           | 38.7        | 58.3        | 40.3        | 41.1        |
|                                                          | ObjNet             | 71.1         | 59.6        | 25.1        | 38.0        | 23.8        | -           | <b>49.0</b> | <b>22.6</b> | 36.9        |
|                                                          | IN-Cartoon         | 75.6         | 63.4        | 20.9        | 44.9        | 29.9        | 37.9        | -           | 33.9        | 41.9        |
|                                                          | IN-Drawing         | 73.3         | 61.8        | 17.1        | 45.4        | 30.0        | 35.1        | 55.5        | -           | 41.8        |
|                                                          | IN-C               | 78.9         | 67.2        | 25.3        | 45.5        | 31.5        | 42.7        | 63.6        | 43.5        | -           |
| LoRA<br>(Hu et al., 2021)                                | IN-V2              | 81.8         | -           | 32.4        | 47.4        | 35.8        | 42.8        | 69.6        | 44.1        | 58.4        |
|                                                          | IN-A               | 81.7         | 71.2        | -           | 48.5        | 35.9        | 45.9        | 67.9        | 43.8        | 58.9        |
|                                                          | IN-R               | 79.6         | 68.3        | 30.2        | -           | 37.4        | 40.2        | 69.7        | 43.3        | 53.6        |
|                                                          | IN-Sketch          | 80.4         | 69.4        | 30.1        | 51.2        | -           | 40.6        | 70.7        | 43.0        | 56.3        |
|                                                          | ObjNet             | 81.8         | 71.5        | <b>37.4</b> | 48.7        | 36.1        | -           | 67.7        | 43.9        | 59.2        |
|                                                          | IN-Cartoon         | 81.1         | 70.1        | 30.9        | 49.4        | 36.4        | 41.3        | -           | 44.1        | 56.1        |
|                                                          | IN-Drawing         | 81.6         | 71.0        | 32.1        | 49.9        | 37.3        | 42.7        | 70.2        | -           | 58.0        |
|                                                          | IN-C               | 81.5         | 70.7        | 29.8        | 45.8        | 33.4        | 42.3        | 69.6        | 37.8        | -           |
| EWC<br>(Kirkpatrick et al., 2017)                        | IN-V2              | 82.2         | -           | 35.5        | 49.0        | 36.3        | 44.8        | 70.2        | 44.7        | 59.4        |
|                                                          | IN-A               | 81.1         | 70.9        | -           | 49.1        | 35.4        | <b>48.4</b> | 66.7        | 41.0        | 58.8        |
|                                                          | IN-R               | 80.8         | 69.8        | 34.5        | -           | <b>44.3</b> | 42.6        | 70.3        | 51.0        | 57.6        |
|                                                          | IN-Sketch          | 81.8         | 71.2        | 31.9        | 57.1        | -           | 42.5        | 71.8        | 51.6        | 59.3        |
|                                                          | ObjNet             | 80.9         | 69.8        | <b>39.0</b> | 47.8        | 35.3        | -           | 66.5        | 42.3        | 58.2        |
|                                                          | IN-Cartoon         | 81.8         | 70.5        | 32.6        | 50.6        | 36.8        | 42.4        | -           | 45.2        | 56.7        |
|                                                          | IN-Drawing         | 81.0         | 70.6        | 31.7        | 52.1        | 38.0        | 44.0        | 69.1        | -           | 59.4        |
|                                                          | IN-C               | 82.2         | <b>71.6</b> | 35.2        | 50.3        | 37.7        | 45.4        | 69.1        | 51.1        | -           |
| LwF<br>(Li & Hoiem, 2017)                                | IN-V2              | 81.8         | -           | 38.3        | 49.2        | 36.6        | 44.8        | 69.3        | 42.6        | 59.3        |
|                                                          | IN-A               | 80.5         | 70.3        | -           | 48.5        | 34.9        | 45.6        | 66.4        | 41.7        | 58.1        |
|                                                          | IN-R               | 79.4         | 68.6        | 35.7        | -           | <b>49.6</b> | 41.6        | 69.1        | 52.0        | 57.3        |
|                                                          | IN-Sketch          | 80.1         | 70.0        | 33.2        | <b>64.0</b> | -           | 42.7        | 71.0        | 51.6        | 57.3        |
|                                                          | ObjNet             | 81.1         | 70.3        | <b>38.3</b> | 46.8        | 35.0        | -           | 66.0        | 39.6        | 57.0        |
|                                                          | IN-Cartoon         | 86.7         | 70.5        | 34.7        | 50.4        | 37.3        | 43.3        | -           | 43.8        | 57.9        |
|                                                          | IN-Drawing         | 83.3         | 68.9        | 29.6        | 51.2        | 39.0        | 40.9        | 69.3        | -           | 58.1        |
|                                                          | IN-C               | <b>99.7</b>  | 67.4        | 25.3        | 48.1        | 35.2        | 38.2        | <b>93.3</b> | <b>72.3</b> | -           |
| LP-FT<br>(Kumar et al., 2022)                            | IN-V2              | 81.6         | -           | 39.8        | 49.3        | 36.3        | 45.2        | 69.0        | 42.2        | 58.7        |
|                                                          | IN-A               | 79.6         | 69.2        | -           | 48.3        | 35.0        | 46.6        | 64.7        | 39.9        | 56.7        |
|                                                          | IN-R               | 77.8         | 67.4        | 35.0        | -           | <b>50.2</b> | 41.8        | 68.1        | 51.2        | 55.4        |
|                                                          | IN-Sketch          | 78.9         | 68.5        | 32.6        | <b>64.4</b> | -           | 41.7        | 70.4        | 50.5        | 55.8        |
|                                                          | ObjNet             | 79.9         | 69.2        | 40.2        | 46.2        | 33.9        | -           | 63.8        | 37.2        | 55.5        |
|                                                          | IN-Cartoon         | 86.0         | 68.2        | 33.1        | 49.8        | 36.7        | 42.0        | -           | 43.4        | 54.4        |
|                                                          | IN-Drawing         | 82.2         | 67.1        | 27.8        | 50.9        | 39.1        | 39.3        | 67.7        | -           | 56.0        |
|                                                          | IN-C               | <b>99.1</b>  | 63.5        | 21.4        | 43.7        | 31.3        | 33.6        | <b>92.2</b> | <b>71.7</b> | -           |
| WiSE-FT<br>(Wortsman et al., 2022b)                      | IN-V2              | 82.1         | -           | 37.6        | 49.0        | 36.6        | 45.2        | 69.7        | 43.9        | 59.3        |
|                                                          | IN-A               | 81.3         | 71.2        | -           | 49.1        | 36.3        | 47.0        | 68.4        | 43.4        | 59.0        |
|                                                          | IN-R               | 81.5         | 71.3        | 38.2        | -           | <b>47.6</b> | 45.6        | 71.7        | 53.7        | 60.0        |
|                                                          | IN-Sketch          | 81.5         | 71.4        | 34.2        | <b>59.4</b> | -           | 43.9        | 72.1        | 51.7        | 59.2        |
|                                                          | ObjNet             | 81.5         | 71.1        | <b>39.0</b> | 48.0        | 36.3        | -           | 68.1        | 42.0        | 58.2        |
|                                                          | IN-Cartoon         | 84.8         | 71.3        | 34.8        | 49.8        | 37.2        | 44.0        | -           | 45.6        | 58.1        |
|                                                          | IN-Drawing         | 83.1         | 71.0        | 32.9        | 51.0        | 39.6        | 43.3        | 70.6        | -           | 59.8        |
|                                                          | IN-C               | <b>92.0</b>  | 71.3        | 33.7        | 50.4        | 38.4        | 43.8        | <b>82.4</b> | <b>60.8</b> | -           |
| Model Soup<br>PRE-FT-EWC-LwF<br>(Wortsman et al., 2022a) | IN-V2              | 82.2         | -           | 37.4        | 49.1        | 36.6        | 45.1        | 69.8        | 44.0        | 59.5        |
|                                                          | IN-A               | 81.2         | 71.2        | -           | 49.3        | 36.0        | 47.1        | 67.9        | 42.9        | 59.1        |
|                                                          | IN-R               | 81.4         | 71.2        | 37.6        | -           | <b>48.0</b> | 44.7        | 71.8        | 53.6        | 59.8        |
|                                                          | IN-Sketch          | 81.6         | 71.4        | 34.3        | <b>60.8</b> | -           | 43.8        | 72.4        | 52.5        | 59.4        |
|                                                          | ObjNet             | 81.5         | 70.9        | 39.2        | 48.1        | 36.2        | -           | 67.9        | 42.2        | 58.3        |
|                                                          | IN-Cartoon         | 84.7         | 71.1        | 34.9        | 50.3        | 37.5        | 44.0        | -           | 45.6        | 58.2        |
|                                                          | IN-Drawing         | 83.1         | 71.1        | 32.8        | 51.7        | 39.8        | 43.5        | 70.6        | -           | <b>60.1</b> |
|                                                          | IN-C               | <b>93.5</b>  | 71.2        | 33.1        | 50.9        | 38.9        | 43.6        | <b>84.1</b> | <b>62.9</b> | -           |

Table S4: The accuracy on each OOD dataset after fine-tuning ImageNet-21K-P pretrained ViT-B/16 on the downstream datasets with various methods. Note that ImageNet-Drawing, ImageNet-Cartoon, and ImageNet-C are generated from the ImageNet validation set. Green and red indicate relative performance increases and decreases, respectively, compared to the pretrained model. Bold indicates the best performance on each evaluation dataset.

| Method                                                   | Downstream Dataset | $D_{pre}$ IN | IN-V2 | IN-A | IN-R | IN-Sketch | ObjNet | IN-Cartoon | IN-Drawing | IN-C |
|----------------------------------------------------------|--------------------|--------------|-------|------|------|-----------|--------|------------|------------|------|
| Pretrained                                               |                    | 84.3         | 74.0  | 34.1 | 51.5 | 40.2      | 46.7   | 73.5       | 45.1       | 61.4 |
| FT                                                       | IN-V2              | 83.5         | -     | 44.6 | 52.9 | 40.4      | 47.1   | 71.4       | 39.2       | 62.1 |
|                                                          | IN-A               | 80.8         | 70.7  | -    | 50.3 | 38.6      | 47.2   | 65.5       | 35.5       | 60.5 |
|                                                          | IN-R               | 78.9         | 68.8  | 38.7 | -    | 54.6      | 42.8   | 69.9       | 54.2       | 57.5 |
|                                                          | IN-Sketch          | 81.9         | 71.8  | 35.4 | 67.0 | -         | 44.5   | 74.8       | 54.4       | 59.3 |
|                                                          | ObjNet             | 81.1         | 70.6  | 43.8 | 47.5 | 36.8      | -      | 63.1       | 29.6       | 57.7 |
|                                                          | IN-Cartoon         | 89.0         | 71.0  | 38.0 | 51.9 | 40.2      | 43.4   | -          | 42.5       | 56.1 |
|                                                          | IN-Drawing         | 85.8         | 69.5  | 31.4 | 52.7 | 42.7      | 41.8   | 70.3       | -          | 57.9 |
|                                                          | IN-C               | 99.8         | 67.9  | 25.6 | 47.1 | 34.7      | 37.4   | 95.0       | 73.7       | -    |
| Linear Probing                                           | IN-V2              | 84.3         | -     | 34.8 | 51.6 | 40.0      | 46.4   | 74.1       | 45.6       | 61.4 |
|                                                          | IN-A               | 84.0         | 73.9  | -    | 51.9 | 40.1      | 48.5   | 73.9       | 45.2       | 61.8 |
|                                                          | IN-R               | 83.8         | 73.9  | 35.6 | -    | 42.0      | 46.5   | 73.3       | 46.1       | 61.0 |
|                                                          | IN-Sketch          | 83.2         | 73.4  | 34.8 | 57.2 | -         | 46.9   | 73.4       | 47.7       | 60.8 |
|                                                          | ObjNet             | 83.9         | 73.7  | 36.6 | 51.3 | 39.8      | -      | 73.7       | 45.1       | 61.9 |
|                                                          | IN-Cartoon         | 85.6         | 73.8  | 34.5 | 52.3 | 40.3      | 45.7   | -          | 46.5       | 61.3 |
|                                                          | IN-Drawing         | 84.5         | 73.5  | 33.2 | 53.0 | 41.7      | 45.5   | 74.5       | -          | 62.0 |
|                                                          | IN-C               | 97.3         | 68.4  | 30.0 | 44.6 | 33.4      | 39.2   | 86.4       | 56.2       | -    |
| Visual Prompt<br>(Bahng et al., 2022)                    | IN-V2              | 79.7         | -     | 27.1 | 46.9 | 32.7      | 45.2   | 62.1       | 32.9       | 49.6 |
|                                                          | IN-A               | 76.7         | 66.0  | -    | 44.0 | 27.5      | 46.4   | 55.6       | 27.6       | 44.6 |
|                                                          | IN-R               | 74.1         | 62.8  | 20.3 | -    | 41.0      | 39.4   | 59.3       | 42.1       | 40.5 |
|                                                          | IN-Sketch          | 77.0         | 65.5  | 18.3 | 56.6 | -         | 40.9   | 62.6       | 43.8       | 44.1 |
|                                                          | ObjNet             | 72.4         | 61.1  | 22.1 | 34.8 | 23.1      | -      | 46.4       | 18.4       | 34.8 |
|                                                          | IN-Cartoon         | 79.0         | 67.2  | 21.6 | 48.5 | 33.4      | 41.7   | -          | 34.8       | 44.2 |
|                                                          | IN-Drawing         | 75.9         | 63.9  | 17.1 | 48.0 | 33.2      | 38.4   | 58.5       | -          | 44.3 |
|                                                          | IN-C               | 80.9         | 70.2  | 28.5 | 48.5 | 35.4      | 45.1   | 65.6       | 46.9       | -    |
| LoRA<br>(Hu et al., 2021)                                | IN-V2              | 84.2         | -     | 34.5 | 51.3 | 40.3      | 46.6   | 73.9       | 45.5       | 61.3 |
|                                                          | IN-A               | 84.1         | 74.1  | -    | 51.4 | 40.1      | 47.9   | 73.7       | 45.4       | 62.1 |
|                                                          | IN-R               | 84.1         | 73.9  | 35.5 | -    | 41.0      | 46.7   | 74.1       | 46.1       | 61.2 |
|                                                          | IN-Sketch          | 84.1         | 73.8  | 34.1 | 55.0 | -         | 46.4   | 74.5       | 49.4       | 61.4 |
|                                                          | ObjNet             | 84.2         | 74.1  | 36.8 | 51.3 | 40.0      | -      | 73.6       | 45.6       | 62.1 |
|                                                          | IN-Cartoon         | 84.0         | 73.6  | 33.9 | 52.1 | 40.7      | 45.4   | -          | 45.6       | 60.3 |
|                                                          | IN-Drawing         | 84.0         | 73.6  | 33.5 | 54.9 | 43.9      | 45.9   | 73.9       | -          | 61.6 |
|                                                          | IN-C               | 84.5         | 74.3  | 35.3 | 50.6 | 38.6      | 46.7   | 73.9       | 45.1       | -    |
| EWC<br>(Kirkpatrick et al., 2017)                        | IN-V2              | 84.4         | -     | 37.9 | 52.6 | 40.9      | 47.8   | 74.1       | 45.8       | 62.4 |
|                                                          | IN-A               | 83.8         | 74.4  | -    | 53.2 | 40.3      | 50.8   | 72.0       | 42.0       | 63.7 |
|                                                          | IN-R               | 81.4         | 71.4  | 30.2 | -    | 52.1      | 43.3   | 72.7       | 57.7       | 55.3 |
|                                                          | IN-Sketch          | 83.9         | 73.6  | 34.2 | 62.0 | -         | 46.2   | 76.0       | 54.4       | 61.4 |
|                                                          | ObjNet             | 84.0         | 74.1  | 42.0 | 51.9 | 40.5      | -      | 71.7       | 42.6       | 62.5 |
|                                                          | IN-Cartoon         | 84.3         | 73.7  | 35.3 | 54.2 | 41.5      | 46.0   | -          | 47.0       | 59.9 |
|                                                          | IN-Drawing         | 83.4         | 73.0  | 33.3 | 56.1 | 44.0      | 45.0   | 73.3       | -          | 60.9 |
|                                                          | IN-C               | 84.2         | 74.2  | 38.8 | 52.7 | 41.5      | 48.5   | 73.0       | 50.9       | -    |
| LwF<br>(Li & Hoiem, 2017)                                | IN-V2              | 83.9         | -     | 44.0 | 53.5 | 41.1      | 47.2   | 72.9       | 42.0       | 62.9 |
|                                                          | IN-A               | 83.3         | 73.7  | -    | 52.4 | 40.2      | 48.4   | 71.2       | 42.5       | 63.5 |
|                                                          | IN-R               | 82.3         | 72.2  | 40.9 | -    | 55.0      | 45.1   | 74.3       | 57.2       | 62.0 |
|                                                          | IN-Sketch          | 82.9         | 72.7  | 36.7 | 65.9 | -         | 45.4   | 75.7       | 53.7       | 61.1 |
|                                                          | ObjNet             | 83.5         | 73.3  | 44.5 | 50.4 | 39.8      | -      | 69.7       | 38.5       | 61.8 |
|                                                          | IN-Cartoon         | 89.8         | 73.1  | 39.6 | 53.3 | 41.7      | 45.4   | -          | 45.6       | 61.3 |
|                                                          | IN-Drawing         | 87.0         | 71.5  | 32.8 | 53.7 | 43.6      | 44.0   | 73.4       | -          | 61.2 |
|                                                          | IN-C               | 99.7         | 70.5  | 25.6 | 50.3 | 37.6      | 40.6   | 94.7       | 71.9       | -    |
| LP-FT<br>(Kumar et al., 2022)                            | IN-V2              | 83.6         | -     | 44.2 | 52.4 | 39.8      | 47.1   | 72.0       | 39.9       | 62.5 |
|                                                          | IN-A               | 82.5         | 72.8  | -    | 51.6 | 39.3      | 48.7   | 69.5       | 40.0       | 62.6 |
|                                                          | IN-R               | 81.3         | 71.5  | 40.6 | -    | 54.3      | 45.3   | 73.1       | 56.2       | 60.5 |
|                                                          | IN-Sketch          | 82.2         | 71.9  | 37.2 | 66.7 | -         | 45.6   | 75.0       | 53.0       | 60.2 |
|                                                          | ObjNet             | 82.6         | 72.3  | 44.7 | 49.8 | 39.1      | -      | 67.9       | 36.9       | 60.6 |
|                                                          | IN-Cartoon         | 89.8         | 71.4  | 38.4 | 52.5 | 40.5      | 43.9   | -          | 44.6       | 58.8 |
|                                                          | IN-Drawing         | 86.5         | 69.9  | 30.3 | 53.1 | 43.2      | 41.9   | 71.4       | -          | 58.7 |
|                                                          | IN-C               | 99.9         | 64.7  | 19.8 | 43.5 | 30.7      | 33.1   | 96.1       | 78.2       | -    |
| WiSE-FT<br>(Wortsman et al., 2022b)                      | IN-V2              | 84.4         | -     | 42.1 | 53.0 | 41.4      | 48.3   | 73.9       | 44.7       | 63.3 |
|                                                          | IN-A               | 84.0         | 74.3  | -    | 53.1 | 41.8      | 50.2   | 73.0       | 44.9       | 64.1 |
|                                                          | IN-R               | 84.0         | 74.3  | 43.1 | -    | 53.6      | 48.2   | 76.8       | 59.0       | 64.3 |
|                                                          | IN-Sketch          | 84.0         | 74.1  | 37.4 | 62.9 | -         | 47.3   | 76.6       | 54.4       | 62.7 |
|                                                          | ObjNet             | 84.1         | 74.2  | 43.8 | 51.9 | 41.8      | -      | 72.3       | 42.3       | 62.9 |
|                                                          | IN-Cartoon         | 87.4         | 74.0  | 40.1 | 53.5 | 42.1      | 46.9   | -          | 47.8       | 61.4 |
|                                                          | IN-Drawing         | 86.4         | 73.5  | 37.1 | 54.6 | 44.5      | 46.5   | 75.6       | -          | 63.5 |
|                                                          | IN-C               | 94.1         | 73.3  | 36.9 | 53.4 | 41.6      | 46.1   | 87.3       | 63.8       | -    |
| Model Soup<br>PRE-FT-EWC-LwF<br>(Wortsman et al., 2022a) | IN-V2              | 84.4         | -     | 41.7 | 53.2 | 41.5      | 48.1   | 74.0       | 44.9       | 63.3 |
|                                                          | IN-A               | 83.9         | 74.3  | -    | 53.2 | 41.6      | 50.2   | 72.5       | 44.1       | 64.1 |
|                                                          | IN-R               | 83.9         | 74.1  | 42.7 | -    | 54.2      | 47.9   | 76.8       | 59.4       | 64.1 |
|                                                          | IN-Sketch          | 84.0         | 74.0  | 37.3 | 64.0 | -         | 47.1   | 76.7       | 55.0       | 62.7 |
|                                                          | ObjNet             | 84.1         | 74.2  | 44.4 | 51.9 | 41.4      | -      | 71.9       | 42.1       | 62.9 |
|                                                          | IN-Cartoon         | 87.2         | 74.0  | 39.5 | 53.8 | 42.1      | 46.6   | -          | 47.6       | 61.4 |
|                                                          | IN-Drawing         | 86.2         | 73.5  | 37.0 | 55.0 | 44.6      | 46.6   | 75.4       | -          | 63.4 |
|                                                          | IN-C               | 93.8         | 73.9  | 36.3 | 53.8 | 42.1      | 46.2   | 86.4       | 63.4       | -    |

Table S5: The accuracy on each OOD dataset after fine-tuning ImageNet-21K with AugReg pretrained ViT-B/16 on the downstream datasets with various methods. Note that ImageNet-Drawing, ImageNet-Cartoon, and ImageNet-C are generated from the ImageNet validation set. Green and red indicate relative performance increases and decreases, respectively, compared to the pretrained model. Bold indicates the best performance on each evaluation dataset.

| Method                                                   | Downstream Dataset | $D_{pre}$ IN | IN-V2 | IN-A | Realistic OOD | IN-Sketch | ObjNet | IN-Cartoon | Synthetic OOD | IN-C |
|----------------------------------------------------------|--------------------|--------------|-------|------|---------------|-----------|--------|------------|---------------|------|
| Pretrained                                               |                    | 84.5         | 74.0  | 43.2 | 56.8          | 43.2      | 48.4   | 75.1       | 54.9          | 66.5 |
| FT                                                       | IN-V2              | 81.3         | -     | 47.5 | 56.8          | 40.0      | 49.7   | 70.6       | 49.3          | 64.4 |
|                                                          | IN-A               | 74.8         | 64.8  | -    | 50.6          | 35.6      | 46.3   | 60.7       | 40.7          | 56.3 |
|                                                          | IN-R               | 73.8         | 63.7  | 33.9 | -             | 52.4      | 42.5   | 65.1       | 54.4          | 55.7 |
|                                                          | IN-Sketch          | 75.2         | 65.2  | 28.4 | 70.6          | -         | 43.7   | 65.3       | 54.2          | 54.8 |
|                                                          | ObjNet             | 76.7         | 65.6  | 37.1 | 47.6          | 32.5      | -      | 62.2       | 36.0          | 54.9 |
|                                                          | IN-Cartoon         | 95.3         | 67.2  | 35.1 | 54.9          | 39.8      | 44.8   | -          | 58.9          | 61.5 |
|                                                          | IN-Drawing         | 91.1         | 65.2  | 27.6 | 54.2          | 41.1      | 41.1   | 78.4       | -             | 59.9 |
|                                                          | IN-C               | 99.9         | 62.7  | 20.2 | 46.5          | 31.8      | 35.0   | 98.1       | 84.1          | -    |
| Linear Probing                                           | IN-V2              | 83.1         | -     | 45.1 | 56.3          | 42.8      | 48.3   | 73.7       | 53.3          | 65.7 |
|                                                          | IN-A               | 83.3         | 73.6  | -    | 56.7          | 42.5      | 51.0   | 73.6       | 52.8          | 65.8 |
|                                                          | IN-R               | 82.2         | 72.1  | 44.6 | -             | 45.3      | 49.2   | 71.6       | 52.2          | 64.0 |
|                                                          | IN-Sketch          | 79.3         | 69.2  | 42.3 | 64.6          | -         | 49.0   | 70.0       | 53.0          | 62.1 |
|                                                          | ObjNet             | 83.1         | 73.2  | 47.8 | 56.3          | 41.4      | -      | 73.3       | 52.6          | 65.9 |
|                                                          | IN-Cartoon         | 91.1         | 71.9  | 43.3 | 56.5          | 42.2      | 47.5   | -          | 58.5          | 69.9 |
|                                                          | IN-Drawing         | 87.6         | 71.9  | 42.0 | 57.5          | 43.5      | 47.0   | 79.7       | -             | 70.0 |
|                                                          | IN-C               | 99.2         | 65.0  | 35.2 | 50.3          | 37.0      | 39.5   | 93.8       | 76.1          | -    |
| Visual Prompt<br>(Bahng et al., 2022)                    | IN-V2              | 81.3         | -     | 37.2 | 53.6          | 38.8      | 48.8   | 67.8       | 42.8          | 56.9 |
|                                                          | IN-A               | 78.5         | 67.3  | -    | 52.3          | 35.0      | 51.5   | 63.1       | 34.6          | 51.1 |
|                                                          | IN-R               | 74.9         | 64.1  | 27.4 | -             | 47.4      | 43.3   | 62.2       | 49.2          | 46.4 |
|                                                          | IN-Sketch          | 78.3         | 67.4  | 28.0 | 64.2          | -         | 45.0   | 67.2       | 52.7          | 51.7 |
|                                                          | ObjNet             | 75.0         | 64.2  | 34.8 | 43.9          | 30.4      | -      | 54.1       | 27.8          | 42.5 |
|                                                          | IN-Cartoon         | 80.8         | 68.6  | 31.8 | 54.3          | 39.3      | 45.2   | -          | 45.4          | 53.1 |
|                                                          | IN-Drawing         | 79.3         | 68.3  | 27.9 | 55.1          | 40.1      | 44.6   | 67.8       | -             | 54.5 |
|                                                          | IN-C               | 82.3         | 71.3  | 38.8 | 53.3          | 38.9      | 48.1   | 70.6       | 53.7          | -    |
| LoRA<br>(Hu et al., 2021)                                | IN-V2              | 84.6         | -     | 44.9 | 57.1          | 43.4      | 49.9   | 75.2       | 55.0          | 67.2 |
|                                                          | IN-A               | 84.3         | 74.5  | -    | 57.9          | 42.8      | 52.8   | 74.7       | 54.2          | 67.8 |
|                                                          | IN-R               | 84.2         | 74.1  | 47.6 | -             | 48.5      | 52.4   | 75.4       | 58.8          | 67.0 |
|                                                          | IN-Sketch          | 84.0         | 73.7  | 44.9 | 66.5          | -         | 51.3   | 75.6       | 60.7          | 66.9 |
|                                                          | ObjNet             | 84.2         | 74.3  | 49.5 | 58.0          | 42.4      | -      | 74.5       | 53.6          | 67.2 |
|                                                          | IN-Cartoon         | 84.5         | 73.8  | 44.9 | 58.3          | 43.7      | 50.0   | -          | 55.5          | 66.4 |
|                                                          | IN-Drawing         | 84.0         | 73.8  | 43.9 | 61.2          | 47.3      | 49.7   | 75.3       | -             | 67.1 |
|                                                          | IN-C               | 64.8         | 52.2  | 7.9  | 36.4          | 24.9      | 24.6   | 39.4       | 18.9          | -    |
| EWC<br>(Kirkpatrick et al., 2017)                        | IN-V2              | 84.0         | -     | 52.3 | 59.4          | 43.6      | 52.1   | 73.2       | 54.0          | 67.7 |
|                                                          | IN-A               | 81.3         | 71.3  | -    | 56.8          | 41.8      | 52.4   | 69.8       | 46.8          | 65.8 |
|                                                          | IN-R               | 80.9         | 70.5  | 47.1 | -             | 56.2      | 48.4   | 72.3       | 63.0          | 63.9 |
|                                                          | IN-Sketch          | 83.1         | 72.9  | 44.8 | 70.3          | -         | 50.1   | 75.4       | 63.9          | 66.2 |
|                                                          | ObjNet             | 80.8         | 70.6  | 49.9 | 53.3          | 40.1      | -      | 67.4       | 44.5          | 63.5 |
|                                                          | IN-Cartoon         | 84.6         | 72.2  | 45.0 | 58.5          | 43.6      | 49.2   | -          | 57.4          | 63.9 |
|                                                          | IN-Drawing         | 84.2         | 73.1  | 42.2 | 59.3          | 45.8      | 49.0   | 75.4       | -             | 65.9 |
|                                                          | IN-C               | 85.4         | 74.2  | 46.5 | 56.4          | 42.8      | 49.6   | 75.9       | 62.5          | -    |
| LwF<br>(Li & Hoiem, 2017)                                | IN-V2              | 83.6         | -     | 42.9 | 56.3          | 40.7      | 48.2   | 73.8       | 53.5          | 66.0 |
|                                                          | IN-A               | 82.8         | 72.1  | -    | 55.5          | 39.4      | 48.4   | 72.2       | 51.6          | 64.1 |
|                                                          | IN-R               | 82.5         | 71.9  | 39.3 | -             | 54.3      | 46.5   | 74.1       | 58.7          | 64.1 |
|                                                          | IN-Sketch          | 80.3         | 70.1  | 33.2 | 69.2          | -         | 46.6   | 71.7       | 56.5          | 61.5 |
|                                                          | ObjNet             | 81.9         | 71.4  | 42.2 | 53.6          | 38.4      | -      | 70.7       | 45.9          | 62.2 |
|                                                          | IN-Cartoon         | 96.6         | 71.8  | 37.9 | 57.1          | 41.7      | 47.0   | -          | 62.0          | 71.7 |
|                                                          | IN-Drawing         | 94.3         | 69.9  | 31.1 | 57.5          | 43.6      | 44.1   | 83.6       | -             | 68.5 |
|                                                          | IN-C               | 99.9         | 69.2  | 27.8 | 53.9          | 38.5      | 41.8   | 97.5       | 79.4          | -    |
| LP-FT<br>(Kumar et al., 2022)                            | IN-V2              | 82.3         | -     | 50.8 | 56.9          | 41.9      | 50.3   | 72.4       | 52.5          | 65.6 |
|                                                          | IN-A               | 80.9         | 70.9  | -    | 54.5          | 40.2      | 51.0   | 69.3       | 45.7          | 63.2 |
|                                                          | IN-R               | 76.3         | 66.2  | 35.3 | -             | 49.0      | 45.3   | 66.5       | 52.8          | 57.0 |
|                                                          | IN-Sketch          | 76.9         | 66.7  | 35.1 | 69.7          | -         | 46.8   | 68.0       | 53.6          | 58.5 |
|                                                          | ObjNet             | 79.6         | 68.9  | 42.2 | 52.5          | 36.1      | -      | 67.4       | 43.4          | 59.9 |
|                                                          | IN-Cartoon         | 96.0         | 69.6  | 40.0 | 55.6          | 40.9      | 47.2   | -          | 60.9          | 68.6 |
|                                                          | IN-Drawing         | 92.8         | 67.5  | 31.0 | 56.4          | 42.5      | 43.7   | 81.7       | -             | 66.9 |
|                                                          | IN-C               | 99.9         | 63.3  | 27.6 | 49.3          | 34.8      | 37.1   | 97.2       | 83.0          | -    |
| WiSE-FT<br>(Wortsman et al., 2022b)                      | IN-V2              | 84.1         | -     | 50.0 | 58.5          | 43.5      | 51.4   | 74.6       | 54.9          | 68.0 |
|                                                          | IN-A               | 83.0         | 73.1  | -    | 57.2          | 42.2      | 52.5   | 72.6       | 53.3          | 66.5 |
|                                                          | IN-R               | 82.8         | 72.8  | 47.7 | -             | 56.8      | 50.4   | 75.4       | 63.7          | 66.9 |
|                                                          | IN-Sketch          | 82.3         | 72.9  | 40.5 | 70.7          | -         | 49.8   | 74.5       | 62.5          | 65.1 |
|                                                          | ObjNet             | 83.2         | 72.9  | 48.0 | 56.1          | 41.9      | -      | 73.2       | 50.0          | 65.6 |
|                                                          | IN-Cartoon         | 92.0         | 72.8  | 45.5 | 58.4          | 44.2      | 50.1   | -          | 61.8          | 68.6 |
|                                                          | IN-Drawing         | 90.2         | 73.0  | 41.1 | 59.0          | 46.4      | 49.1   | 80.3       | -             | 69.2 |
|                                                          | IN-C               | 96.5         | 71.7  | 36.9 | 55.8          | 41.2      | 46.4   | 92.3       | 73.9          | -    |
| Model Soup<br>PRE-FT-EWC-LwF<br>(Wortsman et al., 2022a) | IN-V2              | 84.2         | -     | 49.9 | 58.6          | 43.7      | 51.1   | 74.7       | 55.3          | 68.0 |
|                                                          | IN-A               | 83.5         | 73.7  | -    | 57.7          | 42.9      | 52.3   | 73.4       | 53.9          | 66.9 |
|                                                          | IN-R               | 83.5         | 73.6  | 48.4 | -             | 57.2      | 50.5   | 76.1       | 64.4          | 67.4 |
|                                                          | IN-Sketch          | 82.7         | 72.8  | 41.6 | 71.0          | -         | 49.8   | 75.0       | 62.6          | 65.6 |
|                                                          | ObjNet             | 83.3         | 73.1  | 49.4 | 56.0          | 42.1      | -      | 72.8       | 49.7          | 65.6 |
|                                                          | IN-Cartoon         | 91.7         | 73.0  | 44.9 | 58.8          | 44.3      | 49.8   | -          | 61.9          | 69.2 |
|                                                          | IN-Drawing         | 90.2         | 73.0  | 40.9 | 59.7          | 46.8      | 48.6   | 80.7       | -             | 69.6 |
|                                                          | IN-C               | 96.5         | 72.9  | 41.0 | 58.0          | 43.6      | 47.7   | 92.1       | 75.5          | -    |



Table S6: The accuracy on each OOD dataset after fine-tuning LAION-2B pretrained ViT-B/16 on the downstream datasets with various methods. Note that ImageNet-Drawing, ImageNet-Cartoon, and ImageNet-C are generated from the ImageNet validation set. Green and red indicate relative performance increases and decreases, respectively, compared to the pretrained model. Bold indicates the best performance on each evaluation dataset.

| Method                                                   | Downstream Dataset | $D_{pre}$ IN | IN-V2       | IN-A        | IN-R        | IN-Sketch   | ObjNet      | IN-Cartoon  | IN-Drawing  | IN-C        |
|----------------------------------------------------------|--------------------|--------------|-------------|-------------|-------------|-------------|-------------|-------------|-------------|-------------|
| Pretrained                                               |                    | 85.5         | <b>75.6</b> | 41.5        | 68.8        | 55.4        | 51.1        | 78.2        | 58.4        | <b>63.0</b> |
| FT                                                       | IN-V2              | 59.0         | -           | 8.1         | 25.6        | 12.2        | 21.1        | 36.6        | 12.2        | 24.5        |
|                                                          | IN-A               | 28.7         | 20.4        | -           | 11.9        | 4.5         | 10.3        | 14.9        | 4.0         | 8.5         |
|                                                          | IN-R               | 47.1         | 36.4        | 7.2         | -           | 29.5        | 19.4        | 33.7        | 17.0        | 21.4        |
|                                                          | IN-Sketch          | 29.1         | 20.3        | 2.6         | 37.8        | -           | 9.2         | 20.4        | 8.0         | 9.7         |
|                                                          | ObjNet             | 39.4         | 30.5        | 4.8         | 16.4        | 6.7         | -           | 20.2        | 4.7         | 13.5        |
|                                                          | IN-Cartoon         | 90.2         | 52.8        | 9.9         | 36.4        | 22.0        | 27.6        | -           | 29.1        | 32.6        |
|                                                          | IN-Drawing         | 62.0         | 37.0        | 5.0         | 29.7        | 19.1        | 15.4        | 48.6        | -           | 22.5        |
|                                                          | IN-C               | 99.9         | 54.4        | 8.2         | 40.8        | 27.0        | 24.3        | 98.6        | 85.1        | -           |
| Linear Probing                                           | IN-V2              | 84.9         | -           | 42.0        | 68.7        | 54.0        | 50.2        | 77.4        | 57.5        | 62.3        |
|                                                          | IN-A               | 84.5         | 74.9        | -           | 68.9        | 53.6        | <b>53.2</b> | 76.3        | 54.2        | 62.7        |
|                                                          | IN-R               | 82.8         | 72.6        | 37.4        | -           | 57.6        | 47.9        | 75.7        | 60.5        | 61.2        |
|                                                          | IN-Sketch          | 82.5         | 72.8        | 37.9        | <b>74.8</b> | -           | 49.1        | 76.0        | 59.6        | 60.7        |
|                                                          | ObjNet             | 84.2         | 74.5        | <b>44.3</b> | 66.9        | 52.5        | -           | 74.6        | 53.7        | 61.2        |
|                                                          | IN-Cartoon         | 85.7         | 72.6        | 36.7        | 69.8        | 52.9        | 47.5        | -           | 57.8        | 59.7        |
|                                                          | IN-Drawing         | 83.8         | 71.1        | 27.7        | 67.0        | 51.7        | 43.9        | 76.0        | -           | 57.7        |
|                                                          | IN-C               | 97.6         | 67.8        | 25.9        | 61.4        | 47.5        | 40.2        | 93.2        | 78.8        | -           |
| Visual Prompt<br>(Bahng et al., 2022)                    | IN-V2              | 82.8         | -           | 32.3        | 64.4        | 51.4        | 49.5        | 72.3        | 47.0        | 54.4        |
|                                                          | IN-A               | 80.9         | 70.9        | -           | 64.1        | 49.0        | 53.0        | 69.5        | 36.8        | 50.7        |
|                                                          | IN-R               | 78.7         | 68.0        | 30.1        | -           | 54.7        | 45.9        | 68.5        | 49.5        | 49.4        |
|                                                          | IN-Sketch          | 81.4         | 70.6        | 28.6        | 69.5        | -           | 48.9        | 71.6        | 49.8        | 50.9        |
|                                                          | ObjNet             | 77.9         | 66.8        | 30.1        | 55.2        | 41.1        | -           | 61.5        | 26.8        | 42.4        |
|                                                          | IN-Cartoon         | 82.4         | 71.0        | 30.9        | 64.0        | 49.3        | 47.8        | -           | 43.7        | 48.7        |
|                                                          | IN-Drawing         | 81.6         | 70.8        | 26.6        | 63.3        | 49.3        | 47.4        | 69.9        | -           | 50.2        |
|                                                          | IN-C               | 83.8         | 73.3        | 34.1        | 66.6        | 52.2        | 49.2        | 74.5        | 58.9        | -           |
| LoRA<br>(Hu et al., 2021)                                | IN-V2              | 85.0         | -           | 40.8        | 68.6        | 53.9        | 50.6        | 77.3        | 57.8        | 62.0        |
|                                                          | IN-A               | 84.5         | 75.0        | -           | 68.6        | 53.6        | 52.8        | 76.2        | 53.1        | 62.2        |
|                                                          | IN-R               | 82.7         | 72.2        | 36.9        | -           | 58.2        | 47.6        | 75.8        | 60.2        | 61.2        |
|                                                          | IN-Sketch          | 82.9         | 72.5        | 35.2        | 74.6        | -           | 48.4        | 76.3        | 60.2        | 60.9        |
|                                                          | ObjNet             | 84.1         | 74.0        | 42.5        | 67.3        | 52.2        | -           | 72.8        | 51.6        | 59.7        |
|                                                          | IN-Cartoon         | 83.7         | 72.6        | 35.9        | 69.5        | 53.3        | 47.0        | -           | 57.3        | 58.4        |
|                                                          | IN-Drawing         | 81.7         | 70.9        | 28.2        | 67.1        | 52.1        | 44.8        | 74.4        | -           | 55.8        |
|                                                          | IN-C               | 78.9         | 67.8        | 20.3        | 61.4        | 47.3        | 38.7        | 68.8        | 38.3        | -           |
| EWC<br>(Kirkpatrick et al., 2017)                        | IN-V2              | 80.2         | -           | 26.4        | 49.4        | 31.9        | 41.2        | 65.2        | 38.0        | 51.4        |
|                                                          | IN-A               | 69.6         | 60.3        | -           | 34.8        | 19.7        | 38.1        | 47.6        | 19.7        | 39.9        |
|                                                          | IN-R               | 81.5         | 71.2        | 38.3        | -           | <b>58.4</b> | 47.8        | 73.6        | 58.3        | 58.7        |
|                                                          | IN-Sketch          | 70.5         | 57.0        | 18.4        | 60.6        | -           | 28.0        | 64.0        | 45.8        | 41.7        |
|                                                          | ObjNet             | 78.1         | 67.0        | 28.5        | 45.5        | 30.7        | -           | 59.6        | 28.5        | 48.0        |
|                                                          | IN-Cartoon         | 84.0         | 71.4        | 34.1        | 64.5        | 47.2        | 46.9        | -           | 52.3        | 52.6        |
|                                                          | IN-Drawing         | 80.9         | 67.7        | 24.8        | 62.8        | 46.8        | 39.5        | 72.1        | -           | 50.4        |
|                                                          | IN-C               | 85.5         | 74.3        | 34.3        | 66.8        | 51.1        | 48.2        | 77.6        | 64.5        | -           |
| LwF<br>(Li & Hoiem, 2017)                                | IN-V2              | 63.5         | -           | 8.7         | 28.0        | 14.7        | 22.7        | 41.0        | 12.2        | 28.0        |
|                                                          | IN-A               | 40.1         | 30.0        | -           | 15.1        | 5.7         | 14.5        | 20.6        | 6.1         | 13.6        |
|                                                          | IN-R               | 56.9         | 46.1        | 7.8         | -           | 33.5        | 23.1        | 41.6        | 22.2        | 26.9        |
|                                                          | IN-Sketch          | 33.3         | 24.7        | 2.6         | 39.0        | -           | 11.0        | 22.5        | 8.9         | 11.5        |
|                                                          | ObjNet             | 50.6         | 39.2        | 6.3         | 19.8        | 9.1         | -           | 28.4        | 6.3         | 19.2        |
|                                                          | IN-Cartoon         | 93.8         | 60.8        | 12.3        | 43.9        | 28.6        | 32.2        | -           | 37.7        | 42.0        |
|                                                          | IN-Drawing         | 70.8         | 42.2        | 5.6         | 37.8        | 26.9        | 17.1        | 58.5        | -           | 28.8        |
|                                                          | IN-C               | 99.9         | 60.4        | 8.9         | 47.8        | 32.8        | 29.1        | 98.2        | 82.6        | -           |
| LP-FT<br>(Kumar et al., 2022)                            | IN-V2              | 59.5         | -           | 8.0         | 26.4        | 12.7        | 21.2        | 37.6        | 11.3        | 24.3        |
|                                                          | IN-A               | 34.5         | 27.2        | -           | 13.6        | 5.2         | 13.6        | 17.6        | 4.7         | 11.4        |
|                                                          | IN-R               | 49.1         | 38.6        | 7.1         | -           | 30.2        | 20.3        | 34.5        | 18.5        | 22.5        |
|                                                          | IN-Sketch          | 30.2         | 22.9        | 2.3         | 38.7        | -           | 10.6        | 21.1        | 8.0         | 10.5        |
|                                                          | ObjNet             | 44.2         | 33.6        | 5.7         | 17.5        | 7.0         | -           | 23.4        | 4.8         | 15.4        |
|                                                          | IN-Cartoon         | 90.9         | 53.5        | 10.7        | 37.6        | 23.0        | 27.7        | -           | 31.2        | 32.3        |
|                                                          | IN-Drawing         | 67.8         | 39.0        | 5.2         | 34.2        | 22.5        | 16.2        | 55.9        | -           | 24.4        |
|                                                          | IN-C               | <b>99.9</b>  | 51.1        | 6.8         | 38.2        | 23.5        | 20.9        | <b>98.9</b> | <b>87.4</b> | -           |
| WiSE-FT<br>(Wortsman et al., 2022b)                      | IN-V2              | 76.3         | -           | 17.9        | 38.9        | 22.2        | 34.7        | 58.1        | 23.5        | 43.7        |
|                                                          | IN-A               | 59.8         | 48.0        | -           | 24.2        | 10.8        | 22.8        | 34.4        | 10.0        | 26.7        |
|                                                          | IN-R               | 74.1         | 62.1        | 18.2        | -           | 41.1        | 36.2        | 60.9        | 38.1        | 43.3        |
|                                                          | IN-Sketch          | 58.6         | 47.0        | 7.2         | 48.0        | -           | 21.4        | 43.7        | 20.6        | 25.4        |
|                                                          | ObjNet             | 74.7         | 62.2        | 18.3        | 40.0        | 23.3        | -           | 55.4        | 21.4        | 42.3        |
|                                                          | IN-Cartoon         | 88.5         | 69.5        | 26.3        | 54.7        | 39.0        | 42.6        | -           | 49.8        | 53.0        |
|                                                          | IN-Drawing         | 81.1         | 61.7        | 15.6        | 53.6        | 41.0        | 30.8        | 70.5        | -           | 45.9        |
|                                                          | IN-C               | 94.2         | 67.1        | 19.2        | 58.2        | 42.2        | 39.3        | 90.0        | 74.6        | -           |
| Model Soup<br>PRE-FT-EWC-LwF<br>(Wortsman et al., 2022a) | IN-V2              | 78.1         | -           | 20.5        | 44.2        | 27.8        | 37.3        | 61.3        | 31.2        | 46.2        |
|                                                          | IN-A               | 68.5         | 56.6        | -           | 31.3        | 16.0        | 30.6        | 45.7        | 15.9        | 35.0        |
|                                                          | IN-R               | 77.0         | 65.3        | 22.5        | -           | 46.9        | 39.7        | 65.4        | 45.6        | 47.8        |
|                                                          | IN-Sketch          | 60.8         | 49.0        | 8.0         | 50.9        | -           | 23.4        | 46.6        | 23.5        | 27.5        |
|                                                          | ObjNet             | 77.0         | 65.2        | 21.6        | 43.0        | 27.1        | -           | 58.5        | 25.4        | 45.0        |
|                                                          | IN-Cartoon         | 88.7         | 71.1        | 27.9        | 58.4        | 43.2        | 43.9        | -           | 54.5        | 54.5        |
|                                                          | IN-Drawing         | 81.3         | 62.3        | 16.2        | 57.3        | 44.9        | 31.4        | 72.2        | -           | 47.0        |
|                                                          | IN-C               | 94.3         | 69.5        | 22.2        | 62.1        | 47.2        | 40.6        | 90.8        | 77.5        | -           |



Table S7: The accuracy on each OOD dataset after fine-tuning OpenAI CLIP ViT-B/16 on the downstream datasets with various methods. Note that ImageNet-Drawing, ImageNet-Cartoon, and ImageNet-C are generated from the ImageNet validation set. Green and red indicate relative performance increases and decreases, respectively, compared to the pretrained model. Bold indicates the best performance on each evaluation dataset.

| Method                                                   | Downstream Dataset | $D_{pre}$ IN | IN-V2 | IN-A        | Realistic OOD<br>IN-R | IN-Sketch   | ObjNet      | Synthetic OOD<br>IN-Cartoon | IN-Drawing  | IN-C        |
|----------------------------------------------------------|--------------------|--------------|-------|-------------|-----------------------|-------------|-------------|-----------------------------|-------------|-------------|
| Pretrained                                               |                    | 85.3         | 75.7  | 47.3        | 65.9                  | 50.9        | 50.7        | 76.3                        | 55.7        | <b>62.6</b> |
| FT                                                       | IN-V2              | 60.8         | -     | 9.7         | 24.2                  | 10.1        | 22.0        | 36.4                        | 13.0        | 25.7        |
|                                                          | IN-A               | 29.8         | 23.3  | -           | 10.5                  | 4.1         | 11.4        | 14.3                        | 4.1         | 8.9         |
|                                                          | IN-R               | 47.9         | 37.9  | 7.9         | -                     | 29.4        | 19.3        | 34.4                        | 20.1        | 22.2        |
|                                                          | IN-Sketch          | 24.4         | 18.0  | 1.9         | 34.6                  | -           | 8.2         | 17.3                        | 7.5         | 7.2         |
|                                                          | ObjNet             | 36.0         | 26.7  | 4.9         | 12.5                  | 5.4         | -           | 18.3                        | 3.7         | 10.6        |
|                                                          | IN-Cartoon         | 92.3         | 52.7  | 10.5        | 34.0                  | 18.1        | 24.5        | -                           | 33.9        | 32.8        |
|                                                          | IN-Drawing         | 67.3         | 36.1  | 5.0         | 29.5                  | 17.7        | 14.2        | 53.0                        | -           | 23.0        |
|                                                          | IN-C               | <b>99.9</b>  | 51.0  | 7.0         | 35.4                  | 19.0        | 20.8        | <b>98.2</b>                 | <b>84.0</b> | -           |
| Linear Probing                                           | IN-V2              | 84.7         | -     | 48.0        | 65.6                  | 50.3        | 50.9        | 75.3                        | 53.9        | 61.6        |
|                                                          | IN-A               | 84.1         | 74.5  | -           | 66.5                  | 49.1        | <b>53.6</b> | 74.1                        | 51.9        | 62.3        |
|                                                          | IN-R               | 82.3         | 72.9  | 42.0        | -                     | 54.7        | 48.5        | 73.8                        | 58.5        | 59.9        |
|                                                          | IN-Sketch          | 82.0         | 72.6  | 41.5        | 72.4                  | -           | 48.8        | 74.3                        | 57.6        | 58.0        |
|                                                          | ObjNet             | 83.9         | 74.5  | <b>52.0</b> | 65.5                  | 49.0        | -           | 73.7                        | 51.2        | 60.1        |
|                                                          | IN-Cartoon         | 85.0         | 73.1  | 40.7        | 65.6                  | 48.9        | 46.5        | -                           | 53.9        | 56.3        |
|                                                          | IN-Drawing         | 83.1         | 71.4  | 32.2        | 64.6                  | 47.9        | 43.9        | 75.3                        | -           | 54.7        |
|                                                          | IN-C               | <b>97.0</b>  | 68.7  | 32.3        | 59.1                  | 44.4        | 40.3        | <b>90.6</b>                 | <b>74.2</b> | -           |
| Visual Prompt<br>(Bahng et al., 2022)                    | IN-V2              | 82.4         | -     | 38.2        | 60.5                  | 46.4        | 48.3        | 68.2                        | 42.5        | 53.6        |
|                                                          | IN-A               | 80.4         | 70.5  | -           | 62.1                  | 45.1        | 51.9        | 66.2                        | 35.1        | 50.5        |
|                                                          | IN-R               | 79.3         | 68.8  | 38.2        | -                     | 51.2        | 46.5        | 66.9                        | 46.6        | 47.9        |
|                                                          | IN-Sketch          | 81.2         | 70.5  | 35.6        | 67.3                  | -           | 47.9        | 69.0                        | 48.9        | 50.8        |
|                                                          | ObjNet             | 77.6         | 67.0  | 37.7        | 53.0                  | 38.9        | -           | 57.8                        | 25.2        | 41.1        |
|                                                          | IN-Cartoon         | 81.8         | 70.1  | 35.7        | 60.7                  | 44.4        | 45.5        | -                           | 40.2        | 46.2        |
|                                                          | IN-Drawing         | 80.5         | 69.5  | 27.2        | 60.6                  | 45.9        | 43.2        | 66.9                        | -           | 46.8        |
|                                                          | IN-C               | 83.1         | 73.1  | 41.5        | 64.4                  | 49.3        | 49.5        | 71.2                        | 54.6        | -           |
| LoRA<br>(Hu et al., 2021)                                | IN-V2              | 84.7         | -     | 47.4        | 65.7                  | 50.3        | 51.4        | 75.3                        | 53.7        | 61.5        |
|                                                          | IN-A               | 84.0         | 74.6  | -           | 66.4                  | 48.9        | 53.5        | 73.8                        | 51.7        | 62.0        |
|                                                          | IN-R               | 81.9         | 71.9  | 40.9        | -                     | 54.4        | 47.9        | 73.3                        | 58.1        | 59.5        |
|                                                          | IN-Sketch          | 82.7         | 73.1  | 40.2        | <b>72.7</b>           | -           | 48.4        | 74.9                        | 59.1        | 58.6        |
|                                                          | ObjNet             | 83.3         | 74.0  | 49.5        | 65.6                  | 48.2        | -           | 71.3                        | 48.6        | 57.9        |
|                                                          | IN-Cartoon         | 83.4         | 72.8  | 39.6        | 65.4                  | 48.7        | 46.7        | -                           | 53.0        | 54.6        |
|                                                          | IN-Drawing         | 81.4         | 71.3  | 31.8        | 64.0                  | 48.1        | 43.9        | 73.1                        | -           | 52.5        |
|                                                          | IN-C               | 79.5         | 69.6  | 26.9        | 59.6                  | 42.7        | 41.5        | 69.3                        | 33.6        | -           |
| EWC<br>(Kirkpatrick et al., 2017)                        | IN-V2              | 80.6         | -     | 33.0        | 48.4                  | 29.3        | 40.3        | 64.2                        | 40.7        | 52.9        |
|                                                          | IN-A               | 73.8         | 62.9  | -           | 40.9                  | 23.5        | 39.3        | 52.2                        | 27.0        | 45.3        |
|                                                          | IN-R               | 80.5         | 71.2  | 43.5        | -                     | <b>55.4</b> | 46.7        | 71.5                        | 56.3        | 58.0        |
|                                                          | IN-Sketch          | 58.5         | 48.2  | 17.7        | 49.3                  | -           | 25.4        | 53.7                        | 33.6        | 32.8        |
|                                                          | ObjNet             | 77.8         | 67.1  | 33.1        | 43.6                  | 24.8        | -           | 57.0                        | 23.2        | 46.6        |
|                                                          | IN-Cartoon         | 84.1         | 71.4  | 37.4        | 61.2                  | 42.7        | 45.0        | -                           | 49.5        | 49.4        |
|                                                          | IN-Drawing         | 80.5         | 67.7  | 27.7        | 59.2                  | 41.7        | 37.6        | 70.6                        | -           | 49.0        |
|                                                          | IN-C               | 86.7         | 74.2  | 41.5        | 65.1                  | 47.8        | 47.0        | 77.3                        | <b>64.1</b> | -           |
| LwF<br>(Li & Hoiem, 2017)                                | IN-V2              | 65.3         | -     | 10.2        | 28.0                  | 12.6        | 24.4        | 42.3                        | 14.3        | 28.8        |
|                                                          | IN-A               | 42.3         | 33.6  | -           | 14.8                  | 5.1         | 16.1        | 21.4                        | 7.0         | 14.7        |
|                                                          | IN-R               | 57.9         | 46.6  | 8.0         | -                     | 33.2        | 22.3        | 41.9                        | 25.4        | 27.7        |
|                                                          | IN-Sketch          | 26.8         | 20.1  | 2.0         | 35.8                  | -           | 9.2         | 19.2                        | 9.1         | 8.8         |
|                                                          | ObjNet             | 52.4         | 40.1  | 6.1         | 18.2                  | 7.6         | -           | 27.4                        | 6.4         | 18.6        |
|                                                          | IN-Cartoon         | 95.0         | 60.1  | 13.1        | 40.3                  | 23.5        | 28.6        | -                           | 42.5        | 41.4        |
|                                                          | IN-Drawing         | 75.6         | 43.7  | 5.9         | 36.0                  | 23.5        | 17.3        | 61.5                        | -           | 30.3        |
|                                                          | IN-C               | <b>99.5</b>  | 65.7  | 12.4        | 51.0                  | 34.9        | 33.5        | <b>96.1</b>                 | <b>73.7</b> | -           |
| LP-FT<br>(Kumar et al., 2022)                            | IN-V2              | 60.9         | -     | 9.6         | 24.9                  | 9.7         | 22.3        | 36.8                        | 12.4        | 25.8        |
|                                                          | IN-A               | 33.6         | 25.8  | -           | 11.7                  | 4.4         | 13.8        | 17.3                        | 4.4         | 10.4        |
|                                                          | IN-R               | 50.2         | 39.9  | 8.3         | -                     | 29.9        | 21.4        | 35.5                        | 20.1        | 23.3        |
|                                                          | IN-Sketch          | 23.8         | 17.6  | 2.2         | 34.8                  | -           | 7.6         | 17.2                        | 7.8         | 7.3         |
|                                                          | ObjNet             | 40.3         | 30.6  | 5.0         | 13.9                  | 6.0         | -           | 18.9                        | 4.4         | 12.7        |
|                                                          | IN-Cartoon         | 91.6         | 51.8  | 10.4        | 33.6                  | 18.2        | 24.1        | -                           | 31.7        | 30.6        |
|                                                          | IN-Drawing         | 77.5         | 43.4  | 5.8         | 32.4                  | 18.2        | 17.9        | 62.2                        | -           | 27.7        |
|                                                          | IN-C               | <b>99.9</b>  | 53.2  | 7.2         | 38.6                  | 22.3        | 21.7        | <b>98.6</b>                 | <b>87.6</b> | -           |
| WiSE-FT<br>(Wortsman et al., 2022b)                      | IN-V2              | 79.1         | -     | 26.3        | 43.1                  | 23.9        | 38.0        | 62.9                        | 30.9        | 47.9        |
|                                                          | IN-A               | 72.2         | 60.0  | -           | 32.5                  | 15.9        | 34.1        | 49.0                        | 20.3        | 39.1        |
|                                                          | IN-R               | 77.1         | 65.6  | 25.8        | -                     | 45.0        | 39.5        | 65.8                        | 47.2        | 48.5        |
|                                                          | IN-Sketch          | 55.4         | 44.4  | 8.6         | 47.0                  | -           | 21.6        | 45.1                        | 24.7        | 25.5        |
|                                                          | ObjNet             | 76.2         | 64.2  | 23.2        | 38.6                  | 21.8        | -           | 57.3                        | 21.8        | 41.7        |
|                                                          | IN-Cartoon         | 89.1         | 69.9  | 28.4        | 52.6                  | 35.1        | 40.7        | -                           | 52.0        | 52.4        |
|                                                          | IN-Drawing         | 82.0         | 61.9  | 18.0        | 51.5                  | 37.5        | 30.5        | 71.9                        | -           | 47.4        |
|                                                          | IN-C               | <b>94.1</b>  | 67.4  | 21.0        | 54.9                  | 37.6        | 36.7        | <b>90.2</b>                 | <b>76.0</b> | -           |
| Model Soup<br>PRE-FT-EWC-LwF<br>(Wortsman et al., 2022a) | IN-V2              | 79.7         | -     | 27.8        | 46.7                  | 28.1        | 39.2        | 64.5                        | 34.7        | 48.7        |
|                                                          | IN-A               | 73.1         | 61.6  | -           | 36.0                  | 19.0        | 35.7        | 52.3                        | 23.1        | 39.8        |
|                                                          | IN-R               | 78.3         | 67.4  | 28.5        | -                     | 48.2        | 41.2        | 67.6                        | 49.9        | 50.4        |
|                                                          | IN-Sketch          | 55.1         | 44.8  | 9.0         | 48.2                  | -           | 21.9        | 45.7                        | 26.0        | 26.3        |
|                                                          | ObjNet             | 77.8         | 66.1  | 25.6        | 42.2                  | 26.3        | -           | 59.5                        | 24.5        | 44.2        |
|                                                          | IN-Cartoon         | 89.0         | 71.3  | 29.7        | 55.5                  | 38.7        | 41.2        | -                           | 55.1        | 53.8        |
|                                                          | IN-Drawing         | 82.7         | 63.3  | 18.9        | 54.1                  | 39.9        | 31.2        | 72.8                        | -           | 48.6        |
|                                                          | IN-C               | <b>93.2</b>  | 70.9  | 26.2        | 59.4                  | 42.6        | 40.3        | <b>89.1</b>                 | <b>74.9</b> | -           |

Table S8: The accuracy on each OOD dataset after fine-tuning ImageNet-1K with AugReg pretrained ViT-B/32 on the downstream datasets with various methods. Note that ImageNet-Drawing, ImageNet-Cartoon, and ImageNet-C are generated from images in the ImageNet validation set. Green and red indicate relative performance increases and decreases, respectively, compared to the pretrained model. Bold indicates the best performance on each evaluation dataset.

| Method                                                   | Downstream Dataset | $D_{pre}$<br>IN | IN-V2 | IN-A | Realistic OOD |           |      | ObjNet | IN-Cartoon | Synthetic OOD |      |
|----------------------------------------------------------|--------------------|-----------------|-------|------|---------------|-----------|------|--------|------------|---------------|------|
|                                                          |                    | IN              |       |      | IN-R          | IN-Sketch |      |        |            | IN-Drawing    | IN-C |
| Pretrained                                               |                    | 74.9            | 61.0  | 8.0  | 37.5          | 27.1      | 28.0 | 65.2   | 40.5       | 53.5          |      |
| FT                                                       | IN-V2              | 73.6            | -     | 12.8 | 41.0          | 28.4      | 31.4 | 63.1   | 40.9       | 53.4          |      |
|                                                          | IN-A               | 66.5            | 54.1  | -    | 35.4          | 24.0      | 28.0 | 53.5   | 31.9       | 47.5          |      |
|                                                          | IN-R               | 64.7            | 52.8  | 11.0 | -             | 43.4      | 26.5 | 57.2   | 47.0       | 47.0          |      |
|                                                          | IN-Sketch          | 70.8            | 57.9  | 8.9  | 55.8          | -         | 28.2 | 63.1   | 47.2       | 51.1          |      |
|                                                          | ObjNet             | 68.5            | 55.9  | 12.7 | 33.7          | 23.3      | -    | 52.4   | 29.1       | 47.8          |      |
|                                                          | IN-Cartoon         | 82.7            | 58.0  | 11.2 | 39.8          | 28.3      | 28.6 | -      | 41.8       | 50.1          |      |
|                                                          | IN-Drawing         | 77.1            | 56.9  | 9.0  | 40.8          | 29.1      | 26.5 | 63.2   | -          | 52.8          |      |
|                                                          | IN-C               | 99.6            | 54.8  | 8.1  | 35.3          | 23.5      | 24.1 | 93.5   | 72.7       | -             |      |
| Linear Probing                                           | IN-V2              | 74.8            | -     | 8.3  | 37.8          | 27.1      | 28.1 | 65.1   | 40.5       | 53.5          |      |
|                                                          | IN-A               | 73.8            | 60.3  | -    | 38.0          | 26.7      | 29.6 | 64.1   | 40.2       | 53.2          |      |
|                                                          | IN-R               | 74.0            | 60.4  | 8.9  | -             | 29.7      | 29.1 | 65.6   | 43.4       | 52.8          |      |
|                                                          | IN-Sketch          | 72.3            | 58.9  | 8.5  | 47.6          | -         | 28.8 | 64.8   | 43.4       | 51.0          |      |
|                                                          | ObjNet             | 74.3            | 60.4  | 9.9  | 38.7          | 27.4      | -    | 64.8   | 41.3       | 53.3          |      |
|                                                          | IN-Cartoon         | 77.7            | 60.5  | 8.2  | 39.6          | 27.2      | 28.6 | -      | 44.5       | 54.2          |      |
|                                                          | IN-Drawing         | 75.7            | 59.8  | 8.5  | 41.7          | 28.3      | 28.3 | 67.1   | -          | 54.4          |      |
|                                                          | IN-C               | 97.9            | 54.3  | 7.9  | 35.2          | 23.2      | 21.5 | 88.5   | 63.6       | -             |      |
| Visual Prompt<br>(Bahng et al., 2022)                    | IN-V2              | 69.8            | -     | 7.0  | 38.4          | 25.1      | 28.8 | 58.3   | 38.1       | 45.5          |      |
|                                                          | IN-A               | 58.2            | 46.7  | -    | 32.9          | 18.2      | 24.5 | 44.4   | 23.4       | 29.9          |      |
|                                                          | IN-R               | 62.1            | 50.5  | 6.5  | -             | 33.7      | 25.2 | 52.9   | 42.1       | 39.4          |      |
|                                                          | IN-Sketch          | 66.1            | 53.4  | 5.8  | 48.8          | -         | 26.5 | 57.1   | 45.0       | 43.1          |      |
|                                                          | ObjNet             | 60.5            | 49.0  | 7.1  | 29.8          | 17.6      | -    | 44.0   | 23.7       | 33.1          |      |
|                                                          | IN-Cartoon         | 70.6            | 56.7  | 6.5  | 40.1          | 26.3      | 27.0 | -      | 39.6       | 42.4          |      |
|                                                          | IN-Drawing         | 66.2            | 53.2  | 4.8  | 39.5          | 26.0      | 23.9 | 55.6   | -          | 42.3          |      |
|                                                          | IN-C               | 72.1            | 58.8  | 8.0  | 37.6          | 25.8      | 29.1 | 61.1   | 46.3       | -             |      |
| LoRA<br>(Hu et al., 2021)                                | IN-V2              | 75.0            | -     | 8.1  | 37.9          | 27.3      | 28.5 | 65.4   | 40.9       | 53.9          |      |
|                                                          | IN-A               | 74.8            | 61.0  | -    | 38.7          | 27.1      | 30.0 | 64.5   | 40.6       | 53.4          |      |
|                                                          | IN-R               | 73.8            | 60.1  | 8.7  | -             | 28.6      | 29.1 | 65.9   | 43.5       | 50.6          |      |
|                                                          | IN-Sketch          | 73.9            | 60.1  | 8.1  | 42.2          | -         | 28.9 | 66.3   | 43.7       | 51.6          |      |
|                                                          | ObjNet             | 74.8            | 61.2  | 9.9  | 39.2          | 27.5      | -    | 65.1   | 41.6       | 53.4          |      |
|                                                          | IN-Cartoon         | 74.7            | 60.8  | 7.9  | 39.6          | 27.7      | 29.0 | -      | 43.1       | 52.6          |      |
|                                                          | IN-Drawing         | 73.6            | 60.6  | 8.5  | 41.7          | 28.0      | 28.5 | 64.4   | -          | 52.1          |      |
|                                                          | IN-C               | 75.6            | 61.9  | 9.9  | 41.1          | 28.7      | 31.2 | 66.0   | 50.6       | -             |      |
| EWC<br>(Kirkpatrick et al., 2017)                        | IN-V2              | 75.4            | -     | 9.8  | 40.2          | 28.1      | 30.8 | 65.7   | 43.0       | 55.3          |      |
|                                                          | IN-A               | 69.7            | 56.9  | -    | 38.8          | 25.9      | 28.8 | 58.1   | 34.4       | 49.9          |      |
|                                                          | IN-R               | 71.2            | 58.4  | 10.9 | -             | 39.7      | 29.4 | 63.9   | 51.2       | 52.5          |      |
|                                                          | IN-Sketch          | 73.7            | 60.2  | 8.7  | 48.8          | -         | 28.5 | 65.2   | 46.6       | 53.8          |      |
|                                                          | ObjNet             | 74.1            | 61.0  | 11.2 | 38.1          | 26.9      | -    | 62.4   | 39.7       | 54.0          |      |
|                                                          | IN-Cartoon         | 75.0            | 60.9  | 8.6  | 41.2          | 28.5      | 28.8 | -      | 43.2       | 52.8          |      |
|                                                          | IN-Drawing         | 74.3            | 60.6  | 9.0  | 43.9          | 31.0      | 29.5 | 65.5   | -          | 55.1          |      |
|                                                          | IN-C               | 75.5            | 62.0  | 9.7  | 40.5          | 28.4      | 31.3 | 65.4   | 48.3       | -             |      |
| LwF<br>(Li & Hoiem, 2017)                                | IN-V2              | 74.3            | -     | 11.9 | 40.6          | 28.2      | 30.7 | 64.1   | 41.0       | 54.0          |      |
|                                                          | IN-A               | 71.1            | 58.5  | -    | 37.2          | 25.5      | 29.8 | 59.3   | 36.8       | 52.0          |      |
|                                                          | IN-R               | 71.2            | 58.5  | 11.2 | -             | 44.7      | 28.8 | 63.4   | 51.1       | 53.0          |      |
|                                                          | IN-Sketch          | 72.3            | 59.1  | 8.7  | 55.3          | -         | 28.6 | 64.7   | 47.2       | 52.5          |      |
|                                                          | ObjNet             | 73.1            | 59.5  | 12.2 | 36.5          | 25.2      | -    | 59.8   | 34.6       | 52.1          |      |
|                                                          | IN-Cartoon         | 84.6            | 59.9  | 10.7 | 39.9          | 28.3      | 29.2 | -      | 43.0       | 54.1          |      |
|                                                          | IN-Drawing         | 79.3            | 58.9  | 9.3  | 41.3          | 29.6      | 27.5 | 66.6   | -          | 55.2          |      |
|                                                          | IN-C               | 99.0            | 59.2  | 7.6  | 38.7          | 26.7      | 26.4 | 92.3   | 64.7       | -             |      |
| LP-FT<br>(Kumar et al., 2022)                            | IN-V2              | 73.8            | -     | 12.7 | 40.7          | 28.1      | 31.1 | 63.7   | 40.6       | 53.7          |      |
|                                                          | IN-A               | 71.7            | 58.9  | -    | 36.8          | 25.9      | 30.1 | 60.5   | 36.7       | 52.2          |      |
|                                                          | IN-R               | 70.4            | 57.9  | 11.6 | -             | 43.6      | 29.8 | 62.4   | 50.1       | 51.4          |      |
|                                                          | IN-Sketch          | 71.1            | 58.2  | 9.0  | 56.3          | -         | 28.5 | 63.8   | 47.3       | 51.1          |      |
|                                                          | ObjNet             | 72.3            | 58.9  | 12.7 | 36.8          | 25.7      | -    | 59.4   | 34.9       | 51.3          |      |
|                                                          | IN-Cartoon         | 84.7            | 58.7  | 11.0 | 40.3          | 28.2      | 28.5 | -      | 43.7       | 52.6          |      |
|                                                          | IN-Drawing         | 78.1            | 57.1  | 8.6  | 41.9          | 30.1      | 26.1 | 64.8   | -          | 53.6          |      |
|                                                          | IN-C               | 99.9            | 51.8  | 7.2  | 35.1          | 22.7      | 20.0 | 96.7   | 78.4       | -             |      |
| WiSE-FT<br>(Wortsman et al., 2022b)                      | IN-V2              | 75.1            | -     | 10.9 | 39.7          | 28.1      | 30.5 | 65.2   | 41.6       | 54.7          |      |
|                                                          | IN-A               | 74.0            | 60.9  | -    | 38.6          | 27.3      | 31.2 | 63.3   | 38.7       | 54.3          |      |
|                                                          | IN-R               | 74.2            | 61.2  | 10.9 | -             | 41.0      | 30.9 | 66.7   | 52.0       | 55.4          |      |
|                                                          | IN-Sketch          | 74.3            | 61.0  | 9.0  | 49.7          | -         | 29.6 | 66.5   | 46.9       | 54.4          |      |
|                                                          | ObjNet             | 74.7            | 61.4  | 11.6 | 38.3          | 27.2      | -    | 63.3   | 38.8       | 54.3          |      |
|                                                          | IN-Cartoon         | 80.3            | 61.1  | 10.4 | 40.0          | 28.5      | 29.8 | -      | 42.9       | 54.2          |      |
|                                                          | IN-Drawing         | 78.4            | 61.0  | 9.7  | 41.3          | 30.3      | 29.5 | 67.2   | -          | 56.9          |      |
|                                                          | IN-C               | 92.0            | 60.8  | 10.2 | 39.7          | 28.1      | 29.4 | 83.0   | 58.8       | -             |      |
| Model Soup<br>PRE-FT-EWC-LwF<br>(Wortsman et al., 2022a) | IN-V2              | 75.2            | -     | 10.8 | 40.0          | 28.2      | 30.6 | 65.3   | 42.0       | 54.9          |      |
|                                                          | IN-A               | 73.1            | 60.0  | -    | 38.4          | 26.8      | 31.1 | 62.0   | 37.2       | 53.6          |      |
|                                                          | IN-R               | 74.1            | 61.1  | 11.2 | -             | 41.8      | 30.7 | 66.6   | 52.5       | 55.3          |      |
|                                                          | IN-Sketch          | 74.4            | 60.9  | 8.9  | 51.0          | -         | 29.5 | 66.4   | 47.2       | 54.4          |      |
|                                                          | ObjNet             | 74.6            | 61.4  | 11.9 | 38.0          | 27.0      | -    | 62.9   | 38.5       | 54.3          |      |
|                                                          | IN-Cartoon         | 80.2            | 61.2  | 10.1 | 40.6          | 28.8      | 29.8 | -      | 43.4       | 54.3          |      |
|                                                          | IN-Drawing         | 78.2            | 61.0  | 9.6  | 42.2          | 30.9      | 29.5 | 67.3   | -          | 56.9          |      |
|                                                          | IN-C               | 91.0            | 61.6  | 9.9  | 40.4          | 28.6      | 29.7 | 81.6   | 58.0       | -             |      |

Table S9: The accuracy on each OOD dataset after fine-tuning ImageNet-21K pretrained ViT-B/32 with AugReg on the downstream datasets with various methods. Note that ImageNet-Drawing, ImageNet-Cartoon, and ImageNet-C are generated from the ImageNet validation set. Green and red indicate relative performance increases and decreases, respectively, compared to the pretrained model. Bold indicates the best performance on each evaluation dataset.

| Method                                                   | Downstream Dataset | $D_{pre}$<br>IN | IN-V2 | IN-A | Realistic OOD |           |        | Synthetic OOD |            |      |
|----------------------------------------------------------|--------------------|-----------------|-------|------|---------------|-----------|--------|---------------|------------|------|
|                                                          |                    |                 |       |      | IN-R          | IN-Sketch | ObjNet | IN-Cartoon    | IN-Drawing | IN-C |
| Pretrained                                               |                    | 80.7            | 69.0  | 22.4 | 49.3          | 37.1      | 40.7   | 70.6          | 42.5       | 60.5 |
| FT                                                       | IN-V2              | 78.8            | -     | 31.5 | 50.5          | 36.1      | 42.9   | 67.0          | 39.5       | 60.2 |
|                                                          | IN-A               | 75.0            | 64.1  | -    | 47.6          | 34.4      | 42.5   | 60.8          | 36.1       | 56.9 |
|                                                          | IN-R               | 72.2            | 62.0  | 25.0 | -             | 51.3      | 38.3   | 63.7          | 52.8       | 55.3 |
|                                                          | IN-Sketch          | 76.0            | 65.2  | 23.6 | 65.3          | -         | 40.1   | 68.1          | 54.4       | 57.0 |
|                                                          | ObjNet             | 74.9            | 63.5  | 29.1 | 44.3          | 32.1      | -      | 57.4          | 35.5       | 55.3 |
|                                                          | IN-Cartoon         | 88.0            | 65.3  | 25.1 | 50.4          | 36.5      | 39.5   | -             | 47.4       | 56.7 |
|                                                          | IN-Drawing         | 84.3            | 64.1  | 21.7 | 51.5          | 39.3      | 38.2   | 71.1          | -          | 59.5 |
|                                                          | IN-C               | 99.8            | 62.2  | 18.7 | 45.5          | 32.0      | 34.1   | 94.3          | 75.5       | -    |
| Linear Probing                                           | IN-V2              | 80.3            | -     | 23.7 | 49.5          | 36.7      | 40.3   | 70.1          | 41.9       | 60.1 |
|                                                          | IN-A               | 79.3            | 67.7  | -    | 49.1          | 36.4      | 40.9   | 69.2          | 41.5       | 59.4 |
|                                                          | IN-R               | 79.7            | 68.6  | 23.9 | -             | 39.4      | 39.9   | 69.4          | 42.7       | 59.7 |
|                                                          | IN-Sketch          | 77.9            | 66.6  | 23.8 | 57.0          | -         | 40.6   | 68.3          | 45.1       | 58.4 |
|                                                          | ObjNet             | 79.7            | 68.3  | 24.4 | 49.5          | 36.9      | -      | 69.5          | 42.3       | 60.3 |
|                                                          | IN-Cartoon         | 85.6            | 67.8  | 22.0 | 50.1          | 36.7      | 40.2   | -             | 46.8       | 62.6 |
|                                                          | IN-Drawing         | 82.6            | 68.1  | 23.3 | 51.1          | 38.4      | 40.4   | 73.5          | -          | 63.0 |
|                                                          | IN-C               | 98.3            | 59.2  | 20.1 | 43.4          | 30.7      | 31.7   | 89.5          | 62.0       | -    |
| Visual Prompt<br>(Bahng et al., 2022)                    | IN-V2              | 76.1            | -     | 18.9 | 46.6          | 33.2      | 40.5   | 62.6          | 35.7       | 51.1 |
|                                                          | IN-A               | 67.6            | 55.5  | -    | 40.6          | 25.7      | 38.7   | 50.2          | 27.3       | 39.7 |
|                                                          | IN-R               | 67.2            | 56.8  | 13.9 | -             | 42.5      | 33.4   | 56.2          | 42.5       | 42.6 |
|                                                          | IN-Sketch          | 72.2            | 60.3  | 14.0 | 57.2          | -         | 37.0   | 61.3          | 44.2       | 46.2 |
|                                                          | ObjNet             | 62.6            | 51.1  | 13.1 | 32.0          | 20.7      | -      | 40.8          | 18.0       | 30.9 |
|                                                          | IN-Cartoon         | 75.4            | 62.8  | 15.4 | 46.7          | 32.4      | 37.9   | -             | 37.5       | 45.5 |
|                                                          | IN-Drawing         | 73.1            | 61.0  | 12.6 | 48.3          | 34.6      | 34.1   | 61.3          | -          | 46.7 |
|                                                          | IN-C               | 77.3            | 65.2  | 20.7 | 45.9          | 31.8      | 41.1   | 64.3          | 45.6       | -    |
| LoRA<br>(Hu et al., 2021)                                | IN-V2              | 80.7            | -     | 22.5 | 49.2          | 37.1      | 40.7   | 70.6          | 42.5       | 60.5 |
|                                                          | IN-A               | 80.7            | 69.4  | -    | 49.9          | 37.2      | 42.4   | 70.3          | 43.0       | 61.2 |
|                                                          | IN-R               | 80.7            | 69.3  | 24.9 | -             | 37.6      | 42.3   | 70.6          | 43.9       | 60.9 |
|                                                          | IN-Sketch          | 80.6            | 69.1  | 22.9 | 52.7          | -         | 41.2   | 70.9          | 46.0       | 60.8 |
|                                                          | ObjNet             | 80.7            | 69.3  | 25.4 | 50.1          | 37.1      | -      | 70.0          | 43.2       | 61.3 |
|                                                          | IN-Cartoon         | 80.7            | 69.1  | 22.3 | 49.8          | 37.0      | 40.8   | -             | 42.9       | 60.2 |
|                                                          | IN-Drawing         | 80.3            | 69.3  | 23.8 | 53.2          | 40.4      | 41.5   | 70.7          | -          | 61.0 |
|                                                          | IN-C               | 80.0            | 68.8  | 24.7 | 51.5          | 37.9      | 41.5   | 68.3          | 53.1       | -    |
| EWC<br>(Kirkpatrick et al., 2017)                        | IN-V2              | 81.0            | -     | 28.0 | 51.2          | 37.6      | 44.0   | 70.2          | 43.4       | 62.1 |
|                                                          | IN-A               | 78.8            | 67.7  | -    | 50.7          | 36.4      | 45.2   | 66.2          | 37.8       | 60.9 |
|                                                          | IN-R               | 78.7            | 67.6  | 26.5 | -             | 49.2      | 40.8   | 69.9          | 56.8       | 60.0 |
|                                                          | IN-Sketch          | 80.2            | 68.8  | 24.1 | 60.8          | -         | 41.7   | 71.9          | 54.0       | 61.1 |
|                                                          | ObjNet             | 77.9            | 67.3  | 30.7 | 48.0          | 36.2      | -      | 62.2          | 39.9       | 60.1 |
|                                                          | IN-Cartoon         | 80.4            | 68.1  | 23.5 | 52.1          | 37.9      | 41.1   | -             | 46.6       | 59.0 |
|                                                          | IN-Drawing         | 80.3            | 68.8  | 23.1 | 53.5          | 41.6      | 41.5   | 71.9          | -          | 61.2 |
|                                                          | IN-C               | 81.0            | 69.5  | 26.6 | 51.0          | 38.3      | 43.4   | 69.6          | 49.1       | -    |
| LwF<br>(Li & Hoiem, 2017)                                | IN-V2              | 80.1            | -     | 28.0 | 50.6          | 36.9      | 42.3   | 69.4          | 41.4       | 61.1 |
|                                                          | IN-A               | 79.3            | 68.2  | -    | 49.7          | 36.2      | 42.5   | 67.7          | 41.4       | 60.6 |
|                                                          | IN-R               | 79.2            | 67.8  | 25.9 | -             | 50.3      | 39.8   | 70.9          | 54.6       | 60.9 |
|                                                          | IN-Sketch          | 78.1            | 67.1  | 23.4 | 63.2          | -         | 40.6   | 70.1          | 51.1       | 59.1 |
|                                                          | ObjNet             | 78.5            | 67.2  | 30.8 | 47.5          | 34.7      | -      | 64.8          | 38.4       | 59.1 |
|                                                          | IN-Cartoon         | 89.8            | 68.3  | 25.2 | 51.1          | 37.3      | 40.9   | -             | 47.3       | 63.0 |
|                                                          | IN-Drawing         | 86.3            | 67.0  | 22.7 | 51.9          | 39.9      | 39.4   | 73.8          | -          | 63.1 |
|                                                          | IN-C               | 99.4            | 66.5  | 20.0 | 49.4          | 35.9      | 38.2   | 93.1          | 63.7       | -    |
| LP-FT<br>(Kumar et al., 2022)                            | IN-V2              | 79.4            | -     | 30.3 | 50.9          | 36.7      | 42.6   | 68.3          | 41.2       | 60.7 |
|                                                          | IN-A               | 77.8            | 67.0  | -    | 48.7          | 36.0      | 43.3   | 65.8          | 40.0       | 59.5 |
|                                                          | IN-R               | 77.3            | 66.5  | 26.4 | -             | 50.5      | 40.4   | 68.0          | 54.7       | 59.0 |
|                                                          | IN-Sketch          | 76.3            | 65.3  | 23.2 | 64.2          | -         | 40.4   | 68.3          | 50.5       | 57.5 |
|                                                          | ObjNet             | 78.0            | 67.2  | 30.2 | 48.3          | 34.8      | -      | 65.4          | 39.9       | 58.9 |
|                                                          | IN-Cartoon         | 90.5            | 66.5  | 26.0 | 51.2          | 37.1      | 40.2   | -             | 49.6       | 61.3 |
|                                                          | IN-Drawing         | 86.3            | 65.4  | 22.9 | 51.9          | 39.8      | 38.8   | 73.8          | -          | 62.6 |
|                                                          | IN-C               | 99.9            | 57.5  | 15.0 | 43.1          | 29.8      | 29.7   | 96.7          | 80.4       | -    |
| WiSE-FT<br>(Wortsman et al., 2022b)                      | IN-V2              | 80.7            | -     | 28.7 | 51.0          | 37.8      | 43.3   | 70.1          | 42.6       | 61.7 |
|                                                          | IN-A               | 80.1            | 69.0  | -    | 50.9          | 37.7      | 45.1   | 69.0          | 42.5       | 61.9 |
|                                                          | IN-R               | 80.0            | 69.1  | 28.7 | -             | 49.8      | 43.4   | 71.9          | 56.8       | 62.4 |
|                                                          | IN-Sketch          | 79.9            | 69.0  | 24.5 | 61.4          | -         | 42.1   | 71.9          | 53.1       | 61.0 |
|                                                          | ObjNet             | 80.1            | 69.0  | 29.8 | 49.8          | 37.3      | -      | 68.2          | 43.1       | 61.2 |
|                                                          | IN-Cartoon         | 86.0            | 69.0  | 25.9 | 51.5          | 38.2      | 41.7   | -             | 48.2       | 60.9 |
|                                                          | IN-Drawing         | 84.4            | 68.8  | 25.1 | 52.6          | 41.3      | 41.7   | 73.6          | -          | 63.6 |
|                                                          | IN-C               | 95.3            | 68.6  | 24.9 | 51.0          | 37.8      | 41.3   | 87.5          | 62.2       | -    |
| Model Soup<br>PRE-FT-EWC-LwF<br>(Wortsman et al., 2022a) | IN-V2              | 80.7            | -     | 28.3 | 51.1          | 37.7      | 43.3   | 70.1          | 42.8       | 61.7 |
|                                                          | IN-A               | 79.9            | 68.9  | -    | 50.7          | 37.3      | 44.8   | 68.5          | 41.8       | 61.6 |
|                                                          | IN-R               | 79.9            | 69.1  | 28.6 | -             | 50.4      | 42.6   | 71.9          | 57.3       | 62.2 |
|                                                          | IN-Sketch          | 79.8            | 68.9  | 24.1 | 62.5          | -         | 41.9   | 71.9          | 53.6       | 61.0 |
|                                                          | ObjNet             | 79.7            | 68.6  | 30.7 | 49.2          | 36.9      | -      | 67.2          | 42.1       | 60.9 |
|                                                          | IN-Cartoon         | 85.7            | 68.8  | 25.4 | 51.9          | 38.2      | 41.5   | -             | 48.1       | 61.1 |
|                                                          | IN-Drawing         | 84.3            | 68.5  | 24.7 | 52.9          | 41.5      | 41.4   | 73.7          | -          | 63.3 |
|                                                          | IN-C               | 94.1            | 69.0  | 24.9 | 51.5          | 38.3      | 41.5   | 85.7          | 60.0       | -    |

Table S10: The accuracy on each OOD datasets after fine-tuning LAION-2B pretrained ViT-B/32 on the downstream datasets with various methods. Note that ImageNet-Drawing, ImageNet-Cartoon, and ImageNet-C are generated from the ImageNet validation set. Green and red indicate relative performance increases and decreases, respectively, compared to the pretrained model. Bold indicates the best performance on each evaluation dataset.

| Method                                                   | Downstream Dataset | $D_{pre}$ IN | IN-V2       | IN-A        | Realistic OOD<br>IN-R | IN-Sketch   | ObjNet      | Synthetic OOD<br>IN-Cartoon | IN-Drawing  | IN-C        |
|----------------------------------------------------------|--------------------|--------------|-------------|-------------|-----------------------|-------------|-------------|-----------------------------|-------------|-------------|
| Pretrained                                               |                    | 82.6         | <b>71.6</b> | 22.8        | 59.2                  | 49.1        | 43.5        | 73.0                        | 42.3        | 57.5        |
| FT                                                       | IN-V2              | 50.6         | -           | 5.1         | 24.7                  | 11.4        | 16.9        | 34.5                        | 15.1        | 21.7        |
|                                                          | IN-A               | 21.2         | 18.6        | -           | 10.2                  | 4.1         | 10.1        | 12.8                        | 4.1         | 7.0         |
|                                                          | IN-R               | 42.0         | 32.5        | 4.5         | -                     | 31.9        | 16.7        | 31.6                        | 19.4        | 20.9        |
|                                                          | IN-Sketch          | 24.7         | 20.2        | 1.6         | 37.5                  | -           | 8.8         | 19.3                        | 10.3        | 9.7         |
|                                                          | ObjNet             | 31.9         | 23.7        | 3.6         | 15.0                  | 6.9         | -           | 18.6                        | 6.2         | 12.2        |
|                                                          | IN-Cartoon         | 85.0         | 42.6        | 5.8         | 30.6                  | 17.1        | 18.6        | -                           | 32.0        | 27.3        |
|                                                          | IN-Drawing         | 52.2         | 29.3        | 3.0         | 25.6                  | 15.3        | 10.6        | 41.8                        | -           | 21.6        |
|                                                          | IN-C               | 99.8         | 44.1        | 4.7         | 31.7                  | 18.4        | 16.8        | 97.3                        | <b>81.2</b> | -           |
| Linear Probing                                           | IN-V2              | 82.4         | -           | 24.2        | 58.7                  | 46.8        | 44.3        | 72.1                        | 42.5        | 58.1        |
|                                                          | IN-A               | 81.2         | 70.6        | -           | 59.0                  | 45.7        | <b>46.5</b> | 70.6                        | 35.2        | <b>58.2</b> |
|                                                          | IN-R               | 79.3         | 68.0        | 21.2        | -                     | 52.6        | 40.8        | 71.1                        | 51.1        | 56.1        |
|                                                          | IN-Sketch          | 79.5         | 68.0        | 21.2        | <b>66.8</b>           | -           | 42.0        | 70.8                        | 49.1        | 55.6        |
|                                                          | ObjNet             | 81.0         | 69.7        | <b>26.7</b> | 56.9                  | 43.7        | -           | 67.8                        | 38.8        | 56.6        |
|                                                          | IN-Cartoon         | 81.3         | 68.2        | 19.5        | 59.7                  | 45.7        | 39.7        | -                           | 45.6        | 51.2        |
|                                                          | IN-Drawing         | 78.0         | 64.5        | 13.4        | 58.0                  | 44.4        | 35.5        | 68.7                        | -           | 49.8        |
|                                                          | IN-C               | 96.0         | 64.2        | 15.7        | 53.3                  | 41.0        | 33.9        | 88.4                        | <b>68.5</b> | -           |
| Visual Prompt<br>(Bahng et al., 2022)                    | IN-V2              | 78.7         | -           | 16.4        | 54.2                  | 44.3        | 41.5        | 65.1                        | 33.2        | 47.9        |
|                                                          | IN-A               | 73.9         | 62.1        | -           | 52.1                  | 36.7        | 42.2        | 57.7                        | 23.7        | 36.9        |
|                                                          | IN-R               | 74.3         | 62.5        | 15.0        | -                     | 48.7        | 38.4        | 62.1                        | 41.0        | 43.9        |
|                                                          | IN-Sketch          | 76.2         | 63.9        | 13.5        | 60.7                  | -           | 39.0        | 64.5                        | 41.3        | 45.1        |
|                                                          | ObjNet             | 68.3         | 55.9        | 14.6        | 34.1                  | 28.6        | -           | 47.4                        | <b>13.9</b> | 27.7        |
|                                                          | IN-Cartoon         | 78.4         | 65.5        | 14.6        | 55.9                  | 43.9        | 38.9        | -                           | 39.2        | 44.9        |
|                                                          | IN-Drawing         | 77.6         | 65.3        | 13.3        | 56.5                  | 44.8        | 38.1        | 64.7                        | -           | 47.2        |
|                                                          | IN-C               | 80.0         | 68.2        | 18.6        | 57.9                  | 46.0        | 41.7        | 68.8                        | <b>50.0</b> | -           |
| LoRA<br>(Hu et al., 2021)                                | IN-V2              | 82.3         | -           | 23.7        | 58.6                  | 46.5        | 44.4        | 72.2                        | 42.8        | 58.1        |
|                                                          | IN-A               | 81.0         | 70.2        | -           | 58.8                  | 45.2        | 46.1        | 70.3                        | 33.8        | 57.9        |
|                                                          | IN-R               | 78.8         | 67.2        | 20.3        | -                     | 52.2        | 40.2        | 71.1                        | 50.9        | 54.8        |
|                                                          | IN-Sketch          | 78.6         | 66.8        | 17.6        | 64.9                  | -           | 39.4        | 70.1                        | 51.1        | 53.4        |
|                                                          | ObjNet             | 80.3         | 68.9        | 24.0        | 55.6                  | 42.2        | -           | 65.4                        | 36.4        | 54.9        |
|                                                          | IN-Cartoon         | 79.9         | 67.8        | 19.2        | 59.4                  | 45.6        | 39.7        | -                           | 45.4        | 50.3        |
|                                                          | IN-Drawing         | 76.7         | 64.3        | 13.6        | 57.9                  | 44.4        | 35.9        | 67.7                        | -           | 49.8        |
|                                                          | IN-C               | 83.1         | 70.4        | 23.8        | 58.9                  | 46.7        | 41.9        | 73.1                        | <b>53.9</b> | -           |
| EWC<br>(Kirkpatrick et al., 2017)                        | IN-V2              | 76.5         | -           | 16.1        | 46.3                  | 31.0        | 35.6        | 61.4                        | 34.0        | 48.4        |
|                                                          | IN-A               | 60.0         | 48.3        | -           | 31.6                  | 18.8        | 28.5        | 40.6                        | 18.0        | 30.7        |
|                                                          | IN-R               | 76.1         | 65.1        | 21.5        | -                     | <b>53.9</b> | 39.1        | 67.5                        | 51.0        | 53.0        |
|                                                          | IN-Sketch          | 66.6         | 54.9        | 12.8        | 55.4                  | -           | 26.8        | 60.0                        | 40.1        | 39.7        |
|                                                          | ObjNet             | 72.9         | 60.1        | 18.5        | 41.8                  | 29.0        | -           | 50.5                        | 26.3        | 43.0        |
|                                                          | IN-Cartoon         | 81.0         | 67.1        | 19.6        | 57.7                  | 43.7        | 39.1        | -                           | 46.1        | 48.1        |
|                                                          | IN-Drawing         | 72.6         | 59.0        | 12.2        | 53.4                  | 41.0        | 28.8        | 62.0                        | -           | 43.6        |
|                                                          | IN-C               | 81.2         | 68.3        | 18.6        | 56.9                  | 43.2        | 40.3        | 70.5                        | <b>55.9</b> | -           |
| LwF<br>(Li & Hoiem, 2017)                                | IN-V2              | 56.9         | -           | 5.4         | 26.5                  | 13.2        | 19.6        | 40.2                        | 16.8        | 26.1        |
|                                                          | IN-A               | 37.9         | 29.4        | -           | 16.6                  | 7.2         | 13.2        | 23.7                        | 8.3         | 14.5        |
|                                                          | IN-R               | 54.5         | 42.8        | 5.2         | -                     | 36.0        | 20.0        | 41.9                        | 25.5        | 28.9        |
|                                                          | IN-Sketch          | 33.3         | 26.0        | 2.4         | 40.9                  | -           | 11.3        | 26.4                        | 13.4        | 13.7        |
|                                                          | ObjNet             | 49.0         | 37.4        | 3.8         | 20.3                  | 10.1        | -           | 30.0                        | 12.3        | 20.7        |
|                                                          | IN-Cartoon         | 89.8         | 51.9        | 6.9         | 36.2                  | 22.2        | 23.5        | -                           | 39.0        | 36.6        |
|                                                          | IN-Drawing         | 63.9         | 37.5        | 3.7         | 32.1                  | 20.4        | 14.9        | 52.0                        | -           | 28.2        |
|                                                          | IN-C               | 99.6         | 49.5        | 4.6         | 35.3                  | 21.0        | 19.8        | 96.1                        | <b>75.1</b> | -           |
| LP-FT<br>(Kumar et al., 2022)                            | IN-V2              | 50.4         | -           | 5.7         | 24.1                  | 11.3        | 16.2        | 34.6                        | 14.2        | 22.0        |
|                                                          | IN-A               | 25.0         | 19.7        | -           | 11.5                  | 5.2         | 10.4        | 15.0                        | 5.1         | 9.0         |
|                                                          | IN-R               | 44.2         | 34.3        | 4.5         | -                     | 32.8        | 17.6        | 33.5                        | 19.9        | 22.2        |
|                                                          | IN-Sketch          | 28.5         | 22.4        | 2.1         | 39.3                  | -           | 9.9         | 21.9                        | 11.3        | 11.5        |
|                                                          | ObjNet             | 35.7         | 27.3        | 4.0         | 16.1                  | 7.7         | -           | 20.6                        | 7.6         | 14.4        |
|                                                          | IN-Cartoon         | 85.9         | 43.5        | 5.4         | 30.8                  | 17.1        | 18.3        | -                           | 31.1        | 28.6        |
|                                                          | IN-Drawing         | 57.3         | 31.6        | 3.1         | 27.2                  | 17.0        | 12.2        | 46.9                        | -           | 22.7        |
|                                                          | IN-C               | 99.9         | 42.0        | 4.2         | 29.8                  | 17.1        | 14.1        | 98.2                        | <b>83.4</b> | -           |
| WiSE-FT<br>(Wortsman et al., 2022b)                      | IN-V2              | 72.8         | -           | 12.8        | 40.0                  | 25.0        | 31.1        | 54.9                        | 31.4        | 43.5        |
|                                                          | IN-A               | 65.3         | 53.5        | -           | 32.9                  | 19.7        | 28.0        | 44.5                        | 20.8        | 37.0        |
|                                                          | IN-R               | 72.3         | 60.4        | 12.9        | -                     | 44.1        | 33.1        | 59.5                        | 42.8        | 46.5        |
|                                                          | IN-Sketch          | 60.9         | 49.6        | 7.4         | 52.0                  | -           | 23.4        | 49.3                        | 30.3        | 33.3        |
|                                                          | ObjNet             | 70.7         | 57.0        | 13.5        | 37.2                  | 22.7        | -           | 49.7                        | 28.0        | 41.6        |
|                                                          | IN-Cartoon         | 84.8         | 63.5        | 14.4        | 47.4                  | 32.0        | 33.4        | -                           | 47.6        | 48.8        |
|                                                          | IN-Drawing         | 75.5         | 55.3        | 9.5         | 45.7                  | 32.6        | 25.1        | 63.2                        | -           | 44.7        |
|                                                          | IN-C               | 91.7         | 61.2        | 10.5        | 51.0                  | 36.6        | 30.6        | 86.4                        | <b>69.8</b> | -           |
| Model Soup<br>PRE-FT-EWC-LwF<br>(Wortsman et al., 2022a) | IN-V2              | 74.7         | -           | 14.1        | 43.6                  | 28.6        | 33.2        | 57.5                        | 37.0        | 46.5        |
|                                                          | IN-A               | 68.8         | 56.3        | -           | 36.5                  | 22.9        | 31.2        | 48.6                        | 26.8        | 40.5        |
|                                                          | IN-R               | 74.5         | 63.0        | 14.9        | -                     | 47.9        | 35.1        | 62.2                        | 47.3        | 49.8        |
|                                                          | IN-Sketch          | 61.6         | 50.4        | 7.8         | 53.6                  | -           | 23.7        | 51.1                        | 34.0        | 34.7        |
|                                                          | ObjNet             | 73.8         | 61.2        | 14.6        | 41.1                  | 26.8        | -           | 53.5                        | 33.0        | 45.1        |
|                                                          | IN-Cartoon         | 85.3         | 65.5        | 15.3        | 50.9                  | 36.3        | 35.1        | -                           | 51.9        | 50.9        |
|                                                          | IN-Drawing         | 76.0         | 56.6        | 9.7         | 49.1                  | 37.0        | 26.4        | 63.9                        | -           | 46.2        |
|                                                          | IN-C               | 91.1         | 62.8        | 11.1        | 53.0                  | 38.3        | 31.6        | 85.4                        | <b>69.9</b> | -           |

Table S11: The accuracy on each OOD dataset after fine-tuning OpenAI CLIP ViT-B/32 on the downstream datasets with various methods. Note that ImageNet-Drawing, ImageNet-Cartoon, and ImageNet-C are generated from the ImageNet validation set. Green and red indicate relative performance increases and decreases, respectively, compared to the pretrained model. Bold indicates the best performance on each evaluation dataset.

| Method                                                   | Downstream Dataset | $D_{pre}$ IN | IN-V2       | IN-A        | IN-R        | IN-Sketch   | ObjNet      | IN-Cartoon  | IN-Drawing  | IN-C        |
|----------------------------------------------------------|--------------------|--------------|-------------|-------------|-------------|-------------|-------------|-------------|-------------|-------------|
| Pretrained                                               |                    | 82.0         | <b>70.9</b> | 22.6        | 55.8        | 45.0        | 41.5        | 71.1        | 42.5        | 57.9        |
| FT                                                       | IN-V2              | 54.8         | -           | 6.5         | 24.5        | 10.4        | 18.4        | 38.3        | 16.2        | 25.9        |
|                                                          | IN-A               | 26.3         | 21.0        | -           | 11.0        | 3.9         | 12.3        | 14.8        | 5.1         | 10.1        |
|                                                          | IN-R               | 44.0         | 33.9        | 5.7         | -           | 32.1        | 16.4        | 34.0        | 21.9        | 23.1        |
|                                                          | IN-Sketch          | 28.0         | 21.1        | 2.2         | 39.9        | -           | 9.1         | 21.8        | 12.6        | 11.1        |
|                                                          | ObjNet             | 33.8         | 25.0        | 3.9         | 15.0        | 8.6         | -           | 19.6        | 6.8         | 13.4        |
|                                                          | IN-Cartoon         | 88.7         | 47.2        | 6.7         | 31.9        | 17.6        | 19.3        | -           | 36.8        | 31.4        |
|                                                          | IN-Drawing         | 60.3         | 32.9        | 3.5         | 28.0        | 16.7        | 12.4        | 49.4        | -           | 24.6        |
|                                                          | IN-C               | 99.8         | 44.5        | 4.5         | 30.2        | 17.2        | 16.2        | 97.1        | 80.7        | -           |
| Linear Probing                                           | IN-V2              | 81.6         | -           | 23.5        | 56.1        | 43.4        | 42.4        | 71.1        | 42.4        | <b>59.0</b> |
|                                                          | IN-A               | 80.6         | 69.9        | -           | 55.9        | 42.2        | <b>44.5</b> | 69.8        | 37.8        | 58.5        |
|                                                          | IN-R               | 77.7         | 66.3        | 18.2        | -           | 48.1        | 37.5        | 69.8        | 50.8        | 55.5        |
|                                                          | IN-Sketch          | 78.0         | 66.3        | 19.1        | <b>63.5</b> | -           | 39.2        | 69.7        | 48.6        | 55.4        |
|                                                          | ObjNet             | 80.3         | 69.4        | <b>26.6</b> | 54.6        | 41.2        | -           | 68.2        | 36.9        | 56.7        |
|                                                          | IN-Cartoon         | 80.8         | 67.5        | 20.0        | 57.1        | 42.4        | 37.9        | -           | 43.8        | 53.1        |
|                                                          | IN-Drawing         | 77.4         | 64.0        | 14.9        | 55.6        | 41.7        | 34.1        | 66.8        | -           | 48.6        |
|                                                          | IN-C               | 95.8         | 62.9        | 16.4        | 50.8        | 38.7        | 31.7        | 87.7        | 67.6        | -           |
| Visual Prompt<br>(Bahng et al., 2022)                    | IN-V2              | 78.5         | -           | 16.3        | 52.1        | 41.2        | 40.0        | 64.3        | 35.1        | 50.1        |
|                                                          | IN-A               | 72.9         | 61.3        | -           | 47.3        | 31.3        | 40.9        | 55.7        | 21.4        | 39.6        |
|                                                          | IN-R               | 73.9         | 62.7        | 15.5        | -           | 44.8        | 37.3        | 61.8        | 41.7        | 44.2        |
|                                                          | IN-Sketch          | 76.4         | 64.3        | 14.5        | 58.0        | -           | 38.7        | 64.5        | 43.0        | 47.2        |
|                                                          | ObjNet             | 65.9         | 53.5        | 14.8        | 41.9        | 24.9        | -           | 41.4        | 14.5        | 29.5        |
|                                                          | IN-Cartoon         | 77.7         | 65.3        | 16.2        | 53.3        | 39.7        | 37.7        | -           | 37.5        | 45.4        |
|                                                          | IN-Drawing         | 77.0         | 64.6        | 12.8        | 53.1        | 39.7        | 36.2        | 63.2        | -           | 46.1        |
|                                                          | IN-C               | 79.2         | 67.8        | 20.6        | 55.5        | 41.9        | 41.0        | 66.8        | 46.3        | -           |
| LoRA<br>(Hu et al., 2021)                                | IN-V2              | 81.5         | -           | 23.2        | 56.1        | 43.5        | 42.3        | 71.1        | 42.4        | 58.9        |
|                                                          | IN-A               | 80.3         | 69.6        | -           | 55.5        | 42.1        | 43.8        | 69.0        | 35.9        | 58.1        |
|                                                          | IN-R               | 77.5         | 66.0        | 18.4        | -           | 48.0        | 37.5        | 69.5        | 51.8        | 55.1        |
|                                                          | IN-Sketch          | 77.8         | 65.7        | 18.5        | 61.9        | -           | 38.4        | 68.9        | 51.4        | 53.5        |
|                                                          | ObjNet             | 79.3         | 67.8        | 23.3        | 54.1        | 39.9        | -           | 66.8        | 34.6        | 53.4        |
|                                                          | IN-Cartoon         | 79.5         | 67.4        | 19.6        | 56.8        | 42.4        | 38.1        | -           | 43.7        | 52.0        |
|                                                          | IN-Drawing         | 76.3         | 64.6        | 15.5        | 55.6        | 42.1        | 34.7        | 66.1        | -           | 48.4        |
|                                                          | IN-C               | 81.1         | 69.5        | 21.8        | 57.7        | 44.5        | 38.6        | 73.4        | 43.0        | -           |
| EWC<br>(Kirkpatrick et al., 2017)                        | IN-V2              | 78.2         | -           | 20.3        | 49.0        | 33.0        | 37.2        | 65.5        | 38.8        | 53.9        |
|                                                          | IN-A               | 67.1         | 55.4        | -           | 38.3        | 24.5        | 31.9        | 49.3        | 25.7        | 40.9        |
|                                                          | IN-R               | 75.2         | 63.8        | 21.7        | -           | <b>51.2</b> | 36.7        | 66.9        | 51.2        | 52.5        |
|                                                          | IN-Sketch          | 64.9         | 53.1        | 13.4        | 52.7        | -           | 24.9        | 59.3        | 40.3        | 38.8        |
|                                                          | ObjNet             | 73.1         | 61.2        | 20.9        | 43.0        | 29.5        | -           | 52.9        | 23.3        | 44.7        |
|                                                          | IN-Cartoon         | 80.8         | 67.2        | 20.3        | 55.4        | 41.0        | 37.9        | -           | 44.7        | 48.1        |
|                                                          | IN-Drawing         | 76.8         | 63.3        | 14.9        | 53.8        | 40.6        | 31.6        | 66.6        | -           | 48.7        |
|                                                          | IN-C               | 82.9         | 70.0        | 23.6        | 56.0        | 42.4        | 40.5        | 72.3        | 56.6        | -           |
| LwF<br>(Li & Hoiem, 2017)                                | IN-V2              | 60.5         | -           | 6.8         | 27.8        | 13.9        | 20.0        | 44.4        | 20.2        | 30.2        |
|                                                          | IN-A               | 42.3         | 33.0        | -           | 16.9        | 7.1         | 14.8        | 26.4        | 10.1        | 17.6        |
|                                                          | IN-R               | 55.1         | 43.5        | 5.4         | -           | 34.5        | 19.0        | 43.3        | 28.2        | 30.1        |
|                                                          | IN-Sketch          | 36.1         | 27.6        | 2.4         | 43.3        | -           | 10.8        | 27.8        | 16.0        | 15.3        |
|                                                          | ObjNet             | 52.1         | 40.1        | 4.9         | 20.0        | 10.7        | -           | 32.3        | 12.9        | 23.1        |
|                                                          | IN-Cartoon         | 91.7         | 53.0        | 6.8         | 35.3        | 21.1        | 22.0        | -           | 43.0        | 39.6        |
|                                                          | IN-Drawing         | 67.6         | 38.8        | 3.7         | 32.6        | 19.5        | 14.8        | 56.0        | -           | 29.6        |
|                                                          | IN-C               | 98.7         | 59.1        | 5.9         | 42.7        | 29.3        | 25.4        | 93.3        | 62.8        | -           |
| LP-FT<br>(Kumar et al., 2022)                            | IN-V2              | 55.4         | -           | 6.3         | 26.2        | 11.7        | 17.6        | 39.0        | 17.8        | 26.0        |
|                                                          | IN-A               | 30.7         | 23.6        | -           | 13.0        | 4.9         | 12.4        | 17.9        | 6.2         | 11.6        |
|                                                          | IN-R               | 47.6         | 37.3        | 5.6         | -           | 33.1        | 17.9        | 37.1        | 25.1        | 25.7        |
|                                                          | IN-Sketch          | 30.1         | 23.4        | 2.6         | 41.4        | -           | 10.0        | 23.1        | 13.9        | 12.3        |
|                                                          | ObjNet             | 38.6         | 28.8        | 4.5         | 15.1        | 7.4         | -           | 21.5        | 8.3         | 16.3        |
|                                                          | IN-Cartoon         | 89.2         | 47.1        | 6.5         | 32.6        | 18.8        | 19.2        | -           | 39.2        | 31.3        |
|                                                          | IN-Drawing         | 63.1         | 34.8        | 4.2         | 29.0        | 17.3        | 12.8        | 52.8        | -           | 25.7        |
|                                                          | IN-C               | <b>99.9</b>  | 42.1        | 4.7         | 29.1        | 16.0        | 14.5        | <b>98.0</b> | <b>82.5</b> | -           |
| WiSE-FT<br>(Wortsman et al., 2022b)                      | IN-V2              | 75.6         | -           | 15.2        | 42.9        | 26.9        | 32.7        | 60.7        | 37.0        | 49.1        |
|                                                          | IN-A               | 69.8         | 57.5        | -           | 37.0        | 21.5        | 31.3        | 51.7        | 27.2        | 43.3        |
|                                                          | IN-R               | 73.4         | 61.5        | 14.6        | -           | 45.8        | 32.7        | 62.7        | 47.4        | 49.5        |
|                                                          | IN-Sketch          | 64.2         | 52.2        | 8.2         | 54.6        | -           | 23.4        | 52.8        | 35.8        | 36.3        |
|                                                          | ObjNet             | 73.5         | 61.3        | 15.0        | 40.9        | 28.5        | -           | 55.7        | 30.1        | 46.7        |
|                                                          | IN-Cartoon         | 85.8         | 64.7        | 15.6        | 48.4        | 33.0        | 33.4        | -           | 50.2        | 50.8        |
|                                                          | IN-Drawing         | 77.3         | 56.8        | 10.0        | 47.0        | 34.6        | 23.8        | 66.8        | -           | 46.9        |
|                                                          | IN-C               | 91.9         | 61.4        | 11.1        | 47.9        | 32.7        | 29.6        | 86.6        | 69.7        | -           |
| Model Soup<br>PRE-FT-EWC-LwF<br>(Wortsman et al., 2022a) | IN-V2              | 76.5         | -           | 15.6        | 45.7        | 29.6        | 33.5        | 62.1        | 40.1        | 50.2        |
|                                                          | IN-A               | 71.2         | 59.3        | -           | 38.8        | 24.3        | 31.9        | 53.4        | 29.8        | 44.3        |
|                                                          | IN-R               | 74.9         | 63.6        | 16.2        | -           | 48.4        | 34.1        | 64.5        | 50.6        | 51.8        |
|                                                          | IN-Sketch          | 64.8         | 52.8        | 8.1         | 55.7        | -           | 23.4        | 54.0        | 37.2        | 37.2        |
|                                                          | ObjNet             | 75.2         | 63.1        | 16.5        | 42.7        | 30.3        | -           | 57.7        | 32.8        | 48.7        |
|                                                          | IN-Cartoon         | 85.8         | 65.6        | 15.9        | 50.1        | 35.1        | 33.9        | -           | 53.0        | 51.7        |
|                                                          | IN-Drawing         | 77.9         | 58.3        | 10.3        | 49.4        | 36.9        | 25.0        | 67.7        | -           | 47.9        |
|                                                          | IN-C               | 90.8         | 65.2        | 13.2        | 51.7        | 37.1        | 32.5        | 85.1        | 68.1        | -           |

Table S12: The accuracy on each OOD dataset after fine-tuning ImageNet-1K with AugReg pretrained ViT-S/16 on the downstream datasets with various methods. Note that ImageNet-Drawing, ImageNet-Cartoon, and ImageNet-C are generated from the ImageNet validation set. Green and red indicate relative performance increases and decreases, respectively, compared to the pretrained model. Bold indicates the best performance on each evaluation dataset.

| Method                                                   | Downstream Dataset | $D_{pre}$ IN | IN-V2 | IN-A | Realistic OOD |           |      | ObjNet | IN-Cartoon | Synthetic OOD |  |
|----------------------------------------------------------|--------------------|--------------|-------|------|---------------|-----------|------|--------|------------|---------------|--|
|                                                          |                    |              |       |      | IN-R          | IN-Sketch |      |        | IN-Drawing | IN-C          |  |
| Pretrained                                               |                    | 78.8         | 66.7  | 13.4 | 37.1          | 25.9      | 33.6 | 63.3   | 37.2       | 53.2          |  |
| FT                                                       | IN-V2              | 75.5         | -     | 19.8 | 38.1          | 25.0      | 35.3 | 58.2   | 35.9       | 51.2          |  |
|                                                          | IN-A               | 66.5         | 55.9  | -    | 33.5          | 22.0      | 31.0 | 46.5   | 26.6       | 44.1          |  |
|                                                          | IN-R               | 62.8         | 52.6  | 14.5 | -             | 41.2      | 28.8 | 53.0   | 40.4       | 42.7          |  |
|                                                          | IN-Sketch          | 70.6         | 59.2  | 11.5 | 56.6          | -         | 31.4 | 58.9   | 43.7       | 45.5          |  |
|                                                          | ObjNet             | 67.3         | 55.8  | 15.7 | 30.1          | 18.5      | -    | 43.9   | 23.0       | 41.9          |  |
|                                                          | IN-Cartoon         | 86.8         | 59.3  | 15.1 | 37.0          | 23.9      | 31.7 | -      | 38.7       | 44.4          |  |
|                                                          | IN-Drawing         | 77.6         | 55.9  | 10.2 | 35.8          | 24.8      | 26.7 | 56.5   | -          | 46.0          |  |
|                                                          | IN-C               | 99.9         | 55.0  | 8.3  | 31.1          | 18.3      | 24.0 | 91.8   | 68.8       | -             |  |
| Linear Probing                                           | IN-V2              | 78.6         | -     | 14.3 | 37.4          | 25.8      | 33.9 | 63.0   | 36.8       | 53.1          |  |
|                                                          | IN-A               | 77.7         | 65.5  | -    | 37.1          | 25.4      | 35.1 | 61.4   | 36.3       | 53.0          |  |
|                                                          | IN-R               | 78.2         | 66.2  | 15.3 | -             | 29.0      | 34.3 | 63.3   | 38.5       | 53.0          |  |
|                                                          | IN-Sketch          | 76.1         | 64.0  | 15.0 | 47.2          | -         | 34.6 | 62.6   | 39.5       | 50.9          |  |
|                                                          | ObjNet             | 78.1         | 66.1  | 16.2 | 37.0          | 25.2      | -    | 61.1   | 36.6       | 53.4          |  |
|                                                          | IN-Cartoon         | 80.4         | 64.9  | 13.0 | 38.5          | 25.8      | 32.9 | -      | 38.8       | 52.6          |  |
|                                                          | IN-Drawing         | 78.6         | 65.2  | 13.8 | 39.7          | 27.2      | 33.3 | 63.6   | -          | 54.3          |  |
|                                                          | IN-C               | 93.5         | 58.7  | 10.9 | 32.6          | 21.5      | 27.5 | 75.4   | 50.0       | -             |  |
| Visual Prompt<br>(Bahng et al., 2022)                    | IN-V2              | 74.7         | -     | 10.8 | 36.3          | 22.3      | 34.1 | 54.9   | 29.2       | 43.9          |  |
|                                                          | IN-A               | 65.4         | 53.7  | -    | 29.7          | 15.9      | 33.0 | 41.7   | 18.0       | 32.1          |  |
|                                                          | IN-R               | 65.4         | 53.9  | 8.9  | -             | 33.9      | 28.7 | 52.8   | 37.5       | 35.0          |  |
|                                                          | IN-Sketch          | 70.5         | 58.0  | 8.3  | 48.3          | -         | 31.4 | 55.7   | 39.0       | 39.2          |  |
|                                                          | ObjNet             | 62.6         | 51.0  | 8.6  | 24.2          | 13.3      | -    | 34.7   | 11.1       | 26.8          |  |
|                                                          | IN-Cartoon         | 73.3         | 59.6  | 8.4  | 37.2          | 22.0      | 31.1 | -      | 28.4       | 36.0          |  |
|                                                          | IN-Drawing         | 71.0         | 58.5  | 5.9  | 38.3          | 24.3      | 28.0 | 55.8   | -          | 40.7          |  |
|                                                          | IN-C               | 76.1         | 63.5  | 11.9 | 36.3          | 23.2      | 35.0 | 57.0   | 40.1       | -             |  |
| LoRA<br>(Hu et al., 2021)                                | IN-V2              | 78.9         | -     | 13.8 | 37.3          | 26.0      | 34.0 | 63.3   | 37.4       | 53.5          |  |
|                                                          | IN-A               | 78.6         | 66.6  | -    | 37.7          | 25.6      | 36.2 | 61.4   | 36.9       | 53.5          |  |
|                                                          | IN-R               | 78.6         | 66.5  | 16.2 | -             | 28.9      | 36.0 | 64.2   | 40.1       | 52.8          |  |
|                                                          | IN-Sketch          | 78.7         | 66.5  | 14.8 | 47.7          | -         | 34.9 | 65.9   | 46.7       | 53.5          |  |
|                                                          | ObjNet             | 78.6         | 66.5  | 16.8 | 37.5          | 24.8      | -    | 61.0   | 36.5       | 53.0          |  |
|                                                          | IN-Cartoon         | 77.8         | 65.1  | 12.5 | 39.3          | 26.3      | 32.8 | -      | 37.4       | 51.3          |  |
|                                                          | IN-Drawing         | 78.1         | 66.2  | 13.4 | 42.0          | 29.4      | 34.1 | 63.7   | -          | 54.6          |  |
|                                                          | IN-C               | 79.2         | 66.8  | 13.9 | 38.1          | 25.9      | 34.6 | 64.5   | 38.6       | -             |  |
| EWC<br>(Kirkpatrick et al., 2017)                        | IN-V2              | 79.1         | -     | 19.8 | 40.1          | 26.8      | 37.6 | 62.7   | 39.5       | 55.4          |  |
|                                                          | IN-A               | 74.3         | 62.8  | -    | 38.3          | 25.2      | 37.2 | 54.5   | 32.2       | 51.4          |  |
|                                                          | IN-R               | 74.0         | 62.6  | 16.4 | -             | 42.3      | 33.6 | 64.4   | 51.6       | 51.8          |  |
|                                                          | IN-Sketch          | 77.7         | 65.7  | 14.9 | 54.0          | -         | 35.7 | 66.9   | 52.1       | 54.0          |  |
|                                                          | ObjNet             | 74.8         | 63.8  | 22.0 | 37.1          | 24.3      | -    | 52.3   | 32.4       | 51.7          |  |
|                                                          | IN-Cartoon         | 77.9         | 64.7  | 14.0 | 41.6          | 27.7      | 34.0 | -      | 39.8       | 49.1          |  |
|                                                          | IN-Drawing         | 77.4         | 65.3  | 12.5 | 41.7          | 29.8      | 33.3 | 63.8   | -          | 53.2          |  |
|                                                          | IN-C               | 79.4         | 67.0  | 17.2 | 39.4          | 26.6      | 37.1 | 62.2   | 46.6       | -             |  |
| LwF<br>(Li & Hoiem, 2017)                                | IN-V2              | 77.8         | -     | 17.5 | 38.6          | 26.0      | 35.2 | 61.5   | 37.5       | 53.5          |  |
|                                                          | IN-A               | 76.0         | 64.5  | -    | 37.7          | 25.0      | 33.7 | 58.5   | 35.0       | 51.7          |  |
|                                                          | IN-R               | 75.1         | 63.2  | 16.0 | -             | 42.9      | 32.3 | 63.7   | 48.1       | 51.8          |  |
|                                                          | IN-Sketch          | 74.5         | 62.3  | 11.6 | 55.3          | -         | 31.9 | 62.1   | 43.5       | 48.6          |  |
|                                                          | ObjNet             | 76.1         | 64.2  | 17.1 | 35.2          | 22.6      | -    | 56.8   | 31.9       | 50.4          |  |
|                                                          | IN-Cartoon         | 89.9         | 64.3  | 15.8 | 38.4          | 24.8      | 34.0 | -      | 39.4       | 52.6          |  |
|                                                          | IN-Drawing         | 83.1         | 60.6  | 11.4 | 36.9          | 26.1      | 29.5 | 60.8   | -          | 50.8          |  |
|                                                          | IN-C               | 99.5         | 63.0  | 10.4 | 37.0          | 23.7      | 29.9 | 90.1   | 60.9       | -             |  |
| LP-FT<br>(Kumar et al., 2022)                            | IN-V2              | 76.4         | -     | 20.4 | 38.6          | 25.6      | 36.1 | 59.3   | 37.5       | 52.3          |  |
|                                                          | IN-A               | 72.5         | 61.4  | -    | 35.2          | 23.9      | 34.2 | 53.4   | 32.3       | 48.6          |  |
|                                                          | IN-R               | 69.4         | 57.7  | 15.2 | -             | 41.0      | 31.7 | 57.9   | 43.6       | 46.6          |  |
|                                                          | IN-Sketch          | 72.7         | 60.9  | 13.5 | 57.3          | -         | 32.6 | 61.3   | 43.3       | 47.9          |  |
|                                                          | ObjNet             | 72.5         | 60.4  | 17.1 | 33.6          | 20.7      | -    | 51.3   | 26.4       | 46.6          |  |
|                                                          | IN-Cartoon         | 88.3         | 60.9  | 15.1 | 37.7          | 24.3      | 32.6 | -      | 40.9       | 47.2          |  |
|                                                          | IN-Drawing         | 79.7         | 57.5  | 10.4 | 36.7          | 25.6      | 27.1 | 58.5   | -          | 48.2          |  |
|                                                          | IN-C               | 99.9         | 52.8  | 7.1  | 30.5          | 17.7      | 21.5 | 93.5   | 73.3       | -             |  |
| WiSE-FT<br>(Wortsman et al., 2022b)                      | IN-V2              | 78.8         | -     | 18.9 | 39.5          | 27.2      | 36.2 | 63.0   | 39.4       | 55.0          |  |
|                                                          | IN-A               | 77.6         | 65.8  | -    | 39.2          | 26.9      | 37.4 | 61.2   | 36.9       | 54.2          |  |
|                                                          | IN-R               | 77.3         | 65.7  | 18.8 | -             | 43.1      | 36.6 | 67.2   | 52.0       | 55.3          |  |
|                                                          | IN-Sketch          | 77.6         | 66.1  | 14.3 | 53.7          | -         | 35.3 | 65.9   | 48.8       | 53.6          |  |
|                                                          | ObjNet             | 77.8         | 65.7  | 19.2 | 37.7          | 25.5      | -    | 60.3   | 35.3       | 53.5          |  |
|                                                          | IN-Cartoon         | 85.2         | 65.7  | 16.6 | 39.7          | 27.2      | 35.0 | -      | 43.1       | 52.9          |  |
|                                                          | IN-Drawing         | 82.5         | 65.0  | 14.0 | 40.2          | 29.9      | 33.5 | 64.7   | -          | 55.4          |  |
|                                                          | IN-C               | 94.2         | 64.9  | 13.9 | 38.7          | 26.0      | 33.1 | 82.7   | 58.0       | -             |  |
| Model Soup<br>PRE-FT-EWC-LwF<br>(Wortsman et al., 2022a) | IN-V2              | 78.9         | -     | 19.1 | 39.5          | 27.2      | 36.4 | 62.8   | 39.4       | 55.1          |  |
|                                                          | IN-A               | 77.1         | 65.4  | -    | 39.2          | 26.7      | 37.1 | 60.1   | 36.4       | 53.9          |  |
|                                                          | IN-R               | 77.2         | 65.5  | 19.0 | -             | 44.4      | 36.0 | 67.5   | 52.7       | 55.2          |  |
|                                                          | IN-Sketch          | 77.6         | 66.1  | 14.6 | 55.6          | -         | 35.4 | 66.4   | 49.7       | 53.6          |  |
|                                                          | ObjNet             | 77.7         | 65.9  | 20.1 | 37.9          | 25.5      | -    | 59.5   | 35.1       | 53.5          |  |
|                                                          | IN-Cartoon         | 84.9         | 65.9  | 16.2 | 40.4          | 27.4      | 34.9 | -      | 42.7       | 52.7          |  |
|                                                          | IN-Drawing         | 82.3         | 64.8  | 13.7 | 40.6          | 30.1      | 33.3 | 64.9   | -          | 55.1          |  |
|                                                          | IN-C               | 93.0         | 66.2  | 14.4 | 39.8          | 27.1      | 34.3 | 80.8   | 56.8       | -             |  |



Table S13: The accuracy on each OOD dataset after fine-tuning ImageNet-21K pretrained ViT-S/16 with AugReg on the downstream datasets with various methods. Note that ImageNet-Drawing, ImageNet-Cartoon, and ImageNet-C are generated from the ImageNet validation set. Green and red indicate relative performance increases and decreases, respectively, compared to the pretrained model. Bold indicates the best performance on each evaluation dataset.

| Method                                                   | Downstream Dataset | $D_{pre}$<br>IN | IN-V2 | IN-A | Realistic OOD<br>IN-R | IN-Sketch | ObjNet | IN-Cartoon | Synthetic OOD<br>IN-Drawing | IN-C |
|----------------------------------------------------------|--------------------|-----------------|-------|------|-----------------------|-----------|--------|------------|-----------------------------|------|
| Pretrained                                               |                    | 81.4            | 70.3  | 27.0 | 46.0                  | 32.9      | 41.3   | 67.8       | 37.7                        | 58.0 |
| FT                                                       | IN-V2              | 78.9            | -     | 34.3 | 46.1                  | 30.5      | 43.2   | 63.9       | 34.4                        | 56.8 |
|                                                          | IN-A               | 73.2            | 62.8  | -    | 43.7                  | 30.4      | 41.5   | 55.4       | 29.7                        | 52.7 |
|                                                          | IN-R               | 70.5            | 60.5  | 26.4 | -                     | 48.0      | 37.0   | 60.5       | 46.2                        | 50.6 |
|                                                          | IN-Sketch          | 74.4            | 63.1  | 25.2 | 63.3                  | -         | 39.1   | 62.5       | 47.2                        | 50.7 |
|                                                          | ObjNet             | 73.3            | 61.6  | 28.9 | 38.3                  | 26.3      | -      | 52.7       | 24.0                        | 48.5 |
|                                                          | IN-Cartoon         | 87.6            | 64.4  | 26.5 | 45.1                  | 31.1      | 40.0   | -          | 41.2                        | 52.2 |
|                                                          | IN-Drawing         | 83.1            | 62.2  | 20.3 | 45.1                  | 33.1      | 36.3   | 64.9       | -                           | 52.8 |
|                                                          | IN-C               | 99.8            | 59.8  | 15.9 | 39.4                  | 25.2      | 32.0   | 91.7       | 71.3                        | -    |
| Linear Probing                                           | IN-V2              | 80.9            | -     | 28.2 | 46.1                  | 32.5      | 41.0   | 67.1       | 37.1                        | 57.7 |
|                                                          | IN-A               | 80.0            | 69.1  | -    | 45.6                  | 32.2      | 41.6   | 66.2       | 36.4                        | 57.2 |
|                                                          | IN-R               | 80.1            | 69.5  | 27.9 | -                     | 35.5      | 40.5   | 66.3       | 38.2                        | 56.8 |
|                                                          | IN-Sketch          | 77.5            | 67.0  | 27.7 | 54.5                  | -         | 40.8   | 64.6       | 40.4                        | 55.1 |
|                                                          | ObjNet             | 80.2            | 69.5  | 28.9 | 45.6                  | 32.0      | -      | 66.5       | 37.1                        | 57.9 |
|                                                          | IN-Cartoon         | 85.1            | 68.8  | 26.4 | 46.5                  | 32.5      | 40.7   | -          | 41.0                        | 59.3 |
|                                                          | IN-Drawing         | 82.5            | 68.8  | 26.9 | 47.4                  | 34.1      | 40.0   | 70.4       | -                           | 60.0 |
|                                                          | IN-C               | 95.6            | 60.4  | 21.4 | 39.8                  | 25.9      | 32.8   | 81.7       | 52.3                        | -    |
| Visual Prompt<br>(Bahng et al., 2022)                    | IN-V2              | 77.0            | -     | 22.2 | 42.7                  | 28.1      | 41.8   | 58.4       | 29.9                        | 47.9 |
|                                                          | IN-A               | 69.3            | 58.7  | -    | 38.5                  | 22.2      | 40.2   | 48.1       | 21.8                        | 39.6 |
|                                                          | IN-R               | 66.9            | 56.4  | 15.7 | -                     | 38.4      | 32.3   | 53.0       | 38.8                        | 38.1 |
|                                                          | IN-Sketch          | 73.0            | 61.3  | 15.3 | 55.7                  | -         | 38.3   | 58.3       | 42.1                        | 42.1 |
|                                                          | ObjNet             | 64.1            | 52.7  | 15.1 | 27.2                  | 16.5      | -      | 35.4       | 14.4                        | 29.1 |
|                                                          | IN-Cartoon         | 75.2            | 62.2  | 17.8 | 41.6                  | 26.8      | 37.7   | -          | 29.3                        | 39.7 |
|                                                          | IN-Drawing         | 72.9            | 60.9  | 13.2 | 42.2                  | 27.5      | 35.7   | 55.8       | -                           | 41.0 |
|                                                          | IN-C               | 78.1            | 66.6  | 23.1 | 42.7                  | 28.1      | 41.1   | 60.9       | 41.0                        | -    |
| LoRA<br>(Hu et al., 2021)                                | IN-V2              | 81.5            | -     | 27.2 | 45.9                  | 32.8      | 41.6   | 67.8       | 37.7                        | 58.2 |
|                                                          | IN-A               | 81.5            | 70.7  | -    | 46.2                  | 32.8      | 43.0   | 67.8       | 37.7                        | 58.9 |
|                                                          | IN-R               | 81.4            | 70.6  | 29.1 | -                     | 34.9      | 43.3   | 68.5       | 40.7                        | 58.2 |
|                                                          | IN-Sketch          | 81.3            | 70.3  | 28.1 | 54.0                  | -         | 42.1   | 68.6       | 46.0                        | 58.3 |
|                                                          | ObjNet             | 81.5            | 70.8  | 29.2 | 46.3                  | 32.3      | -      | 67.6       | 38.0                        | 58.8 |
|                                                          | IN-Cartoon         | 81.4            | 70.2  | 27.3 | 47.0                  | 33.1      | 41.6   | -          | 38.6                        | 57.7 |
|                                                          | IN-Drawing         | 81.4            | 70.5  | 27.7 | 49.7                  | 36.7      | 42.4   | 68.5       | -                           | 59.0 |
|                                                          | IN-C               | 68.9            | 56.6  | 8.0  | 26.4                  | 15.9      | 27.3   | 42.4       | 9.4                         | -    |
| EWC<br>(Kirkpatrick et al., 2017)                        | IN-V2              | 81.6            | -     | 33.2 | 48.2                  | 33.3      | 44.6   | 67.1       | 38.4                        | 59.7 |
|                                                          | IN-A               | 78.9            | 68.3  | -    | 47.2                  | 33.0      | 45.4   | 62.7       | 33.9                        | 58.0 |
|                                                          | IN-R               | 78.1            | 67.3  | 30.3 | -                     | 47.5      | 41.1   | 68.1       | 53.4                        | 56.4 |
|                                                          | IN-Sketch          | 80.6            | 69.7  | 29.1 | 60.0                  | -         | 42.9   | 69.8       | 52.4                        | 58.0 |
|                                                          | ObjNet             | 78.8            | 68.0  | 34.5 | 44.5                  | 30.9      | -      | 59.2       | 34.3                        | 56.7 |
|                                                          | IN-Cartoon         | 81.0            | 68.9  | 28.4 | 48.6                  | 32.9      | 42.0   | -          | 42.6                        | 55.2 |
|                                                          | IN-Drawing         | 80.7            | 69.0  | 26.7 | 50.0                  | 37.1      | 41.3   | 68.3       | -                           | 58.1 |
|                                                          | IN-C               | 81.8            | 71.0  | 31.2 | 47.5                  | 33.2      | 43.2   | 67.4       | 48.6                        | -    |
| LwF<br>(Li & Hoiem, 2017)                                | IN-V2              | 80.7            | -     | 31.4 | 46.3                  | 31.8      | 42.6   | 67.1       | 36.7                        | 58.3 |
|                                                          | IN-A               | 80.0            | 69.3  | -    | 46.2                  | 31.6      | 42.1   | 64.5       | 37.0                        | 57.8 |
|                                                          | IN-R               | 79.5            | 68.3  | 28.4 | -                     | 47.5      | 39.4   | 68.4       | 48.3                        | 57.2 |
|                                                          | IN-Sketch          | 77.8            | 66.2  | 25.4 | 60.9                  | -         | 40.9   | 66.1       | 43.8                        | 54.5 |
|                                                          | ObjNet             | 79.1            | 67.3  | 30.7 | 42.2                  | 29.6      | -      | 61.7       | 31.1                        | 55.1 |
|                                                          | IN-Cartoon         | 90.4            | 68.8  | 26.9 | 46.9                  | 33.2      | 41.7   | -          | 42.2                        | 60.0 |
|                                                          | IN-Drawing         | 86.7            | 66.5  | 21.9 | 46.0                  | 34.7      | 38.6   | 68.5       | -                           | 57.8 |
|                                                          | IN-C               | 99.8            | 64.7  | 17.1 | 43.4                  | 29.0      | 36.0   | 91.6       | 65.1                        | -    |
| LP-FT<br>(Kumar et al., 2022)                            | IN-V2              | 79.4            | -     | 34.2 | 46.6                  | 31.3      | 43.1   | 65.2       | 36.3                        | 57.6 |
|                                                          | IN-A               | 77.0            | 67.0  | -    | 44.3                  | 31.5      | 42.7   | 60.3       | 32.2                        | 56.0 |
|                                                          | IN-R               | 75.4            | 65.0  | 27.6 | -                     | 47.4      | 39.5   | 64.3       | 49.1                        | 53.5 |
|                                                          | IN-Sketch          | 75.0            | 63.9  | 27.5 | 62.8                  | -         | 40.6   | 64.1       | 44.9                        | 52.3 |
|                                                          | ObjNet             | 77.4            | 66.1  | 31.5 | 41.4                  | 27.9      | -      | 59.2       | 28.0                        | 53.4 |
|                                                          | IN-Cartoon         | 89.3            | 65.3  | 27.2 | 45.8                  | 31.8      | 40.9   | -          | 42.8                        | 56.0 |
|                                                          | IN-Drawing         | 85.3            | 63.4  | 21.5 | 46.7                  | 34.9      | 37.5   | 67.9       | -                           | 55.5 |
|                                                          | IN-C               | 99.9            | 56.4  | 12.0 | 38.3                  | 23.3      | 27.6   | 94.5       | 75.6                        | -    |
| WiSE-FT<br>(Wortsman et al., 2022b)                      | IN-V2              | 81.3            | -     | 33.4 | 47.6                  | 33.4      | 44.0   | 67.6       | 38.1                        | 59.3 |
|                                                          | IN-A               | 80.6            | 69.8  | -    | 47.7                  | 33.9      | 45.4   | 66.1       | 38.0                        | 58.9 |
|                                                          | IN-R               | 79.9            | 69.8  | 32.6 | -                     | 48.5      | 43.8   | 70.4       | 53.2                        | 59.6 |
|                                                          | IN-Sketch          | 80.0            | 69.2  | 29.3 | 60.7                  | -         | 42.6   | 69.6       | 49.8                        | 58.0 |
|                                                          | ObjNet             | 80.5            | 69.3  | 33.1 | 45.6                  | 32.5      | -      | 65.7       | 35.0                        | 57.6 |
|                                                          | IN-Cartoon         | 86.7            | 69.5  | 30.2 | 47.7                  | 34.0      | 43.1   | -          | 43.9                        | 58.4 |
|                                                          | IN-Drawing         | 85.1            | 69.0  | 27.7 | 49.4                  | 37.8      | 42.5   | 70.8       | -                           | 60.4 |
|                                                          | IN-C               | 93.8            | 68.7  | 26.5 | 47.1                  | 32.5      | 41.5   | 83.6       | 58.7                        | -    |
| Model Soup<br>PRE-FT-EWC-LwF<br>(Wortsman et al., 2022a) | IN-V2              | 81.4            | -     | 33.3 | 47.6                  | 33.3      | 43.8   | 67.6       | 38.0                        | 59.3 |
|                                                          | IN-A               | 80.4            | 69.8  | -    | 47.7                  | 33.6      | 45.1   | 65.6       | 37.6                        | 58.9 |
|                                                          | IN-R               | 80.3            | 69.9  | 32.6 | -                     | 49.1      | 43.2   | 70.7       | 53.8                        | 59.4 |
|                                                          | IN-Sketch          | 80.0            | 69.2  | 29.2 | 61.5                  | -         | 42.6   | 69.7       | 49.9                        | 57.9 |
|                                                          | ObjNet             | 80.4            | 69.2  | 33.8 | 45.3                  | 32.3      | -      | 64.6       | 35.3                        | 57.6 |
|                                                          | IN-Cartoon         | 86.4            | 69.6  | 29.7 | 48.2                  | 34.1      | 42.9   | -          | 43.9                        | 58.6 |
|                                                          | IN-Drawing         | 85.0            | 69.2  | 27.0 | 49.2                  | 37.8      | 41.9   | 70.6       | -                           | 60.2 |
|                                                          | IN-C               | 94.2            | 69.3  | 27.2 | 48.0                  | 34.0      | 41.9   | 84.1       | 59.7                        | -    |

Table S14: The accuracy on each OOD dataset after fine-tuning ImageNet-21K pretrained ViT-S/32 with AugReg on the downstream datasets with various methods. Note that ImageNet-Drawing, ImageNet-Cartoon, and ImageNet-C are generated from the ImageNet validation set. Green and red indicate relative performance increases and decreases, respectively, compared to the pretrained model. Bold indicates the best performance on each evaluation dataset.

| Method                                                   | Downstream Dataset | $D_{pre}$<br>IN | IN-V2 | IN-A | Realistic OOD |           |        | ObjNet     | Synthetic OOD |      |  |
|----------------------------------------------------------|--------------------|-----------------|-------|------|---------------|-----------|--------|------------|---------------|------|--|
|                                                          |                    | IN              | IN-V2 | IN-A | IN-R          | IN-Sketch | ObjNet | IN-Cartoon | IN-Drawing    | IN-C |  |
| Pretrained                                               |                    | 76.0            | 63.9  | 11.5 | 39.7          | 26.2      | 33.1   | 62.9       | 34.3          | 52.0 |  |
| FT                                                       | IN-V2              | 72.2            | -     | 17.3 | 38.2          | 23.4      | 34.0   | 56.9       | 31.2          | 50.1 |  |
|                                                          | IN-A               | 64.3            | 53.7  | -    | 33.3          | 20.9      | 31.9   | 46.9       | 24.7          | 44.0 |  |
|                                                          | IN-R               | 62.4            | 51.6  | 14.1 | -             | 42.7      | 29.1   | 53.2       | 40.5          | 43.4 |  |
|                                                          | IN-Sketch          | 67.2            | 55.1  | 12.0 | 56.9          | -         | 30.4   | 56.7       | 41.7          | 45.5 |  |
|                                                          | ObjNet             | 64.9            | 53.4  | 14.2 | 31.7          | 18.3      | -      | 44.7       | 21.5          | 41.7 |  |
|                                                          | IN-Cartoon         | 84.6            | 56.2  | 12.8 | 38.7          | 24.6      | 30.3   | -          | 35.6          | 45.2 |  |
|                                                          | IN-Drawing         | 75.4            | 53.0  | 9.6  | 38.0          | 26.1      | 25.8   | 55.9       | -             | 46.9 |  |
|                                                          | IN-C               | 99.7            | 52.1  | 8.1  | 32.9          | 19.8      | 24.2   | 92.9       | 71.0          | -    |  |
| Linear Probing                                           | IN-V2              | 75.3            | -     | 12.7 | 39.4          | 26.0      | 32.7   | 62.3       | 34.1          | 51.5 |  |
|                                                          | IN-A               | 73.5            | 61.6  | -    | 38.5          | 25.2      | 32.3   | 60.7       | 32.6          | 50.4 |  |
|                                                          | IN-R               | 74.6            | 62.5  | 13.0 | -             | 28.8      | 32.4   | 62.1       | 34.5          | 51.5 |  |
|                                                          | IN-Sketch          | 71.5            | 60.1  | 13.3 | 49.2          | -         | 33.1   | 59.6       | 36.6          | 49.6 |  |
|                                                          | ObjNet             | 74.5            | 62.9  | 12.7 | 40.1          | 26.3      | -      | 61.6       | 33.1          | 52.1 |  |
|                                                          | IN-Cartoon         | 80.6            | 61.6  | 11.4 | 40.8          | 26.1      | 32.4   | -          | 38.2          | 53.5 |  |
|                                                          | IN-Drawing         | 77.3            | 61.1  | 11.3 | 40.8          | 27.4      | 30.3   | 65.5       | -             | 53.6 |  |
|                                                          | IN-C               | 93.6            | 52.2  | 10.7 | 33.5          | 20.6      | 25.3   | 79.2       | 49.0          | -    |  |
| Visual Prompt<br>(Bahng et al., 2022)                    | IN-V2              | 69.9            | -     | 9.6  | 36.9          | 22.5      | 33.1   | 53.6       | 28.5          | 42.6 |  |
|                                                          | IN-A               | 48.5            | 38.5  | -    | 24.9          | 8.8       | 22.0   | 31.2       | 12.4          | 23.2 |  |
|                                                          | IN-R               | 58.5            | 48.0  | 6.7  | -             | 31.1      | 25.5   | 46.2       | 34.4          | 32.3 |  |
|                                                          | IN-Sketch          | 64.5            | 52.5  | 6.3  | 48.1          | -         | 28.2   | 51.0       | 37.0          | 35.1 |  |
|                                                          | ObjNet             | 53.5            | 42.9  | 7.2  | 23.9          | 12.2      | -      | 31.8       | 14.1          | 24.5 |  |
|                                                          | IN-Cartoon         | 69.0            | 56.1  | 7.4  | 38.0          | 22.3      | 30.0   | -          | 30.6          | 36.0 |  |
|                                                          | IN-Drawing         | 63.6            | 51.3  | 5.5  | 37.8          | 22.9      | 25.3   | 49.5       | -             | 36.6 |  |
|                                                          | IN-C               | 71.2            | 59.4  | 9.8  | 36.9          | 22.5      | 33.5   | 55.2       | 35.6          | -    |  |
| LoRA<br>(Hu et al., 2021)                                | IN-V2              | 76.0            | -     | 11.6 | 39.7          | 26.2      | 33.2   | 62.9       | 34.3          | 52.1 |  |
|                                                          | IN-A               | 76.1            | 64.0  | -    | 40.3          | 26.5      | 34.1   | 63.0       | 34.1          | 53.1 |  |
|                                                          | IN-R               | 76.1            | 64.1  | 12.4 | -             | 27.8      | 34.7   | 63.8       | 35.8          | 52.8 |  |
|                                                          | IN-Sketch          | 75.7            | 63.5  | 12.7 | 48.1          | -         | 34.1   | 63.8       | 41.5          | 52.9 |  |
|                                                          | ObjNet             | 76.1            | 64.0  | 12.5 | 40.6          | 26.6      | -      | 63.1       | 33.9          | 53.3 |  |
|                                                          | IN-Cartoon         | 75.9            | 63.7  | 11.7 | 40.7          | 26.6      | 33.7   | -          | 35.0          | 51.4 |  |
|                                                          | IN-Drawing         | 75.5            | 63.5  | 10.9 | 43.7          | 30.2      | 32.8   | 63.4       | -             | 52.3 |  |
|                                                          | IN-C               | 74.1            | 62.0  | 9.3  | 36.9          | 23.5      | 30.2   | 58.4       | 30.5          | -    |  |
| EWC<br>(Kirkpatrick et al., 2017)                        | IN-V2              | 76.0            | -     | 15.8 | 41.0          | 26.1      | 36.0   | 62.1       | 35.4          | 53.6 |  |
|                                                          | IN-A               | 70.9            | 59.1  | -    | 38.3          | 24.0      | 35.8   | 54.9       | 28.1          | 50.2 |  |
|                                                          | IN-R               | 71.8            | 60.4  | 14.5 | -             | 41.4      | 32.6   | 61.9       | 47.4          | 50.7 |  |
|                                                          | IN-Sketch          | 74.9            | 62.9  | 13.2 | 53.4          | -         | 34.6   | 64.7       | 45.5          | 52.6 |  |
|                                                          | ObjNet             | 72.5            | 60.9  | 17.9 | 38.7          | 24.8      | -      | 55.2       | 31.6          | 50.7 |  |
|                                                          | IN-Cartoon         | 75.0            | 61.8  | 11.7 | 42.4          | 26.9      | 33.1   | -          | 37.3          | 48.8 |  |
|                                                          | IN-Drawing         | 74.2            | 61.9  | 11.6 | 43.7          | 29.8      | 33.0   | 61.8       | -             | 52.3 |  |
|                                                          | IN-C               | 76.2            | 64.0  | 14.3 | 41.4          | 27.0      | 35.8   | 62.3       | 42.6          | -    |  |
| LwF<br>(Li & Hoiem, 2017)                                | IN-V2              | 75.0            | -     | 14.9 | 39.4          | 25.3      | 33.6   | 60.8       | 32.9          | 51.8 |  |
|                                                          | IN-A               | 73.1            | 61.1  | -    | 38.2          | 24.4      | 33.6   | 57.7       | 31.5          | 50.8 |  |
|                                                          | IN-R               | 72.9            | 60.7  | 14.1 | -             | 42.6      | 31.6   | 62.4       | 44.2          | 50.9 |  |
|                                                          | IN-Sketch          | 71.2            | 59.1  | 11.9 | 55.3          | -         | 32.6   | 60.0       | 40.5          | 48.9 |  |
|                                                          | ObjNet             | 71.1            | 59.7  | 15.5 | 36.2          | 21.6      | -      | 54.3       | 27.2          | 48.2 |  |
|                                                          | IN-Cartoon         | 88.0            | 61.5  | 12.6 | 40.3          | 26.4      | 32.1   | -          | 37.8          | 53.7 |  |
|                                                          | IN-Drawing         | 81.4            | 58.2  | 10.6 | 39.1          | 27.4      | 28.8   | 62.2       | -             | 52.1 |  |
|                                                          | IN-C               | 98.7            | 60.0  | 8.9  | 38.2          | 24.1      | 29.1   | 89.2       | 55.7          | -    |  |
| LP-FT<br>(Kumar et al., 2022)                            | IN-V2              | 73.2            | -     | 17.4 | 39.0          | 24.5      | 33.9   | 58.4       | 32.1          | 50.7 |  |
|                                                          | IN-A               | 69.2            | 58.2  | -    | 35.0          | 22.9      | 33.4   | 53.9       | 28.6          | 48.2 |  |
|                                                          | IN-R               | 68.5            | 56.8  | 14.2 | -             | 42.5      | 32.3   | 58.0       | 43.2          | 47.5 |  |
|                                                          | IN-Sketch          | 67.8            | 56.5  | 13.0 | 57.3          | -         | 32.0   | 57.6       | 39.9          | 46.9 |  |
|                                                          | ObjNet             | 70.2            | 58.2  | 14.8 | 35.8          | 21.4      | -      | 53.1       | 24.6          | 47.0 |  |
|                                                          | IN-Cartoon         | 87.3            | 57.7  | 13.2 | 39.2          | 25.2      | 31.2   | -          | 37.8          | 50.1 |  |
|                                                          | IN-Drawing         | 79.1            | 55.2  | 10.7 | 38.5          | 26.9      | 26.3   | 60.0       | -             | 50.3 |  |
|                                                          | IN-C               | 99.8            | 48.0  | 6.9  | 30.8          | 18.0      | 20.7   | 94.6       | 73.5          | -    |  |
| WiSE-FT<br>(Wortsman et al., 2022b)                      | IN-V2              | 75.7            | -     | 15.7 | 40.3          | 26.3      | 35.3   | 62.0       | 35.0          | 53.1 |  |
|                                                          | IN-A               | 74.5            | 62.9  | -    | 40.0          | 26.1      | 36.6   | 60.2       | 34.2          | 52.8 |  |
|                                                          | IN-R               | 74.0            | 62.8  | 16.2 | -             | 42.2      | 35.3   | 64.7       | 47.5          | 53.3 |  |
|                                                          | IN-Sketch          | 74.2            | 62.2  | 13.1 | 54.4          | -         | 34.1   | 63.9       | 44.2          | 52.1 |  |
|                                                          | ObjNet             | 74.5            | 62.6  | 15.9 | 39.1          | 25.4      | -      | 59.5       | 32.2          | 51.8 |  |
|                                                          | IN-Cartoon         | 83.0            | 62.6  | 13.6 | 41.0          | 27.1      | 33.7   | -          | 39.0          | 51.8 |  |
|                                                          | IN-Drawing         | 79.8            | 61.8  | 12.2 | 42.4          | 30.0      | 32.4   | 64.5       | -             | 54.3 |  |
|                                                          | IN-C               | 93.0            | 61.8  | 12.8 | 40.4          | 26.7      | 32.4   | 83.5       | 56.9          | -    |  |
| Model Soup<br>PRE-FT-EWC-LwF<br>(Wortsman et al., 2022a) | IN-V2              | 75.7            | -     | 15.6 | 40.4          | 26.3      | 35.3   | 61.9       | 35.0          | 53.1 |  |
|                                                          | IN-A               | 74.2            | 62.4  | -    | 39.6          | 25.7      | 36.3   | 59.2       | 33.0          | 52.5 |  |
|                                                          | IN-R               | 74.3            | 62.8  | 16.0 | -             | 43.4      | 34.8   | 64.9       | 48.0          | 53.2 |  |
|                                                          | IN-Sketch          | 74.2            | 62.3  | 13.0 | 55.5          | -         | 34.4   | 64.0       | 44.6          | 52.2 |  |
|                                                          | ObjNet             | 74.1            | 62.6  | 17.2 | 39.1          | 25.3      | -      | 58.4       | 32.0          | 51.7 |  |
|                                                          | IN-Cartoon         | 82.5            | 62.6  | 13.1 | 41.6          | 27.3      | 33.4   | -          | 39.0          | 52.0 |  |
|                                                          | IN-Drawing         | 79.6            | 61.7  | 12.3 | 42.5          | 30.1      | 32.1   | 64.4       | -             | 54.2 |  |
|                                                          | IN-C               | 91.5            | 63.1  | 13.2 | 41.2          | 27.3      | 33.3   | 81.0       | 54.5          | -    |  |



Table S15: The accuracy on each OOD dataset after fine-tuning ImageNet-21K pretrained ViT-L/16 with AugReg on the downstream datasets with various methods. Note that ImageNet-Drawing, ImageNet-Cartoon, and ImageNet-C are generated from the ImageNet validation set. Green and red indicate relative performance increases and decreases, respectively, compared to the pretrained model. Bold indicates the best performance on each evaluation dataset.

| Method                                                   | Downstream Dataset | $D_{pre}$ IN | IN-V2 | IN-A | Realistic OOD | IN-Sketch | ObjNet | IN-Cartoon | Synthetic OOD | IN-C |      |
|----------------------------------------------------------|--------------------|--------------|-------|------|---------------|-----------|--------|------------|---------------|------|------|
| Pretrained                                               |                    |              | 85.8  | 76.2 | 55.5          | 64.4      | 51.8   | 52.8       | 79.5          | 64.6 | 72.2 |
| FT                                                       | IN-V2              | 83.8         | -     | 59.7 | 66.2          | 51.0      | 54.1   | 77.0       | 63.9          | 71.0 |      |
|                                                          | IN-A               | 81.9         | 24.4  | -    | 66.1          | 51.0      | 52.3   | 75.1       | 61.4          | 70.4 |      |
|                                                          | IN-R               | 79.4         | 69.8  | 48.8 | -             | 58.8      | 48.9   | 72.6       | 63.8          | 65.4 |      |
|                                                          | IN-Sketch          | 81.6         | 72.8  | 52.0 | 76.3          | -         | 52.5   | 75.6       | 64.7          | 67.6 |      |
|                                                          | ObjNet             | 82.3         | 73.2  | 58.2 | 62.0          | 50.4      | -      | 74.5       | 56.2          | 68.4 |      |
|                                                          | IN-Cartoon         | 96.1         | 72.7  | 52.1 | 63.2          | 50.8      | 50.5   | -          | 70.4          | 72.6 |      |
|                                                          | IN-Drawing         | 93.8         | 72.2  | 46.4 | 65.4          | 52.5      | 49.9   | 85.1       | -             | 74.7 |      |
|                                                          | IN-C               | 99.9         | 70.1  | 37.9 | 58.7          | 45.8      | 44.0   | 98.8       | 89.9          | -    |      |
| Linear Probing                                           | IN-V2              | 85.0         | -     | 57.1 | 64.1          | 51.2      | 51.9   | 78.4       | 63.5          | 71.4 |      |
|                                                          | IN-A               | 84.9         | 49.8  | -    | 64.8          | 51.3      | 53.4   | 78.5       | 63.5          | 71.4 |      |
|                                                          | IN-R               | 83.9         | 43.5  | 56.3 | -             | 50.7      | 51.1   | 76.5       | 61.7          | 69.8 |      |
|                                                          | IN-Sketch          | 82.1         | 72.9  | 55.3 | 70.0          | -         | 53.2   | 75.6       | 61.3          | 68.4 |      |
|                                                          | ObjNet             | 84.8         | 75.0  | 58.2 | 63.3          | 50.9      | -      | 78.3       | 63.6          | 71.5 |      |
|                                                          | IN-Cartoon         | 92.6         | 74.8  | 56.0 | 63.8          | 50.6      | 52.7   | -          | 68.5          | 76.5 |      |
|                                                          | IN-Drawing         | 89.1         | 75.1  | 55.0 | 64.3          | 51.2      | 51.7   | 84.1       | -             | 76.0 |      |
|                                                          | IN-C               | 99.6         | 69.6  | 49.3 | 59.2          | 45.6      | 45.6   | 96.7       | 84.1          | -    |      |
| Visual Prompt<br>(Bahng et al., 2022)                    | IN-V2              | 80.3         | -     | 39.4 | 56.9          | 42.1      | 49.8   | 70.2       | 50.1          | 57.4 |      |
|                                                          | IN-A               | 77.2         | 66.8  | -    | 52.6          | 37.2      | 51.1   | 64.8       | 43.4          | 50.5 |      |
|                                                          | IN-R               | 75.3         | 64.8  | 34.8 | -             | 47.4      | 45.2   | 64.9       | 50.7          | 50.3 |      |
|                                                          | IN-Sketch          | 73.3         | 62.8  | 25.7 | 63.5          | -         | 43.8   | 64.5       | 51.2          | 48.6 |      |
|                                                          | ObjNet             | 77.4         | 66.9  | 40.8 | 52.1          | 36.1      | -      | 62.8       | 38.8          | 47.7 |      |
|                                                          | IN-Cartoon         | 80.2         | 69.3  | 37.9 | 58.9          | 43.1      | 47.5   | -          | 52.2          | 55.8 |      |
|                                                          | IN-Drawing         | 76.0         | 65.2  | 28.3 | 57.0          | 40.5      | 44.0   | 65.8       | -             | 52.2 |      |
|                                                          | IN-C               | 81.1         | 70.5  | 42.8 | 54.3          | 41.5      | 51.3   | 69.9       | 51.8          | -    |      |
| LoRA<br>(Hu et al., 2021)                                | IN-V2              | 85.9         | -     | 56.2 | 64.5          | 51.9      | 53.3   | 79.5       | 64.8          | 72.3 |      |
|                                                          | IN-A               | 85.9         | 76.6  | -    | 65.1          | 52.0      | 55.4   | 79.5       | 65.0          | 72.9 |      |
|                                                          | IN-R               | 85.9         | 76.6  | 58.8 | -             | 52.5      | 55.2   | 79.5       | 65.3          | 72.6 |      |
|                                                          | IN-Sketch          | 85.9         | 76.4  | 58.0 | 67.0          | -         | 54.7   | 79.6       | 65.6          | 72.5 |      |
|                                                          | ObjNet             | 85.8         | 76.3  | 59.9 | 65.3          | 52.0      | -      | 79.3       | 64.9          | 72.9 |      |
|                                                          | IN-Cartoon         | 85.9         | 76.3  | 57.7 | 65.0          | 51.6      | 54.4   | -          | 64.8          | 72.5 |      |
|                                                          | IN-Drawing         | 85.8         | 76.4  | 58.1 | 65.8          | 52.4      | 54.8   | 79.7       | -             | 73.0 |      |
|                                                          | IN-C               | 86.7         | 76.5  | 58.0 | 65.3          | 52.3      | 55.0   | 80.6       | 69.2          | -    |      |
| EWC<br>(Kirkpatrick et al., 2017)                        | IN-V2              | 84.3         | -     | 52.7 | 66.7          | 51.3      | 51.9   | 77.6       | 65.1          | 71.0 |      |
|                                                          | IN-A               | 84.2         | 75.8  | -    | 67.9          | 51.8      | 57.0   | 77.0       | 62.4          | 72.0 |      |
|                                                          | IN-R               | 84.6         | 75.3  | 62.7 | -             | 60.0      | 55.0   | 77.9       | 67.7          | 72.0 |      |
|                                                          | IN-Sketch          | 85.2         | 76.0  | 57.0 | 74.3          | -         | 54.8   | 79.3       | 67.8          | 72.4 |      |
|                                                          | ObjNet             | 83.6         | 74.4  | 61.4 | 64.3          | 51.6      | -      | 75.3       | 61.4          | 71.2 |      |
|                                                          | IN-Cartoon         | 86.2         | 76.1  | 58.7 | 66.0          | 52.1      | 54.2   | -          | 66.9          | 71.8 |      |
|                                                          | IN-Drawing         | 86.2         | 76.5  | 57.4 | 67.1          | 53.2      | 55.1   | 80.2       | -             | 73.5 |      |
|                                                          | IN-C               | 87.4         | 76.4  | 57.5 | 65.8          | 52.5      | 53.1   | 81.7       | 71.2          | -    |      |
| LwF<br>(Li & Hoiem, 2017)                                | IN-V2              | 84.9         | -     | 55.8 | 65.1          | 50.6      | 52.6   | 78.2       | 63.1          | 71.3 |      |
|                                                          | IN-A               | 85.2         | 76.0  | -    | 66.8          | 51.5      | 54.9   | 78.8       | 64.5          | 72.0 |      |
|                                                          | IN-R               | 85.1         | 56.9  | 57.0 | -             | 59.8      | 48.0   | 78.9       | 67.5          | 71.4 |      |
|                                                          | IN-Sketch          | 83.6         | 74.2  | 53.4 | 74.5          | -         | 53.1   | 77.9       | 65.4          | 70.2 |      |
|                                                          | ObjNet             | 85.0         | 75.4  | 60.5 | 64.6          | 51.2      | -      | 77.8       | 61.7          | 71.5 |      |
|                                                          | IN-Cartoon         | 97.2         | 74.0  | 47.3 | 65.0          | 50.4      | 49.9   | -          | 71.2          | 75.5 |      |
|                                                          | IN-Drawing         | 94.5         | 70.0  | 43.2 | 66.6          | 53.1      | 42.7   | 87.6       | -             | 76.6 |      |
|                                                          | IN-C               | 99.9         | 72.4  | 41.5 | 63.1          | 50.0      | 47.4   | 98.9       | 89.4          | -    |      |
| LP-FT<br>(Kumar et al., 2022)                            | IN-V2              | 84.6         | -     | 59.9 | 65.8          | 52.1      | 53.6   | 78.0       | 63.6          | 71.4 |      |
|                                                          | IN-A               | 67.4         | 58.1  | -    | 57.0          | 40.5      | 50.8   | 59.2       | 44.5          | 53.7 |      |
|                                                          | IN-R               | 63.1         | 55.1  | 43.9 | -             | 40.6      | 46.5   | 55.3       | 47.2          | 49.4 |      |
|                                                          | IN-Sketch          | 81.5         | 72.5  | 54.4 | 74.6          | -         | 53.7   | 75.6       | 62.7          | 67.8 |      |
|                                                          | ObjNet             | 83.9         | 74.1  | 61.1 | 64.2          | 50.7      | -      | 76.9       | 60.8          | 70.6 |      |
|                                                          | IN-Cartoon         | 96.2         | 74.2  | 55.7 | 64.4          | 51.5      | 52.6   | -          | 71.4          | 77.0 |      |
|                                                          | IN-Drawing         | 93.4         | 73.7  | 51.2 | 65.2          | 52.5      | 51.2   | 87.1       | -             | 77.5 |      |
|                                                          | IN-C               | 99.9         | 69.6  | 44.5 | 59.0          | 45.0      | 44.6   | 98.3       | 89.7          | -    |      |
| WiSE-FT<br>(Wortsman et al., 2022b)                      | IN-V2              | 85.7         | -     | 61.9 | 66.3          | 52.2      | 55.9   | 79.3       | 66.0          | 73.5 |      |
|                                                          | IN-A               | 84.7         | 75.3  | -    | 66.2          | 51.6      | 55.4   | 78.6       | 63.7          | 71.5 |      |
|                                                          | IN-R               | 85.1         | 76.1  | 61.5 | -             | 60.9      | 55.7   | 79.2       | 69.4          | 73.0 |      |
|                                                          | IN-Sketch          | 85.0         | 76.2  | 57.9 | 74.4          | -         | 55.2   | 79.5       | 67.8          | 72.1 |      |
|                                                          | ObjNet             | 85.3         | 76.2  | 62.5 | 65.4          | 52.8      | -      | 78.7       | 63.9          | 72.6 |      |
|                                                          | IN-Cartoon         | 92.3         | 76.1  | 59.3 | 65.3          | 52.7      | 54.9   | -          | 70.5          | 75.6 |      |
|                                                          | IN-Drawing         | 91.2         | 76.0  | 57.1 | 67.0          | 54.4      | 55.1   | 84.8       | -             | 76.8 |      |
|                                                          | IN-C               | 97.0         | 75.5  | 54.7 | 65.7          | 51.8      | 53.2   | 93.4       | 81.3          | -    |      |
| Model Soup<br>PRE-FT-EWC-LwF<br>(Wortsman et al., 2022a) | IN-V2              | 85.7         | -     | 60.8 | 66.5          | 52.2      | 55.2   | 79.4       | 66.1          | 73.4 |      |
|                                                          | IN-A               | 85.4         | 76.3  | -    | 67.6          | 52.6      | 56.0   | 79.1       | 65.3          | 72.7 |      |
|                                                          | IN-R               | 85.3         | 76.4  | 61.7 | -             | 61.1      | 55.1   | 79.4       | 69.4          | 73.3 |      |
|                                                          | IN-Sketch          | 85.0         | 76.0  | 57.2 | 75.0          | -         | 55.0   | 79.5       | 68.0          | 72.3 |      |
|                                                          | ObjNet             | 85.4         | 76.3  | 63.0 | 65.5          | 52.7      | -      | 78.4       | 63.6          | 72.7 |      |
|                                                          | IN-Cartoon         | 92.3         | 76.0  | 57.2 | 65.8          | 52.3      | 53.8   | -          | 70.7          | 75.8 |      |
|                                                          | IN-Drawing         | 91.2         | 76.4  | 56.5 | 67.3          | 54.4      | 54.5   | 84.9       | -             | 77.4 |      |
|                                                          | IN-C               | 97.2         | 76.0  | 55.7 | 65.9          | 53.0      | 53.3   | 94.0       | 82.5          | -    |      |

Table S16: The accuracy on each OOD dataset after fine-tuning ImageNet-1K pretrained ResNet-18 on the downstream datasets with various methods. Note that ImageNet-Drawing, ImageNet-Cartoon, and ImageNet-C are generated from the ImageNet validation set. Green and red indicate relative performance increases and decreases, respectively, compared to the pretrained model. Bold indicates the best performance on each evaluation dataset.

| Method                                                   | Downstream Dataset | $D_{pre}$ IN | IN-V2       | IN-A       | Realistic OOD<br>IN-R | IN-Sketch   | ObjNet      | Synthetic OOD<br>IN-Cartoon | IN-Drawing  | IN-C        |
|----------------------------------------------------------|--------------------|--------------|-------------|------------|-----------------------|-------------|-------------|-----------------------------|-------------|-------------|
| Pretrained                                               |                    | 69.8         | <b>57.3</b> | 1.1        | 33.1                  | 20.2        | 26.0        | 48.2                        | 20.4        | 31.7        |
| FT                                                       | IN-V2              | 67.1         | -           | <b>2.2</b> | 31.0                  | 17.7        | 25.1        | 42.7                        | 17.2        | 29.9        |
|                                                          | IN-A               | 50.4         | 40.6        | -          | 22.8                  | 12.1        | 19.7        | 30.0                        | 10.1        | 19.9        |
|                                                          | IN-R               | 53.1         | 42.6        | <b>3.4</b> | -                     | <b>37.1</b> | 21.3        | 43.4                        | 27.6        | 25.6        |
|                                                          | IN-Sketch          | 48.1         | 37.4        | 2.1        | 47.4                  | -           | 16.5        | 36.9                        | 22.9        | 19.2        |
|                                                          | ObjNet             | 55.2         | 44.3        | <b>3.7</b> | 25.3                  | 13.7        | -           | 32.8                        | 9.9         | 20.8        |
|                                                          | IN-Cartoon         | 75.7         | 45.2        | 2.2        | 28.8                  | 17.3        | 20.3        | -                           | 16.3        | 20.0        |
|                                                          | IN-Drawing         | 46.4         | 32.3        | 2.1        | 24.0                  | 15.2        | 10.8        | <b>23.1</b>                 | -           | 15.1        |
|                                                          | IN-C               | <b>99.2</b>  | <b>38.3</b> | <b>2.5</b> | 26.6                  | 13.4        | 14.3        | <b>85.8</b>                 | <b>65.3</b> | -           |
| Linear Probing                                           | IN-V2              | 69.0         | -           | 1.1        | 31.6                  | 18.8        | 24.6        | 45.4                        | 19.7        | 29.8        |
|                                                          | IN-A               | 66.1         | 53.5        | -          | 30.8                  | 18.7        | 23.6        | 43.5                        | 20.5        | 28.7        |
|                                                          | IN-R               | 64.3         | 51.7        | 1.2        | -                     | 23.9        | 21.6        | 48.6                        | 23.7        | 25.9        |
|                                                          | IN-Sketch          | <b>5.9</b>   | <b>4.4</b>  | 1.0        | <b>12.5</b>           | -           | <b>3.4</b>  | <b>4.7</b>                  | <b>1.9</b>  | <b>1.7</b>  |
|                                                          | ObjNet             | 64.7         | 51.8        | 1.7        | 30.0                  | 16.6        | -           | 44.5                        | 15.4        | 25.0        |
|                                                          | IN-Cartoon         | 63.7         | 48.1        | 1.3        | 30.7                  | 18.5        | 20.4        | -                           | 16.0        | 21.8        |
|                                                          | IN-Drawing         | 38.2         | 29.0        | 1.5        | 22.8                  | 13.5        | 9.7         | <b>21.2</b>                 | -           | <b>11.4</b> |
|                                                          | IN-C               | 77.2         | 48.6        | <b>2.5</b> | 28.1                  | 16.1        | 20.5        | 50.3                        | 25.2        | -           |
| Visual Prompt<br>(Bahng et al., 2022)                    | IN-V2              | 60.6         | -           | <b>2.2</b> | 30.7                  | 16.7        | 24.5        | 37.8                        | 17.1        | 21.4        |
|                                                          | IN-A               | 39.5         | 30.1        | -          | 19.6                  | 8.8         | 18.2        | 19.2                        | 5.6         | 7.3         |
|                                                          | IN-R               | 53.4         | 42.6        | <b>2.3</b> | -                     | 18.3        | 22.6        | 33.8                        | 16.3        | 16.6        |
|                                                          | IN-Sketch          | 54.6         | 42.9        | <b>2.3</b> | 32.4                  | -           | 22.6        | 34.5                        | 17.2        | 17.1        |
|                                                          | ObjNet             | 47.3         | 36.0        | 2.9        | 23.6                  | 11.6        | -           | 25.6                        | 9.1         | 12.9        |
|                                                          | IN-Cartoon         | 58.2         | 45.4        | 2.2        | 29.8                  | 15.7        | 22.8        | -                           | 13.6        | 17.8        |
|                                                          | IN-Drawing         | 54.0         | 43.0        | 1.9        | 29.7                  | 17.1        | 20.6        | 33.1                        | -           | 17.3        |
|                                                          | IN-C               | 61.8         | 50.5        | <b>2.2</b> | 31.1                  | 18.2        | 25.4        | 38.7                        | 20.5        | -           |
| EWC<br>(Kirkpatrick et al., 2017)                        | IN-V2              | 69.7         | -           | 1.1        | 32.2                  | 19.2        | 25.7        | 45.8                        | 20.7        | 31.5        |
|                                                          | IN-A               | 56.0         | 45.5        | -          | 23.5                  | <b>8.5</b>  | 22.1        | 35.4                        | 12.6        | 22.0        |
|                                                          | IN-R               | 64.5         | 52.2        | 1.7        | -                     | <b>31.3</b> | 24.2        | 53.0                        | 28.0        | 29.0        |
|                                                          | IN-Sketch          | <b>39.5</b>  | <b>29.5</b> | 2.0        | 28.2                  | -           | <b>13.3</b> | 31.5                        | 17.9        | <b>13.3</b> |
|                                                          | ObjNet             | 63.9         | 51.6        | <b>2.7</b> | 29.5                  | 15.5        | -           | 42.4                        | 15.0        | 24.9        |
|                                                          | IN-Cartoon         | 62.0         | 47.6        | 1.3        | 31.9                  | 19.5        | 20.2        | -                           | 16.3        | 20.7        |
|                                                          | IN-Drawing         | <b>36.7</b>  | <b>29.2</b> | 1.5        | 24.5                  | 15.4        | <b>9.9</b>  | <b>19.2</b>                 | -           | <b>12.0</b> |
|                                                          | IN-C               | 66.2         | 54.4        | <b>2.3</b> | 31.2                  | 18.5        | <b>26.8</b> | 40.4                        | 22.0        | -           |
| LwF<br>(Li & Hoiem, 2017)                                | IN-V2              | 68.7         | -           | <b>1.9</b> | 32.3                  | 19.1        | 25.8        | 45.4                        | 18.8        | 31.0        |
|                                                          | IN-A               | 61.4         | 50.3        | -          | 28.0                  | 16.0        | 23.0        | 38.9                        | 15.7        | 26.7        |
|                                                          | IN-R               | 62.3         | 50.6        | <b>2.6</b> | -                     | <b>36.2</b> | 23.8        | 50.0                        | <b>29.6</b> | 30.3        |
|                                                          | IN-Sketch          | 54.7         | 43.1        | 1.7        | <b>47.8</b>           | -           | 19.1        | 42.0                        | 23.6        | 21.8        |
|                                                          | ObjNet             | 61.9         | 50.0        | <b>3.3</b> | 29.8                  | 16.9        | -           | 39.3                        | 14.1        | 25.6        |
|                                                          | IN-Cartoon         | 81.6         | 52.5        | 1.8        | 32.2                  | 19.5        | 23.7        | -                           | 21.5        | 29.0        |
|                                                          | IN-Drawing         | 60.3         | 41.0        | 2.0        | 27.0                  | 16.8        | 15.5        | 31.3                        | -           | 20.8        |
|                                                          | IN-C               | <b>97.2</b>  | 47.2        | 1.6        | 31.0                  | 18.1        | 18.4        | <b>83.2</b>                 | <b>53.4</b> | -           |
| LP-FT<br>(Kumar et al., 2022)                            | IN-V2              | 67.0         | -           | <b>2.3</b> | 31.0                  | 17.7        | 25.1        | 42.8                        | 17.0        | 29.8        |
|                                                          | IN-A               | 54.4         | 44.2        | -          | 23.4                  | 12.6        | 20.8        | 30.9                        | 12.2        | 22.6        |
|                                                          | IN-R               | 56.2         | 45.5        | <b>3.3</b> | -                     | <b>37.9</b> | 21.9        | 46.2                        | <b>29.5</b> | 27.5        |
|                                                          | IN-Sketch          | <b>45.8</b>  | <b>36.1</b> | 2.2        | 45.2                  | -           | 15.5        | 35.9                        | 21.6        | 17.5        |
|                                                          | ObjNet             | 58.1         | 46.8        | <b>3.6</b> | 27.0                  | 14.8        | -           | 36.4                        | 11.5        | 22.2        |
|                                                          | IN-Cartoon         | 76.3         | 45.2        | 2.2        | 28.8                  | 17.2        | 20.2        | -                           | 16.6        | 19.7        |
|                                                          | IN-Drawing         | 46.4         | 31.5        | 2.1        | 24.0                  | 14.8        | 10.8        | <b>22.6</b>                 | -           | <b>14.5</b> |
|                                                          | IN-C               | <b>99.4</b>  | 37.4        | <b>2.5</b> | 26.6                  | 13.0        | 13.5        | <b>88.3</b>                 | <b>67.6</b> | -           |
| WiSE-FT<br>(Wortsman et al., 2022b)                      | IN-V2              | 69.6         | -           | 1.6        | 32.9                  | 19.9        | 26.3        | 47.0                        | 19.8        | 32.3        |
|                                                          | IN-A               | 66.5         | 54.7        | -          | 31.5                  | 18.9        | 26.5        | 45.5                        | 18.4        | 30.7        |
|                                                          | IN-R               | 66.2         | 54.2        | <b>1.9</b> | -                     | <b>33.9</b> | 25.7        | 54.0                        | <b>31.6</b> | <b>33.6</b> |
|                                                          | IN-Sketch          | 64.9         | 52.3        | 1.5        | 46.6                  | -           | 24.1        | 50.3                        | 30.2        | 29.8        |
|                                                          | ObjNet             | 67.2         | 54.9        | <b>2.3</b> | 32.6                  | 19.3        | -           | 44.9                        | 17.6        | 30.4        |
|                                                          | IN-Cartoon         | 76.5         | 54.4        | 1.5        | 33.5                  | 20.5        | 25.0        | -                           | 21.2        | 28.8        |
|                                                          | IN-Drawing         | 68.6         | 51.4        | 1.6        | 32.8                  | 20.8        | 21.1        | 41.9                        | -           | 28.8        |
|                                                          | IN-C               | <b>86.0</b>  | 52.9        | <b>1.9</b> | 35.4                  | 20.9        | 24.2        | <b>68.0</b>                 | <b>40.0</b> | -           |
| Model Soup<br>PRE-FT-EWC-LwF<br>(Wortsman et al., 2022a) | IN-V2              | 69.6         | -           | 1.6        | 32.8                  | 19.7        | 26.2        | 46.7                        | 20.1        | 32.2        |
|                                                          | IN-A               | 65.1         | 53.5        | -          | 30.7                  | 17.6        | 25.8        | 44.3                        | 16.7        | 29.2        |
|                                                          | IN-R               | 65.9         | 54.0        | <b>2.1</b> | -                     | <b>34.7</b> | 25.4        | 53.8                        | <b>31.6</b> | 32.9        |
|                                                          | IN-Sketch          | 63.2         | 50.9        | 1.5        | 47.4                  | -           | 23.0        | 49.7                        | 30.6        | 28.2        |
|                                                          | ObjNet             | 66.3         | 54.2        | <b>2.6</b> | 32.3                  | 18.6        | -           | 44.4                        | 17.0        | 29.3        |
|                                                          | IN-Cartoon         | 74.8         | 53.1        | 1.5        | 33.6                  | 20.6        | 24.3        | -                           | 20.9        | 27.5        |
|                                                          | IN-Drawing         | 62.6         | 46.8        | 1.7        | 31.1                  | 19.8        | 18.0        | <b>35.7</b>                 | -           | <b>24.2</b> |
|                                                          | IN-C               | <b>84.3</b>  | 53.9        | 1.7        | 35.5                  | 21.2        | 25.0        | <b>64.9</b>                 | <b>38.5</b> | -           |

Table S17: The accuracy on each OOD dataset after fine-tuning ImageNet-1K pretrained ResNet-50 on the downstream datasets with various methods. Note that ImageNet-Drawing, ImageNet-Cartoon, and ImageNet-C are generated from the ImageNet validation set. Green and red indicate relative performance increases and decreases, respectively, compared to the pretrained model. Bold indicates the best performance on each evaluation dataset.

| Method                                                   | Downstream Dataset | $D_{pre}$ IN | IN-V2       | IN-A        | Realistic OOD<br>IN-R | IN-Sketch   | ObjNet      | IN-Cartoon  | Synthetic OOD<br>IN-Drawing | IN-C        |
|----------------------------------------------------------|--------------------|--------------|-------------|-------------|-----------------------|-------------|-------------|-------------|-----------------------------|-------------|
| Pretrained                                               |                    | 80.3         | <b>69.5</b> | 16.7        | 41.6                  | 28.4        | 42.7        | 61.1        | 31.1                        | 46.6        |
| FT                                                       | IN-V2              | 79.6         | -           | 18.2        | 42.4                  | 28.7        | 41.8        | 58.1        | 31.0                        | 47.0        |
|                                                          | IN-A               | 75.7         | 65.2        | -           | 40.6                  | 28.0        | 42.6        | 52.4        | 25.8                        | 46.3        |
|                                                          | IN-R               | 72.5         | 61.7        | 16.5        | -                     | <b>49.1</b> | 37.2        | 61.7        | <b>46.0</b>                 | 43.7        |
|                                                          | IN-Sketch          | 57.3         | <b>45.7</b> | <b>5.5</b>  | <b>55.0</b>           | -           | <b>25.6</b> | 48.9        | 30.3                        | <b>23.3</b> |
|                                                          | ObjNet             | 75.3         | 63.5        | <b>22.0</b> | 38.5                  | 23.3        | -           | 53.0        | 22.7                        | 41.8        |
|                                                          | IN-Cartoon         | 81.4         | 58.8        | 12.9        | 39.6                  | 28.0        | 34.6        | -           | 25.1                        | 31.9        |
|                                                          | IN-Drawing         | 42.9         | 32.6        | <b>4.9</b>  | 30.3                  | 24.2        | <b>11.9</b> | <b>30.0</b> | -                           | <b>16.3</b> |
|                                                          | IN-C               | <b>99.7</b>  | 56.5        | <b>6.6</b>  | 38.2                  | 23.1        | 28.3        | <b>89.3</b> | <b>66.0</b>                 | -           |
| Linear Probing                                           | IN-V2              | 79.6         | -           | 12.4        | 41.0                  | 27.5        | 40.1        | 56.5        | 34.4                        | 45.6        |
|                                                          | IN-A               | 78.2         | 66.8        | -           | 40.8                  | 28.0        | 41.1        | 55.0        | 35.2                        | 45.4        |
|                                                          | IN-R               | 76.2         | 64.5        | 16.7        | -                     | 31.5        | 39.2        | 60.0        | 35.2                        | 40.6        |
|                                                          | IN-Sketch          | <b>10.5</b>  | <b>8.3</b>  | <b>1.7</b>  | <b>15.9</b>           | -           | <b>7.1</b>  | <b>9.5</b>  | <b>4.9</b>                  | <b>2.8</b>  |
|                                                          | ObjNet             | 76.1         | 63.9        | 17.0        | 39.4                  | 25.3        | -           | 55.2        | 25.7                        | 39.4        |
|                                                          | IN-Cartoon         | 73.7         | 60.3        | 11.5        | 39.9                  | 26.0        | 32.4        | -           | 31.6                        | 35.6        |
|                                                          | IN-Drawing         | <b>10.4</b>  | <b>7.9</b>  | <b>1.8</b>  | <b>15.5</b>           | <b>17.7</b> | <b>2.9</b>  | <b>5.3</b>  | -                           | <b>8.8</b>  |
|                                                          | IN-C               | 82.5         | 62.5        | 16.3        | 35.3                  | 23.6        | 38.1        | 56.1        | 31.6                        | -           |
| Visual Prompt<br>(Bahng et al., 2022)                    | IN-V2              | 75.4         | -           | 11.9        | 37.5                  | 24.2        | 39.9        | 51.8        | 24.9                        | 36.4        |
|                                                          | IN-A               | 73.1         | 61.3        | -           | 37.0                  | 23.4        | 41.3        | 48.8        | 21.9                        | 32.8        |
|                                                          | IN-R               | 73.2         | 61.1        | 13.1        | -                     | 28.9        | 38.5        | 51.5        | 28.0                        | 32.8        |
|                                                          | IN-Sketch          | 73.8         | 61.5        | 12.3        | 43.4                  | -           | 39.0        | 50.9        | 28.1                        | 33.0        |
|                                                          | ObjNet             | 72.7         | 60.5        | 13.5        | 34.6                  | 22.9        | -           | 47.2        | 19.9                        | 33.1        |
|                                                          | IN-Cartoon         | 74.5         | 62.3        | 11.3        | 38.1                  | 24.3        | 38.1        | -           | 24.7                        | 34.5        |
|                                                          | IN-Drawing         | 74.2         | 62.3        | 11.3        | 39.6                  | 26.4        | 37.9        | 52.3        | -                           | 35.1        |
|                                                          | IN-C               | 75.0         | 63.4        | 11.9        | 37.0                  | 23.7        | 39.8        | 51.8        | 28.1                        | -           |
| EWC<br>(Kirkpatrick et al., 2017)                        | IN-V2              | 80.2         | -           | 13.6        | 41.5                  | 28.3        | 41.3        | 58.0        | 31.6                        | 46.0        |
|                                                          | IN-A               | 78.3         | 67.5        | -           | 42.9                  | 28.8        | 43.1        | 56.7        | 31.9                        | 46.8        |
|                                                          | IN-R               | 77.0         | 65.4        | 17.4        | -                     | <b>40.3</b> | 40.2        | 64.8        | <b>40.3</b>                 | 42.9        |
|                                                          | IN-Sketch          | <b>40.9</b>  | <b>32.1</b> | <b>4.0</b>  | 32.7                  | -           | <b>17.8</b> | 36.0        | 21.4                        | <b>13.2</b> |
|                                                          | ObjNet             | 77.1         | 65.5        | 18.7        | 40.7                  | 25.7        | -           | 56.8        | 24.0                        | 41.3        |
|                                                          | IN-Cartoon         | 72.1         | 58.8        | 11.4        | 39.1                  | 25.5        | 33.2        | -           | 25.4                        | 33.1        |
|                                                          | IN-Drawing         | <b>8.1</b>   | <b>6.8</b>  | <b>1.5</b>  | <b>14.4</b>           | <b>17.2</b> | <b>2.8</b>  | <b>3.1</b>  | -                           | <b>7.5</b>  |
|                                                          | IN-C               | 76.1         | 64.9        | 18.0        | 38.0                  | 25.3        | 40.6        | 51.1        | 30.2                        | -           |
| LwF<br>(Li & Hoiem, 2017)                                | IN-V2              | 79.7         | -           | 19.4        | 43.1                  | 29.0        | 42.3        | 58.7        | 31.8                        | 47.5        |
|                                                          | IN-A               | 76.4         | 65.8        | -           | 41.3                  | 28.6        | 42.8        | 53.5        | 26.6                        | 46.8        |
|                                                          | IN-R               | 73.7         | 63.0        | 17.0        | -                     | <b>49.3</b> | 38.0        | 62.8        | <b>46.6</b>                 | 44.9        |
|                                                          | IN-Sketch          | <b>54.3</b>  | <b>43.1</b> | <b>5.5</b>  | <b>51.8</b>           | -           | <b>24.5</b> | 47.5        | 29.7                        | <b>21.4</b> |
|                                                          | ObjNet             | 76.7         | 65.3        | 21.9        | 39.7                  | 24.6        | -           | 55.3        | 24.1                        | 43.1        |
|                                                          | IN-Cartoon         | 82.4         | 60.4        | 14.5        | 41.0                  | 29.1        | 35.8        | -           | 26.9                        | 34.6        |
|                                                          | IN-Drawing         | <b>17.5</b>  | <b>13.8</b> | <b>2.7</b>  | <b>21.2</b>           | <b>22.4</b> | <b>5.7</b>  | <b>8.2</b>  | -                           | <b>12.3</b> |
|                                                          | IN-C               | <b>99.7</b>  | 58.4        | <b>5.9</b>  | 38.9                  | 23.5        | 29.7        | <b>90.9</b> | <b>66.5</b>                 | -           |
| LP-FT<br>(Kumar et al., 2022)                            | IN-V2              | 79.6         | -           | 17.7        | 42.3                  | 28.5        | 41.4        | 58.3        | 31.6                        | 47.1        |
|                                                          | IN-A               | 76.3         | 65.8        | -           | 40.2                  | 28.1        | 43.0        | 52.6        | 26.8                        | 46.4        |
|                                                          | IN-R               | 73.4         | 62.3        | 16.3        | -                     | <b>48.9</b> | 37.9        | 62.5        | <b>46.6</b>                 | 44.2        |
|                                                          | IN-Sketch          | <b>57.6</b>  | <b>46.0</b> | <b>5.1</b>  | <b>55.5</b>           | -           | <b>25.9</b> | 49.1        | 31.6                        | <b>24.2</b> |
|                                                          | ObjNet             | 75.5         | 63.6        | 21.5        | 39.1                  | 23.7        | -           | 54.0        | 22.9                        | 41.8        |
|                                                          | IN-Cartoon         | 81.7         | 59.0        | 12.8        | 39.6                  | 28.1        | 34.5        | -           | 25.8                        | 32.2        |
|                                                          | IN-Drawing         | <b>46.4</b>  | <b>35.2</b> | <b>5.1</b>  | 29.9                  | 22.9        | <b>13.4</b> | <b>28.4</b> | -                           | <b>16.7</b> |
|                                                          | IN-C               | <b>99.6</b>  | 56.9        | <b>6.3</b>  | 37.8                  | 22.9        | 28.4        | <b>88.7</b> | <b>63.7</b>                 | -           |
| WiSE-FT<br>(Wortsman et al., 2022b)                      | IN-V2              | 80.7         | -           | 17.3        | 42.5                  | 29.2        | 42.6        | 60.9        | 32.3                        | 48.1        |
|                                                          | IN-A               | 80.1         | 69.5        | -           | 43.0                  | 30.1        | <b>44.5</b> | 60.1        | 31.6                        | 48.9        |
|                                                          | IN-R               | 79.2         | 68.5        | 18.6        | -                     | <b>45.2</b> | 42.5        | 67.7        | <b>47.1</b>                 | <b>49.3</b> |
|                                                          | IN-Sketch          | 76.6         | 65.3        | <b>9.9</b>  | <b>56.7</b>           | -           | 38.3        | 63.4        | <b>42.6</b>                 | 41.5        |
|                                                          | ObjNet             | 79.7         | 68.4        | <b>20.5</b> | 42.0                  | 27.4        | -           | 60.1        | 29.5                        | 46.8        |
|                                                          | IN-Cartoon         | 83.8         | 67.5        | 16.4        | 43.3                  | 29.7        | 40.9        | -           | 31.8                        | 42.8        |
|                                                          | IN-Drawing         | 78.8         | 64.6        | 12.4        | 42.6                  | 30.5        | 35.0        | 58.6        | -                           | 41.8        |
|                                                          | IN-C               | 91.4         | 67.4        | 11.3        | 44.2                  | 29.4        | 39.0        | 79.1        | <b>50.8</b>                 | -           |
| Model Soup<br>PRE-FT-EWC-LwF<br>(Wortsman et al., 2022a) | IN-V2              | 80.6         | -           | 16.8        | 42.7                  | 29.4        | 42.3        | 60.1        | 32.2                        | 48.0        |
|                                                          | IN-A               | 79.5         | 68.6        | -           | 43.1                  | 30.0        | 44.2        | 58.8        | 31.2                        | 48.9        |
|                                                          | IN-R               | 78.4         | 67.7        | 18.9        | -                     | <b>47.2</b> | 41.8        | 67.3        | <b>47.6</b>                 | 48.4        |
|                                                          | IN-Sketch          | 74.0         | <b>62.7</b> | <b>8.9</b>  | <b>58.4</b>           | -           | 36.0        | 60.9        | <b>45.0</b>                 | 38.7        |
|                                                          | ObjNet             | 79.1         | 67.7        | 21.1        | 41.8                  | 27.1        | -           | 59.3        | 27.9                        | 45.7        |
|                                                          | IN-Cartoon         | 82.1         | 65.2        | 15.0        | 42.9                  | 29.5        | 39.6        | -           | 30.0                        | 39.5        |
|                                                          | IN-Drawing         | <b>62.2</b>  | <b>49.5</b> | <b>8.9</b>  | 36.8                  | 28.6        | <b>20.5</b> | <b>41.7</b> | -                           | <b>28.9</b> |
|                                                          | IN-C               | 91.2         | 67.3        | 12.1        | 44.3                  | 29.6        | 39.5        | 78.4        | <b>52.1</b>                 | -           |

Table S18: Accuracy of ImageNet-1K with AugReg pretrained ViT-B/16 with different fine-tuning methods and downstream datasets on each ImageNet-C corruption. For each corruption, accuracy is averaged across 5 levels of severity.

| Method                                             | Fine-Tuning Dataset | Avg. | Gauss. | Noise Shot | Impulse | Defocus | Glass | Blur Motion | Zoom | Snow | Frost | Weather Fog | Bright | Contrast | Digital Elastic | Pixel | JPEG |
|----------------------------------------------------|---------------------|------|--------|------------|---------|---------|-------|-------------|------|------|-------|-------------|--------|----------|-----------------|-------|------|
| Pretrained                                         |                     | 56.0 | 57     | 54         | 54      | 49      | 42    | 53          | 46   | 48   | 55    | 61          | 74     | 56       | 59              | 67    | 66   |
| FT                                                 | IN-V2               | 57.4 | 56     | 54         | 53      | 51      | 40    | 55          | 46   | 53   | 59    | 65          | 74     | 59       | 58              | 68    | 67   |
|                                                    | IN-A                | 53.5 | 53     | 51         | 50      | 50      | 38    | 52          | 39   | 50   | 56    | 57          | 70     | 56       | 51              | 65    | 64   |
|                                                    | IN-R                | 52.0 | 52     | 50         | 49      | 46      | 44    | 49          | 37   | 49   | 55    | 57          | 66     | 53       | 51              | 62    | 61   |
|                                                    | IN-Sketch           | 53.8 | 55     | 53         | 52      | 46      | 39    | 49          | 43   | 51   | 56    | 58          | 70     | 55       | 55              | 63    | 62   |
|                                                    | ObjNet              | 52.3 | 52     | 48         | 48      | 46      | 37    | 51          | 38   | 50   | 55    | 58          | 70     | 51       | 52              | 64    | 63   |
|                                                    | IN-Cartoon          | 51.3 | 53     | 50         | 50      | 44      | 35    | 48          | 35   | 48   | 50    | 54          | 74     | 53       | 53              | 65    | 58   |
|                                                    | IN-Drawing          | 56.0 | 58     | 56         | 55      | 46      | 43    | 52          | 40   | 55   | 62    | 61          | 74     | 53       | 57              | 66    | 62   |
| Linear Probing                                     | IN-V2               | 55.9 | 56     | 54         | 54      | 49      | 42    | 53          | 46   | 48   | 55    | 61          | 73     | 56       | 59              | 66    | 65   |
|                                                    | IN-A                | 55.8 | 56     | 53         | 53      | 49      | 42    | 54          | 46   | 48   | 55    | 61          | 73     | 57       | 59              | 66    | 65   |
|                                                    | IN-R                | 56.2 | 56     | 54         | 54      | 49      | 44    | 54          | 47   | 49   | 55    | 61          | 73     | 56       | 60              | 66    | 66   |
|                                                    | IN-Sketch           | 54.5 | 54     | 52         | 52      | 48      | 41    | 51          | 45   | 48   | 54    | 59          | 72     | 55       | 58              | 65    | 64   |
|                                                    | ObjNet              | 56.1 | 56     | 54         | 54      | 49      | 43    | 54          | 48   | 48   | 56    | 62          | 73     | 53       | 60              | 66    | 65   |
|                                                    | IN-Cartoon          | 55.6 | 56     | 54         | 53      | 48      | 42    | 52          | 46   | 48   | 55    | 59          | 75     | 54       | 59              | 67    | 67   |
|                                                    | IN-Drawing          | 54.3 | 57     | 55         | 55      | 43      | 43    | 50          | 44   | 51   | 61    | 49          | 74     | 39       | 59              | 66    | 67   |
| Visual Prompt (Bahng et al., 2022)                 | IN-V2               | 47.9 | 44     | 42         | 41      | 41      | 35    | 46          | 42   | 42   | 46    | 51          | 69     | 48       | 55              | 59    | 57   |
|                                                    | IN-A                | 38.0 | 33     | 31         | 29      | 31      | 24    | 36          | 31   | 35   | 38    | 43          | 60     | 37       | 46              | 48    | 49   |
|                                                    | IN-R                | 40.1 | 39     | 38         | 36      | 33      | 28    | 36          | 30   | 36   | 41    | 41          | 61     | 38       | 45              | 50    | 50   |
|                                                    | IN-Sketch           | 44.3 | 43     | 41         | 40      | 37      | 29    | 40          | 36   | 39   | 45    | 46          | 65     | 47       | 49              | 54    | 55   |
|                                                    | ObjNet              | 35.3 | 28     | 26         | 24      | 28      | 22    | 33          | 29   | 32   | 35    | 41          | 61     | 37       | 44              | 45    | 44   |
|                                                    | IN-Cartoon          | 41.8 | 39     | 37         | 36      | 34      | 27    | 38          | 33   | 36   | 38    | 42          | 66     | 43       | 50              | 55    | 53   |
|                                                    | IN-Drawing          | 44.2 | 45     | 43         | 43      | 33      | 32    | 38          | 32   | 41   | 51    | 42          | 65     | 39       | 59              | 56    | 52   |
| LoRA (Hu et al., 2021)                             | IN-V2               | 56.1 | 57     | 54         | 54      | 49      | 43    | 53          | 46   | 48   | 55    | 61          | 74     | 57       | 59              | 67    | 66   |
|                                                    | IN-A                | 56.5 | 57     | 54         | 54      | 49      | 44    | 55          | 48   | 49   | 57    | 61          | 74     | 52       | 60              | 67    | 66   |
|                                                    | IN-R                | 56.7 | 57     | 54         | 54      | 50      | 44    | 54          | 48   | 49   | 56    | 62          | 74     | 56       | 60              | 67    | 66   |
|                                                    | IN-Sketch           | 56.6 | 56     | 54         | 54      | 51      | 43    | 53          | 47   | 50   | 56    | 62          | 74     | 57       | 59              | 67    | 66   |
|                                                    | ObjNet              | 55.0 | 57     | 54         | 54      | 48      | 43    | 54          | 47   | 48   | 55    | 55          | 74     | 44       | 60              | 67    | 66   |
|                                                    | IN-Cartoon          | 54.6 | 56     | 53         | 53      | 48      | 43    | 50          | 45   | 48   | 54    | 56          | 73     | 50       | 58              | 66    | 65   |
|                                                    | IN-Drawing          | 55.1 | 58     | 56         | 56      | 44      | 45    | 51          | 43   | 51   | 63    | 54          | 74     | 43       | 59              | 66    | 66   |
| EWC (Kirkpatrick et al., 2017)                     | IN-V2               | 58.2 | 58     | 55         | 55      | 52      | 44    | 56          | 49   | 52   | 58    | 64          | 75     | 59       | 61              | 68    | 67   |
|                                                    | IN-A                | 56.6 | 55     | 53         | 52      | 52      | 42    | 56          | 46   | 52   | 58    | 62          | 73     | 59       | 57              | 67    | 66   |
|                                                    | IN-R                | 56.1 | 55     | 54         | 53      | 50      | 44    | 53          | 43   | 53   | 59    | 62          | 72     | 58       | 56              | 64    | 65   |
|                                                    | IN-Sketch           | 57.2 | 57     | 56         | 55      | 50      | 44    | 54          | 47   | 52   | 57    | 61          | 74     | 57       | 59              | 67    | 67   |
|                                                    | ObjNet              | 56.9 | 56     | 53         | 53      | 51      | 43    | 56          | 47   | 52   | 58    | 62          | 74     | 58       | 59              | 67    | 66   |
|                                                    | IN-Cartoon          | 54.7 | 55     | 52         | 52      | 48      | 40    | 52          | 43   | 48   | 54    | 60          | 73     | 56       | 58              | 66    | 64   |
|                                                    | IN-Drawing          | 58.3 | 59     | 57         | 57      | 50      | 44    | 55          | 45   | 54   | 63    | 65          | 74     | 59       | 60              | 68    | 66   |
| LwF (Li & Hoiem, 2017)                             | IN-V2               | 57.9 | 57     | 55         | 54      | 51      | 42    | 55          | 47   | 53   | 59    | 65          | 75     | 60       | 59              | 69    | 68   |
|                                                    | IN-A                | 57.2 | 56     | 54         | 54      | 52      | 42    | 55          | 45   | 53   | 60    | 62          | 73     | 59       | 57              | 68    | 66   |
|                                                    | IN-R                | 57.2 | 57     | 56         | 55      | 50      | 48    | 54          | 43   | 54   | 59    | 62          | 72     | 57       | 57              | 67    | 66   |
|                                                    | IN-Sketch           | 55.2 | 56     | 54         | 53      | 48      | 40    | 51          | 45   | 52   | 57    | 60          | 72     | 56       | 57              | 65    | 64   |
|                                                    | ObjNet              | 56.3 | 56     | 53         | 53      | 51      | 41    | 55          | 44   | 52   | 57    | 63          | 73     | 57       | 57              | 67    | 66   |
|                                                    | IN-Cartoon          | 55.6 | 56     | 53         | 53      | 49      | 40    | 52          | 41   | 51   | 55    | 59          | 77     | 57       | 58              | 68    | 65   |
|                                                    | IN-Drawing          | 58.2 | 59     | 56         | 56      | 50      | 45    | 55          | 43   | 55   | 63    | 64          | 77     | 56       | 59              | 69    | 65   |
| LP-FT (Kumar et al., 2022)                         | IN-V2               | 57.6 | 57     | 54         | 54      | 51      | 41    | 55          | 46   | 53   | 59    | 65          | 74     | 60       | 59              | 68    | 67   |
|                                                    | IN-A                | 56.2 | 55     | 52         | 52      | 51      | 41    | 55          | 43   | 53   | 59    | 62          | 73     | 59       | 56              | 67    | 65   |
|                                                    | IN-R                | 55.3 | 55     | 54         | 52      | 48      | 47    | 52          | 41   | 52   | 58    | 60          | 70     | 56       | 56              | 65    | 64   |
|                                                    | IN-Sketch           | 54.4 | 54     | 53         | 52      | 48      | 40    | 50          | 44   | 51   | 55    | 59          | 70     | 56       | 56              | 64    | 63   |
|                                                    | ObjNet              | 54.9 | 54     | 51         | 51      | 48      | 40    | 54          | 43   | 51   | 57    | 61          | 72     | 54       | 56              | 66    | 64   |
|                                                    | IN-Cartoon          | 52.8 | 53     | 50         | 50      | 46      | 37    | 49          | 38   | 49   | 52    | 55          | 75     | 54       | 55              | 66    | 61   |
|                                                    | IN-Drawing          | 56.0 | 59     | 56         | 56      | 44      | 44    | 52          | 40   | 56   | 63    | 57          | 76     | 49       | 58              | 67    | 64   |
| WiSE-FT (Wortsman et al., 2022b)                   | IN-V2               | 58.0 | 58     | 55         | 55      | 51      | 42    | 55          | 47   | 52   | 58    | 65          | 75     | 60       | 60              | 69    | 68   |
|                                                    | IN-A                | 57.8 | 57     | 55         | 55      | 52      | 43    | 56          | 46   | 53   | 59    | 64          | 74     | 60       | 59              | 68    | 66   |
|                                                    | IN-R                | 59.6 | 59     | 58         | 57      | 53      | 49    | 57          | 48   | 55   | 61    | 65          | 75     | 60       | 61              | 69    | 68   |
|                                                    | IN-Sketch           | 57.3 | 58     | 56         | 56      | 50      | 42    | 53          | 47   | 53   | 59    | 63          | 74     | 59       | 59              | 67    | 66   |
|                                                    | ObjNet              | 57.6 | 57     | 54         | 54      | 51      | 43    | 56          | 46   | 53   | 58    | 64          | 74     | 59       | 59              | 68    | 67   |
|                                                    | IN-Cartoon          | 56.3 | 57     | 54         | 55      | 50      | 41    | 53          | 43   | 51   | 55    | 61          | 76     | 58       | 59              | 68    | 65   |
|                                                    | IN-Drawing          | 59.5 | 61     | 59         | 59      | 51      | 45    | 56          | 46   | 55   | 63    | 65          | 77     | 59       | 61              | 69    | 67   |
| Model Soup PRE-FT-EWC-LwF (Wortsman et al., 2022a) | IN-V2               | 58.0 | 58     | 55         | 55      | 51      | 43    | 55          | 47   | 52   | 59    | 64          | 75     | 60       | 60              | 69    | 68   |
|                                                    | IN-A                | 57.8 | 57     | 55         | 54      | 52      | 43    | 56          | 46   | 53   | 59    | 64          | 74     | 60       | 58              | 68    | 67   |
|                                                    | IN-R                | 59.6 | 59     | 58         | 57      | 53      | 49    | 57          | 47   | 55   | 61    | 65          | 74     | 60       | 61              | 69    | 68   |
|                                                    | IN-Sketch           | 57.5 | 58     | 56         | 56      | 50      | 42    | 53          | 47   | 53   | 59    | 63          | 74     | 59       | 59              | 67    | 66   |
|                                                    | ObjNet              | 57.7 | 57     | 54         | 54      | 52      | 43    | 56          | 47   | 53   | 58    | 64          | 74     | 59       | 59              | 68    | 67   |
|                                                    | IN-Cartoon          | 56.2 | 57     | 54         | 54      | 50      | 41    | 53          | 43   | 51   | 55    | 61          | 76     | 58       | 59              | 68    | 65   |
|                                                    | IN-Drawing          | 59.7 | 61     | 59         | 59      | 51      | 45    | 56          | 46   | 55   | 63    | 66          | 77     | 59       | 61              | 69    | 67   |

Table S19: Accuracy of ImageNet-1K with SAM pretrained ViT-B/16 with different fine-tuning methods and downstream datasets on each ImageNet-C corruption. For each corruption, accuracy is averaged across 5 levels of severity.

| Dataset                                                  | Method     | Avg. | Noise  |      |         | Blur    |       |        |      | Weather |       |     |        | Digital  |         |       |      |
|----------------------------------------------------------|------------|------|--------|------|---------|---------|-------|--------|------|---------|-------|-----|--------|----------|---------|-------|------|
|                                                          |            |      | Gauss. | Shot | Impulse | Defocus | Glass | Motion | Zoom | Snow    | Frost | Fog | Bright | Contrast | Elastic | Pixel | JPEG |
| Pretrained                                               |            | 54.6 | 53     | 50   | 51      | 50      | 48    | 55     | 47   | 47      | 51    | 51  | 73     | 46       | 64      | 68    | 67   |
| FT                                                       | IN-V2      | 56.8 | 51     | 49   | 48      | 54      | 49    | 59     | 50   | 51      | 53    | 59  | 75     | 52       | 65      | 69    | 68   |
|                                                          | IN-A       | 51.3 | 42     | 39   | 36      | 56      | 45    | 56     | 43   | 46      | 46    | 56  | 71     | 52       | 58      | 61    | 61   |
|                                                          | IN-R       | 53.9 | 49     | 48   | 47      | 53      | 51    | 54     | 42   | 50      | 54    | 55  | 70     | 52       | 58      | 62    | 64   |
|                                                          | IN-Sketch  | 55.7 | 53     | 52   | 51      | 52      | 46    | 55     | 49   | 50      | 52    | 59  | 72     | 52       | 60      | 66    | 66   |
|                                                          | ObjNet     | 52.2 | 43     | 41   | 38      | 56      | 46    | 55     | 47   | 47      | 48    | 54  | 71     | 49       | 60      | 64    | 64   |
|                                                          | IN-Cartoon | 51.3 | 44     | 42   | 39      | 50      | 40    | 53     | 42   | 46      | 45    | 54  | 74     | 52       | 59      | 66    | 65   |
| IN-Drawing                                               | 55.4       | 54   | 53     | 52   | 47      | 48      | 54    | 43     | 51   | 59      | 55    | 74  | 47     | 61       | 67      | 66    |      |
| Linear Probing                                           | IN-V2      | 54.7 | 52     | 50   | 50      | 50      | 49    | 55     | 47   | 47      | 51    | 52  | 73     | 47       | 64      | 68    | 67   |
|                                                          | IN-A       | 54.5 | 52     | 50   | 49      | 49      | 48    | 55     | 47   | 47      | 51    | 51  | 73     | 47       | 64      | 68    | 67   |
|                                                          | IN-R       | 54.6 | 52     | 50   | 49      | 49      | 49    | 54     | 47   | 47      | 51    | 51  | 73     | 46       | 64      | 68    | 67   |
|                                                          | IN-Sketch  | 54.1 | 52     | 50   | 50      | 49      | 48    | 53     | 47   | 48      | 51    | 50  | 72     | 46       | 63      | 67    | 66   |
|                                                          | ObjNet     | 54.6 | 52     | 50   | 50      | 50      | 48    | 54     | 47   | 47      | 51    | 52  | 73     | 47       | 64      | 68    | 67   |
|                                                          | IN-Cartoon | 53.8 | 52     | 50   | 49      | 49      | 48    | 54     | 46   | 46      | 50    | 46  | 73     | 43       | 64      | 69    | 67   |
| IN-Drawing                                               | 54.6       | 53   | 51     | 51   | 48      | 49      | 53    | 46     | 48   | 53      | 50    | 73  | 46     | 64       | 68      | 67    |      |
| Visual Prompt<br>(Bahng et al., 2022)                    | IN-V2      | 44.7 | 42     | 41   | 40      | 39      | 37    | 42     | 39   | 36      | 40    | 38  | 66     | 34       | 57      | 58    | 61   |
|                                                          | IN-A       | 30.4 | 26     | 25   | 22      | 22      | 24    | 27     | 25   | 26      | 29    | 26  | 53     | 22       | 43      | 41    | 44   |
|                                                          | IN-R       | 36.8 | 38     | 37   | 36      | 27      | 28    | 31     | 28   | 31      | 35    | 26  | 60     | 22       | 48      | 51    | 56   |
|                                                          | IN-Sketch  | 36.3 | 36     | 35   | 34      | 27      | 27    | 30     | 27   | 33      | 36    | 24  | 61     | 21       | 48      | 49    | 57   |
|                                                          | ObjNet     | 35.3 | 31     | 30   | 27      | 29      | 29    | 32     | 31   | 28      | 32    | 30  | 59     | 25       | 49      | 46    | 50   |
|                                                          | IN-Cartoon | 42.3 | 43     | 41   | 40      | 34      | 36    | 39     | 38   | 35      | 39    | 25  | 67     | 23       | 54      | 62    | 62   |
| IN-Drawing                                               | 42.2       | 46   | 45     | 44   | 31      | 37      | 36    | 34     | 39   | 46      | 18    | 64  | 16     | 55       | 61      | 62    |      |
| LoRA<br>(Hu et al., 2021)                                | IN-V2      | 54.7 | 52     | 50   | 50      | 50      | 49    | 55     | 47   | 47      | 51    | 52  | 73     | 47       | 64      | 68    | 67   |
|                                                          | IN-A       | 54.8 | 52     | 50   | 50      | 50      | 49    | 55     | 47   | 47      | 51    | 52  | 73     | 47       | 64      | 68    | 67   |
|                                                          | IN-R       | 54.7 | 52     | 50   | 50      | 50      | 49    | 55     | 47   | 47      | 51    | 51  | 73     | 46       | 64      | 68    | 67   |
|                                                          | IN-Sketch  | 54.6 | 52     | 50   | 50      | 50      | 48    | 54     | 47   | 48      | 51    | 51  | 73     | 47       | 64      | 68    | 67   |
|                                                          | ObjNet     | 54.7 | 52     | 50   | 50      | 50      | 48    | 55     | 47   | 47      | 51    | 52  | 73     | 47       | 64      | 68    | 67   |
|                                                          | IN-Cartoon | 53.7 | 52     | 50   | 50      | 49      | 49    | 54     | 47   | 46      | 51    | 44  | 73     | 42       | 64      | 69    | 67   |
| IN-Drawing                                               | 54.5       | 53   | 51     | 50   | 49      | 49      | 53    | 47     | 48   | 53      | 48    | 73  | 45     | 64       | 68      | 67    |      |
| EWC<br>(Kirkpatrick et al., 2017)                        | IN-V2      | 55.1 | 52     | 50   | 50      | 50      | 49    | 55     | 48   | 48      | 51    | 53  | 74     | 47       | 64      | 68    | 67   |
|                                                          | IN-A       | 54.7 | 48     | 46   | 44      | 55      | 50    | 57     | 48   | 49      | 52    | 54  | 73     | 48       | 64      | 66    | 67   |
|                                                          | IN-R       | 56.3 | 53     | 51   | 50      | 53      | 50    | 57     | 48   | 49      | 53    | 55  | 74     | 50       | 65      | 68    | 69   |
|                                                          | IN-Sketch  | 55.6 | 53     | 52   | 51      | 51      | 50    | 55     | 47   | 48      | 52    | 52  | 73     | 48       | 64      | 69    | 68   |
|                                                          | ObjNet     | 56.5 | 51     | 49   | 48      | 55      | 51    | 58     | 51   | 49      | 52    | 57  | 74     | 50       | 65      | 68    | 69   |
|                                                          | IN-Cartoon | 54.3 | 51     | 49   | 48      | 50      | 47    | 54     | 46   | 47      | 50    | 51  | 74     | 48       | 63      | 69    | 67   |
| IN-Drawing                                               | 56.9       | 55   | 54     | 54   | 51      | 50      | 56    | 47     | 50   | 56      | 55    | 74  | 50     | 65       | 69      | 68    |      |
| LwF<br>(Li & Hoiem, 2017)                                | IN-V2      | 56.8 | 52     | 50   | 49      | 54      | 49    | 58     | 50   | 51      | 53    | 58  | 75     | 52       | 65      | 69    | 68   |
|                                                          | IN-A       | 53.9 | 45     | 42   | 40      | 57      | 48    | 58     | 47   | 49      | 49    | 58  | 73     | 54       | 61      | 64    | 65   |
|                                                          | IN-R       | 56.0 | 51     | 51   | 49      | 54      | 52    | 56     | 45   | 52      | 55    | 58  | 72     | 53       | 61      | 65    | 66   |
|                                                          | IN-Sketch  | 56.3 | 53     | 52   | 51      | 52      | 47    | 56     | 49   | 51      | 53    | 59  | 73     | 53       | 61      | 67    | 67   |
|                                                          | ObjNet     | 55.0 | 47     | 45   | 43      | 57      | 48    | 58     | 50   | 49      | 50    | 57  | 73     | 52       | 63      | 67    | 66   |
|                                                          | IN-Cartoon | 53.1 | 46     | 44   | 42      | 51      | 43    | 54     | 44   | 47      | 47    | 55  | 75     | 53       | 61      | 67    | 66   |
| IN-Drawing                                               | 56.2       | 55   | 53     | 53   | 48      | 48      | 55    | 44     | 52   | 60      | 56    | 74  | 48     | 62       | 68      | 67    |      |
| LP-FT<br>(Kumar et al., 2022)                            | IN-V2      | 56.8 | 51     | 49   | 48      | 54      | 49    | 59     | 50   | 51      | 53    | 58  | 75     | 52       | 65      | 69    | 68   |
|                                                          | IN-A       | 52.3 | 43     | 40   | 37      | 57      | 46    | 57     | 45   | 47      | 47    | 57  | 71     | 53       | 59      | 62    | 63   |
|                                                          | IN-R       | 54.5 | 50     | 50   | 48      | 53      | 52    | 55     | 43   | 51      | 55    | 55  | 71     | 48       | 60      | 63    | 65   |
|                                                          | IN-Sketch  | 55.6 | 53     | 52   | 51      | 52      | 47    | 55     | 48   | 50      | 52    | 58  | 72     | 52       | 60      | 66    | 66   |
|                                                          | ObjNet     | 53.0 | 44     | 42   | 39      | 56      | 47    | 56     | 47   | 48      | 49    | 54  | 72     | 49       | 61      | 64    | 65   |
|                                                          | IN-Cartoon | 51.1 | 44     | 42   | 40      | 49      | 40    | 52     | 41   | 46      | 46    | 52  | 74     | 51       | 59      | 66    | 65   |
| IN-Drawing                                               | 53.8       | 54   | 52     | 51   | 44      | 48      | 52    | 43     | 51   | 59      | 48    | 73  | 38     | 61       | 67      | 65    |      |
| WiSE-FT<br>(Wortsman et al., 2022b)                      | IN-V2      | 56.1 | 52     | 50   | 50      | 52      | 49    | 57     | 49   | 50      | 52    | 56  | 75     | 50       | 65      | 69    | 68   |
|                                                          | IN-A       | 57.0 | 51     | 49   | 47      | 54      | 50    | 59     | 50   | 52      | 53    | 59  | 75     | 53       | 65      | 69    | 68   |
|                                                          | IN-R       | 58.7 | 56     | 55   | 54      | 54      | 52    | 58     | 49   | 53      | 56    | 60  | 75     | 54       | 65      | 70    | 69   |
|                                                          | IN-Sketch  | 56.8 | 55     | 53   | 53      | 52      | 48    | 56     | 49   | 52      | 54    | 57  | 74     | 51       | 64      | 68    | 68   |
|                                                          | ObjNet     | 56.4 | 51     | 49   | 48      | 54      | 49    | 58     | 50   | 51      | 52    | 58  | 74     | 51       | 65      | 69    | 68   |
|                                                          | IN-Cartoon | 55.2 | 50     | 48   | 47      | 51      | 46    | 56     | 47   | 49      | 50    | 56  | 75     | 52       | 64      | 69    | 68   |
| IN-Drawing                                               | 57.9       | 57   | 55     | 55   | 51      | 50      | 57    | 47     | 53   | 58      | 57    | 75  | 51     | 65       | 70      | 68    |      |
| Model Soup<br>PRE-FT-EWC-LwF<br>(Wortsman et al., 2022a) | IN-V2      | 56.1 | 52     | 50   | 50      | 52      | 49    | 57     | 49   | 50      | 52    | 56  | 75     | 50       | 65      | 69    | 68   |
|                                                          | IN-A       | 57.0 | 50     | 47   | 46      | 56      | 51    | 60     | 50   | 52      | 53    | 60  | 75     | 54       | 65      | 68    | 69   |
|                                                          | IN-R       | 58.7 | 56     | 55   | 54      | 55      | 52    | 58     | 49   | 53      | 56    | 60  | 75     | 54       | 65      | 69    | 69   |
|                                                          | IN-Sketch  | 57.0 | 55     | 53   | 53      | 52      | 48    | 56     | 49   | 52      | 54    | 57  | 74     | 51       | 64      | 69    | 68   |
|                                                          | ObjNet     | 56.7 | 51     | 48   | 48      | 55      | 50    | 59     | 51   | 51      | 52    | 58  | 75     | 52       | 65      | 68    | 68   |
|                                                          | IN-Cartoon | 55.0 | 50     | 48   | 47      | 51      | 46    | 55     | 46   | 49      | 50    | 55  | 75     | 52       | 63      | 69    | 68   |
| IN-Drawing                                               | 58.0       | 57   | 55     | 55   | 51      | 50      | 57    | 47     | 53   | 58      | 57    | 75  | 51     | 65       | 70      | 68    |      |

Table S20: Accuracy of ImageNet-21K pretrained ViT-B/16 with different fine-tuning methods and downstream datasets on each ImageNet-C corruption For each corruption, accuracy is averaged across 5 levels of severity.

| Dataset                                                  | Method     | Avg. | Gauss. | Noise Shot | Impulse | Defocus | Glass | Blur Motion | Zoom | Snow | Frost | Weather Fog | Bright | Contrast | Digital Elastic | Pixel | JPEG |
|----------------------------------------------------------|------------|------|--------|------------|---------|---------|-------|-------------|------|------|-------|-------------|--------|----------|-----------------|-------|------|
| Pretrained                                               |            | 58.3 | 55     | 53         | 53      | 56      | 50    | 60          | 52   | 53   | 54    | 57          | 75     | 52       | 64              | 72    | 69   |
| FT                                                       | IN-V2      | 58.5 | 51     | 49         | 48      | 60      | 49    | 62          | 53   | 54   | 53    | 62          | 76     | 56       | 63              | 72    | 70   |
|                                                          | IN-A       | 55.0 | 47     | 45         | 43      | 56      | 45    | 60          | 50   | 51   | 50    | 57          | 73     | 55       | 58              | 69    | 66   |
|                                                          | IN-R       | 52.9 | 48     | 47         | 46      | 51      | 49    | 53          | 44   | 48   | 52    | 53          | 70     | 50       | 56              | 65    | 63   |
|                                                          | IN-Sketch  | 55.5 | 50     | 49         | 48      | 53      | 47    | 56          | 50   | 51   | 54    | 57          | 72     | 53       | 59              | 69    | 66   |
|                                                          | ObjNet     | 52.8 | 45     | 42         | 40      | 55      | 41    | 57          | 48   | 47   | 47    | 55          | 72     | 52       | 57              | 68    | 66   |
|                                                          | IN-Cartoon | 52.9 | 44     | 41         | 39      | 53      | 41    | 57          | 46   | 48   | 46    | 54          | 76     | 53       | 58              | 71    | 67   |
|                                                          | IN-Drawing | 55.3 | 52     | 51         | 51      | 48      | 47    | 55          | 44   | 52   | 59    | 55          | 74     | 49       | 60              | 69    | 64   |
| Linear Probing                                           | IN-V2      | 58.5 | 55     | 53         | 53      | 56      | 50    | 61          | 52   | 53   | 54    | 58          | 75     | 53       | 64              | 72    | 69   |
|                                                          | IN-A       | 58.7 | 55     | 53         | 52      | 56      | 50    | 61          | 54   | 54   | 54    | 59          | 75     | 53       | 65              | 71    | 70   |
|                                                          | IN-R       | 56.7 | 55     | 53         | 53      | 52      | 49    | 56          | 50   | 52   | 54    | 52          | 74     | 48       | 63              | 70    | 69   |
|                                                          | IN-Sketch  | 56.4 | 55     | 53         | 53      | 53      | 49    | 57          | 49   | 51   | 53    | 52          | 73     | 48       | 62              | 71    | 69   |
|                                                          | ObjNet     | 58.9 | 55     | 53         | 53      | 57      | 50    | 61          | 54   | 53   | 54    | 59          | 75     | 53       | 65              | 71    | 70   |
|                                                          | IN-Cartoon | 56.9 | 54     | 53         | 52      | 52      | 47    | 58          | 50   | 52   | 52    | 54          | 76     | 50       | 63              | 72    | 70   |
|                                                          | IN-Drawing | 59.0 | 56     | 55         | 55      | 54      | 50    | 60          | 52   | 54   | 57    | 58          | 76     | 51       | 65              | 72    | 70   |
| Visual Prompt<br>(Bahng et al., 2022)                    | IN-V2      | 45.5 | 42     | 41         | 39      | 43      | 34    | 45          | 43   | 38   | 40    | 42          | 66     | 37       | 55              | 59    | 59   |
|                                                          | IN-A       | 38.3 | 35     | 33         | 31      | 32      | 25    | 37          | 34   | 32   | 33    | 38          | 59     | 31       | 49              | 52    | 52   |
|                                                          | IN-R       | 38.3 | 36     | 35         | 33      | 34      | 28    | 35          | 33   | 32   | 36    | 32          | 60     | 28       | 47              | 52    | 52   |
|                                                          | IN-Sketch  | 41.1 | 39     | 38         | 36      | 37      | 29    | 38          | 36   | 35   | 38    | 36          | 63     | 30       | 50              | 55    | 57   |
|                                                          | ObjNet     | 36.9 | 33     | 31         | 29      | 32      | 25    | 35          | 34   | 29   | 31    | 35          | 59     | 29       | 48              | 50    | 53   |
|                                                          | IN-Cartoon | 41.9 | 37     | 36         | 34      | 39      | 29    | 41          | 38   | 36   | 35    | 37          | 65     | 32       | 52              | 58    | 57   |
|                                                          | IN-Drawing | 41.8 | 40     | 40         | 38      | 36      | 32    | 38          | 36   | 38   | 43    | 32          | 63     | 25       | 52              | 57    | 57   |
| LoRA<br>(Hu et al., 2021)                                | IN-V2      | 58.4 | 55     | 53         | 53      | 56      | 50    | 60          | 52   | 53   | 54    | 57          | 75     | 52       | 64              | 72    | 69   |
|                                                          | IN-A       | 58.9 | 55     | 53         | 52      | 56      | 50    | 61          | 54   | 54   | 54    | 59          | 76     | 53       | 65              | 72    | 70   |
|                                                          | IN-R       | 53.6 | 54     | 52         | 52      | 46      | 46    | 50          | 46   | 51   | 53    | 44          | 73     | 40       | 61              | 68    | 68   |
|                                                          | IN-Sketch  | 56.3 | 54     | 53         | 52      | 52      | 50    | 56          | 49   | 51   | 53    | 50          | 73     | 48       | 62              | 71    | 69   |
|                                                          | ObjNet     | 59.2 | 55     | 53         | 53      | 57      | 50    | 62          | 55   | 53   | 54    | 59          | 76     | 53       | 65              | 72    | 71   |
|                                                          | IN-Cartoon | 56.1 | 54     | 52         | 52      | 51      | 47    | 57          | 49   | 51   | 52    | 52          | 75     | 49       | 61              | 71    | 69   |
|                                                          | IN-Drawing | 58.0 | 56     | 54         | 54      | 53      | 48    | 59          | 51   | 53   | 56    | 57          | 75     | 48       | 64              | 72    | 69   |
| EWC<br>(Kirkpatrick et al., 2017)                        | IN-V2      | 59.4 | 55     | 53         | 52      | 58      | 51    | 62          | 54   | 54   | 54    | 59          | 76     | 54       | 65              | 73    | 70   |
|                                                          | IN-A       | 58.8 | 51     | 49         | 49      | 60      | 49    | 63          | 54   | 55   | 54    | 62          | 76     | 56       | 63              | 72    | 69   |
|                                                          | IN-R       | 57.6 | 54     | 53         | 52      | 55      | 50    | 58          | 50   | 52   | 55    | 59          | 74     | 54       | 62              | 68    | 67   |
|                                                          | IN-Sketch  | 59.3 | 56     | 55         | 54      | 57      | 51    | 61          | 53   | 54   | 55    | 59          | 76     | 55       | 64              | 72    | 69   |
|                                                          | ObjNet     | 58.2 | 53     | 51         | 51      | 58      | 49    | 62          | 53   | 53   | 52    | 60          | 74     | 53       | 63              | 71    | 69   |
|                                                          | IN-Cartoon | 56.7 | 51     | 49         | 49      | 55      | 46    | 59          | 49   | 52   | 51    | 57          | 76     | 54       | 62              | 72    | 68   |
|                                                          | IN-Drawing | 59.4 | 55     | 54         | 54      | 57      | 51    | 62          | 52   | 53   | 59    | 61          | 75     | 55       | 65              | 71    | 68   |
| LwF<br>(Li & Hoiem, 2017)                                | IN-V2      | 59.3 | 53     | 52         | 51      | 59      | 51    | 62          | 54   | 54   | 54    | 61          | 76     | 55       | 64              | 73    | 70   |
|                                                          | IN-A       | 58.1 | 51     | 49         | 48      | 57      | 48    | 62          | 53   | 54   | 54    | 61          | 75     | 56       | 62              | 71    | 68   |
|                                                          | IN-R       | 57.3 | 53     | 52         | 51      | 56      | 53    | 58          | 49   | 52   | 55    | 57          | 73     | 53       | 61              | 69    | 67   |
|                                                          | IN-Sketch  | 57.3 | 52     | 51         | 50      | 55      | 48    | 58          | 51   | 53   | 55    | 58          | 74     | 55       | 61              | 70    | 68   |
|                                                          | ObjNet     | 57.0 | 50     | 48         | 47      | 57      | 47    | 60          | 52   | 51   | 52    | 59          | 74     | 55       | 62              | 71    | 68   |
|                                                          | IN-Cartoon | 57.9 | 51     | 48         | 47      | 57      | 47    | 61          | 51   | 53   | 52    | 59          | 78     | 57       | 64              | 74    | 70   |
|                                                          | IN-Drawing | 58.1 | 55     | 53         | 53      | 52      | 50    | 59          | 48   | 54   | 61    | 58          | 76     | 52       | 63              | 72    | 67   |
| LP-FT<br>(Kumar et al., 2022)                            | IN-V2      | 58.7 | 52     | 50         | 49      | 60      | 49    | 62          | 53   | 54   | 54    | 61          | 76     | 55       | 63              | 73    | 70   |
|                                                          | IN-A       | 56.7 | 49     | 47         | 46      | 57      | 46    | 61          | 52   | 53   | 52    | 59          | 74     | 56       | 61              | 70    | 67   |
|                                                          | IN-R       | 55.4 | 51     | 50         | 49      | 53      | 51    | 55          | 46   | 51   | 54    | 55          | 72     | 52       | 59              | 67    | 66   |
|                                                          | IN-Sketch  | 55.8 | 52     | 51         | 50      | 53      | 46    | 56          | 48   | 51   | 54    | 55          | 72     | 52       | 59              | 69    | 67   |
|                                                          | ObjNet     | 55.5 | 48     | 45         | 43      | 57      | 44    | 60          | 51   | 51   | 51    | 57          | 74     | 54       | 61              | 70    | 68   |
|                                                          | IN-Cartoon | 54.4 | 46     | 44         | 42      | 54      | 42    | 58          | 47   | 50   | 48    | 55          | 77     | 54       | 60              | 73    | 68   |
|                                                          | IN-Drawing | 56.0 | 53     | 52         | 52      | 48      | 48    | 55          | 45   | 53   | 60    | 56          | 75     | 48       | 61              | 70    | 66   |
| WiSE-FT<br>(Wortsman et al., 2022b)                      | IN-V2      | 59.3 | 54     | 52         | 51      | 58      | 50    | 62          | 53   | 55   | 55    | 60          | 76     | 55       | 64              | 73    | 70   |
|                                                          | IN-A       | 59.0 | 53     | 51         | 50      | 58      | 50    | 62          | 54   | 55   | 55    | 61          | 76     | 56       | 64              | 72    | 69   |
|                                                          | IN-R       | 60.0 | 55     | 54         | 53      | 58      | 54    | 61          | 53   | 55   | 58    | 61          | 76     | 56       | 64              | 72    | 69   |
|                                                          | IN-Sketch  | 59.2 | 55     | 54         | 53      | 56      | 50    | 60          | 53   | 55   | 57    | 60          | 75     | 56       | 63              | 72    | 69   |
|                                                          | ObjNet     | 58.2 | 52     | 50         | 49      | 58      | 49    | 61          | 53   | 53   | 53    | 60          | 75     | 55       | 63              | 72    | 69   |
|                                                          | IN-Cartoon | 58.1 | 52     | 49         | 49      | 57      | 47    | 61          | 51   | 54   | 52    | 59          | 77     | 56       | 64              | 74    | 70   |
|                                                          | IN-Drawing | 59.8 | 57     | 55         | 55      | 55      | 51    | 61          | 51   | 56   | 60    | 60          | 77     | 54       | 65              | 73    | 69   |
| Model Soup<br>PRE-FT-EWC-LwF<br>(Wortsman et al., 2022a) | IN-V2      | 59.5 | 54     | 52         | 52      | 59      | 51    | 62          | 54   | 55   | 55    | 60          | 76     | 55       | 64              | 73    | 70   |
|                                                          | IN-A       | 59.1 | 52     | 50         | 49      | 58      | 49    | 63          | 54   | 55   | 55    | 62          | 76     | 57       | 64              | 72    | 69   |
|                                                          | IN-R       | 59.8 | 55     | 54         | 53      | 58      | 54    | 61          | 52   | 55   | 58    | 60          | 76     | 56       | 64              | 71    | 69   |
|                                                          | IN-Sketch  | 59.4 | 55     | 54         | 53      | 57      | 50    | 61          | 53   | 55   | 57    | 60          | 76     | 56       | 64              | 72    | 69   |
|                                                          | ObjNet     | 58.3 | 53     | 50         | 50      | 58      | 49    | 61          | 53   | 53   | 53    | 60          | 75     | 55       | 63              | 72    | 69   |
|                                                          | IN-Cartoon | 58.2 | 52     | 49         | 49      | 57      | 47    | 61          | 51   | 51   | 53    | 52          | 59     | 56       | 64              | 74    | 70   |
|                                                          | IN-Drawing | 60.1 | 57     | 55         | 55      | 55      | 51    | 61          | 51   | 56   | 61    | 61          | 77     | 55       | 65              | 73    | 69   |

Table S21: Accuracy of ViT-B/16 pretrained on ImageNet-21K-P, using different fine-tuning methods and downstream datasets on each ImageNet-C corruption For each corruption, accuracy is averaged across 5 levels of severity.

| Dataset                                                  | Method     | Avg. | Gauss. | Noise Shot | Impulse | Defocus | Glass | Blur Motion | Zoom | Snow | Frost | Weather Fog | Bright | Contrast | Digital Elastic | Pixel | JPEG |
|----------------------------------------------------------|------------|------|--------|------------|---------|---------|-------|-------------|------|------|-------|-------------|--------|----------|-----------------|-------|------|
| Pretrained                                               |            | 61.4 | 60     | 59         | 58      | 57      | 46    | 60          | 53   | 55   | 55    | 65          | 79     | 69       | 64              | 70    | 71   |
| FT                                                       | IN-V2      | 62.1 | 58     | 57         | 55      | 62      | 48    | 63          | 55   | 57   | 55    | 67          | 79     | 69       | 62              | 73    | 73   |
|                                                          | IN-A       | 60.5 | 56     | 55         | 52      | 63      | 48    | 63          | 53   | 54   | 51    | 64          | 77     | 69       | 60              | 71    | 72   |
|                                                          | IN-R       | 57.5 | 55     | 55         | 53      | 56      | 50    | 57          | 47   | 52   | 55    | 59          | 73     | 57       | 58              | 66    | 68   |
|                                                          | IN-Sketch  | 59.3 | 57     | 57         | 56      | 54      | 44    | 58          | 52   | 54   | 56    | 61          | 76     | 65       | 60              | 70    | 70   |
|                                                          | ObjNet     | 57.7 | 54     | 54         | 50      | 58      | 43    | 60          | 50   | 49   | 48    | 60          | 76     | 65       | 58              | 69    | 71   |
|                                                          | IN-Cartoon | 56.1 | 53     | 52         | 49      | 55      | 38    | 58          | 47   | 51   | 47    | 59          | 79     | 63       | 58              | 65    | 66   |
|                                                          | IN-Drawing | 57.9 | 60     | 58         | 58      | 46      | 46    | 57          | 46   | 54   | 61    | 57          | 78     | 57       | 60              | 66    | 65   |
| Linear Probing                                           | IN-V2      | 61.4 | 59     | 59         | 58      | 57      | 46    | 60          | 53   | 55   | 55    | 65          | 79     | 69       | 64              | 70    | 71   |
|                                                          | IN-A       | 61.8 | 59     | 59         | 58      | 58      | 46    | 61          | 54   | 56   | 55    | 66          | 79     | 70       | 64              | 70    | 71   |
|                                                          | IN-R       | 61.0 | 59     | 58         | 57      | 56      | 46    | 60          | 52   | 55   | 55    | 64          | 79     | 68       | 64              | 70    | 71   |
|                                                          | IN-Sketch  | 60.8 | 58     | 57         | 56      | 57      | 45    | 59          | 52   | 55   | 55    | 64          | 78     | 69       | 64              | 70    | 71   |
|                                                          | ObjNet     | 61.9 | 59     | 59         | 58      | 58      | 47    | 61          | 54   | 55   | 55    | 66          | 79     | 70       | 64              | 70    | 71   |
|                                                          | IN-Cartoon | 61.3 | 59     | 59         | 58      | 56      | 45    | 60          | 52   | 55   | 55    | 65          | 80     | 69       | 64              | 71    | 72   |
|                                                          | IN-Drawing | 62.0 | 60     | 59         | 58      | 56      | 47    | 60          | 52   | 57   | 59    | 64          | 80     | 66       | 66              | 72    | 73   |
| Visual Prompt<br>(Bahng et al., 2017)                    | IN-V2      | 49.6 | 45     | 44         | 43      | 45      | 34    | 46          | 45   | 43   | 44    | 54          | 72     | 52       | 56              | 59    | 61   |
|                                                          | IN-A       | 44.6 | 38     | 36         | 35      | 40      | 29    | 43          | 40   | 37   | 39    | 52          | 68     | 49       | 51              | 54    | 58   |
|                                                          | IN-R       | 40.5 | 35     | 35         | 33      | 35      | 26    | 35          | 33   | 35   | 41    | 45          | 65     | 42       | 48              | 45    | 53   |
|                                                          | IN-Sketch  | 44.1 | 40     | 40         | 38      | 37      | 27    | 39          | 37   | 39   | 44    | 48          | 67     | 46       | 51              | 50    | 57   |
|                                                          | ObjNet     | 34.8 | 27     | 26         | 25      | 28      | 22    | 32          | 30   | 27   | 30    | 41          | 62     | 37       | 43              | 43    | 49   |
|                                                          | IN-Cartoon | 44.2 | 37     | 36         | 34      | 40      | 28    | 42          | 39   | 37   | 38    | 49          | 70     | 48       | 52              | 57    | 57   |
|                                                          | IN-Drawing | 44.3 | 44     | 44         | 42      | 37      | 32    | 38          | 36   | 39   | 48    | 42          | 66     | 38       | 52              | 53    | 55   |
| LoRA<br>(Hu et al., 2021)                                | IN-V2      | 61.3 | 59     | 59         | 57      | 57      | 46    | 60          | 53   | 55   | 55    | 64          | 79     | 69       | 64              | 70    | 72   |
|                                                          | IN-A       | 62.1 | 59     | 59         | 57      | 58      | 48    | 61          | 54   | 55   | 55    | 66          | 79     | 71       | 65              | 71    | 71   |
|                                                          | IN-R       | 61.2 | 59     | 58         | 57      | 56      | 47    | 60          | 53   | 55   | 55    | 65          | 79     | 68       | 64              | 70    | 72   |
|                                                          | IN-Sketch  | 61.4 | 59     | 59         | 57      | 58      | 46    | 60          | 53   | 55   | 56    | 64          | 79     | 68       | 64              | 71    | 72   |
|                                                          | ObjNet     | 62.1 | 59     | 59         | 58      | 59      | 48    | 61          | 54   | 55   | 55    | 66          | 79     | 71       | 65              | 71    | 72   |
|                                                          | IN-Cartoon | 60.3 | 58     | 58         | 57      | 55      | 45    | 58          | 52   | 54   | 54    | 62          | 79     | 66       | 63              | 70    | 72   |
|                                                          | IN-Drawing | 61.6 | 59     | 59         | 58      | 56      | 47    | 59          | 51   | 57   | 59    | 64          | 79     | 67       | 65              | 71    | 72   |
| EWC<br>(Kirkpatrick et al., 2017)                        | IN-V2      | 62.4 | 60     | 59         | 58      | 58      | 47    | 62          | 54   | 57   | 56    | 66          | 80     | 70       | 65              | 72    | 72   |
|                                                          | IN-A       | 63.7 | 59     | 59         | 57      | 63      | 49    | 65          | 57   | 58   | 56    | 69          | 80     | 72       | 65              | 73    | 73   |
|                                                          | IN-R       | 55.3 | 58     | 58         | 56      | 41      | 45    | 52          | 45   | 51   | 56    | 50          | 75     | 50       | 60              | 63    | 69   |
|                                                          | IN-Sketch  | 61.4 | 60     | 60         | 58      | 55      | 46    | 60          | 54   | 55   | 57    | 64          | 78     | 67       | 64              | 70    | 72   |
|                                                          | ObjNet     | 62.5 | 59     | 59         | 58      | 60      | 47    | 62          | 55   | 56   | 55    | 67          | 80     | 70       | 64              | 72    | 72   |
|                                                          | IN-Cartoon | 59.9 | 57     | 56         | 55      | 56      | 42    | 59          | 51   | 54   | 53    | 64          | 79     | 70       | 63              | 70    | 71   |
|                                                          | IN-Drawing | 60.9 | 60     | 60         | 58      | 53      | 48    | 60          | 51   | 57   | 62    | 62          | 78     | 61       | 64              | 68    | 70   |
| LwF<br>(Li & Hoiem, 2017)                                | IN-V2      | 62.9 | 59     | 58         | 57      | 62      | 48    | 63          | 55   | 58   | 56    | 67          | 80     | 71       | 64              | 73    | 73   |
|                                                          | IN-A       | 63.5 | 59     | 59         | 57      | 63      | 49    | 65          | 57   | 58   | 57    | 68          | 79     | 71       | 64              | 73    | 73   |
|                                                          | IN-R       | 62.0 | 59     | 59         | 57      | 59      | 53    | 61          | 53   | 57   | 59    | 65          | 77     | 66       | 63              | 71    | 71   |
|                                                          | IN-Sketch  | 61.1 | 59     | 59         | 57      | 57      | 45    | 60          | 54   | 56   | 57    | 64          | 77     | 68       | 62              | 71    | 71   |
|                                                          | ObjNet     | 61.8 | 59     | 59         | 56      | 61      | 46    | 63          | 54   | 55   | 54    | 66          | 79     | 69       | 62              | 72    | 72   |
|                                                          | IN-Cartoon | 61.3 | 58     | 57         | 55      | 60      | 44    | 62          | 53   | 56   | 54    | 65          | 82     | 68       | 64              | 70    | 71   |
|                                                          | IN-Drawing | 61.2 | 61     | 60         | 58      | 51      | 48    | 61          | 50   | 58   | 63    | 62          | 80     | 64       | 63              | 70    | 69   |
| LP-FT<br>(Kumar et al., 2022)                            | IN-V2      | 62.5 | 58     | 58         | 56      | 62      | 47    | 63          | 55   | 57   | 55    | 67          | 79     | 71       | 63              | 73    | 73   |
|                                                          | IN-A       | 62.6 | 58     | 57         | 55      | 63      | 50    | 65          | 56   | 57   | 55    | 67          | 79     | 70       | 63              | 73    | 72   |
|                                                          | IN-R       | 60.5 | 57     | 57         | 55      | 57      | 52    | 60          | 51   | 55   | 58    | 63          | 76     | 64       | 62              | 70    | 70   |
|                                                          | IN-Sketch  | 60.2 | 58     | 57         | 56      | 56      | 45    | 59          | 52   | 56   | 56    | 63          | 77     | 66       | 61              | 70    | 71   |
|                                                          | ObjNet     | 60.6 | 57     | 57         | 54      | 60      | 46    | 62          | 52   | 54   | 53    | 64          | 78     | 67       | 61              | 71    | 72   |
|                                                          | IN-Cartoon | 58.8 | 56     | 55         | 53      | 58      | 40    | 60          | 50   | 54   | 51    | 62          | 80     | 65       | 61              | 68    | 69   |
|                                                          | IN-Drawing | 58.7 | 60     | 59         | 58      | 48      | 46    | 58          | 46   | 56   | 62    | 58          | 79     | 60       | 61              | 67    | 66   |
| WiSE-FT<br>(Wortsman et al., 2022b)                      | IN-V2      | 63.3 | 60     | 59         | 58      | 61      | 48    | 63          | 55   | 58   | 57    | 68          | 80     | 72       | 65              | 73    | 73   |
|                                                          | IN-A       | 64.1 | 60     | 60         | 58      | 63      | 49    | 65          | 57   | 59   | 58    | 69          | 80     | 73       | 65              | 73    | 73   |
|                                                          | IN-R       | 64.3 | 61     | 61         | 60      | 61      | 52    | 63          | 55   | 59   | 61    | 68          | 80     | 71       | 66              | 73    | 73   |
|                                                          | IN-Sketch  | 62.7 | 61     | 60         | 59      | 58      | 46    | 61          | 55   | 58   | 58    | 66          | 79     | 71       | 64              | 72    | 73   |
|                                                          | ObjNet     | 62.9 | 60     | 59         | 58      | 61      | 47    | 63          | 55   | 57   | 56    | 67          | 80     | 71       | 64              | 73    | 73   |
|                                                          | IN-Cartoon | 61.4 | 59     | 58         | 56      | 59      | 43    | 62          | 52   | 56   | 54    | 65          | 81     | 70       | 64              | 70    | 71   |
|                                                          | IN-Drawing | 63.5 | 63     | 62         | 61      | 56      | 48    | 63          | 53   | 59   | 63    | 66          | 81     | 69       | 65              | 71    | 71   |
| Model Soup<br>PRE-FT-EWC-LwF<br>(Wortsman et al., 2022a) | IN-V2      | 63.3 | 60     | 59         | 58      | 61      | 47    | 63          | 55   | 58   | 57    | 68          | 80     | 72       | 65              | 73    | 73   |
|                                                          | IN-A       | 64.1 | 60     | 60         | 58      | 63      | 49    | 65          | 57   | 59   | 57    | 69          | 80     | 73       | 65              | 73    | 73   |
|                                                          | IN-R       | 64.1 | 61     | 61         | 59      | 61      | 51    | 63          | 55   | 59   | 61    | 68          | 79     | 71       | 66              | 73    | 73   |
|                                                          | IN-Sketch  | 62.7 | 61     | 60         | 59      | 58      | 46    | 61          | 55   | 58   | 58    | 66          | 79     | 71       | 64              | 72    | 73   |
|                                                          | ObjNet     | 62.9 | 60     | 59         | 58      | 61      | 47    | 63          | 55   | 57   | 56    | 67          | 80     | 71       | 64              | 72    | 73   |
|                                                          | IN-Cartoon | 61.4 | 58     | 58         | 56      | 59      | 43    | 61          | 53   | 56   | 54    | 65          | 81     | 70       | 64              | 70    | 71   |
|                                                          | IN-Drawing | 63.4 | 63     | 62         | 61      | 56      | 48    | 63          | 53   | 59   | 63    | 66          | 81     | 69       | 65              | 71    | 71   |



Table S22: Accuracy of ImageNet-21K with AugReg pretrained ViT-B/16 with different fine-tuning methods and downstream datasets on each ImageNet-C corruption For each corruption, accuracy is averaged across 5 levels of severity.

| Dataset                                                  | Method     | Avg. | Gauss. | Noise Shot | Impulse | Defocus | Glass | Blur Motion | Zoom | Snow | Frost | Weather Fog | Bright | Contrast | Digital Elastic | Pixel | JPEG |
|----------------------------------------------------------|------------|------|--------|------------|---------|---------|-------|-------------|------|------|-------|-------------|--------|----------|-----------------|-------|------|
| Pretrained                                               |            | 66.5 | 67     | 66         | 66      | 63      | 54    | 67          | 59   | 66   | 62    | 69          | 80     | 65       | 66              | 75    | 74   |
| FT                                                       | IN-V2      | 64.4 | 64     | 62         | 63      | 61      | 56    | 64          | 55   | 64   | 61    | 66          | 77     | 63       | 63              | 73    | 73   |
|                                                          | IN-A       | 56.3 | 57     | 56         | 56      | 52      | 48    | 56          | 46   | 53   | 51    | 56          | 70     | 53       | 55              | 67    | 68   |
|                                                          | IN-R       | 55.7 | 54     | 53         | 53      | 53      | 51    | 54          | 43   | 52   | 56    | 57          | 69     | 54       | 56              | 65    | 65   |
|                                                          | IN-Sketch  | 54.8 | 54     | 53         | 52      | 52      | 44    | 53          | 43   | 52   | 55    | 57          | 70     | 55       | 53              | 64    | 65   |
|                                                          | ObjNet     | 54.9 | 55     | 53         | 52      | 53      | 43    | 56          | 41   | 52   | 50    | 54          | 72     | 52       | 56              | 67    | 67   |
|                                                          | IN-Cartoon | 61.5 | 61     | 59         | 58      | 56      | 46    | 63          | 48   | 60   | 57    | 60          | 84     | 60       | 63              | 75    | 72   |
|                                                          | IN-Drawing | 59.9 | 57     | 54         | 54      | 51      | 48    | 60          | 45   | 58   | 65    | 64          | 81     | 56       | 62              | 74    | 70   |
| Linear Probing                                           | IN-V2      | 65.7 | 66     | 65         | 64      | 62      | 54    | 66          | 58   | 65   | 62    | 68          | 79     | 65       | 65              | 74    | 73   |
|                                                          | IN-A       | 65.8 | 65     | 64         | 64      | 62      | 54    | 66          | 58   | 65   | 62    | 68          | 79     | 65       | 65              | 74    | 73   |
|                                                          | IN-R       | 64.0 | 63     | 62         | 62      | 62      | 53    | 64          | 56   | 63   | 61    | 66          | 77     | 63       | 64              | 72    | 71   |
|                                                          | IN-Sketch  | 62.1 | 62     | 61         | 60      | 60      | 50    | 62          | 54   | 61   | 59    | 65          | 75     | 62       | 61              | 70    | 69   |
|                                                          | ObjNet     | 65.9 | 65     | 64         | 64      | 64      | 54    | 67          | 59   | 65   | 62    | 69          | 79     | 64       | 65              | 74    | 73   |
|                                                          | IN-Cartoon | 69.9 | 70     | 69         | 68      | 67      | 55    | 71          | 62   | 69   | 64    | 72          | 85     | 69       | 69              | 79    | 78   |
|                                                          | IN-Drawing | 70.0 | 70     | 69         | 69      | 67      | 59    | 71          | 61   | 70   | 69    | 73          | 83     | 69       | 69              | 77    | 76   |
| Visual Prompt<br>(Bahng et al., 2022)                    | IN-V2      | 56.9 | 53     | 51         | 50      | 55      | 43    | 57          | 51   | 54   | 52    | 59          | 75     | 57       | 60              | 68    | 68   |
|                                                          | IN-A       | 51.1 | 44     | 41         | 40      | 47      | 34    | 52          | 46   | 50   | 47    | 57          | 71     | 53       | 54              | 64    | 65   |
|                                                          | IN-R       | 46.4 | 43     | 42         | 40      | 40      | 35    | 42          | 36   | 46   | 48    | 46          | 68     | 40       | 51              | 58    | 60   |
|                                                          | IN-Sketch  | 51.7 | 48     | 46         | 44      | 48      | 37    | 49          | 44   | 50   | 52    | 54          | 72     | 50       | 55              | 62    | 64   |
|                                                          | ObjNet     | 42.5 | 33     | 32         | 29      | 40      | 25    | 42          | 36   | 42   | 40    | 47          | 67     | 43       | 47              | 56    | 58   |
|                                                          | IN-Cartoon | 53.1 | 51     | 49         | 49      | 50      | 37    | 52          | 45   | 51   | 49    | 51          | 74     | 50       | 57              | 66    | 65   |
|                                                          | IN-Drawing | 54.5 | 55     | 53         | 53      | 48      | 43    | 51          | 45   | 51   | 58    | 53          | 73     | 46       | 57              | 66    | 64   |
| LoRA<br>(Hu et al., 2021)                                | IN-V2      | 67.2 | 67     | 66         | 66      | 64      | 55    | 68          | 60   | 66   | 63    | 70          | 80     | 67       | 67              | 75    | 74   |
|                                                          | IN-A       | 67.8 | 67     | 66         | 66      | 66      | 56    | 69          | 61   | 67   | 64    | 71          | 80     | 67       | 67              | 76    | 75   |
|                                                          | IN-R       | 67.0 | 67     | 66         | 66      | 65      | 56    | 67          | 58   | 66   | 65    | 69          | 79     | 66       | 66              | 75    | 74   |
|                                                          | IN-Sketch  | 66.9 | 67     | 66         | 65      | 65      | 55    | 67          | 59   | 67   | 64    | 70          | 79     | 67       | 66              | 74    | 74   |
|                                                          | ObjNet     | 67.2 | 67     | 66         | 65      | 66      | 54    | 68          | 60   | 67   | 63    | 70          | 80     | 65       | 66              | 75    | 74   |
|                                                          | IN-Cartoon | 66.4 | 66     | 65         | 65      | 64      | 54    | 67          | 59   | 66   | 62    | 69          | 80     | 65       | 65              | 74    | 74   |
|                                                          | IN-Drawing | 67.1 | 66     | 65         | 65      | 64      | 57    | 67          | 57   | 68   | 67    | 71          | 80     | 67       | 66              | 74    | 73   |
| EWC<br>(Kirkpatrick et al., 2017)                        | IN-V2      | 67.7 | 67     | 66         | 65      | 65      | 56    | 68          | 59   | 68   | 65    | 71          | 80     | 68       | 66              | 76    | 75   |
|                                                          | IN-A       | 65.8 | 65     | 64         | 64      | 63      | 55    | 67          | 57   | 66   | 62    | 69          | 78     | 67       | 63              | 74    | 73   |
|                                                          | IN-R       | 63.9 | 62     | 61         | 60      | 62      | 58    | 63          | 52   | 62   | 64    | 66          | 77     | 65       | 63              | 71    | 72   |
|                                                          | IN-Sketch  | 66.2 | 65     | 65         | 64      | 64      | 55    | 66          | 58   | 65   | 65    | 70          | 78     | 67       | 64              | 74    | 73   |
|                                                          | ObjNet     | 63.5 | 63     | 62         | 61      | 62      | 51    | 65          | 52   | 64   | 60    | 67          | 77     | 63       | 61              | 73    | 72   |
|                                                          | IN-Cartoon | 63.9 | 63     | 62         | 62      | 62      | 49    | 66          | 55   | 64   | 58    | 66          | 79     | 65       | 62              | 73    | 71   |
|                                                          | IN-Drawing | 65.9 | 64     | 63         | 62      | 61      | 54    | 66          | 56   | 66   | 68    | 70          | 79     | 66       | 64              | 75    | 73   |
| LwF<br>(Li & Hoiem, 2017)                                | IN-V2      | 66.0 | 66     | 65         | 65      | 63      | 55    | 66          | 57   | 65   | 62    | 67          | 79     | 64       | 66              | 75    | 75   |
|                                                          | IN-A       | 64.1 | 64     | 63         | 64      | 61      | 55    | 65          | 55   | 62   | 59    | 65          | 78     | 62       | 64              | 73    | 73   |
|                                                          | IN-R       | 64.1 | 63     | 62         | 62      | 61      | 55    | 64          | 55   | 62   | 63    | 66          | 78     | 62       | 64              | 72    | 72   |
|                                                          | IN-Sketch  | 61.5 | 61     | 60         | 60      | 58      | 50    | 61          | 52   | 59   | 60    | 64          | 76     | 60       | 61              | 70    | 70   |
|                                                          | ObjNet     | 62.2 | 63     | 61         | 61      | 60      | 50    | 63          | 50   | 61   | 57    | 63          | 77     | 59       | 63              | 73    | 72   |
|                                                          | IN-Cartoon | 71.7 | 71     | 69         | 69      | 67      | 59    | 71          | 60   | 70   | 68    | 73          | 90     | 71       | 73              | 82    | 82   |
|                                                          | IN-Drawing | 68.5 | 66     | 64         | 64      | 64      | 57    | 70          | 56   | 66   | 71    | 72          | 87     | 62       | 69              | 82    | 79   |
| LP-FT<br>(Kumar et al., 2022)                            | IN-V2      | 65.6 | 65     | 64         | 64      | 62      | 54    | 65          | 57   | 66   | 62    | 68          | 78     | 66       | 65              | 74    | 73   |
|                                                          | IN-A       | 63.2 | 62     | 61         | 61      | 60      | 53    | 63          | 55   | 62   | 59    | 65          | 77     | 63       | 62              | 72    | 71   |
|                                                          | IN-R       | 57.0 | 54     | 54         | 53      | 54      | 51    | 56          | 47   | 55   | 57    | 59          | 71     | 55       | 58              | 67    | 65   |
|                                                          | IN-Sketch  | 58.5 | 57     | 56         | 56      | 56      | 48    | 58          | 50   | 57   | 57    | 61          | 72     | 58       | 57              | 66    | 66   |
|                                                          | ObjNet     | 59.9 | 59     | 58         | 58      | 57      | 47    | 61          | 48   | 58   | 56    | 61          | 75     | 58       | 60              | 70    | 70   |
|                                                          | IN-Cartoon | 68.6 | 69     | 67         | 67      | 63      | 52    | 70          | 58   | 69   | 64    | 70          | 88     | 68       | 68              | 80    | 77   |
|                                                          | IN-Drawing | 66.9 | 65     | 62         | 63      | 64      | 55    | 69          | 54   | 65   | 68    | 71          | 84     | 64       | 67              | 80    | 75   |
| WiSE-FT<br>(Wortsman et al., 2022b)                      | IN-V2      | 68.0 | 68     | 67         | 67      | 65      | 57    | 68          | 60   | 68   | 65    | 70          | 80     | 67       | 67              | 76    | 76   |
|                                                          | IN-A       | 66.5 | 67     | 66         | 66      | 62      | 55    | 67          | 57   | 66   | 62    | 68          | 79     | 65       | 66              | 75    | 74   |
|                                                          | IN-R       | 66.9 | 66     | 65         | 65      | 64      | 59    | 66          | 57   | 66   | 67    | 69          | 79     | 67       | 67              | 74    | 74   |
|                                                          | IN-Sketch  | 65.1 | 65     | 64         | 64      | 61      | 53    | 64          | 55   | 65   | 64    | 68          | 78     | 65       | 64              | 73    | 73   |
|                                                          | ObjNet     | 65.6 | 66     | 64         | 64      | 63      | 53    | 67          | 55   | 65   | 62    | 68          | 79     | 65       | 65              | 74    | 74   |
|                                                          | IN-Cartoon | 68.6 | 69     | 67         | 67      | 64      | 54    | 69          | 58   | 69   | 64    | 70          | 85     | 68       | 69              | 78    | 78   |
|                                                          | IN-Drawing | 69.2 | 70     | 68         | 68      | 63      | 56    | 70          | 57   | 69   | 70    | 72          | 84     | 66       | 68              | 79    | 77   |
| Model Soup<br>PRE-FT-EWC-LwF<br>(Wortsman et al., 2022a) | IN-V2      | 68.0 | 68     | 67         | 67      | 65      | 57    | 68          | 60   | 68   | 65    | 71          | 80     | 67       | 67              | 76    | 75   |
|                                                          | IN-A       | 66.9 | 68     | 67         | 67      | 63      | 56    | 67          | 58   | 67   | 62    | 69          | 80     | 66       | 66              | 75    | 74   |
|                                                          | IN-R       | 67.4 | 66     | 66         | 65      | 64      | 59    | 67          | 58   | 66   | 67    | 70          | 79     | 67       | 67              | 75    | 74   |
|                                                          | IN-Sketch  | 65.6 | 66     | 65         | 65      | 62      | 53    | 65          | 56   | 65   | 64    | 68          | 78     | 66       | 64              | 73    | 73   |
|                                                          | ObjNet     | 65.6 | 66     | 64         | 65      | 63      | 52    | 67          | 55   | 65   | 61    | 68          | 79     | 65       | 65              | 74    | 74   |
|                                                          | IN-Cartoon | 69.2 | 70     | 68         | 68      | 65      | 55    | 70          | 59   | 69   | 65    | 71          | 85     | 69       | 69              | 79    | 78   |
|                                                          | IN-Drawing | 69.6 | 70     | 68         | 69      | 64      | 57    | 70          | 58   | 69   | 71    | 72          | 84     | 66       | 69              | 80    | 78   |



Table S23: Accuracy of LAION-2B pretrained ViT-B/16 with different fine-tuning methods and downstream datasets on each ImageNet-C corruption. For each corruption, accuracy is averaged across 5 levels of severity.

| Dataset                                                  | Method     | Avg. | Gauss. | Noise Shot | Impulse | Defocus | Glass | Blur Motion | Zoom | Snow | Frost | Weather Fog | Bright | Contrast | Digital Elastic | Pixel | JPEG |
|----------------------------------------------------------|------------|------|--------|------------|---------|---------|-------|-------------|------|------|-------|-------------|--------|----------|-----------------|-------|------|
| Pretrained                                               |            | 63.0 | 59     | 59         | 59      | 58      | 49    | 64          | 52   | 64   | 61    | 70          | 81     | 70       | 61              | 67    | 71   |
| FT                                                       | IN-V2      | 24.5 | 18     | 17         | 16      | 15      | 18    | 19          | 18   | 19   | 21    | 35          | 45     | 33       | 30              | 31    | 32   |
|                                                          | IN-A       | 8.5  | 8      | 7          | 7       | 5       | 5     | 6           | 6    | 6    | 6     | 12          | 17     | 11       | 11              | 11    | 10   |
|                                                          | IN-R       | 21.4 | 16     | 15         | 14      | 15      | 18    | 18          | 16   | 15   | 20    | 29          | 38     | 31       | 24              | 26    | 25   |
|                                                          | IN-Sketch  | 9.7  | 9      | 8          | 8       | 3       | 4     | 5           | 6    | 9    | 11    | 15          | 21     | 16       | 9               | 8     | 14   |
|                                                          | ObjNet     | 13.5 | 10     | 9          | 8       | 10      | 9     | 13          | 12   | 7    | 9     | 20          | 25     | 22       | 16              | 16    | 17   |
|                                                          | IN-Cartoon | 32.6 | 21     | 20         | 16      | 20      | 21    | 27          | 21   | 29   | 31    | 44          | 67     | 45       | 40              | 46    | 41   |
|                                                          | IN-Drawing | 22.5 | 16     | 13         | 14      | 9       | 13    | 15          | 13   | 25   | 39    | 27          | 56     | 24       | 25              | 27    | 22   |
| Linear Probing                                           | IN-V2      | 62.3 | 59     | 58         | 58      | 55      | 49    | 63          | 52   | 65   | 61    | 70          | 80     | 69       | 61              | 66    | 68   |
|                                                          | IN-A       | 62.7 | 58     | 57         | 58      | 60      | 59    | 65          | 52   | 64   | 61    | 71          | 81     | 70       | 60              | 67    | 68   |
|                                                          | IN-R       | 61.2 | 57     | 56         | 56      | 56      | 51    | 62          | 49   | 61   | 62    | 68          | 79     | 67       | 58              | 68    | 68   |
|                                                          | IN-Sketch  | 60.7 | 57     | 56         | 56      | 55      | 49    | 61          | 51   | 62   | 61    | 68          | 78     | 66       | 58              | 67    | 67   |
|                                                          | ObjNet     | 61.2 | 58     | 57         | 58      | 57      | 45    | 64          | 50   | 62   | 59    | 69          | 80     | 65       | 59              | 65    | 68   |
|                                                          | IN-Cartoon | 59.7 | 53     | 51         | 50      | 55      | 47    | 61          | 48   | 62   | 58    | 69          | 81     | 67       | 58              | 69    | 66   |
|                                                          | IN-Drawing | 57.7 | 54     | 53         | 53      | 49      | 47    | 56          | 43   | 62   | 63    | 65          | 78     | 61       | 58              | 63    | 60   |
| Visual Prompt<br>(Bahng et al., 2022)                    | IN-V2      | 54.4 | 52     | 51         | 51      | 47      | 38    | 55          | 46   | 54   | 51    | 60          | 75     | 59       | 55              | 58    | 63   |
|                                                          | IN-A       | 50.7 | 43     | 42         | 40      | 47      | 33    | 52          | 43   | 50   | 47    | 59          | 74     | 58       | 54              | 56    | 62   |
|                                                          | IN-R       | 49.4 | 46     | 46         | 44      | 44      | 36    | 48          | 40   | 48   | 49    | 54          | 71     | 51       | 52              | 52    | 60   |
|                                                          | IN-Sketch  | 50.9 | 48     | 48         | 46      | 44      | 34    | 50          | 43   | 51   | 50    | 58          | 73     | 55       | 52              | 51    | 60   |
|                                                          | ObjNet     | 42.4 | 36     | 35         | 34      | 37      | 27    | 42          | 35   | 43   | 40    | 50          | 68     | 47       | 47              | 45    | 51   |
|                                                          | IN-Cartoon | 48.7 | 45     | 44         | 43      | 42      | 29    | 47          | 39   | 50   | 45    | 54          | 74     | 55       | 52              | 53    | 59   |
|                                                          | IN-Drawing | 50.2 | 50     | 50         | 49      | 43      | 35    | 47          | 41   | 49   | 52    | 53          | 72     | 52       | 54              | 51    | 57   |
| LoRA<br>(Hu et al., 2021)                                | IN-V2      | 62.0 | 58     | 57         | 58      | 55      | 49    | 63          | 52   | 64   | 61    | 69          | 80     | 69       | 61              | 66    | 67   |
|                                                          | IN-A       | 62.2 | 58     | 57         | 57      | 60      | 49    | 65          | 52   | 63   | 60    | 71          | 81     | 68       | 58              | 66    | 67   |
|                                                          | IN-R       | 61.2 | 56     | 56         | 55      | 56      | 51    | 62          | 49   | 61   | 62    | 69          | 79     | 66       | 58              | 69    | 70   |
|                                                          | IN-Sketch  | 60.9 | 57     | 56         | 56      | 55      | 50    | 61          | 51   | 62   | 62    | 68          | 79     | 64       | 57              | 68    | 69   |
|                                                          | ObjNet     | 59.7 | 57     | 56         | 57      | 57      | 44    | 62          | 49   | 60   | 57    | 68          | 79     | 63       | 56              | 62    | 68   |
|                                                          | IN-Cartoon | 58.4 | 52     | 50         | 49      | 54      | 47    | 60          | 46   | 61   | 57    | 67          | 79     | 65       | 57              | 67    | 65   |
|                                                          | IN-Drawing | 55.8 | 52     | 51         | 51      | 47      | 44    | 54          | 41   | 59   | 61    | 63          | 76     | 61       | 57              | 61    | 59   |
| EWC<br>(Kirkpatrick et al., 2017)                        | IN-V2      | 51.4 | 41     | 40         | 39      | 48      | 42    | 54          | 40   | 47   | 50    | 67          | 74     | 64       | 52              | 56    | 56   |
|                                                          | IN-A       | 39.9 | 27     | 26         | 26      | 42      | 30    | 45          | 31   | 29   | 34    | 62          | 61     | 60       | 40              | 43    | 43   |
|                                                          | IN-R       | 58.7 | 51     | 50         | 49      | 54      | 52    | 59          | 47   | 58   | 60    | 67          | 77     | 66       | 58              | 66    | 66   |
|                                                          | IN-Sketch  | 41.7 | 39     | 37         | 37      | 28      | 25    | 36          | 27   | 51   | 51    | 64          | 55     | 48       | 37              | 41    | 48   |
|                                                          | ObjNet     | 48.0 | 36     | 33         | 34      | 49      | 39    | 54          | 40   | 40   | 44    | 62          | 72     | 62       | 48              | 53    | 55   |
|                                                          | IN-Cartoon | 52.6 | 45     | 43         | 42      | 47      | 37    | 53          | 38   | 55   | 49    | 63          | 76     | 65       | 52              | 60    | 64   |
|                                                          | IN-Drawing | 50.4 | 45     | 43         | 44      | 41      | 41    | 47          | 37   | 54   | 60    | 57          | 74     | 57       | 52              | 52    | 54   |
| LwF<br>(Li & Hoiem, 2017)                                | IN-V2      | 28.0 | 21     | 19         | 18      | 18      | 21    | 24          | 21   | 22   | 24    | 40          | 50     | 38       | 34              | 34    | 36   |
|                                                          | IN-A       | 13.6 | 12     | 11         | 10      | 8       | 9     | 10          | 9    | 10   | 11    | 19          | 26     | 18       | 17              | 17    | 17   |
|                                                          | IN-R       | 26.9 | 21     | 20         | 18      | 21      | 22    | 24          | 20   | 20   | 26    | 35          | 48     | 37       | 30              | 31    | 31   |
|                                                          | IN-Sketch  | 11.5 | 10     | 10         | 9       | 4       | 5     | 6           | 6    | 11   | 14    | 18          | 24     | 17       | 11              | 9     | 17   |
|                                                          | ObjNet     | 19.2 | 14     | 12         | 12      | 17      | 14    | 19          | 17   | 10   | 12    | 27          | 35     | 29       | 22              | 25    | 24   |
|                                                          | IN-Cartoon | 42.0 | 29     | 27         | 22      | 27      | 30    | 35          | 28   | 41   | 44    | 55          | 78     | 53       | 52              | 57    | 53   |
|                                                          | IN-Drawing | 28.8 | 23     | 19         | 21      | 13      | 18    | 20          | 17   | 33   | 47    | 33          | 65     | 28       | 32              | 35    | 30   |
| LP-FT<br>(Kumar et al., 2022)                            | IN-V2      | 24.3 | 18     | 16         | 15      | 13      | 17    | 18          | 17   | 20   | 22    | 35          | 46     | 33       | 31              | 31    | 32   |
|                                                          | IN-A       | 11.4 | 10     | 9          | 9       | 7       | 7     | 8           | 8    | 8    | 9     | 16          | 22     | 15       | 14              | 14    | 14   |
|                                                          | IN-R       | 22.5 | 17     | 16         | 14      | 17      | 19    | 20          | 17   | 15   | 22    | 30          | 40     | 32       | 25              | 27    | 26   |
|                                                          | IN-Sketch  | 10.5 | 10     | 9          | 8       | 4       | 5     | 6           | 6    | 9    | 12    | 17          | 22     | 16       | 10              | 9     | 16   |
|                                                          | ObjNet     | 15.4 | 11     | 9          | 9       | 12      | 12    | 15          | 13   | 8    | 10    | 21          | 29     | 23       | 18              | 21    | 20   |
|                                                          | IN-Cartoon | 32.3 | 22     | 21         | 16      | 17      | 21    | 25          | 20   | 30   | 34    | 43          | 69     | 44       | 40              | 45    | 39   |
|                                                          | IN-Drawing | 24.4 | 18     | 15         | 16      | 10      | 15    | 16          | 14   | 25   | 41    | 29          | 59     | 26       | 28              | 31    | 24   |
| WiSE-FT<br>(Wortsman et al., 2022b)                      | IN-V2      | 43.7 | 36     | 34         | 34      | 38      | 33    | 44          | 35   | 36   | 39    | 61          | 67     | 60       | 45              | 47    | 49   |
|                                                          | IN-A       | 26.7 | 21     | 20         | 20      | 19      | 14    | 25          | 20   | 19   | 21    | 45          | 46     | 45       | 27              | 27    | 29   |
|                                                          | IN-R       | 43.3 | 35     | 33         | 32      | 39      | 35    | 43          | 33   | 37   | 42    | 57          | 66     | 59       | 44              | 47    | 47   |
|                                                          | IN-Sketch  | 25.4 | 23     | 22         | 21      | 14      | 12    | 19          | 16   | 24   | 30    | 45          | 45     | 38       | 23              | 20    | 31   |
|                                                          | ObjNet     | 42.3 | 32     | 30         | 30      | 41      | 31    | 45          | 36   | 30   | 34    | 59          | 65     | 59       | 44              | 48    | 50   |
|                                                          | IN-Cartoon | 53.0 | 44     | 42         | 41      | 44      | 38    | 49          | 35   | 56   | 52    | 66          | 80     | 65       | 57              | 62    | 64   |
|                                                          | IN-Drawing | 45.9 | 40     | 35         | 38      | 31      | 34    | 39          | 30   | 52   | 60    | 56          | 77     | 49       | 47              | 50    | 51   |
| Model Soup<br>PRE-FT-EWC-LwF<br>(Wortsman et al., 2022a) | IN-V2      | 46.2 | 40     | 37         | 38      | 37      | 35    | 45          | 35   | 42   | 42    | 62          | 69     | 60       | 48              | 50    | 53   |
|                                                          | IN-A       | 35.0 | 27     | 25         | 25      | 29      | 22    | 36          | 27   | 27   | 29    | 55          | 57     | 55       | 36              | 35    | 39   |
|                                                          | IN-R       | 47.8 | 40     | 38         | 37      | 42      | 41    | 48          | 36   | 43   | 48    | 61          | 70     | 61       | 48              | 52    | 53   |
|                                                          | IN-Sketch  | 27.5 | 25     | 24         | 24      | 15      | 13    | 20          | 17   | 27   | 32    | 47          | 46     | 40       | 25              | 23    | 34   |
|                                                          | ObjNet     | 45.0 | 36     | 34         | 34      | 43      | 34    | 47          | 37   | 36   | 38    | 59          | 68     | 59       | 46              | 51    | 54   |
|                                                          | IN-Cartoon | 54.5 | 47     | 45         | 44      | 44      | 39    | 50          | 35   | 59   | 55    | 66          | 81     | 65       | 59              | 62    | 66   |
|                                                          | IN-Drawing | 47.0 | 42     | 37         | 41      | 32      | 35    | 39          | 30   | 54   | 62    | 56          | 77     | 48       | 48              | 50    | 53   |

Table S24: Accuracy of OpenAI CLIP ViT-B/16 with different fine-tuning methods and downstream datasets on each ImageNet-C corruption. For each corruption, accuracy is averaged across 5 levels of severity.

| Dataset                                                  | Method     | Avg. | Gauss. | Noise Shot | Impulse | Defocus | Glass | Blur Motion | Zoom | Snow | Frost | Weather Fog | Bright | Contrast | Digital Elastic | Pixel | JPEG |
|----------------------------------------------------------|------------|------|--------|------------|---------|---------|-------|-------------|------|------|-------|-------------|--------|----------|-----------------|-------|------|
| Pretrained                                               |            | 62.6 | 58     | 58         | 58      | 57      | 46    | 63          | 54   | 63   | 59    | 69          | 80     | 70       | 62              | 71    | 70   |
| FT                                                       | IN-V2      | 25.7 | 18     | 17         | 16      | 15      | 21    | 21          | 19   | 20   | 23    | 36          | 45     | 33       | 34              | 33    | 36   |
|                                                          | IN-A       | 8.9  | 7      | 7          | 5       | 5       | 6     | 6           | 6    | 7    | 7     | 13          | 17     | 12       | 11              | 12    | 12   |
|                                                          | IN-R       | 22.2 | 17     | 16         | 15      | 16      | 18    | 19          | 16   | 16   | 22    | 28          | 38     | 29       | 26              | 28    | 28   |
|                                                          | IN-Sketch  | 7.2  | 7      | 7          | 6       | 2       | 3     | 4           | 4    | 7    | 9     | 11          | 14     | 10       | 7               | 7     | 12   |
|                                                          | ObjNet     | 10.6 | 7      | 7          | 6       | 7       | 7     | 9           | 9    | 5    | 7     | 17          | 20     | 17       | 13              | 14    | 14   |
|                                                          | IN-Cartoon | 32.8 | 20     | 19         | 15      | 20      | 24    | 27          | 22   | 29   | 32    | 41          | 64     | 42       | 43              | 48    | 43   |
|                                                          | IN-Drawing | 23.0 | 18     | 14         | 15      | 8       | 13    | 14          | 13   | 24   | 39    | 25          | 56     | 23       | 27              | 30    | 26   |
| Linear Probing                                           | IN-V2      | 61.6 | 57     | 55         | 56      | 57      | 47    | 64          | 54   | 61   | 59    | 70          | 79     | 69       | 60              | 69    | 68   |
|                                                          | IN-A       | 62.3 | 57     | 56         | 56      | 59      | 47    | 65          | 54   | 62   | 59    | 71          | 80     | 69       | 60              | 70    | 68   |
|                                                          | IN-R       | 59.9 | 56     | 55         | 54      | 55      | 49    | 61          | 50   | 58   | 59    | 67          | 77     | 65       | 58              | 68    | 69   |
|                                                          | IN-Sketch  | 58.0 | 54     | 53         | 53      | 53      | 45    | 58          | 48   | 56   | 56    | 66          | 76     | 63       | 56              | 67    | 66   |
|                                                          | ObjNet     | 60.1 | 56     | 55         | 55      | 57      | 43    | 63          | 51   | 61   | 57    | 69          | 78     | 64       | 59              | 65    | 66   |
|                                                          | IN-Cartoon | 56.3 | 53     | 51         | 50      | 50      | 39    | 56          | 44   | 56   | 53    | 65          | 79     | 63       | 57              | 67    | 63   |
|                                                          | IN-Drawing | 54.7 | 50     | 50         | 50      | 47      | 43    | 53          | 41   | 53   | 59    | 62          | 75     | 58       | 56              | 64    | 58   |
| Visual Prompt<br>(Bahng et al., 2022)                    | IN-V2      | 53.6 | 51     | 51         | 50      | 47      | 35    | 53          | 47   | 52   | 49    | 59          | 74     | 58       | 54              | 61    | 62   |
|                                                          | IN-A       | 50.5 | 44     | 43         | 42      | 44      | 32    | 51          | 45   | 50   | 45    | 59          | 73     | 58       | 53              | 59    | 59   |
|                                                          | IN-R       | 47.9 | 45     | 44         | 43      | 41      | 30    | 46          | 39   | 47   | 48    | 53          | 71     | 48       | 50              | 55    | 59   |
|                                                          | IN-Sketch  | 50.8 | 49     | 47         | 46      | 44      | 34    | 49          | 44   | 48   | 49    | 56          | 73     | 53       | 53              | 56    | 60   |
|                                                          | ObjNet     | 41.1 | 36     | 34         | 32      | 36      | 25    | 41          | 36   | 41   | 37    | 47          | 66     | 45       | 45              | 46    | 50   |
|                                                          | IN-Cartoon | 46.2 | 43     | 42         | 40      | 39      | 28    | 45          | 40   | 43   | 40    | 50          | 71     | 48       | 50              | 57    | 57   |
|                                                          | IN-Drawing | 46.8 | 48     | 48         | 47      | 38      | 35    | 41          | 38   | 44   | 49    | 44          | 69     | 42       | 50              | 54    | 55   |
| LoRA<br>(Hu et al., 2021)                                | IN-V2      | 61.5 | 57     | 55         | 56      | 57      | 46    | 64          | 54   | 61   | 58    | 70          | 79     | 69       | 60              | 69    | 68   |
|                                                          | IN-A       | 62.0 | 57     | 56         | 56      | 59      | 46    | 64          | 54   | 62   | 59    | 71          | 80     | 68       | 60              | 70    | 68   |
|                                                          | IN-R       | 59.5 | 56     | 55         | 54      | 55      | 48    | 60          | 49   | 56   | 58    | 67          | 77     | 64       | 57              | 68    | 69   |
|                                                          | IN-Sketch  | 58.6 | 54     | 53         | 53      | 53      | 45    | 58          | 48   | 57   | 58    | 68          | 77     | 63       | 57              | 68    | 67   |
|                                                          | ObjNet     | 57.9 | 55     | 55         | 54      | 55      | 41    | 61          | 49   | 58   | 54    | 67          | 77     | 61       | 56              | 62    | 64   |
|                                                          | IN-Cartoon | 54.6 | 51     | 49         | 49      | 48      | 37    | 54          | 42   | 54   | 52    | 63          | 77     | 61       | 55              | 64    | 61   |
|                                                          | IN-Drawing | 52.5 | 48     | 47         | 48      | 46      | 40    | 51          | 39   | 50   | 56    | 60          | 73     | 57       | 53              | 62    | 56   |
| EWC<br>(Kirkpatrick et al., 2017)                        | IN-V2      | 52.9 | 43     | 41         | 42      | 49      | 41    | 55          | 41   | 50   | 50    | 67          | 74     | 64       | 53              | 62    | 62   |
|                                                          | IN-A       | 45.3 | 33     | 31         | 32      | 44      | 36    | 48          | 35   | 39   | 41    | 61          | 65     | 57       | 46              | 56    | 56   |
|                                                          | IN-R       | 58.0 | 53     | 52         | 52      | 52      | 49    | 57          | 46   | 56   | 57    | 66          | 75     | 64       | 57              | 66    | 67   |
|                                                          | IN-Sketch  | 32.8 | 31     | 30         | 30      | 20      | 17    | 25          | 19   | 44   | 44    | 58          | 37     | 38       | 28              | 33    | 38   |
|                                                          | ObjNet     | 46.6 | 37     | 35         | 35      | 45      | 36    | 50          | 38   | 40   | 40    | 59          | 69     | 58       | 48              | 55    | 56   |
|                                                          | IN-Cartoon | 49.4 | 43     | 41         | 41      | 43      | 33    | 48          | 36   | 51   | 45    | 59          | 73     | 60       | 50              | 60    | 58   |
|                                                          | IN-Drawing | 49.0 | 46     | 42         | 45      | 38      | 36    | 44          | 35   | 51   | 57    | 58          | 73     | 55       | 48              | 56    | 52   |
| LwF<br>(Li & Hoiem, 2017)                                | IN-V2      | 28.8 | 19     | 17         | 14      | 19      | 24    | 25          | 22   | 23   | 27    | 41          | 50     | 37       | 38              | 38    | 40   |
|                                                          | IN-A       | 14.7 | 12     | 11         | 10      | 9       | 11    | 12          | 11   | 9    | 11    | 21          | 26     | 20       | 20              | 19    | 20   |
|                                                          | IN-R       | 27.7 | 21     | 20         | 17      | 20      | 23    | 24          | 21   | 22   | 28    | 35          | 47     | 34       | 33              | 35    | 35   |
|                                                          | IN-Sketch  | 8.8  | 8      | 8          | 7       | 3       | 3     | 4           | 4    | 8    | 12    | 14          | 16     | 12       | 8               | 8     | 14   |
|                                                          | ObjNet     | 18.6 | 12     | 11         | 10      | 14      | 14    | 19          | 17   | 9    | 12    | 27          | 34     | 25       | 24              | 24    | 26   |
|                                                          | IN-Cartoon | 41.4 | 30     | 29         | 24      | 25      | 31    | 35          | 29   | 38   | 42    | 50          | 75     | 48       | 54              | 58    | 54   |
|                                                          | IN-Drawing | 30.3 | 23     | 19         | 19      | 15      | 20    | 22          | 20   | 32   | 45    | 34          | 66     | 28       | 35              | 41    | 36   |
| LP-FT<br>(Kumar et al., 2022)                            | IN-V2      | 25.8 | 19     | 17         | 16      | 15      | 20    | 21          | 18   | 21   | 23    | 37          | 46     | 33       | 33              | 33    | 36   |
|                                                          | IN-A       | 10.4 | 8      | 7          | 7       | 7       | 8     | 8           | 8    | 7    | 7     | 15          | 19     | 14       | 13              | 14    | 13   |
|                                                          | IN-R       | 23.3 | 18     | 17         | 15      | 17      | 19    | 20          | 16   | 18   | 24    | 30          | 40     | 30       | 27              | 29    | 29   |
|                                                          | IN-Sketch  | 7.3  | 7      | 7          | 6       | 2       | 3     | 4           | 4    | 7    | 10    | 11          | 14     | 10       | 7               | 7     | 12   |
|                                                          | ObjNet     | 12.7 | 9      | 8          | 7       | 9       | 9     | 11          | 11   | 7    | 9     | 19          | 24     | 19       | 16              | 17    | 16   |
|                                                          | IN-Cartoon | 30.6 | 20     | 19         | 15      | 17      | 21    | 24          | 20   | 25   | 28    | 39          | 63     | 40       | 41              | 45    | 40   |
|                                                          | IN-Drawing | 27.7 | 21     | 18         | 17      | 13      | 18    | 20          | 18   | 25   | 41    | 33          | 59     | 29       | 35              | 38    | 30   |
| WiSE-FT<br>(Wortsman et al., 2022b)                      | IN-V2      | 47.9 | 39     | 37         | 38      | 40      | 39    | 47          | 36   | 42   | 42    | 61          | 69     | 59       | 53              | 56    | 59   |
|                                                          | IN-A       | 39.1 | 30     | 28         | 29      | 34      | 30    | 38          | 28   | 31   | 32    | 54          | 59     | 51       | 44              | 48    | 50   |
|                                                          | IN-R       | 48.5 | 41     | 40         | 39      | 41      | 40    | 46          | 34   | 45   | 48    | 60          | 70     | 59       | 52              | 55    | 56   |
|                                                          | IN-Sketch  | 25.5 | 24     | 23         | 23      | 13      | 12    | 17          | 13   | 28   | 33    | 44          | 39     | 33       | 24              | 22    | 33   |
|                                                          | ObjNet     | 41.7 | 33     | 31         | 30      | 38      | 30    | 42          | 35   | 30   | 33    | 56          | 65     | 55       | 46              | 50    | 52   |
|                                                          | IN-Cartoon | 52.4 | 43     | 42         | 41      | 43      | 40    | 47          | 36   | 54   | 50    | 63          | 78     | 62       | 58              | 65    | 64   |
|                                                          | IN-Drawing | 47.4 | 42     | 37         | 41      | 30      | 34    | 39          | 31   | 54   | 59    | 58          | 76     | 49       | 50              | 56    | 55   |
| Model Soup<br>PRE-FT-EWC-LwF<br>(Wortsman et al., 2022a) | IN-V2      | 48.7 | 41     | 39         | 40      | 38      | 38    | 46          | 35   | 46   | 43    | 61          | 70     | 59       | 54              | 58    | 60   |
|                                                          | IN-A       | 39.8 | 33     | 30         | 31      | 33      | 30    | 38          | 27   | 31   | 31    | 55          | 60     | 52       | 45              | 48    | 52   |
|                                                          | IN-R       | 50.4 | 45     | 43         | 43      | 42      | 42    | 48          | 37   | 48   | 49    | 60          | 71     | 59       | 54              | 57    | 58   |
|                                                          | IN-Sketch  | 26.3 | 25     | 24         | 24      | 14      | 13    | 17          | 14   | 30   | 35    | 45          | 38     | 33       | 25              | 24    | 34   |
|                                                          | ObjNet     | 44.2 | 37     | 35         | 34      | 39      | 32    | 44          | 36   | 35   | 35    | 57          | 67     | 56       | 49              | 53    | 55   |
|                                                          | IN-Cartoon | 53.8 | 47     | 45         | 45      | 42      | 40    | 48          | 37   | 57   | 52    | 64          | 78     | 62       | 59              | 66    | 65   |
|                                                          | IN-Drawing | 48.6 | 44     | 39         | 43      | 31      | 36    | 39          | 33   | 56   | 60    | 59          | 77     | 49       | 51              | 57    | 55   |

Table S25: Accuracy of ImageNet-1K with AugReg pretrained ViT-B/32 with different fine-tuning methods and downstream datasets on each ImageNet-C corruption. For each corruption, accuracy is averaged across 5 levels of severity.

| Dataset                                                  | Method     | Avg. | Gauss. | Noise Shot | Impulse | Defocus | Glass | Blur Motion | Zoom | Snow | Frost | Weather Fog | Bright | Contrast | Digital Elastic | Pixel | JPEG |
|----------------------------------------------------------|------------|------|--------|------------|---------|---------|-------|-------------|------|------|-------|-------------|--------|----------|-----------------|-------|------|
| Pretrained                                               |            | 53.5 | 55     | 54         | 54      | 46      | 43    | 49          | 41   | 43   | 53    | 54          | 69     | 52       | 57              | 67    | 64   |
| FT                                                       | IN-V2      | 53.4 | 53     | 51         | 51      | 48      | 43    | 50          | 39   | 47   | 55    | 56          | 70     | 54       | 57              | 66    | 64   |
|                                                          | IN-A       | 47.5 | 48     | 46         | 46      | 45      | 38    | 46          | 32   | 40   | 48    | 48          | 62     | 49       | 48              | 58    | 58   |
|                                                          | IN-R       | 47.0 | 47     | 46         | 45      | 42      | 43    | 44          | 31   | 42   | 50    | 46          | 61     | 44       | 49              | 57    | 57   |
|                                                          | IN-Sketch  | 51.1 | 53     | 52         | 51      | 45      | 41    | 45          | 39   | 45   | 52    | 51          | 65     | 50       | 53              | 63    | 61   |
|                                                          | ObjNet     | 47.8 | 47     | 46         | 46      | 44      | 39    | 45          | 33   | 40   | 49    | 49          | 64     | 44       | 50              | 61    | 59   |
|                                                          | IN-Cartoon | 50.1 | 52     | 50         | 50      | 42      | 36    | 46          | 33   | 42   | 50    | 50          | 72     | 48       | 53              | 68    | 61   |
|                                                          | IN-Drawing | 52.8 | 57     | 55         | 55      | 42      | 44    | 48          | 37   | 45   | 58    | 52          | 70     | 47       | 56              | 65    | 63   |
| Linear Probing                                           | IN-V2      | 53.5 | 55     | 53         | 54      | 46      | 43    | 49          | 41   | 43   | 53    | 54          | 69     | 53       | 57              | 66    | 64   |
|                                                          | IN-A       | 53.2 | 54     | 53         | 53      | 47      | 45    | 50          | 41   | 43   | 53    | 52          | 69     | 48       | 58              | 66    | 64   |
|                                                          | IN-R       | 52.8 | 55     | 53         | 54      | 47      | 45    | 49          | 42   | 43   | 53    | 50          | 69     | 44       | 58              | 66    | 65   |
|                                                          | IN-Sketch  | 51.0 | 54     | 52         | 53      | 44      | 41    | 46          | 40   | 41   | 51    | 48          | 67     | 47       | 55              | 64    | 62   |
|                                                          | ObjNet     | 53.3 | 55     | 53         | 54      | 48      | 46    | 51          | 42   | 43   | 53    | 51          | 70     | 45       | 58              | 67    | 65   |
|                                                          | IN-Cartoon | 54.2 | 57     | 55         | 55      | 46      | 44    | 49          | 42   | 43   | 54    | 53          | 72     | 49       | 59              | 68    | 67   |
|                                                          | IN-Drawing | 54.4 | 57     | 55         | 56      | 47      | 47    | 50          | 42   | 46   | 57    | 52          | 71     | 45       | 59              | 67    | 67   |
| Visual Prompt<br>(Bahng et al., 2022)                    | IN-V2      | 45.5 | 46     | 44         | 44      | 39      | 36    | 41          | 37   | 37   | 44    | 43          | 63     | 41       | 53              | 58    | 56   |
|                                                          | IN-A       | 29.9 | 28     | 26         | 25      | 22      | 19    | 26          | 21   | 23   | 29    | 32          | 48     | 31       | 37              | 40    | 43   |
|                                                          | IN-R       | 39.4 | 40     | 39         | 38      | 33      | 30    | 35          | 29   | 33   | 40    | 36          | 55     | 38       | 44              | 50    | 51   |
|                                                          | IN-Sketch  | 43.1 | 46     | 45         | 44      | 35      | 31    | 37          | 32   | 37   | 43    | 39          | 59     | 40       | 47              | 54    | 57   |
|                                                          | ObjNet     | 33.1 | 29     | 27         | 26      | 26      | 23    | 28          | 24   | 25   | 33    | 37          | 51     | 37       | 41              | 44    | 44   |
|                                                          | IN-Cartoon | 42.4 | 47     | 46         | 46      | 34      | 30    | 36          | 31   | 32   | 39    | 34          | 63     | 36       | 49              | 57    | 56   |
|                                                          | IN-Drawing | 42.3 | 46     | 44         | 44      | 32      | 32    | 35          | 30   | 35   | 47    | 36          | 60     | 36       | 47              | 54    | 53   |
| LoRA<br>(Hu et al., 2021)                                | IN-V2      | 53.9 | 55     | 54         | 54      | 47      | 44    | 49          | 42   | 43   | 53    | 55          | 70     | 54       | 58              | 67    | 64   |
|                                                          | IN-A       | 53.4 | 55     | 54         | 54      | 48      | 47    | 51          | 42   | 44   | 54    | 48          | 70     | 54       | 59              | 67    | 66   |
|                                                          | IN-R       | 50.6 | 54     | 53         | 53      | 44      | 44    | 47          | 40   | 41   | 51    | 40          | 69     | 37       | 57              | 65    | 65   |
|                                                          | IN-Sketch  | 51.6 | 55     | 53         | 54      | 45      | 43    | 47          | 41   | 41   | 51    | 46          | 69     | 44       | 56              | 66    | 64   |
|                                                          | ObjNet     | 53.4 | 55     | 54         | 54      | 48      | 47    | 51          | 42   | 44   | 54    | 49          | 70     | 43       | 59              | 67    | 65   |
|                                                          | IN-Cartoon | 52.6 | 55     | 54         | 54      | 46      | 44    | 48          | 42   | 42   | 52    | 51          | 69     | 46       | 57              | 66    | 64   |
|                                                          | IN-Drawing | 52.1 | 56     | 55         | 55      | 43      | 45    | 47          | 40   | 44   | 56    | 43          | 70     | 38       | 58              | 66    | 65   |
| EWC<br>(Kirkpatrick et al., 2017)                        | IN-V2      | 55.3 | 55     | 54         | 54      | 49      | 45    | 52          | 43   | 46   | 55    | 57          | 71     | 55       | 60              | 68    | 66   |
|                                                          | IN-A       | 49.9 | 50     | 48         | 49      | 45      | 41    | 48          | 35   | 42   | 50    | 49          | 65     | 50       | 52              | 61    | 61   |
|                                                          | IN-R       | 52.5 | 54     | 52         | 52      | 47      | 46    | 50          | 39   | 46   | 54    | 51          | 68     | 47       | 55              | 64    | 64   |
|                                                          | IN-Sketch  | 53.8 | 55     | 54         | 54      | 47      | 44    | 49          | 40   | 46   | 54    | 54          | 69     | 52       | 57              | 66    | 65   |
|                                                          | ObjNet     | 54.0 | 55     | 53         | 53      | 50      | 45    | 50          | 40   | 44   | 54    | 55          | 70     | 53       | 57              | 66    | 65   |
|                                                          | IN-Cartoon | 52.8 | 55     | 53         | 53      | 46      | 42    | 48          | 40   | 43   | 52    | 54          | 70     | 51       | 56              | 66    | 64   |
|                                                          | IN-Drawing | 55.1 | 56     | 54         | 54      | 48      | 46    | 51          | 40   | 48   | 59    | 55          | 70     | 54       | 58              | 67    | 65   |
| LwF<br>(Li & Hoiem, 2017)                                | IN-V2      | 54.0 | 54     | 52         | 52      | 48      | 43    | 50          | 40   | 46   | 55    | 56          | 70     | 55       | 57              | 66    | 65   |
|                                                          | IN-A       | 52.0 | 52     | 50         | 50      | 48      | 42    | 49          | 38   | 45   | 53    | 53          | 67     | 53       | 53              | 63    | 63   |
|                                                          | IN-R       | 53.0 | 53     | 52         | 51      | 48      | 48    | 50          | 38   | 47   | 55    | 53          | 67     | 51       | 56              | 64    | 63   |
|                                                          | IN-Sketch  | 52.5 | 54     | 53         | 53      | 46      | 42    | 47          | 40   | 46   | 54    | 53          | 67     | 51       | 55              | 64    | 62   |
|                                                          | ObjNet     | 52.1 | 52     | 50         | 50      | 48      | 42    | 49          | 39   | 43   | 52    | 53          | 68     | 51       | 55              | 65    | 63   |
|                                                          | IN-Cartoon | 54.1 | 55     | 53         | 53      | 46      | 42    | 50          | 39   | 45   | 54    | 54          | 74     | 53       | 58              | 70    | 65   |
|                                                          | IN-Drawing | 55.2 | 58     | 56         | 56      | 45      | 46    | 51          | 40   | 47   | 59    | 54          | 73     | 50       | 58              | 68    | 65   |
| LP-FT<br>(Kumar et al., 2022)                            | IN-V2      | 53.7 | 53     | 51         | 52      | 48      | 43    | 50          | 40   | 46   | 55    | 56          | 70     | 55       | 57              | 66    | 65   |
|                                                          | IN-A       | 52.2 | 52     | 51         | 51      | 48      | 42    | 50          | 38   | 45   | 53    | 52          | 68     | 52       | 54              | 64    | 62   |
|                                                          | IN-R       | 51.4 | 52     | 51         | 50      | 46      | 47    | 49          | 36   | 45   | 54    | 50          | 66     | 47       | 55              | 63    | 61   |
|                                                          | IN-Sketch  | 51.1 | 53     | 52         | 52      | 44      | 41    | 45          | 40   | 45   | 53    | 49          | 66     | 50       | 53              | 63    | 61   |
|                                                          | ObjNet     | 51.3 | 51     | 49         | 49      | 47      | 42    | 49          | 38   | 43   | 53    | 51          | 68     | 48       | 55              | 64    | 63   |
|                                                          | IN-Cartoon | 52.6 | 54     | 52         | 52      | 44      | 39    | 48          | 36   | 44   | 52    | 53          | 74     | 51       | 56              | 70    | 64   |
|                                                          | IN-Drawing | 53.6 | 58     | 56         | 57      | 42      | 45    | 48          | 37   | 48   | 60    | 50          | 72     | 44       | 57              | 66    | 65   |
| WiSE-FT<br>(Wortsman et al., 2022b)                      | IN-V2      | 54.7 | 55     | 53         | 53      | 48      | 44    | 50          | 41   | 46   | 55    | 57          | 70     | 56       | 58              | 67    | 65   |
|                                                          | IN-A       | 54.3 | 54     | 52         | 53      | 49      | 44    | 51          | 40   | 46   | 55    | 56          | 70     | 56       | 57              | 66    | 65   |
|                                                          | IN-R       | 55.4 | 55     | 54         | 54      | 50      | 48    | 52          | 41   | 48   | 57    | 57          | 70     | 55       | 58              | 67    | 65   |
|                                                          | IN-Sketch  | 54.4 | 56     | 55         | 55      | 48      | 44    | 49          | 42   | 47   | 55    | 55          | 69     | 55       | 57              | 66    | 64   |
|                                                          | ObjNet     | 54.3 | 54     | 53         | 53      | 48      | 44    | 51          | 41   | 45   | 54    | 56          | 70     | 54       | 58              | 67    | 65   |
|                                                          | IN-Cartoon | 54.2 | 55     | 53         | 54      | 47      | 42    | 50          | 40   | 45   | 53    | 55          | 72     | 55       | 58              | 69    | 65   |
|                                                          | IN-Drawing | 56.9 | 58     | 57         | 57      | 48      | 47    | 53          | 42   | 49   | 60    | 58          | 73     | 55       | 60              | 69    | 67   |
| Model Soup<br>PRE-FT-EWC-LwF<br>(Wortsman et al., 2022a) | IN-V2      | 54.9 | 55     | 53         | 54      | 49      | 44    | 51          | 41   | 46   | 55    | 57          | 71     | 55       | 59              | 67    | 65   |
|                                                          | IN-A       | 53.6 | 53     | 52         | 52      | 49      | 43    | 51          | 39   | 45   | 54    | 55          | 69     | 55       | 56              | 65    | 64   |
|                                                          | IN-R       | 55.3 | 55     | 54         | 54      | 50      | 48    | 52          | 41   | 48   | 57    | 56          | 70     | 55       | 58              | 67    | 65   |
|                                                          | IN-Sketch  | 54.4 | 56     | 55         | 55      | 48      | 44    | 49          | 42   | 47   | 55    | 55          | 69     | 54       | 57              | 66    | 64   |
|                                                          | ObjNet     | 54.3 | 54     | 53         | 53      | 49      | 44    | 51          | 41   | 45   | 54    | 56          | 70     | 54       | 58              | 67    | 65   |
|                                                          | IN-Cartoon | 54.3 | 55     | 53         | 54      | 47      | 42    | 50          | 40   | 45   | 54    | 55          | 73     | 54       | 58              | 69    | 65   |
|                                                          | IN-Drawing | 56.9 | 59     | 57         | 57      | 49      | 47    | 53          | 42   | 49   | 60    | 57          | 73     | 55       | 60              | 69    | 67   |

Table S26: Accuracy of ImageNet-1K with SAM pretrained ViT-B/32 with different fine-tuning methods and downstream datasets on each ImageNet-C corruption. For each corruption, accuracy is averaged across 5 levels of severity.

| Dataset                                            | Method     | Avg. | Gauss. | Noise Shot | Impulse | Defocus | Glass | Blur Motion | Zoom | Snow | Frost | Weather Fog | Bright | Contrast | Digital Elastic | Pixel | JPEG |
|----------------------------------------------------|------------|------|--------|------------|---------|---------|-------|-------------|------|------|-------|-------------|--------|----------|-----------------|-------|------|
| Pretrained                                         |            | 48.8 | 49     | 48         | 47      | 45      | 47    | 46          | 41   | 35   | 45    | 36          | 65     | 35       | 59              | 68    | 65   |
| FT                                                 | IN-V2      | 51.1 | 48     | 46         | 45      | 50      | 48    | 50          | 42   | 41   | 47    | 45          | 68     | 41       | 61              | 67    | 67   |
|                                                    | IN-A       | 43.1 | 36     | 35         | 33      | 50      | 42    | 45          | 32   | 36   | 38    | 34          | 59     | 35       | 53              | 59    | 59   |
|                                                    | IN-R       | 49.2 | 49     | 49         | 48      | 49      | 47    | 46          | 34   | 42   | 48    | 44          | 62     | 44       | 55              | 61    | 62   |
|                                                    | IN-Sketch  | 50.1 | 49     | 48         | 47      | 48      | 46    | 47          | 42   | 41   | 46    | 46          | 64     | 42       | 57              | 65    | 64   |
|                                                    | ObjNet     | 44.7 | 38     | 38         | 35      | 49      | 43    | 46          | 36   | 36   | 40    | 35          | 61     | 34       | 56              | 62    | 61   |
|                                                    | IN-Cartoon | 47.3 | 44     | 43         | 40      | 46      | 41    | 46          | 38   | 37   | 41    | 40          | 67     | 42       | 55              | 66    | 65   |
|                                                    | IN-Drawing | 49.3 | 55     | 53         | 53      | 41      | 45    | 43          | 35   | 40   | 53    | 37          | 65     | 37       | 55              | 65    | 63   |
| Linear Probing                                     | IN-V2      | 48.8 | 49     | 47         | 46      | 45      | 47    | 46          | 41   | 35   | 45    | 36          | 65     | 36       | 60              | 68    | 65   |
|                                                    | IN-A       | 49.0 | 48     | 47         | 46      | 46      | 48    | 47          | 40   | 36   | 46    | 37          | 65     | 35       | 60              | 68    | 66   |
|                                                    | IN-R       | 49.2 | 49     | 48         | 47      | 47      | 48    | 47          | 41   | 36   | 46    | 36          | 66     | 35       | 60              | 67    | 66   |
|                                                    | IN-Sketch  | 48.5 | 49     | 47         | 47      | 47      | 47    | 47          | 41   | 37   | 46    | 33          | 65     | 33       | 59              | 66    | 65   |
|                                                    | ObjNet     | 49.2 | 49     | 47         | 46      | 48      | 48    | 47          | 41   | 36   | 46    | 36          | 65     | 34       | 60              | 67    | 66   |
|                                                    | IN-Cartoon | 48.2 | 49     | 47         | 47      | 44      | 46    | 46          | 40   | 35   | 45    | 33          | 66     | 33       | 59              | 68    | 65   |
|                                                    | IN-Drawing | 49.0 | 52     | 50         | 50      | 43      | 47    | 44          | 39   | 37   | 48    | 36          | 65     | 36       | 59              | 67    | 64   |
| Visual Prompt (Bahng et al., 2022)                 | IN-V2      | 41.5 | 43     | 42         | 41      | 35      | 36    | 36          | 35   | 31   | 38    | 25          | 59     | 25       | 54              | 60    | 61   |
|                                                    | IN-A       | 19.2 | 21     | 20         | 18      | 8       | 13    | 11          | 12   | 13   | 18    | 6           | 37     | 6        | 32              | 33    | 38   |
|                                                    | IN-R       | 34.3 | 39     | 38         | 37      | 25      | 27    | 26          | 24   | 25   | 31    | 19          | 54     | 19       | 45              | 50    | 54   |
|                                                    | IN-Sketch  | 34.2 | 36     | 36         | 35      | 27      | 28    | 27          | 26   | 26   | 32    | 19          | 54     | 18       | 45              | 52    | 54   |
|                                                    | ObjNet     | 27.4 | 26     | 26         | 24      | 22      | 23    | 22          | 22   | 18   | 24    | 15          | 45     | 14       | 40              | 44    | 47   |
|                                                    | IN-Cartoon | 41.1 | 43     | 42         | 41      | 36      | 37    | 37          | 36   | 29   | 37    | 21          | 61     | 21       | 53              | 62    | 62   |
|                                                    | IN-Drawing | 41.1 | 46     | 45         | 45      | 33      | 35    | 33          | 31   | 31   | 40    | 24          | 59     | 24       | 52              | 59    | 60   |
| LoRA (Hu et al., 2021)                             | IN-V2      | 48.8 | 49     | 47         | 47      | 45      | 47    | 46          | 41   | 35   | 46    | 36          | 65     | 36       | 60              | 68    | 65   |
|                                                    | IN-A       | 49.4 | 49     | 47         | 46      | 47      | 48    | 47          | 41   | 36   | 46    | 38          | 66     | 35       | 60              | 68    | 66   |
|                                                    | IN-R       | 49.4 | 49     | 48         | 47      | 47      | 48    | 47          | 41   | 36   | 46    | 36          | 66     | 35       | 60              | 68    | 66   |
|                                                    | IN-Sketch  | 48.8 | 49     | 48         | 47      | 47      | 48    | 47          | 41   | 36   | 46    | 33          | 65     | 33       | 59              | 67    | 66   |
|                                                    | ObjNet     | 49.4 | 49     | 47         | 46      | 48      | 49    | 48          | 41   | 36   | 46    | 36          | 66     | 34       | 61              | 68    | 67   |
|                                                    | IN-Cartoon | 48.1 | 49     | 47         | 46      | 45      | 46    | 46          | 41   | 35   | 45    | 32          | 65     | 32       | 59              | 68    | 65   |
|                                                    | IN-Drawing | 49.1 | 51     | 50         | 49      | 44      | 47    | 45          | 40   | 37   | 47    | 35          | 65     | 35       | 59              | 67    | 64   |
| EWC (Kirkpatrick et al., 2017)                     | IN-V2      | 49.5 | 49     | 47         | 46      | 46      | 48    | 47          | 41   | 36   | 46    | 38          | 66     | 37       | 60              | 68    | 66   |
|                                                    | IN-A       | 47.7 | 46     | 44         | 43      | 48      | 48    | 46          | 39   | 35   | 43    | 34          | 63     | 33       | 59              | 66    | 66   |
|                                                    | IN-R       | 50.1 | 50     | 49         | 48      | 48      | 48    | 47          | 40   | 37   | 46    | 39          | 66     | 38       | 60              | 67    | 67   |
|                                                    | IN-Sketch  | 49.8 | 50     | 48         | 48      | 48      | 48    | 47          | 41   | 38   | 46    | 39          | 66     | 37       | 60              | 67    | 66   |
|                                                    | ObjNet     | 49.9 | 48     | 47         | 45      | 49      | 49    | 48          | 42   | 37   | 46    | 40          | 66     | 37       | 61              | 68    | 67   |
|                                                    | IN-Cartoon | 48.4 | 48     | 47         | 45      | 45      | 46    | 46          | 40   | 35   | 44    | 36          | 66     | 37       | 59              | 68    | 65   |
|                                                    | IN-Drawing | 49.9 | 53     | 51         | 51      | 44      | 47    | 45          | 39   | 38   | 49    | 37          | 65     | 38       | 59              | 67    | 65   |
| LwF (Li & Hoiem, 2017)                             | IN-V2      | 51.1 | 48     | 47         | 45      | 49      | 48    | 50          | 43   | 41   | 47    | 44          | 67     | 42       | 61              | 68    | 67   |
|                                                    | IN-A       | 46.3 | 40     | 39         | 37      | 51      | 45    | 48          | 36   | 38   | 41    | 38          | 62     | 38       | 57              | 62    | 62   |
|                                                    | IN-R       | 51.6 | 52     | 51         | 50      | 51      | 49    | 49          | 38   | 43   | 50    | 46          | 65     | 44       | 58              | 64    | 64   |
|                                                    | IN-Sketch  | 50.6 | 49     | 48         | 47      | 48      | 46    | 47          | 43   | 41   | 47    | 46          | 65     | 43       | 58              | 66    | 64   |
|                                                    | ObjNet     | 48.1 | 43     | 42         | 40      | 50      | 47    | 49          | 40   | 38   | 43    | 39          | 64     | 37       | 59              | 65    | 64   |
|                                                    | IN-Cartoon | 48.8 | 45     | 44         | 42      | 47      | 43    | 47          | 40   | 38   | 43    | 42          | 68     | 43       | 58              | 68    | 66   |
|                                                    | IN-Drawing | 50.2 | 56     | 54         | 54      | 42      | 46    | 44          | 37   | 40   | 53    | 38          | 66     | 38       | 57              | 66    | 64   |
| LP-FT (Kumar et al., 2022)                         | IN-V2      | 51.1 | 48     | 46         | 45      | 50      | 48    | 50          | 42   | 41   | 47    | 44          | 67     | 42       | 61              | 67    | 67   |
|                                                    | IN-A       | 44.9 | 39     | 37         | 35      | 51      | 44    | 47          | 34   | 38   | 41    | 34          | 62     | 35       | 55              | 61    | 61   |
|                                                    | IN-R       | 50.4 | 51     | 51         | 50      | 50      | 48    | 48          | 36   | 43   | 49    | 43          | 64     | 41       | 57              | 63    | 63   |
|                                                    | IN-Sketch  | 49.4 | 49     | 48         | 46      | 48      | 46    | 47          | 41   | 41   | 46    | 43          | 64     | 39       | 56              | 65    | 63   |
|                                                    | ObjNet     | 45.9 | 41     | 40         | 38      | 50      | 44    | 47          | 36   | 38   | 42    | 35          | 62     | 35       | 57              | 63    | 62   |
|                                                    | IN-Cartoon | 47.7 | 45     | 44         | 41      | 46      | 42    | 46          | 38   | 37   | 42    | 39          | 68     | 41       | 56              | 67    | 65   |
|                                                    | IN-Drawing | 48.4 | 55     | 53         | 53      | 40      | 44    | 42          | 34   | 40   | 53    | 32          | 65     | 33       | 55              | 65    | 63   |
| WiSE-FT (Wortsman et al., 2022b)                   | IN-V2      | 50.4 | 49     | 47         | 46      | 47      | 48    | 48          | 42   | 39   | 47    | 41          | 67     | 39       | 61              | 68    | 66   |
|                                                    | IN-A       | 50.4 | 47     | 45         | 44      | 49      | 49    | 50          | 42   | 40   | 47    | 42          | 66     | 40       | 61              | 67    | 67   |
|                                                    | IN-R       | 52.8 | 54     | 53         | 52      | 49      | 50    | 49          | 42   | 43   | 51    | 45          | 68     | 43       | 61              | 68    | 67   |
|                                                    | IN-Sketch  | 50.7 | 50     | 49         | 48      | 47      | 47    | 48          | 43   | 40   | 48    | 42          | 66     | 41       | 59              | 68    | 65   |
|                                                    | ObjNet     | 50.1 | 47     | 45         | 44      | 49      | 49    | 49          | 42   | 39   | 46    | 42          | 66     | 39       | 61              | 68    | 66   |
|                                                    | IN-Cartoon | 50.0 | 48     | 47         | 45      | 47      | 46    | 48          | 41   | 38   | 46    | 41          | 68     | 41       | 60              | 69    | 66   |
|                                                    | IN-Drawing | 51.5 | 55     | 53         | 54      | 44      | 47    | 46          | 40   | 41   | 53    | 40          | 67     | 39       | 59              | 68    | 66   |
| Model Soup PRE-FT-EWC-LwF (Wortsman et al., 2022a) | IN-V2      | 50.5 | 49     | 47         | 46      | 47      | 48    | 49          | 42   | 39   | 47    | 41          | 67     | 39       | 61              | 68    | 66   |
|                                                    | IN-A       | 50.0 | 46     | 45         | 43      | 51      | 49    | 50          | 41   | 40   | 46    | 42          | 65     | 39       | 61              | 67    | 67   |
|                                                    | IN-R       | 52.8 | 54     | 53         | 52      | 49      | 50    | 49          | 41   | 42   | 50    | 45          | 68     | 43       | 61              | 67    | 67   |
|                                                    | IN-Sketch  | 50.9 | 50     | 49         | 48      | 47      | 48    | 48          | 43   | 41   | 48    | 43          | 66     | 41       | 60              | 67    | 65   |
|                                                    | ObjNet     | 50.2 | 47     | 45         | 44      | 49      | 49    | 50          | 42   | 39   | 46    | 42          | 66     | 39       | 61              | 68    | 66   |
|                                                    | IN-Cartoon | 49.8 | 48     | 46         | 45      | 47      | 46    | 47          | 41   | 38   | 45    | 41          | 68     | 41       | 60              | 69    | 66   |
|                                                    | IN-Drawing | 51.5 | 56     | 54         | 54      | 44      | 47    | 46          | 39   | 41   | 53    | 39          | 67     | 39       | 59              | 68    | 66   |

Table S27: Accuracy of ImageNet-21K with AugReg pretrained ViT-B/32 with different fine-tuning methods and downstream datasets on each ImageNet-C corruption For each corruption, accuracy is averaged across 5 levels of severity.

| Dataset                                            | Method     | Avg. | Gauss. | Noise Shot | Impulse | Defocus | Glass | Blur Motion | Zoom | Snow | Frost | Weather Fog | Bright | Contrast | Digital Elastic | Pixel | JPEG |
|----------------------------------------------------|------------|------|--------|------------|---------|---------|-------|-------------|------|------|-------|-------------|--------|----------|-----------------|-------|------|
| Pretrained                                         |            | 60.5 | 61     | 60         | 60      | 56      | 49    | 61          | 50   | 54   | 56    | 60          | 75     | 59       | 62              | 72    | 70   |
| FT                                                 | IN-V2      | 60.2 | 59     | 57         | 58      | 58      | 48    | 62          | 50   | 55   | 57    | 62          | 75     | 61       | 60              | 72    | 70   |
|                                                    | IN-A       | 56.9 | 54     | 52         | 53      | 56      | 46    | 59          | 46   | 51   | 53    | 58          | 71     | 59       | 56              | 69    | 68   |
|                                                    | IN-R       | 55.3 | 54     | 53         | 53      | 54      | 50    | 55          | 43   | 50   | 55    | 56          | 68     | 55       | 55              | 66    | 65   |
|                                                    | IN-Sketch  | 57.0 | 58     | 57         | 56      | 54      | 44    | 56          | 48   | 52   | 55    | 58          | 71     | 56       | 56              | 68    | 66   |
|                                                    | ObjNet     | 55.3 | 54     | 52         | 52      | 54      | 46    | 58          | 44   | 49   | 52    | 54          | 71     | 54       | 56              | 69    | 67   |
|                                                    | IN-Cartoon | 56.7 | 57     | 55         | 56      | 52      | 41    | 58          | 45   | 52   | 51    | 55          | 76     | 55       | 57              | 72    | 67   |
|                                                    | IN-Drawing | 59.5 | 60     | 58         | 59      | 53      | 48    | 57          | 43   | 56   | 61    | 60          | 76     | 59       | 60              | 73    | 69   |
| Linear Probing                                     | IN-V2      | 60.1 | 61     | 59         | 60      | 56      | 49    | 61          | 50   | 54   | 56    | 60          | 75     | 58       | 62              | 72    | 70   |
|                                                    | IN-A       | 59.4 | 60     | 59         | 59      | 55      | 48    | 60          | 49   | 53   | 55    | 60          | 74     | 58       | 61              | 71    | 69   |
|                                                    | IN-R       | 59.7 | 60     | 59         | 59      | 55      | 49    | 60          | 50   | 53   | 55    | 60          | 74     | 57       | 62              | 72    | 69   |
|                                                    | IN-Sketch  | 58.4 | 59     | 58         | 58      | 54      | 47    | 58          | 49   | 53   | 54    | 58          | 73     | 57       | 60              | 70    | 68   |
|                                                    | ObjNet     | 60.3 | 61     | 59         | 60      | 57      | 49    | 62          | 51   | 54   | 55    | 61          | 74     | 58       | 62              | 72    | 69   |
|                                                    | IN-Cartoon | 62.6 | 63     | 62         | 62      | 58      | 50    | 64          | 52   | 55   | 57    | 62          | 79     | 61       | 64              | 76    | 74   |
|                                                    | IN-Drawing | 63.0 | 63     | 62         | 62      | 57      | 51    | 63          | 52   | 58   | 61    | 64          | 78     | 60       | 65              | 75    | 73   |
| Visual Prompt (Bahng et al., 2022)                 | IN-V2      | 51.1 | 51     | 49         | 49      | 48      | 39    | 50          | 44   | 43   | 46    | 48          | 69     | 47       | 57              | 64    | 63   |
|                                                    | IN-A       | 39.7 | 37     | 35         | 35      | 35      | 27    | 40          | 33   | 33   | 35    | 40          | 58     | 37       | 45              | 53    | 53   |
|                                                    | IN-R       | 42.6 | 41     | 39         | 39      | 40      | 34    | 41          | 33   | 35   | 42    | 40          | 61     | 39       | 47              | 54    | 54   |
|                                                    | IN-Sketch  | 46.2 | 46     | 45         | 45      | 42      | 33    | 43          | 37   | 39   | 44    | 45          | 65     | 42       | 50              | 59    | 59   |
|                                                    | ObjNet     | 30.9 | 27     | 25         | 24      | 26      | 19    | 30          | 25   | 23   | 27    | 29          | 51     | 28       | 38              | 45    | 46   |
|                                                    | IN-Cartoon | 45.5 | 44     | 43         | 42      | 42      | 31    | 45          | 38   | 39   | 39    | 40          | 67     | 40       | 52              | 62    | 59   |
|                                                    | IN-Drawing | 46.7 | 48     | 46         | 45      | 39      | 37    | 41          | 35   | 41   | 51    | 40          | 66     | 39       | 52              | 62    | 59   |
| LoRA (Hu et al., 2021)                             | IN-V2      | 60.5 | 61     | 60         | 60      | 56      | 49    | 61          | 50   | 54   | 56    | 60          | 75     | 59       | 62              | 72    | 70   |
|                                                    | IN-A       | 61.2 | 61     | 60         | 60      | 58      | 50    | 63          | 52   | 55   | 56    | 62          | 76     | 59       | 63              | 73    | 70   |
|                                                    | IN-R       | 60.9 | 61     | 60         | 60      | 57      | 50    | 62          | 51   | 54   | 56    | 61          | 75     | 57       | 63              | 73    | 70   |
|                                                    | IN-Sketch  | 60.8 | 62     | 60         | 60      | 57      | 49    | 61          | 51   | 54   | 57    | 61          | 76     | 59       | 62              | 73    | 70   |
|                                                    | ObjNet     | 61.3 | 61     | 60         | 60      | 58      | 50    | 63          | 52   | 55   | 56    | 62          | 76     | 58       | 63              | 73    | 71   |
|                                                    | IN-Cartoon | 60.2 | 61     | 60         | 60      | 57      | 49    | 61          | 50   | 53   | 55    | 60          | 75     | 57       | 62              | 72    | 70   |
|                                                    | IN-Drawing | 61.0 | 61     | 60         | 60      | 56      | 50    | 61          | 50   | 56   | 59    | 62          | 76     | 58       | 63              | 73    | 70   |
| EWC (Kirkpatrick et al., 2017)                     | IN-V2      | 62.1 | 62     | 60         | 61      | 60      | 50    | 64          | 53   | 56   | 58    | 63          | 76     | 60       | 63              | 74    | 71   |
|                                                    | IN-A       | 60.9 | 59     | 57         | 58      | 60      | 50    | 63          | 51   | 55   | 57    | 63          | 75     | 62       | 61              | 73    | 70   |
|                                                    | IN-R       | 60.0 | 60     | 58         | 58      | 58      | 52    | 60          | 49   | 54   | 58    | 60          | 74     | 59       | 61              | 70    | 69   |
|                                                    | IN-Sketch  | 61.1 | 62     | 61         | 61      | 57      | 49    | 61          | 51   | 55   | 58    | 62          | 75     | 60       | 62              | 72    | 70   |
|                                                    | ObjNet     | 60.1 | 59     | 58         | 58      | 60      | 49    | 62          | 49   | 54   | 57    | 60          | 74     | 59       | 60              | 72    | 71   |
|                                                    | IN-Cartoon | 59.0 | 59     | 58         | 58      | 55      | 46    | 60          | 48   | 53   | 54    | 60          | 75     | 58       | 60              | 72    | 69   |
|                                                    | IN-Drawing | 61.2 | 62     | 61         | 61      | 55      | 49    | 61          | 47   | 58   | 62    | 62          | 76     | 60       | 62              | 73    | 70   |
| LwF (Li & Hoiem, 2017)                             | IN-V2      | 61.1 | 61     | 59         | 60      | 58      | 49    | 62          | 51   | 55   | 57    | 62          | 75     | 60       | 62              | 73    | 71   |
|                                                    | IN-A       | 60.6 | 60     | 58         | 58      | 58      | 49    | 62          | 51   | 55   | 56    | 62          | 75     | 60       | 61              | 73    | 70   |
|                                                    | IN-R       | 60.9 | 61     | 60         | 60      | 57      | 53    | 61          | 50   | 55   | 59    | 62          | 74     | 59       | 62              | 72    | 69   |
|                                                    | IN-Sketch  | 59.1 | 60     | 59         | 59      | 56      | 46    | 59          | 49   | 54   | 56    | 60          | 73     | 57       | 59              | 70    | 68   |
|                                                    | ObjNet     | 59.1 | 59     | 57         | 57      | 58      | 48    | 61          | 49   | 53   | 54    | 59          | 74     | 57       | 60              | 72    | 70   |
|                                                    | IN-Cartoon | 63.0 | 63     | 61         | 61      | 59      | 50    | 64          | 53   | 56   | 58    | 63          | 80     | 62       | 65              | 77    | 74   |
|                                                    | IN-Drawing | 63.1 | 64     | 61         | 62      | 59      | 51    | 63          | 50   | 58   | 62    | 63          | 79     | 61       | 64              | 77    | 73   |
| LP-FT (Kumar et al., 2022)                         | IN-V2      | 60.7 | 60     | 59         | 59      | 58      | 49    | 62          | 51   | 55   | 57    | 62          | 75     | 60       | 61              | 72    | 70   |
|                                                    | IN-A       | 59.5 | 58     | 57         | 57      | 57      | 48    | 61          | 50   | 54   | 55    | 62          | 73     | 61       | 59              | 71    | 68   |
|                                                    | IN-R       | 59.0 | 58     | 57         | 57      | 56      | 52    | 59          | 48   | 53   | 58    | 60          | 72     | 58       | 60              | 70    | 67   |
|                                                    | IN-Sketch  | 57.5 | 58     | 57         | 57      | 54      | 45    | 57          | 48   | 53   | 54    | 59          | 71     | 56       | 58              | 68    | 66   |
|                                                    | ObjNet     | 58.9 | 59     | 57         | 57      | 57      | 47    | 61          | 49   | 53   | 55    | 59          | 73     | 57       | 59              | 71    | 69   |
|                                                    | IN-Cartoon | 61.3 | 61     | 59         | 60      | 57      | 46    | 63          | 50   | 56   | 56    | 60          | 80     | 61       | 62              | 76    | 72   |
|                                                    | IN-Drawing | 62.6 | 63     | 61         | 62      | 57      | 51    | 62          | 48   | 59   | 63    | 63          | 78     | 61       | 63              | 76    | 72   |
| WiSE-FT (Wortsman et al., 2022b)                   | IN-V2      | 61.7 | 62     | 60         | 61      | 58      | 50    | 63          | 52   | 56   | 58    | 63          | 76     | 61       | 63              | 73    | 71   |
|                                                    | IN-A       | 61.9 | 61     | 59         | 60      | 59      | 50    | 64          | 52   | 56   | 58    | 64          | 76     | 62       | 63              | 74    | 71   |
|                                                    | IN-R       | 62.4 | 62     | 61         | 61      | 59      | 54    | 63          | 52   | 56   | 60    | 64          | 76     | 61       | 63              | 73    | 71   |
|                                                    | IN-Sketch  | 61.0 | 62     | 61         | 61      | 57      | 48    | 61          | 51   | 56   | 58    | 62          | 75     | 60       | 61              | 72    | 70   |
|                                                    | ObjNet     | 61.2 | 61     | 60         | 60      | 58      | 50    | 63          | 51   | 55   | 57    | 62          | 75     | 60       | 62              | 73    | 71   |
|                                                    | IN-Cartoon | 60.9 | 62     | 60         | 61      | 56      | 47    | 62          | 50   | 56   | 56    | 61          | 78     | 60       | 62              | 74    | 71   |
|                                                    | IN-Drawing | 63.6 | 65     | 63         | 64      | 59      | 51    | 64          | 51   | 59   | 62    | 64          | 78     | 62       | 64              | 75    | 73   |
| Model Soup PRE-FT-EWC-LwF (Wortsman et al., 2022a) | IN-V2      | 61.7 | 62     | 60         | 61      | 59      | 50    | 63          | 52   | 56   | 58    | 63          | 76     | 61       | 63              | 73    | 71   |
|                                                    | IN-A       | 61.6 | 60     | 59         | 59      | 59      | 50    | 64          | 52   | 56   | 57    | 64          | 75     | 62       | 62              | 74    | 71   |
|                                                    | IN-R       | 62.2 | 62     | 61         | 61      | 59      | 54    | 63          | 51   | 56   | 60    | 63          | 76     | 61       | 63              | 73    | 71   |
|                                                    | IN-Sketch  | 61.0 | 62     | 61         | 61      | 57      | 48    | 61          | 51   | 56   | 58    | 62          | 75     | 60       | 61              | 72    | 70   |
|                                                    | ObjNet     | 60.9 | 61     | 59         | 59      | 58      | 49    | 63          | 51   | 55   | 56    | 61          | 75     | 59       | 62              | 73    | 71   |
|                                                    | IN-Cartoon | 61.1 | 62     | 60         | 60      | 57      | 47    | 62          | 50   | 56   | 56    | 61          | 78     | 60       | 62              | 74    | 72   |
|                                                    | IN-Drawing | 63.3 | 65     | 63         | 64      | 58      | 51    | 64          | 51   | 59   | 62    | 63          | 78     | 62       | 64              | 75    | 73   |

Table S28: Accuracy of LAION-2B pretrained ViT-B/32 with different fine-tuning methods and downstream datasets on each ImageNet-C corruption. For each corruption, accuracy is averaged across 5 levels of severity.

| Dataset                                            | Method     | Avg. | Gauss. | Noise Shot | Impulse | Defocus | Glass | Blur Motion | Zoom | Snow | Frost | Weather Fog | Bright | Contrast | Digital Elastic | Pixel | JPEG |
|----------------------------------------------------|------------|------|--------|------------|---------|---------|-------|-------------|------|------|-------|-------------|--------|----------|-----------------|-------|------|
| Pretrained                                         |            | 57.5 | 56     | 55         | 55      | 53      | 42    | 57          | 46   | 52   | 51    | 61          | 75     | 64       | 59              | 68    | 69   |
| FT                                                 | IN-V2      | 21.7 | 20     | 19         | 18      | 11      | 15    | 15          | 15   | 14   | 20    | 23          | 36     | 25       | 28              | 31    | 36   |
|                                                    | IN-A       | 7.0  | 8      | 7          | 7       | 4       | 5     | 4           | 5    | 4    | 5     | 7           | 12     | 8        | 8               | 10    | 11   |
|                                                    | IN-R       | 20.9 | 20     | 19         | 18      | 14      | 17    | 17          | 15   | 12   | 20    | 22          | 33     | 25       | 23              | 28    | 31   |
|                                                    | IN-Sketch  | 9.7  | 10     | 10         | 9       | 4       | 5     | 5           | 6    | 7    | 11    | 11          | 17     | 13       | 9               | 11    | 17   |
|                                                    | ObjNet     | 12.2 | 12     | 11         | 11      | 7       | 9     | 10          | 10   | 5    | 9     | 13          | 20     | 15       | 14              | 18    | 20   |
|                                                    | IN-Cartoon | 27.3 | 25     | 24         | 21      | 10      | 16    | 17          | 15   | 21   | 25    | 27          | 51     | 31       | 35              | 46    | 47   |
|                                                    | IN-Drawing | 21.6 | 20     | 17         | 19      | 9       | 13    | 14          | 13   | 15   | 32    | 20          | 46     | 22       | 24              | 29    | 30   |
| Linear Probing                                     | IN-V2      | 58.1 | 57     | 56         | 56      | 53      | 42    | 58          | 46   | 53   | 52    | 63          | 76     | 65       | 59              | 68    | 68   |
|                                                    | IN-A       | 58.2 | 56     | 54         | 55      | 52      | 44    | 58          | 47   | 54   | 53    | 64          | 76     | 66       | 59              | 68    | 68   |
|                                                    | IN-R       | 56.1 | 54     | 53         | 53      | 50      | 44    | 55          | 43   | 51   | 54    | 61          | 73     | 64       | 57              | 65    | 66   |
|                                                    | IN-Sketch  | 55.6 | 55     | 54         | 53      | 50      | 42    | 54          | 43   | 51   | 52    | 60          | 73     | 61       | 55              | 65    | 67   |
|                                                    | ObjNet     | 56.6 | 55     | 53         | 53      | 51      | 42    | 57          | 44   | 51   | 51    | 62          | 75     | 63       | 58              | 67    | 67   |
|                                                    | IN-Cartoon | 51.2 | 50     | 47         | 48      | 43      | 36    | 49          | 38   | 46   | 45    | 57          | 72     | 59       | 53              | 62    | 61   |
|                                                    | IN-Drawing | 49.8 | 53     | 52         | 52      | 37      | 38    | 45          | 34   | 45   | 52    | 54          | 67     | 53       | 51              | 57    | 57   |
| Visual Prompt (Bahng et al., 2022)                 | IN-V2      | 47.9 | 49     | 48         | 47      | 39      | 32    | 45          | 38   | 41   | 42    | 49          | 68     | 50       | 51              | 58    | 61   |
|                                                    | IN-A       | 36.9 | 34     | 33         | 31      | 28      | 20    | 33          | 26   | 31   | 31    | 42          | 62     | 42       | 42              | 46    | 51   |
|                                                    | IN-R       | 43.9 | 42     | 42         | 40      | 39      | 29    | 41          | 34   | 38   | 41    | 46          | 65     | 44       | 48              | 52    | 58   |
|                                                    | IN-Sketch  | 45.1 | 44     | 43         | 42      | 39      | 28    | 42          | 36   | 39   | 41    | 48          | 66     | 47       | 48              | 54    | 59   |
|                                                    | ObjNet     | 27.7 | 27     | 26         | 25      | 21      | 14    | 23          | 19   | 21   | 22    | 31          | 50     | 30       | 32              | 37    | 40   |
|                                                    | IN-Cartoon | 44.9 | 44     | 43         | 42      | 39      | 28    | 41          | 34   | 39   | 38    | 44          | 68     | 46       | 49              | 57    | 60   |
|                                                    | IN-Drawing | 47.2 | 50     | 50         | 48      | 36      | 33    | 43          | 35   | 42   | 47    | 44          | 67     | 43       | 52              | 57    | 61   |
| LoRA (Hu et al., 2021)                             | IN-V2      | 58.1 | 57     | 56         | 56      | 53      | 42    | 58          | 46   | 53   | 52    | 63          | 76     | 65       | 59              | 68    | 68   |
|                                                    | IN-A       | 57.9 | 56     | 54         | 55      | 51      | 44    | 58          | 46   | 54   | 53    | 64          | 76     | 65       | 58              | 68    | 67   |
|                                                    | IN-R       | 54.8 | 53     | 52         | 52      | 48      | 43    | 53          | 41   | 49   | 53    | 60          | 73     | 62       | 55              | 64    | 65   |
|                                                    | IN-Sketch  | 53.4 | 53     | 53         | 52      | 45      | 40    | 51          | 41   | 49   | 50    | 58          | 70     | 58       | 52              | 63    | 64   |
|                                                    | ObjNet     | 54.9 | 53     | 52         | 52      | 47      | 41    | 54          | 42   | 48   | 49    | 61          | 74     | 61       | 56              | 67    | 66   |
|                                                    | IN-Cartoon | 50.3 | 49     | 47         | 47      | 43      | 35    | 49          | 37   | 46   | 45    | 56          | 72     | 58       | 52              | 61    | 60   |
|                                                    | IN-Drawing | 49.8 | 52     | 51         | 51      | 38      | 38    | 46          | 34   | 45   | 52    | 54          | 67     | 53       | 51              | 58    | 56   |
| EWC (Kirkpatrick et al., 2017)                     | IN-V2      | 48.4 | 47     | 45         | 46      | 40      | 34    | 44          | 35   | 36   | 45    | 58          | 69     | 56       | 50              | 58    | 62   |
|                                                    | IN-A       | 30.7 | 28     | 26         | 27      | 24      | 19    | 27          | 21   | 19   | 23    | 41          | 46     | 44       | 31              | 38    | 44   |
|                                                    | IN-R       | 53.0 | 51     | 50         | 50      | 46      | 44    | 50          | 38   | 48   | 52    | 58          | 70     | 58       | 53              | 61    | 65   |
|                                                    | IN-Sketch  | 39.7 | 40     | 39         | 39      | 27      | 23    | 32          | 26   | 43   | 46    | 56          | 51     | 41       | 37              | 44    | 51   |
|                                                    | ObjNet     | 43.0 | 38     | 36         | 37      | 38      | 33    | 42          | 32   | 31   | 39    | 50          | 65     | 51       | 45              | 53    | 56   |
|                                                    | IN-Cartoon | 48.1 | 46     | 44         | 44      | 41      | 32    | 45          | 33   | 45   | 43    | 53          | 71     | 54       | 50              | 61    | 59   |
|                                                    | IN-Drawing | 43.6 | 47     | 42         | 46      | 26      | 30    | 35          | 27   | 44   | 52    | 48          | 68     | 46       | 45              | 48    | 50   |
| LwF (Li & Hoiem, 2017)                             | IN-V2      | 26.1 | 23     | 21         | 20      | 14      | 19    | 20          | 18   | 17   | 23    | 30          | 43     | 30       | 33              | 37    | 43   |
|                                                    | IN-A       | 14.5 | 15     | 14         | 14      | 8       | 10    | 10          | 9    | 8    | 10    | 15          | 25     | 16       | 17              | 21    | 24   |
|                                                    | IN-R       | 28.9 | 26     | 24         | 23      | 22      | 24    | 25          | 22   | 18   | 28    | 30          | 45     | 32       | 33              | 39    | 42   |
|                                                    | IN-Sketch  | 13.7 | 15     | 14         | 13      | 5       | 7     | 8           | 8    | 10   | 16    | 15          | 24     | 16       | 14              | 16    | 24   |
|                                                    | ObjNet     | 20.7 | 19     | 17         | 17      | 13      | 16    | 18          | 16   | 9    | 16    | 22          | 33     | 24       | 25              | 31    | 33   |
|                                                    | IN-Cartoon | 36.6 | 32     | 31         | 26      | 17      | 25    | 26          | 21   | 30   | 36    | 35          | 64     | 39       | 48              | 57    | 62   |
|                                                    | IN-Drawing | 28.2 | 25     | 22         | 22      | 14      | 20    | 20          | 17   | 22   | 38    | 29          | 55     | 27       | 32              | 39    | 40   |
| LP-FT (Kumar et al., 2022)                         | IN-V2      | 22.0 | 21     | 19         | 19      | 12      | 16    | 16          | 15   | 13   | 18    | 23          | 36     | 24       | 28              | 32    | 36   |
|                                                    | IN-A       | 9.0  | 10     | 10         | 10      | 5       | 6     | 6           | 6    | 5    | 6     | 9           | 15     | 10       | 11              | 13    | 14   |
|                                                    | IN-R       | 22.2 | 21     | 20         | 19      | 15      | 18    | 18          | 16   | 13   | 21    | 22          | 35     | 26       | 25              | 30    | 33   |
|                                                    | IN-Sketch  | 11.5 | 12     | 12         | 11      | 5       | 6     | 6           | 7    | 8    | 13    | 12          | 21     | 15       | 12              | 13    | 20   |
|                                                    | ObjNet     | 14.4 | 14     | 13         | 12      | 9       | 12    | 12          | 11   | 7    | 11    | 15          | 23     | 17       | 17              | 21    | 23   |
|                                                    | IN-Cartoon | 28.6 | 26     | 25         | 21      | 12      | 18    | 19          | 16   | 22   | 26    | 26          | 53     | 32       | 37              | 47    | 50   |
|                                                    | IN-Drawing | 22.7 | 21     | 18         | 19      | 9       | 13    | 14          | 13   | 17   | 34    | 22          | 47     | 25       | 26              | 30    | 30   |
| WiSE-FT (Wortsman et al., 2022b)                   | IN-V2      | 43.5 | 40     | 37         | 38      | 33      | 33    | 37          | 31   | 33   | 41    | 52          | 63     | 52       | 49              | 55    | 59   |
|                                                    | IN-A       | 37.0 | 35     | 33         | 33      | 29      | 29    | 32          | 26   | 24   | 31    | 48          | 53     | 47       | 39              | 45    | 51   |
|                                                    | IN-R       | 46.5 | 44     | 42         | 42      | 39      | 40    | 41          | 33   | 36   | 46    | 53          | 65     | 53       | 50              | 55    | 60   |
|                                                    | IN-Sketch  | 33.3 | 35     | 33         | 33      | 20      | 20    | 23          | 19   | 28   | 38    | 45          | 49     | 40       | 34              | 35    | 47   |
|                                                    | ObjNet     | 41.6 | 39     | 37         | 37      | 33      | 32    | 38          | 31   | 27   | 37    | 49          | 60     | 49       | 45              | 53    | 57   |
|                                                    | IN-Cartoon | 48.8 | 48     | 46         | 45      | 32      | 34    | 40          | 30   | 45   | 47    | 54          | 73     | 52       | 56              | 64    | 65   |
|                                                    | IN-Drawing | 44.7 | 45     | 40         | 43      | 28      | 33    | 35          | 27   | 42   | 54    | 49          | 71     | 47       | 48              | 54    | 56   |
| Model Soup PRE-FT-EWC-LwF (Wortsman et al., 2022a) | IN-V2      | 46.5 | 45     | 43         | 43      | 35      | 36    | 39          | 32   | 38   | 44    | 54          | 65     | 53       | 52              | 57    | 62   |
|                                                    | IN-A       | 40.5 | 39     | 36         | 37      | 33      | 32    | 35          | 28   | 28   | 34    | 50          | 58     | 49       | 43              | 50    | 55   |
|                                                    | IN-R       | 49.8 | 49     | 48         | 48      | 42      | 43    | 45          | 35   | 41   | 49    | 54          | 67     | 54       | 53              | 58    | 62   |
|                                                    | IN-Sketch  | 34.7 | 38     | 36         | 36      | 21      | 21    | 24          | 19   | 32   | 41    | 45          | 50     | 39       | 35              | 37    | 48   |
|                                                    | ObjNet     | 45.1 | 44     | 42         | 42      | 36      | 35    | 42          | 33   | 32   | 40    | 51          | 64     | 50       | 49              | 56    | 60   |
|                                                    | IN-Cartoon | 50.9 | 52     | 50         | 49      | 34      | 35    | 41          | 30   | 50   | 50    | 56          | 75     | 53       | 58              | 64    | 67   |
|                                                    | IN-Drawing | 46.2 | 48     | 43         | 47      | 28      | 34    | 36          | 27   | 46   | 56    | 51          | 72     | 46       | 50              | 53    | 57   |

Table S29: Accuracy of OpenAI CLIP ViT-B/32 with different fine-tuning methods and downstream datasets on each ImageNet-C corruption. For each corruption, accuracy is averaged across 5 levels of severity.

| Dataset                                                  | Method     | Avg. | Gauss. | Noise Shot | Impulse | Defocus | Glass | Blur Motion | Zoom | Snow | Frost | Fog | Bright | Contrast | Digital Elastic | Pixel | JPEG |
|----------------------------------------------------------|------------|------|--------|------------|---------|---------|-------|-------------|------|------|-------|-----|--------|----------|-----------------|-------|------|
| Pretrained                                               |            | 57.9 | 58     | 56         | 56      | 53      | 41    | 57          | 46   | 52   | 53    | 61  | 76     | 64       | 60              | 68    | 68   |
| FT                                                       | IN-V2      | 25.9 | 23     | 22         | 21      | 16      | 20    | 20          | 19   | 17   | 23    | 29  | 39     | 30       | 33              | 37    | 39   |
|                                                          | IN-A       | 10.1 | 10     | 9          | 10      | 7       | 8     | 8           | 7    | 6    | 7     | 10  | 15     | 12       | 13              | 15    | 15   |
|                                                          | IN-R       | 23.1 | 21     | 20         | 20      | 17      | 20    | 19          | 17   | 15   | 23    | 23  | 37     | 26       | 26              | 30    | 32   |
|                                                          | IN-Sketch  | 11.1 | 12     | 11         | 11      | 4       | 5     | 6           | 6    | 8    | 12    | 12  | 21     | 14       | 11              | 14    | 20   |
|                                                          | ObjNet     | 13.4 | 12     | 11         | 11      | 9       | 11    | 11          | 11   | 6    | 10    | 15  | 20     | 16       | 16              | 20    | 20   |
|                                                          | IN-Cartoon | 31.4 | 27     | 26         | 23      | 13      | 20    | 22          | 18   | 25   | 30    | 29  | 57     | 34       | 41              | 52    | 52   |
|                                                          | IN-Drawing | 24.6 | 23     | 20         | 21      | 11      | 15    | 16          | 15   | 20   | 37    | 24  | 51     | 24       | 28              | 33    | 32   |
| Linear Probing                                           | IN-V2      | 59.0 | 58     | 57         | 57      | 54      | 43    | 60          | 48   | 53   | 54    | 64  | 76     | 65       | 60              | 68    | 68   |
|                                                          | IN-A       | 58.5 | 57     | 55         | 55      | 52      | 43    | 61          | 48   | 53   | 53    | 64  | 76     | 66       | 60              | 68    | 67   |
|                                                          | IN-R       | 55.5 | 56     | 55         | 55      | 48      | 44    | 55          | 43   | 49   | 54    | 59  | 72     | 59       | 56              | 64    | 65   |
|                                                          | IN-Sketch  | 55.4 | 55     | 53         | 53      | 51      | 42    | 55          | 43   | 48   | 52    | 60  | 72     | 61       | 55              | 66    | 66   |
|                                                          | ObjNet     | 56.7 | 56     | 54         | 54      | 52      | 41    | 59          | 45   | 50   | 50    | 62  | 75     | 63       | 59              | 65    | 66   |
|                                                          | IN-Cartoon | 53.1 | 52     | 49         | 50      | 46      | 38    | 53          | 39   | 46   | 46    | 58  | 74     | 60       | 55              | 66    | 64   |
|                                                          | IN-Drawing | 48.6 | 49     | 47         | 47      | 38      | 39    | 45          | 34   | 43   | 52    | 52  | 67     | 52       | 52              | 58    | 53   |
| Visual Prompt<br>(Bahng et al., 2022)                    | IN-V2      | 50.1 | 52     | 50         | 50      | 42      | 34    | 49          | 40   | 43   | 44    | 50  | 70     | 51       | 54              | 60    | 61   |
|                                                          | IN-A       | 39.6 | 35     | 34         | 32      | 33      | 25    | 38          | 32   | 33   | 33    | 44  | 63     | 44       | 47              | 50    | 51   |
|                                                          | IN-R       | 44.2 | 44     | 43         | 42      | 38      | 30    | 41          | 34   | 37   | 42    | 45  | 65     | 43       | 48              | 53    | 56   |
|                                                          | IN-Sketch  | 47.2 | 47     | 46         | 45      | 42      | 31    | 45          | 39   | 39   | 42    | 49  | 67     | 49       | 51              | 57    | 59   |
|                                                          | ObjNet     | 29.5 | 25     | 24         | 23      | 26      | 18    | 27          | 22   | 23   | 23    | 31  | 53     | 31       | 37              | 39    | 41   |
|                                                          | IN-Cartoon | 45.4 | 46     | 44         | 44      | 39      | 28    | 43          | 34   | 38   | 39    | 43  | 68     | 45       | 51              | 59    | 60   |
|                                                          | IN-Drawing | 46.1 | 50     | 50         | 48      | 37      | 33    | 41          | 34   | 40   | 47    | 40  | 66     | 40       | 51              | 56    | 58   |
| LoRA<br>(Hu et al., 2021)                                | IN-V2      | 58.9 | 59     | 57         | 57      | 54      | 43    | 60          | 48   | 52   | 54    | 63  | 76     | 65       | 60              | 68    | 68   |
|                                                          | IN-A       | 58.1 | 57     | 55         | 55      | 52      | 43    | 61          | 47   | 52   | 53    | 64  | 75     | 65       | 58              | 67    | 66   |
|                                                          | IN-R       | 55.1 | 56     | 54         | 55      | 48      | 44    | 55          | 42   | 48   | 53    | 58  | 72     | 57       | 55              | 64    | 65   |
|                                                          | IN-Sketch  | 53.5 | 53     | 52         | 51      | 46      | 41    | 52          | 40   | 49   | 51    | 59  | 70     | 57       | 53              | 64    | 64   |
|                                                          | ObjNet     | 53.4 | 53     | 51         | 51      | 46      | 38    | 55          | 41   | 46   | 46    | 60  | 72     | 59       | 55              | 63    | 65   |
|                                                          | IN-Cartoon | 52.0 | 51     | 48         | 49      | 45      | 37    | 51          | 38   | 45   | 46    | 57  | 73     | 59       | 54              | 64    | 63   |
|                                                          | IN-Drawing | 48.4 | 48     | 47         | 47      | 40      | 39    | 46          | 34   | 43   | 51    | 51  | 66     | 52       | 51              | 58    | 54   |
| EWC<br>(Kirkpatrick et al., 2017)                        | IN-V2      | 53.9 | 53     | 52         | 52      | 47      | 41    | 52          | 37   | 45   | 50    | 61  | 72     | 60       | 55              | 65    | 65   |
|                                                          | IN-A       | 40.9 | 39     | 37         | 38      | 36      | 31    | 40          | 28   | 30   | 34    | 49  | 57     | 50       | 41              | 51    | 52   |
|                                                          | IN-R       | 52.5 | 51     | 50         | 50      | 45      | 45    | 50          | 38   | 48   | 52    | 57  | 69     | 57       | 53              | 60    | 63   |
|                                                          | IN-Sketch  | 38.8 | 41     | 40         | 40      | 25      | 22    | 31          | 23   | 44   | 45    | 55  | 47     | 41       | 36              | 44    | 49   |
|                                                          | ObjNet     | 44.7 | 42     | 40         | 40      | 40      | 34    | 46          | 32   | 35   | 39    | 50  | 64     | 51       | 45              | 55    | 57   |
|                                                          | IN-Cartoon | 48.1 | 47     | 45         | 45      | 39      | 30    | 46          | 33   | 44   | 42    | 53  | 71     | 55       | 51              | 62    | 58   |
|                                                          | IN-Drawing | 48.7 | 51     | 48         | 49      | 34      | 36    | 43          | 33   | 47   | 55    | 52  | 70     | 52       | 51              | 56    | 53   |
| LwF<br>(Li & Hoiem, 2017)                                | IN-V2      | 30.2 | 28     | 26         | 26      | 19      | 25    | 23          | 21   | 19   | 26    | 32  | 46     | 33       | 38              | 44    | 46   |
|                                                          | IN-A       | 17.6 | 16     | 15         | 15      | 11      | 14    | 13          | 13   | 10   | 14    | 19  | 28     | 21       | 22              | 26    | 27   |
|                                                          | IN-R       | 30.1 | 26     | 25         | 24      | 22      | 26    | 26          | 22   | 21   | 30    | 30  | 46     | 33       | 35              | 41    | 42   |
|                                                          | IN-Sketch  | 15.3 | 17     | 16         | 16      | 6       | 8     | 9           | 8    | 11   | 17    | 17  | 27     | 18       | 16              | 19    | 27   |
|                                                          | ObjNet     | 23.1 | 22     | 20         | 20      | 16      | 20    | 21          | 18   | 11   | 17    | 24  | 36     | 26       | 28              | 34    | 34   |
|                                                          | IN-Cartoon | 39.6 | 33     | 32         | 27      | 19      | 29    | 30          | 24   | 34   | 41    | 38  | 67     | 41       | 52              | 63    | 63   |
|                                                          | IN-Drawing | 29.6 | 26     | 23         | 24      | 15      | 21    | 21          | 20   | 24   | 42    | 28  | 58     | 28       | 34              | 41    | 39   |
| LP-FT<br>(Kumar et al., 2022)                            | IN-V2      | 26.0 | 23     | 22         | 22      | 14      | 20    | 21          | 18   | 17   | 23    | 29  | 41     | 30       | 33              | 38    | 40   |
|                                                          | IN-A       | 11.6 | 11     | 11         | 11      | 8       | 10    | 9           | 8    | 6    | 8     | 13  | 18     | 14       | 15              | 17    | 17   |
|                                                          | IN-R       | 25.7 | 24     | 23         | 22      | 19      | 22    | 22          | 18   | 17   | 26    | 27  | 40     | 28       | 29              | 34    | 36   |
|                                                          | IN-Sketch  | 12.3 | 14     | 13         | 13      | 5       | 6     | 7           | 6    | 8    | 14    | 13  | 23     | 15       | 12              | 15    | 21   |
|                                                          | ObjNet     | 16.3 | 15     | 13         | 13      | 11      | 15    | 15          | 13   | 8    | 14    | 17  | 25     | 19       | 19              | 25    | 23   |
|                                                          | IN-Cartoon | 31.3 | 27     | 25         | 22      | 14      | 21    | 22          | 18   | 24   | 30    | 28  | 58     | 33       | 42              | 53    | 51   |
|                                                          | IN-Drawing | 25.7 | 24     | 21         | 22      | 11      | 16    | 17          | 15   | 20   | 37    | 26  | 53     | 27       | 30              | 36    | 33   |
| WiSE-FT<br>(Wortsman et al., 2022b)                      | IN-V2      | 49.1 | 48     | 46         | 46      | 39      | 41    | 44          | 35   | 39   | 45    | 55  | 66     | 54       | 54              | 62    | 63   |
|                                                          | IN-A       | 43.3 | 43     | 41         | 42      | 35      | 36    | 38          | 30   | 30   | 36    | 50  | 60     | 50       | 47              | 55    | 57   |
|                                                          | IN-R       | 49.5 | 48     | 47         | 47      | 40      | 43    | 44          | 34   | 42   | 50    | 52  | 67     | 54       | 54              | 59    | 61   |
|                                                          | IN-Sketch  | 36.3 | 39     | 38         | 38      | 21      | 22    | 25          | 20   | 32   | 40    | 44  | 54     | 40       | 38              | 42    | 51   |
|                                                          | ObjNet     | 46.7 | 45     | 43         | 44      | 38      | 39    | 44          | 34   | 35   | 42    | 51  | 64     | 51       | 51              | 59    | 60   |
|                                                          | IN-Cartoon | 50.8 | 48     | 46         | 45      | 35      | 38    | 43          | 33   | 47   | 49    | 55  | 74     | 55       | 60              | 68    | 67   |
|                                                          | IN-Drawing | 46.9 | 48     | 43         | 47      | 28      | 34    | 35          | 29   | 47   | 57    | 51  | 73     | 48       | 50              | 56    | 56   |
| Model Soup<br>PRE-FT-EWC-LwF<br>(Wortsman et al., 2022a) | IN-V2      | 50.2 | 51     | 49         | 50      | 39      | 42    | 44          | 35   | 42   | 46    | 55  | 67     | 54       | 56              | 62    | 63   |
|                                                          | IN-A       | 44.3 | 45     | 42         | 44      | 36      | 36    | 39          | 30   | 32   | 36    | 50  | 61     | 51       | 49              | 56    | 58   |
|                                                          | IN-R       | 51.8 | 51     | 50         | 50      | 43      | 45    | 46          | 36   | 46   | 52    | 54  | 69     | 55       | 56              | 61    | 63   |
|                                                          | IN-Sketch  | 37.2 | 41     | 40         | 40      | 22      | 22    | 26          | 20   | 34   | 42    | 46  | 54     | 39       | 39              | 42    | 52   |
|                                                          | ObjNet     | 48.7 | 48     | 46         | 47      | 40      | 41    | 46          | 35   | 38   | 43    | 52  | 66     | 52       | 53              | 61    | 62   |
|                                                          | IN-Cartoon | 51.7 | 48     | 46         | 45      | 35      | 39    | 44          | 33   | 50   | 51    | 56  | 75     | 56       | 61              | 69    | 67   |
|                                                          | IN-Drawing | 47.9 | 50     | 45         | 49      | 29      | 35    | 36          | 30   | 49   | 59    | 52  | 74     | 49       | 51              | 57    | 56   |



Table S30: Accuracy of ImageNet-1K with AugReg pretrained ViT-S/16 with with different fine-tuning methods and downstream datasets on each ImageNet-C corruption. For each corruption, accuracy is averaged across 5 levels of severity.

| Dataset                                            | Method     | Avg. | Gauss. | Noise Shot | Impulse | Defocus | Glass | Blur Motion | Zoom | Snow | Frost | Weather Fog | Bright | Contrast | Digital Elastic | Pixel | JPEG |
|----------------------------------------------------|------------|------|--------|------------|---------|---------|-------|-------------|------|------|-------|-------------|--------|----------|-----------------|-------|------|
| Pretrained                                         |            | 53.2 | 54     | 52         | 52      | 46      | 37    | 50          | 42   | 48   | 52    | 58          | 73     | 53       | 55              | 63    | 63   |
| FT                                                 | IN-V2      | 51.2 | 49     | 47         | 46      | 46      | 36    | 50          | 38   | 50   | 52    | 58          | 70     | 52       | 52              | 60    | 62   |
|                                                    | IN-A       | 44.1 | 43     | 40         | 40      | 42      | 31    | 44          | 31   | 42   | 43    | 47          | 62     | 44       | 44              | 51    | 57   |
|                                                    | IN-R       | 42.7 | 40     | 39         | 37      | 39      | 37    | 41          | 31   | 39   | 44    | 47          | 58     | 44       | 44              | 50    | 52   |
|                                                    | IN-Sketch  | 45.5 | 44     | 42         | 42      | 38      | 31    | 42          | 35   | 42   | 46    | 50          | 64     | 49       | 46              | 53    | 55   |
|                                                    | ObjNet     | 41.9 | 40     | 38         | 38      | 40      | 30    | 43          | 30   | 38   | 38    | 45          | 61     | 39       | 43              | 51    | 54   |
|                                                    | IN-Cartoon | 44.4 | 44     | 42         | 41      | 36      | 28    | 41          | 28   | 41   | 40    | 46          | 71     | 46       | 47              | 58    | 54   |
|                                                    | IN-Drawing | 46.0 | 45     | 43         | 43      | 34      | 36    | 43          | 33   | 44   | 51    | 49          | 69     | 44       | 48              | 57    | 53   |
| Linear Probing                                     | IN-V2      | 53.1 | 54     | 52         | 52      | 46      | 37    | 50          | 42   | 49   | 52    | 58          | 72     | 53       | 55              | 63    | 63   |
|                                                    | IN-A       | 53.0 | 53     | 51         | 51      | 46      | 37    | 51          | 42   | 49   | 51    | 59          | 72     | 53       | 55              | 62    | 62   |
|                                                    | IN-R       | 53.0 | 53     | 51         | 51      | 47      | 38    | 52          | 42   | 49   | 52    | 57          | 72     | 52       | 55              | 62    | 63   |
|                                                    | IN-Sketch  | 50.9 | 51     | 50         | 49      | 45      | 35    | 48          | 40   | 48   | 50    | 55          | 70     | 50       | 53              | 59    | 61   |
|                                                    | ObjNet     | 53.4 | 53     | 52         | 51      | 47      | 38    | 52          | 43   | 49   | 52    | 59          | 72     | 51       | 56              | 62    | 63   |
|                                                    | IN-Cartoon | 52.6 | 53     | 51         | 51      | 45      | 37    | 49          | 41   | 47   | 50    | 56          | 74     | 52       | 55              | 63    | 64   |
|                                                    | IN-Drawing | 54.3 | 55     | 53         | 52      | 46      | 39    | 51          | 42   | 53   | 57    | 58          | 74     | 51       | 58              | 63    | 65   |
| Visual Prompt (Bahng et al., 2022)                 | IN-V2      | 43.9 | 42     | 41         | 40      | 36      | 28    | 40          | 37   | 39   | 41    | 45          | 66     | 46       | 50              | 53    | 57   |
|                                                    | IN-A       | 32.1 | 26     | 25         | 22      | 27      | 18    | 30          | 25   | 29   | 29    | 37          | 55     | 35       | 39              | 38    | 45   |
|                                                    | IN-R       | 35.0 | 34     | 34         | 32      | 26      | 23    | 30          | 26   | 31   | 37    | 34          | 57     | 33       | 41              | 41    | 46   |
|                                                    | IN-Sketch  | 39.2 | 38     | 37         | 36      | 31      | 24    | 34          | 31   | 35   | 39    | 42          | 61     | 40       | 43              | 45    | 50   |
|                                                    | ObjNet     | 26.8 | 21     | 20         | 18      | 19      | 15    | 25          | 22   | 23   | 23    | 29          | 51     | 27       | 36              | 33    | 42   |
|                                                    | IN-Cartoon | 36.0 | 33     | 32         | 31      | 28      | 20    | 32          | 29   | 30   | 31    | 35          | 63     | 34       | 44              | 48    | 50   |
|                                                    | IN-Drawing | 40.7 | 41     | 39         | 39      | 30      | 28    | 35          | 31   | 36   | 45    | 37          | 62     | 38       | 46              | 50    | 51   |
| LoRA (Hu et al., 2021)                             | IN-V2      | 53.5 | 54     | 52         | 52      | 46      | 37    | 50          | 42   | 49   | 52    | 58          | 73     | 53       | 55              | 63    | 64   |
|                                                    | IN-A       | 53.5 | 54     | 52         | 52      | 47      | 38    | 52          | 43   | 49   | 52    | 57          | 73     | 51       | 56              | 62    | 63   |
|                                                    | IN-R       | 52.8 | 54     | 52         | 51      | 46      | 38    | 52          | 42   | 49   | 52    | 54          | 73     | 47       | 56              | 62    | 64   |
|                                                    | IN-Sketch  | 53.5 | 54     | 52         | 52      | 48      | 37    | 50          | 43   | 49   | 53    | 58          | 73     | 52       | 55              | 62    | 64   |
|                                                    | ObjNet     | 53.0 | 54     | 52         | 52      | 47      | 38    | 52          | 43   | 49   | 52    | 57          | 73     | 47       | 56              | 62    | 64   |
|                                                    | IN-Cartoon | 51.3 | 52     | 50         | 50      | 45      | 37    | 48          | 40   | 46   | 50    | 53          | 72     | 49       | 53              | 62    | 62   |
|                                                    | IN-Drawing | 54.6 | 55     | 54         | 53      | 46      | 38    | 51          | 41   | 52   | 58    | 60          | 73     | 54       | 56              | 63    | 64   |
| EWC (Kirkpatrick et al., 2017)                     | IN-V2      | 55.4 | 55     | 53         | 52      | 50      | 38    | 54          | 43   | 53   | 55    | 62          | 74     | 57       | 57              | 64    | 65   |
|                                                    | IN-A       | 51.4 | 49     | 46         | 46      | 49      | 34    | 52          | 39   | 49   | 52    | 57          | 71     | 56       | 50              | 58    | 63   |
|                                                    | IN-R       | 51.8 | 50     | 48         | 48      | 46      | 42    | 51          | 37   | 49   | 55    | 57          | 69     | 54       | 52              | 56    | 62   |
|                                                    | IN-Sketch  | 54.0 | 53     | 52         | 52      | 47      | 39    | 51          | 43   | 51   | 55    | 59          | 72     | 56       | 55              | 61    | 63   |
|                                                    | ObjNet     | 51.7 | 51     | 49         | 49      | 48      | 35    | 52          | 39   | 49   | 50    | 57          | 70     | 52       | 52              | 59    | 63   |
|                                                    | IN-Cartoon | 49.1 | 49     | 47         | 47      | 42      | 32    | 46          | 35   | 44   | 46    | 54          | 71     | 51       | 51              | 61    | 60   |
|                                                    | IN-Drawing | 53.2 | 54     | 52         | 52      | 44      | 37    | 50          | 39   | 51   | 58    | 58          | 71     | 55       | 54              | 62    | 62   |
| LwF (Li & Hoiem, 2017)                             | IN-V2      | 53.5 | 52     | 51         | 50      | 47      | 38    | 51          | 41   | 51   | 53    | 60          | 72     | 53       | 55              | 63    | 64   |
|                                                    | IN-A       | 51.7 | 50     | 48         | 48      | 47      | 37    | 51          | 39   | 49   | 51    | 57          | 71     | 54       | 53              | 60    | 62   |
|                                                    | IN-R       | 51.8 | 50     | 48         | 47      | 45      | 42    | 50          | 40   | 48   | 53    | 56          | 69     | 52       | 54              | 61    | 61   |
|                                                    | IN-Sketch  | 48.6 | 48     | 46         | 47      | 41      | 33    | 45          | 38   | 46   | 49    | 52          | 68     | 51       | 50              | 58    | 59   |
|                                                    | ObjNet     | 50.4 | 50     | 48         | 48      | 46      | 36    | 50          | 39   | 46   | 48    | 55          | 70     | 48       | 51              | 60    | 61   |
|                                                    | IN-Cartoon | 52.6 | 53     | 51         | 50      | 44      | 36    | 50          | 38   | 49   | 49    | 56          | 77     | 52       | 56              | 64    | 63   |
|                                                    | IN-Drawing | 50.8 | 49     | 47         | 47      | 41      | 38    | 50          | 38   | 47   | 54    | 55          | 74     | 48       | 52              | 63    | 60   |
| LP-FT (Kumar et al., 2022)                         | IN-V2      | 52.3 | 51     | 49         | 49      | 47      | 37    | 51          | 39   | 51   | 53    | 59          | 71     | 52       | 53              | 61    | 63   |
|                                                    | IN-A       | 48.6 | 47     | 44         | 44      | 46      | 34    | 49          | 36   | 46   | 49    | 52          | 68     | 51       | 48              | 57    | 59   |
|                                                    | IN-R       | 46.6 | 44     | 42         | 41      | 41      | 39    | 45          | 33   | 43   | 48    | 51          | 63     | 48       | 48              | 55    | 56   |
|                                                    | IN-Sketch  | 47.9 | 47     | 46         | 46      | 41      | 32    | 45          | 37   | 46   | 48    | 52          | 66     | 51       | 48              | 56    | 57   |
|                                                    | ObjNet     | 46.6 | 45     | 42         | 42      | 44      | 33    | 47          | 34   | 43   | 44    | 51          | 66     | 44       | 48              | 56    | 58   |
|                                                    | IN-Cartoon | 47.2 | 47     | 45         | 44      | 38      | 31    | 44          | 32   | 44   | 44    | 50          | 73     | 48       | 50              | 61    | 57   |
|                                                    | IN-Drawing | 48.2 | 47     | 44         | 45      | 37      | 37    | 45          | 34   | 46   | 53    | 52          | 71     | 48       | 50              | 60    | 55   |
| WiSE-FT (Wortsman et al., 2022b)                   | IN-V2      | 55.0 | 55     | 53         | 53      | 48      | 39    | 52          | 42   | 53   | 55    | 61          | 74     | 56       | 56              | 64    | 65   |
|                                                    | IN-A       | 54.2 | 53     | 52         | 52      | 49      | 38    | 53          | 41   | 52   | 54    | 60          | 73     | 57       | 55              | 62    | 64   |
|                                                    | IN-R       | 55.3 | 54     | 52         | 52      | 49      | 43    | 52          | 42   | 53   | 57    | 61          | 72     | 57       | 56              | 63    | 64   |
|                                                    | IN-Sketch  | 53.6 | 54     | 53         | 53      | 45      | 37    | 49          | 42   | 52   | 55    | 58          | 72     | 56       | 54              | 62    | 63   |
|                                                    | ObjNet     | 53.5 | 54     | 52         | 52      | 48      | 37    | 52          | 41   | 50   | 51    | 59          | 72     | 53       | 55              | 63    | 64   |
|                                                    | IN-Cartoon | 52.9 | 54     | 52         | 51      | 45      | 35    | 49          | 37   | 50   | 50    | 57          | 76     | 55       | 56              | 64    | 63   |
|                                                    | IN-Drawing | 55.4 | 56     | 54         | 54      | 46      | 41    | 53          | 41   | 53   | 58    | 60          | 75     | 54       | 56              | 65    | 64   |
| Model Soup PRE-FT-EWC-LwF (Wortsman et al., 2022a) | IN-V2      | 55.1 | 54     | 53         | 52      | 49      | 39    | 53          | 42   | 53   | 55    | 61          | 74     | 56       | 56              | 64    | 65   |
|                                                    | IN-A       | 53.9 | 53     | 51         | 51      | 49      | 37    | 53          | 41   | 52   | 54    | 59          | 72     | 57       | 54              | 62    | 64   |
|                                                    | IN-R       | 55.2 | 53     | 52         | 52      | 49      | 44    | 53          | 42   | 52   | 57    | 61          | 72     | 57       | 56              | 63    | 64   |
|                                                    | IN-Sketch  | 53.6 | 54     | 52         | 52      | 46      | 37    | 49          | 42   | 52   | 54    | 58          | 72     | 56       | 54              | 62    | 63   |
|                                                    | ObjNet     | 53.5 | 54     | 51         | 51      | 49      | 37    | 53          | 41   | 50   | 51    | 59          | 72     | 53       | 54              | 62    | 64   |
|                                                    | IN-Cartoon | 52.7 | 53     | 51         | 51      | 45      | 35    | 49          | 38   | 49   | 50    | 57          | 75     | 54       | 55              | 64    | 63   |
|                                                    | IN-Drawing | 55.1 | 55     | 54         | 54      | 46      | 40    | 53          | 41   | 53   | 58    | 59          | 75     | 54       | 56              | 65    | 63   |



Table S31: Accuracy of ImageNet-21K with AugReg pretrained ViT-S/16 with different fine-tuning methods and downstream datasets on each ImageNet-C corruption For each corruption, accuracy is averaged across 5 levels of severity.

| Dataset                                            | Method     | Avg. | Gauss. | Noise Shot | Impulse | Defocus | Glass | Blur Motion | Zoom | Snow | Frost | Weather Fog | Bright | Contrast | Digital Elastic | Pixel | JPEG |
|----------------------------------------------------|------------|------|--------|------------|---------|---------|-------|-------------|------|------|-------|-------------|--------|----------|-----------------|-------|------|
| Pretrained                                         |            | 58.0 | 58     | 56         | 56      | 54      | 43    | 59          | 48   | 55   | 55    | 60          | 75     | 56       | 59              | 69    | 68   |
| FT                                                 | IN-V2      | 56.8 | 54     | 52         | 53      | 54      | 44    | 58          | 46   | 54   | 55    | 62          | 74     | 58       | 56              | 65    | 67   |
|                                                    | IN-A       | 52.7 | 49     | 47         | 48      | 51      | 39    | 55          | 43   | 51   | 50    | 57          | 69     | 54       | 51              | 63    | 64   |
|                                                    | IN-R       | 50.6 | 48     | 46         | 46      | 49      | 45    | 50          | 39   | 46   | 51    | 53          | 66     | 50       | 51              | 58    | 60   |
|                                                    | IN-Sketch  | 50.7 | 48     | 47         | 47      | 48      | 36    | 51          | 41   | 48   | 50    | 54          | 67     | 52       | 50              | 59    | 60   |
|                                                    | ObjNet     | 48.5 | 45     | 43         | 43      | 47      | 34    | 52          | 37   | 46   | 45    | 52          | 67     | 49       | 49              | 59    | 61   |
|                                                    | IN-Cartoon | 52.2 | 51     | 48         | 49      | 50      | 34    | 56          | 40   | 50   | 45    | 53          | 74     | 53       | 53              | 64    | 63   |
|                                                    | IN-Drawing | 52.8 | 46     | 43         | 44      | 50      | 41    | 55          | 42   | 51   | 57    | 57          | 73     | 53       | 54              | 64    | 61   |
| Linear Probing                                     | IN-V2      | 57.7 | 57     | 55         | 56      | 53      | 42    | 59          | 48   | 55   | 54    | 60          | 75     | 56       | 59              | 69    | 67   |
|                                                    | IN-A       | 57.2 | 56     | 54         | 55      | 53      | 42    | 59          | 47   | 55   | 54    | 60          | 74     | 57       | 58              | 68    | 66   |
|                                                    | IN-R       | 56.8 | 56     | 54         | 55      | 52      | 42    | 58          | 47   | 54   | 54    | 59          | 74     | 55       | 58              | 68    | 66   |
|                                                    | IN-Sketch  | 55.1 | 55     | 53         | 53      | 50      | 40    | 56          | 45   | 53   | 53    | 57          | 72     | 53       | 56              | 65    | 64   |
|                                                    | ObjNet     | 57.9 | 57     | 55         | 55      | 55      | 43    | 60          | 48   | 55   | 54    | 61          | 74     | 58       | 59              | 68    | 67   |
|                                                    | IN-Cartoon | 59.3 | 58     | 56         | 57      | 54      | 42    | 61          | 49   | 56   | 55    | 63          | 79     | 59       | 60              | 71    | 70   |
|                                                    | IN-Drawing | 60.0 | 59     | 57         | 58      | 55      | 44    | 61          | 48   | 58   | 60    | 64          | 77     | 58       | 61              | 71    | 69   |
| Visual Prompt (Bahng et al., 2017)                 | IN-V2      | 47.9 | 44     | 42         | 41      | 45      | 34    | 48          | 42   | 43   | 44    | 50          | 68     | 47       | 53              | 59    | 60   |
|                                                    | IN-A       | 39.6 | 34     | 32         | 30      | 38      | 26    | 41          | 34   | 36   | 35    | 43          | 59     | 40       | 44              | 49    | 54   |
|                                                    | IN-R       | 38.1 | 33     | 32         | 30      | 36      | 29    | 36          | 31   | 33   | 38    | 39          | 58     | 35       | 44              | 47    | 49   |
|                                                    | IN-Sketch  | 42.1 | 39     | 38         | 37      | 38      | 28    | 39          | 35   | 40   | 43    | 41          | 63     | 38       | 47              | 51    | 55   |
|                                                    | ObjNet     | 29.1 | 23     | 22         | 20      | 26      | 17    | 29          | 25   | 25   | 25    | 30          | 50     | 29       | 35              | 37    | 43   |
|                                                    | IN-Cartoon | 39.7 | 35     | 33         | 32      | 37      | 24    | 40          | 34   | 35   | 32    | 38          | 64     | 37       | 47              | 56    | 53   |
|                                                    | IN-Drawing | 41.0 | 40     | 39         | 38      | 35      | 29    | 37          | 32   | 36   | 44    | 40          | 62     | 31       | 46              | 54    | 52   |
| LoRA (Hu et al., 2021)                             | IN-V2      | 58.2 | 58     | 56         | 56      | 54      | 43    | 60          | 48   | 56   | 55    | 61          | 76     | 56       | 59              | 69    | 68   |
|                                                    | IN-A       | 58.9 | 58     | 56         | 56      | 56      | 44    | 61          | 49   | 56   | 55    | 62          | 76     | 59       | 60              | 69    | 68   |
|                                                    | IN-R       | 58.2 | 58     | 56         | 56      | 54      | 43    | 60          | 48   | 56   | 55    | 60          | 75     | 56       | 59              | 69    | 68   |
|                                                    | IN-Sketch  | 58.3 | 58     | 56         | 57      | 54      | 42    | 60          | 48   | 56   | 55    | 61          | 75     | 57       | 59              | 69    | 68   |
|                                                    | ObjNet     | 58.8 | 58     | 56         | 56      | 56      | 43    | 61          | 49   | 56   | 55    | 62          | 76     | 59       | 60              | 69    | 68   |
|                                                    | IN-Cartoon | 57.7 | 57     | 55         | 56      | 53      | 42    | 59          | 47   | 55   | 54    | 60          | 75     | 57       | 59              | 69    | 68   |
|                                                    | IN-Drawing | 59.0 | 58     | 57         | 57      | 55      | 43    | 60          | 48   | 57   | 59    | 62          | 76     | 58       | 60              | 69    | 68   |
| EWC (Kirkpatrick et al., 2017)                     | IN-V2      | 59.7 | 58     | 56         | 57      | 56      | 44    | 61          | 49   | 58   | 57    | 64          | 77     | 59       | 60              | 70    | 69   |
|                                                    | IN-A       | 58.0 | 56     | 54         | 54      | 56      | 42    | 60          | 48   | 56   | 55    | 62          | 74     | 59       | 56              | 68    | 68   |
|                                                    | IN-R       | 56.4 | 54     | 51         | 51      | 56      | 47    | 57          | 45   | 53   | 57    | 59          | 73     | 56       | 57              | 63    | 66   |
|                                                    | IN-Sketch  | 58.0 | 57     | 55         | 55      | 55      | 42    | 59          | 49   | 56   | 57    | 62          | 74     | 58       | 58              | 67    | 67   |
|                                                    | ObjNet     | 56.7 | 56     | 53         | 54      | 55      | 41    | 59          | 47   | 54   | 52    | 60          | 73     | 57       | 55              | 67    | 68   |
|                                                    | IN-Cartoon | 55.2 | 53     | 50         | 52      | 52      | 38    | 58          | 44   | 53   | 50    | 59          | 74     | 57       | 56              | 67    | 65   |
|                                                    | IN-Drawing | 58.1 | 56     | 55         | 55      | 53      | 43    | 59          | 46   | 56   | 60    | 63          | 75     | 58       | 58              | 67    | 66   |
| LwF (Li & Hoiem, 2017)                             | IN-V2      | 58.3 | 57     | 55         | 56      | 54      | 44    | 60          | 47   | 57   | 55    | 62          | 75     | 58       | 58              | 68    | 68   |
|                                                    | IN-A       | 57.8 | 56     | 54         | 55      | 54      | 44    | 59          | 47   | 56   | 55    | 61          | 75     | 57       | 58              | 68    | 67   |
|                                                    | IN-R       | 57.2 | 56     | 54         | 54      | 53      | 47    | 58          | 46   | 54   | 56    | 60          | 73     | 55       | 58              | 66    | 66   |
|                                                    | IN-Sketch  | 54.5 | 53     | 51         | 52      | 51      | 38    | 55          | 44   | 53   | 52    | 58          | 71     | 55       | 54              | 64    | 64   |
|                                                    | ObjNet     | 55.1 | 53     | 50         | 50      | 53      | 40    | 58          | 44   | 53   | 51    | 58          | 73     | 55       | 56              | 66    | 66   |
|                                                    | IN-Cartoon | 60.0 | 59     | 57         | 57      | 56      | 44    | 62          | 48   | 57   | 55    | 62          | 81     | 60       | 62              | 72    | 70   |
|                                                    | IN-Drawing | 57.8 | 55     | 52         | 53      | 54      | 44    | 60          | 46   | 55   | 59    | 60          | 78     | 55       | 58              | 71    | 68   |
| LP-FT (Kumar et al., 2022)                         | IN-V2      | 57.6 | 56     | 53         | 54      | 54      | 44    | 59          | 47   | 56   | 55    | 62          | 74     | 58       | 57              | 67    | 67   |
|                                                    | IN-A       | 56.0 | 53     | 51         | 52      | 53      | 42    | 58          | 46   | 54   | 54    | 60          | 72     | 58       | 55              | 66    | 65   |
|                                                    | IN-R       | 53.5 | 51     | 49         | 49      | 51      | 46    | 54          | 42   | 50   | 54    | 56          | 69     | 53       | 55              | 62    | 62   |
|                                                    | IN-Sketch  | 52.3 | 51     | 49         | 50      | 48      | 37    | 53          | 42   | 51   | 51    | 55          | 69     | 53       | 52              | 62    | 62   |
|                                                    | ObjNet     | 53.4 | 52     | 50         | 49      | 51      | 37    | 56          | 43   | 51   | 50    | 57          | 71     | 53       | 53              | 64    | 64   |
|                                                    | IN-Cartoon | 56.0 | 55     | 52         | 53      | 52      | 38    | 59          | 44   | 54   | 50    | 57          | 77     | 57       | 57              | 68    | 66   |
|                                                    | IN-Drawing | 55.5 | 50     | 48         | 49      | 52      | 43    | 58          | 43   | 54   | 58    | 60          | 75     | 55       | 56              | 68    | 63   |
| WiSE-FT (Wortsman et al., 2022b)                   | IN-V2      | 59.3 | 58     | 56         | 57      | 55      | 44    | 61          | 49   | 58   | 57    | 63          | 76     | 59       | 60              | 69    | 69   |
|                                                    | IN-A       | 58.9 | 57     | 55         | 56      | 55      | 44    | 61          | 49   | 57   | 56    | 63          | 75     | 59       | 59              | 69    | 68   |
|                                                    | IN-R       | 59.6 | 58     | 56         | 56      | 56      | 49    | 60          | 49   | 57   | 59    | 63          | 75     | 59       | 60              | 68    | 68   |
|                                                    | IN-Sketch  | 58.0 | 57     | 55         | 56      | 54      | 42    | 58          | 47   | 57   | 57    | 61          | 74     | 59       | 58              | 67    | 67   |
|                                                    | ObjNet     | 57.6 | 56     | 54         | 55      | 54      | 42    | 60          | 47   | 56   | 54    | 61          | 75     | 57       | 58              | 68    | 67   |
|                                                    | IN-Cartoon | 58.4 | 58     | 55         | 56      | 55      | 40    | 61          | 46   | 57   | 53    | 61          | 78     | 58       | 60              | 70    | 68   |
|                                                    | IN-Drawing | 60.4 | 59     | 57         | 58      | 56      | 45    | 62          | 49   | 59   | 61    | 64          | 78     | 59       | 61              | 71    | 69   |
| Model Soup PRE-FT-EWC-LwF (Wortsman et al., 2022a) | IN-V2      | 59.3 | 58     | 56         | 57      | 55      | 45    | 61          | 49   | 58   | 57    | 63          | 76     | 59       | 60              | 69    | 69   |
|                                                    | IN-A       | 58.9 | 57     | 55         | 56      | 56      | 44    | 61          | 49   | 57   | 56    | 63          | 75     | 59       | 59              | 69    | 68   |
|                                                    | IN-R       | 59.4 | 58     | 56         | 56      | 56      | 49    | 60          | 49   | 57   | 59    | 63          | 75     | 59       | 60              | 68    | 68   |
|                                                    | IN-Sketch  | 57.9 | 57     | 55         | 56      | 54      | 41    | 58          | 48   | 56   | 56    | 61          | 74     | 59       | 58              | 67    | 67   |
|                                                    | ObjNet     | 57.6 | 56     | 54         | 54      | 55      | 42    | 60          | 47   | 56   | 54    | 61          | 75     | 57       | 58              | 68    | 67   |
|                                                    | IN-Cartoon | 58.6 | 58     | 55         | 56      | 55      | 41    | 61          | 47   | 56   | 53    | 61          | 78     | 59       | 60              | 70    | 69   |
|                                                    | IN-Drawing | 60.2 | 59     | 57         | 58      | 56      | 44    | 62          | 49   | 58   | 61    | 63          | 78     | 59       | 60              | 71    | 69   |

Table S32: Accuracy of ImageNet-21K with AugReg pretrained ViT-S/32 with different fine-tuning methods and downstream datasets on each ImageNet-C corruption. For each corruption, accuracy is averaged across 5 levels of severity.

| Dataset                                            | Method     | Avg. | Gauss. | Noise Shot | Impulse | Defocus | Glass | Blur Motion | Zoom | Snow | Frost | Weather Fog | Bright | Contrast | Digital Elastic | Pixel | JPEG |
|----------------------------------------------------|------------|------|--------|------------|---------|---------|-------|-------------|------|------|-------|-------------|--------|----------|-----------------|-------|------|
| Pretrained                                         |            | 52.0 | 54     | 53         | 53      | 47      | 40    | 51          | 39   | 43   | 47    | 50          | 69     | 48       | 56              | 65    | 64   |
| FT                                                 | IN-V2      | 50.1 | 49     | 47         | 47      | 47      | 40    | 50          | 40   | 43   | 47    | 51          | 66     | 47       | 52              | 62    | 62   |
|                                                    | IN-A       | 44.0 | 43     | 41         | 41      | 44      | 37    | 46          | 34   | 34   | 39    | 43          | 59     | 42       | 44              | 56    | 56   |
|                                                    | IN-R       | 43.4 | 42     | 41         | 40      | 42      | 40    | 42          | 31   | 36   | 43    | 44          | 57     | 42       | 45              | 53    | 54   |
|                                                    | IN-Sketch  | 45.5 | 46     | 45         | 45      | 43      | 34    | 45          | 35   | 39   | 43    | 45          | 60     | 44       | 46              | 56    | 56   |
|                                                    | ObjNet     | 41.7 | 40     | 39         | 38      | 41      | 33    | 43          | 31   | 32   | 37    | 39          | 58     | 41       | 44              | 55    | 55   |
|                                                    | IN-Cartoon | 45.2 | 46     | 44         | 43      | 41      | 30    | 45          | 31   | 38   | 38    | 41          | 68     | 44       | 48              | 63    | 57   |
|                                                    | IN-Drawing | 46.9 | 48     | 45         | 45      | 42      | 37    | 45          | 32   | 41   | 50    | 44          | 65     | 43       | 49              | 60    | 55   |
| Linear Probing                                     | IN-V2      | 51.5 | 54     | 52         | 52      | 47      | 40    | 51          | 39   | 42   | 47    | 49          | 68     | 48       | 55              | 65    | 63   |
|                                                    | IN-A       | 50.4 | 52     | 51         | 51      | 46      | 39    | 50          | 38   | 41   | 46    | 48          | 66     | 48       | 54              | 63    | 61   |
|                                                    | IN-R       | 51.5 | 52     | 51         | 51      | 48      | 41    | 52          | 40   | 42   | 47    | 51          | 68     | 49       | 55              | 64    | 63   |
|                                                    | IN-Sketch  | 49.6 | 50     | 49         | 49      | 46      | 39    | 50          | 38   | 41   | 45    | 49          | 65     | 48       | 53              | 61    | 60   |
|                                                    | ObjNet     | 52.1 | 53     | 52         | 52      | 49      | 41    | 53          | 41   | 42   | 47    | 51          | 68     | 50       | 55              | 64    | 63   |
|                                                    | IN-Cartoon | 53.5 | 55     | 54         | 54      | 49      | 41    | 53          | 41   | 43   | 47    | 52          | 73     | 51       | 57              | 68    | 66   |
|                                                    | IN-Drawing | 53.6 | 55     | 54         | 54      | 48      | 42    | 52          | 40   | 45   | 52    | 52          | 71     | 49       | 58              | 66    | 65   |
| Visual Prompt (Bahng et al., 2022)                 | IN-V2      | 42.6 | 43     | 42         | 41      | 38      | 32    | 41          | 35   | 33   | 37    | 39          | 60     | 39       | 49              | 54    | 55   |
|                                                    | IN-A       | 23.2 | 18     | 17         | 16      | 21      | 17    | 23          | 18   | 16   | 20    | 25          | 38     | 22       | 30              | 32    | 34   |
|                                                    | IN-R       | 32.3 | 31     | 31         | 29      | 30      | 25    | 29          | 25   | 25   | 32    | 25          | 51     | 23       | 38              | 42    | 46   |
|                                                    | IN-Sketch  | 35.1 | 36     | 35         | 34      | 31      | 23    | 30          | 25   | 28   | 34    | 30          | 54     | 30       | 40              | 46    | 49   |
|                                                    | ObjNet     | 24.5 | 21     | 20         | 19      | 22      | 18    | 23          | 20   | 17   | 21    | 19          | 42     | 18       | 33              | 36    | 38   |
|                                                    | IN-Cartoon | 36.0 | 37     | 35         | 34      | 32      | 23    | 33          | 27   | 27   | 30    | 28          | 58     | 27       | 44              | 53    | 52   |
|                                                    | IN-Drawing | 36.6 | 40     | 39         | 39      | 29      | 28    | 31          | 26   | 28   | 39    | 27          | 55     | 27       | 42              | 49    | 48   |
| LoRA (Hu et al., 2021)                             | IN-V2      | 52.1 | 54     | 53         | 53      | 47      | 41    | 51          | 39   | 43   | 47    | 50          | 69     | 48       | 56              | 66    | 64   |
|                                                    | IN-A       | 53.1 | 54     | 53         | 53      | 50      | 42    | 54          | 41   | 43   | 48    | 52          | 70     | 52       | 56              | 66    | 64   |
|                                                    | IN-R       | 52.8 | 54     | 52         | 53      | 49      | 42    | 54          | 41   | 42   | 48    | 52          | 70     | 50       | 56              | 66    | 64   |
|                                                    | IN-Sketch  | 52.9 | 54     | 52         | 52      | 50      | 42    | 53          | 41   | 44   | 48    | 52          | 69     | 51       | 56              | 65    | 64   |
|                                                    | ObjNet     | 53.3 | 54     | 53         | 53      | 50      | 42    | 54          | 42   | 43   | 48    | 53          | 70     | 51       | 57              | 66    | 64   |
|                                                    | IN-Cartoon | 51.4 | 53     | 52         | 52      | 47      | 41    | 51          | 39   | 42   | 47    | 48          | 69     | 46       | 55              | 65    | 64   |
|                                                    | IN-Drawing | 52.3 | 54     | 53         | 52      | 47      | 41    | 51          | 39   | 45   | 51    | 51          | 69     | 48       | 56              | 64    | 63   |
| EWC (Kirkpatrick et al., 2017)                     | IN-V2      | 53.6 | 54     | 53         | 53      | 50      | 42    | 54          | 42   | 45   | 49    | 53          | 70     | 50       | 57              | 66    | 65   |
|                                                    | IN-A       | 50.2 | 49     | 48         | 47      | 50      | 42    | 53          | 40   | 41   | 45    | 49          | 66     | 49       | 51              | 61    | 62   |
|                                                    | IN-R       | 50.7 | 50     | 49         | 48      | 49      | 45    | 51          | 38   | 43   | 49    | 50          | 66     | 49       | 53              | 58    | 61   |
|                                                    | IN-Sketch  | 52.6 | 53     | 52         | 52      | 49      | 41    | 52          | 41   | 45   | 50    | 53          | 68     | 51       | 55              | 64    | 63   |
|                                                    | ObjNet     | 50.7 | 51     | 50         | 50      | 49      | 41    | 53          | 39   | 42   | 45    | 48          | 66     | 48       | 53              | 63    | 63   |
|                                                    | IN-Cartoon | 48.8 | 50     | 48         | 48      | 44      | 35    | 49          | 35   | 40   | 43    | 47          | 68     | 47       | 52              | 64    | 61   |
|                                                    | IN-Drawing | 52.3 | 53     | 52         | 52      | 46      | 41    | 52          | 37   | 46   | 54    | 52          | 68     | 50       | 55              | 64    | 62   |
| LwF (Li & Hoiem, 2017)                             | IN-V2      | 51.8 | 53     | 51         | 51      | 47      | 41    | 51          | 40   | 44   | 48    | 51          | 68     | 48       | 55              | 65    | 64   |
|                                                    | IN-A       | 50.8 | 51     | 50         | 50      | 47      | 40    | 52          | 40   | 41   | 46    | 50          | 67     | 48       | 53              | 64    | 63   |
|                                                    | IN-R       | 50.9 | 51     | 50         | 49      | 47      | 43    | 50          | 38   | 43   | 49    | 51          | 66     | 48       | 54              | 63    | 62   |
|                                                    | IN-Sketch  | 48.9 | 51     | 50         | 49      | 45      | 37    | 49          | 39   | 41   | 46    | 47          | 64     | 46       | 51              | 61    | 60   |
|                                                    | ObjNet     | 48.2 | 48     | 46         | 46      | 47      | 37    | 49          | 37   | 38   | 43    | 47          | 65     | 46       | 50              | 61    | 61   |
|                                                    | IN-Cartoon | 53.7 | 55     | 53         | 53      | 49      | 41    | 54          | 39   | 44   | 48    | 50          | 74     | 50       | 58              | 70    | 67   |
|                                                    | IN-Drawing | 52.1 | 54     | 51         | 51      | 48      | 41    | 52          | 38   | 44   | 53    | 48          | 71     | 45       | 54              | 67    | 64   |
| LP-FT (Kumar et al., 2022)                         | IN-V2      | 50.7 | 51     | 49         | 49      | 47      | 40    | 50          | 40   | 43   | 47    | 50          | 67     | 48       | 53              | 63    | 62   |
|                                                    | IN-A       | 48.2 | 48     | 46         | 46      | 46      | 39    | 49          | 38   | 40   | 44    | 48          | 64     | 47       | 49              | 60    | 59   |
|                                                    | IN-R       | 47.5 | 46     | 45         | 44      | 45      | 42    | 47          | 35   | 40   | 46    | 47          | 63     | 45       | 50              | 58    | 57   |
|                                                    | IN-Sketch  | 46.9 | 48     | 47         | 46      | 44      | 36    | 47          | 37   | 40   | 44    | 46          | 61     | 45       | 48              | 58    | 57   |
|                                                    | ObjNet     | 47.0 | 47     | 45         | 45      | 46      | 36    | 49          | 37   | 37   | 42    | 45          | 63     | 45       | 49              | 60    | 60   |
|                                                    | IN-Cartoon | 50.1 | 51     | 49         | 48      | 46      | 35    | 51          | 36   | 41   | 43    | 47          | 72     | 48       | 53              | 68    | 62   |
|                                                    | IN-Drawing | 50.3 | 52     | 50         | 50      | 45      | 40    | 49          | 35   | 44   | 52    | 47          | 68     | 45       | 52              | 64    | 60   |
| WiSE-FT (Wortsman et al., 2022b)                   | IN-V2      | 53.1 | 54     | 52         | 52      | 49      | 42    | 53          | 41   | 45   | 49    | 53          | 70     | 50       | 56              | 66    | 65   |
|                                                    | IN-A       | 52.8 | 53     | 52         | 52      | 50      | 42    | 54          | 41   | 44   | 49    | 53          | 69     | 50       | 55              | 65    | 64   |
|                                                    | IN-R       | 53.3 | 53     | 52         | 52      | 50      | 45    | 53          | 40   | 46   | 51    | 54          | 69     | 51       | 56              | 64    | 64   |
|                                                    | IN-Sketch  | 52.1 | 54     | 53         | 53      | 48      | 40    | 51          | 40   | 45   | 49    | 51          | 68     | 50       | 54              | 64    | 63   |
|                                                    | ObjNet     | 51.8 | 52     | 51         | 51      | 48      | 40    | 52          | 40   | 43   | 47    | 51          | 68     | 49       | 55              | 65    | 64   |
|                                                    | IN-Cartoon | 51.8 | 53     | 52         | 51      | 47      | 37    | 52          | 37   | 43   | 46    | 50          | 72     | 50       | 55              | 68    | 64   |
|                                                    | IN-Drawing | 54.3 | 57     | 55         | 55      | 48      | 42    | 54          | 39   | 47   | 54    | 53          | 72     | 51       | 57              | 68    | 65   |
| Model Soup PRE-FT-EWC-LwF (Wortsman et al., 2022a) | IN-V2      | 53.1 | 54     | 52         | 52      | 49      | 42    | 53          | 41   | 45   | 49    | 52          | 70     | 50       | 56              | 66    | 65   |
|                                                    | IN-A       | 52.5 | 53     | 51         | 51      | 50      | 42    | 54          | 41   | 44   | 48    | 52          | 68     | 50       | 55              | 65    | 64   |
|                                                    | IN-R       | 53.2 | 53     | 52         | 52      | 50      | 45    | 53          | 40   | 45   | 51    | 54          | 69     | 51       | 56              | 64    | 64   |
|                                                    | IN-Sketch  | 52.2 | 54     | 53         | 53      | 48      | 40    | 51          | 40   | 45   | 49    | 51          | 68     | 50       | 54              | 64    | 63   |
|                                                    | ObjNet     | 51.7 | 52     | 51         | 51      | 49      | 40    | 53          | 40   | 43   | 47    | 50          | 68     | 49       | 54              | 65    | 64   |
|                                                    | IN-Cartoon | 52.0 | 54     | 52         | 52      | 47      | 38    | 52          | 37   | 43   | 46    | 50          | 72     | 50       | 55              | 68    | 64   |
|                                                    | IN-Drawing | 54.2 | 57     | 55         | 55      | 48      | 42    | 53          | 39   | 47   | 54    | 52          | 72     | 50       | 57              | 68    | 65   |

Table S33: Accuracy of ImageNet-21K with AugReg pretrained ViT-L/16 with different fine-tuning methods and downstream datasets on each ImageNet-C corruption For each corruption, accuracy is averaged across 5 levels of severity.

| Dataset                                            | Method     | Avg. | Gauss. | Noise Shot | Impulse | Defocus | Glass | Blur Motion | Zoom | Snow | Frost | Weather Fog | Bright | Contrast | Digital Elastic | Pixel | JPEG |
|----------------------------------------------------|------------|------|--------|------------|---------|---------|-------|-------------|------|------|-------|-------------|--------|----------|-----------------|-------|------|
| Pretrained                                         |            | 72.2 | 73     | 73         | 73      | 69      | 62    | 73          | 67   | 72   | 69    | 73          | 82     | 70       | 71              | 79    | 78   |
| FT                                                 | IN-V2      | 71.0 | 72     | 71         | 72      | 67      | 62    | 71          | 64   | 70   | 70    | 72          | 81     | 69       | 69              | 79    | 78   |
|                                                    | IN-A       | 70.4 | 72     | 71         | 71      | 67      | 61    | 71          | 64   | 70   | 69    | 71          | 80     | 68       | 68              | 78    | 77   |
|                                                    | IN-R       | 65.4 | 68     | 67         | 67      | 61      | 61    | 64          | 55   | 61   | 64    | 65          | 76     | 60       | 64              | 74    | 74   |
|                                                    | IN-Sketch  | 67.6 | 69     | 68         | 68      | 65      | 58    | 67          | 61   | 67   | 66    | 68          | 78     | 64       | 65              | 75    | 74   |
|                                                    | ObjNet     | 68.4 | 70     | 69         | 69      | 65      | 60    | 68          | 59   | 68   | 67    | 67          | 79     | 63       | 67              | 78    | 77   |
|                                                    | IN-Cartoon | 72.6 | 74     | 72         | 73      | 67      | 59    | 73          | 63   | 73   | 70    | 73          | 89     | 68       | 72              | 83    | 81   |
|                                                    | IN-Drawing | 74.7 | 77     | 75         | 76      | 69      | 67    | 74          | 63   | 74   | 77    | 75          | 87     | 67       | 73              | 85    | 81   |
| Linear Probing                                     | IN-V2      | 71.4 | 72     | 72         | 71      | 68      | 61    | 72          | 66   | 72   | 69    | 72          | 81     | 69       | 70              | 78    | 77   |
|                                                    | IN-A       | 71.4 | 72     | 72         | 71      | 68      | 61    | 72          | 66   | 71   | 69    | 72          | 81     | 70       | 70              | 78    | 77   |
|                                                    | IN-R       | 69.8 | 70     | 70         | 69      | 67      | 60    | 70          | 64   | 70   | 67    | 71          | 80     | 68       | 69              | 77    | 76   |
|                                                    | IN-Sketch  | 68.4 | 69     | 68         | 68      | 66      | 59    | 69          | 63   | 68   | 66    | 69          | 78     | 66       | 67              | 75    | 74   |
|                                                    | ObjNet     | 71.5 | 72     | 71         | 71      | 69      | 62    | 72          | 66   | 71   | 68    | 73          | 81     | 70       | 70              | 78    | 77   |
|                                                    | IN-Cartoon | 76.5 | 77     | 76         | 76      | 73      | 65    | 77          | 71   | 76   | 72    | 77          | 88     | 75       | 75              | 85    | 83   |
|                                                    | IN-Drawing | 76.0 | 77     | 76         | 76      | 73      | 66    | 76          | 70   | 76   | 75    | 77          | 86     | 74       | 75              | 83    | 81   |
| Visual Prompt (Bahng et al., 2022)                 | IN-V2      | 57.4 | 52     | 51         | 50      | 53      | 44    | 56          | 54   | 56   | 56    | 62          | 75     | 55       | 61              | 70    | 69   |
|                                                    | IN-A       | 50.5 | 42     | 41         | 39      | 45      | 36    | 50          | 48   | 50   | 49    | 56          | 71     | 48       | 55              | 65    | 63   |
|                                                    | IN-R       | 50.3 | 47     | 47         | 45      | 45      | 38    | 47          | 45   | 48   | 51    | 51          | 69     | 45       | 53              | 62    | 62   |
|                                                    | IN-Sketch  | 48.6 | 46     | 45         | 43      | 42      | 38    | 44          | 43   | 46   | 49    | 48          | 67     | 39       | 52              | 63    | 62   |
|                                                    | ObjNet     | 47.7 | 38     | 37         | 35      | 43      | 32    | 46          | 44   | 47   | 46    | 53          | 70     | 45       | 53              | 63    | 62   |
|                                                    | IN-Cartoon | 55.8 | 50     | 49         | 48      | 51      | 42    | 54          | 52   | 55   | 53    | 57          | 75     | 51       | 60              | 71    | 68   |
|                                                    | IN-Drawing | 52.2 | 50     | 49         | 48      | 47      | 43    | 48          | 45   | 49   | 55    | 51          | 70     | 43       | 56              | 66    | 64   |
| LoRA (Hu et al., 2021)                             | IN-V2      | 72.3 | 73     | 73         | 73      | 69      | 62    | 73          | 67   | 72   | 70    | 73          | 82     | 70       | 71              | 79    | 78   |
|                                                    | IN-A       | 72.9 | 73     | 73         | 73      | 71      | 63    | 74          | 68   | 72   | 70    | 75          | 82     | 71       | 72              | 79    | 78   |
|                                                    | IN-R       | 72.6 | 73     | 73         | 73      | 70      | 63    | 73          | 67   | 72   | 69    | 74          | 82     | 70       | 72              | 79    | 78   |
|                                                    | IN-Sketch  | 72.5 | 74     | 73         | 73      | 70      | 63    | 73          | 67   | 72   | 70    | 74          | 82     | 69       | 72              | 79    | 78   |
|                                                    | ObjNet     | 72.9 | 73     | 73         | 73      | 71      | 64    | 74          | 68   | 73   | 70    | 75          | 82     | 71       | 72              | 80    | 78   |
|                                                    | IN-Cartoon | 72.5 | 73     | 73         | 72      | 70      | 63    | 73          | 67   | 72   | 69    | 74          | 82     | 69       | 71              | 79    | 78   |
|                                                    | IN-Drawing | 73.0 | 74     | 73         | 73      | 71      | 64    | 74          | 68   | 73   | 71    | 74          | 82     | 71       | 72              | 79    | 78   |
| EWC (Kirkpatrick et al., 2017)                     | IN-V2      | 71.0 | 74     | 74         | 74      | 65      | 64    | 70          | 63   | 68   | 69    | 68          | 81     | 66       | 70              | 80    | 78   |
|                                                    | IN-A       | 72.0 | 73     | 72         | 72      | 68      | 63    | 73          | 66   | 72   | 69    | 73          | 82     | 70       | 70              | 80    | 78   |
|                                                    | IN-R       | 72.0 | 72     | 71         | 71      | 70      | 65    | 72          | 65   | 72   | 71    | 73          | 82     | 70       | 70              | 78    | 78   |
|                                                    | IN-Sketch  | 72.4 | 73     | 73         | 72      | 70      | 63    | 72          | 67   | 72   | 71    | 73          | 82     | 70       | 71              | 79    | 78   |
|                                                    | ObjNet     | 71.2 | 72     | 71         | 70      | 68      | 62    | 72          | 63   | 72   | 70    | 72          | 81     | 70       | 69              | 79    | 78   |
|                                                    | IN-Cartoon | 71.8 | 72     | 71         | 71      | 69      | 60    | 73          | 66   | 72   | 68    | 73          | 83     | 70       | 71              | 79    | 78   |
|                                                    | IN-Drawing | 73.5 | 75     | 74         | 74      | 70      | 63    | 74          | 66   | 74   | 74    | 75          | 83     | 72       | 72              | 80    | 78   |
| LwF (Li & Hoiem, 2017)                             | IN-V2      | 71.3 | 74     | 74         | 74      | 66      | 63    | 71          | 65   | 69   | 68    | 71          | 81     | 66       | 71              | 79    | 78   |
|                                                    | IN-A       | 72.0 | 74     | 73         | 73      | 68      | 63    | 72          | 66   | 72   | 69    | 72          | 82     | 68       | 71              | 79    | 78   |
|                                                    | IN-R       | 71.4 | 73     | 72         | 72      | 67      | 64    | 71          | 64   | 70   | 70    | 72          | 81     | 67       | 71              | 78    | 78   |
|                                                    | IN-Sketch  | 70.2 | 71     | 71         | 71      | 67      | 61    | 70          | 64   | 70   | 68    | 70          | 80     | 67       | 69              | 77    | 77   |
|                                                    | ObjNet     | 71.5 | 73     | 72         | 72      | 68      | 62    | 72          | 65   | 71   | 69    | 72          | 82     | 68       | 70              | 79    | 78   |
|                                                    | IN-Cartoon | 75.5 | 79     | 78         | 78      | 70      | 66    | 75          | 65   | 73   | 72    | 71          | 91     | 61       | 78              | 89    | 86   |
|                                                    | IN-Drawing | 76.6 | 79     | 77         | 78      | 69      | 71    | 75          | 66   | 76   | 79    | 73          | 90     | 69       | 77              | 88    | 84   |
| LP-FT (Kumar et al., 2022)                         | IN-V2      | 71.4 | 73     | 73         | 72      | 67      | 62    | 71          | 65   | 72   | 70    | 71          | 81     | 67       | 70              | 79    | 78   |
|                                                    | IN-A       | 53.7 | 56     | 55         | 55      | 49      | 46    | 53          | 46   | 52   | 50    | 54          | 63     | 51       | 52              | 63    | 62   |
|                                                    | IN-R       | 49.4 | 51     | 51         | 50      | 46      | 44    | 48          | 39   | 47   | 49    | 49          | 59     | 45       | 48              | 58    | 57   |
|                                                    | IN-Sketch  | 67.8 | 68     | 68         | 68      | 66      | 58    | 68          | 62   | 67   | 66    | 68          | 77     | 65       | 66              | 75    | 74   |
|                                                    | ObjNet     | 70.6 | 71     | 70         | 70      | 68      | 61    | 71          | 63   | 70   | 68    | 72          | 80     | 68       | 69              | 78    | 76   |
|                                                    | IN-Cartoon | 77.0 | 78     | 77         | 77      | 72      | 64    | 77          | 69   | 77   | 74    | 78          | 90     | 74       | 76              | 86    | 85   |
|                                                    | IN-Drawing | 77.5 | 80     | 79         | 79      | 73      | 68    | 77          | 69   | 78   | 78    | 78          | 88     | 70       | 76              | 86    | 83   |
| WiSE-FT (Wortsman et al., 2022b)                   | IN-V2      | 73.5 | 74     | 74         | 74      | 71      | 64    | 74          | 68   | 74   | 72    | 75          | 83     | 72       | 72              | 80    | 79   |
|                                                    | IN-A       | 71.5 | 73     | 72         | 72      | 67      | 62    | 72          | 66   | 72   | 69    | 72          | 81     | 69       | 70              | 78    | 77   |
|                                                    | IN-R       | 73.0 | 74     | 74         | 73      | 70      | 66    | 73          | 65   | 72   | 72    | 74          | 82     | 70       | 72              | 80    | 79   |
|                                                    | IN-Sketch  | 72.1 | 73     | 73         | 73      | 69      | 62    | 72          | 66   | 72   | 71    | 73          | 82     | 69       | 71              | 79    | 78   |
|                                                    | ObjNet     | 72.6 | 74     | 73         | 73      | 70      | 63    | 73          | 66   | 73   | 71    | 73          | 82     | 70       | 72              | 80    | 78   |
|                                                    | IN-Cartoon | 75.6 | 77     | 76         | 76      | 72      | 63    | 76          | 69   | 76   | 72    | 77          | 87     | 73       | 74              | 83    | 82   |
|                                                    | IN-Drawing | 76.8 | 78     | 77         | 78      | 73      | 67    | 77          | 69   | 77   | 77    | 77          | 87     | 73       | 75              | 84    | 82   |
| Model Soup PRE-FT-EWC-LwF (Wortsman et al., 2022a) | IN-V2      | 73.4 | 75     | 75         | 74      | 69      | 64    | 74          | 67   | 73   | 72    | 74          | 83     | 71       | 72              | 80    | 79   |
|                                                    | IN-A       | 72.7 | 74     | 73         | 73      | 69      | 63    | 73          | 67   | 73   | 70    | 73          | 82     | 71       | 71              | 79    | 78   |
|                                                    | IN-R       | 73.3 | 74     | 74         | 74      | 70      | 67    | 73          | 66   | 72   | 72    | 74          | 82     | 71       | 72              | 80    | 79   |
|                                                    | IN-Sketch  | 72.3 | 73     | 73         | 73      | 69      | 63    | 72          | 66   | 73   | 71    | 73          | 82     | 70       | 71              | 79    | 78   |
|                                                    | ObjNet     | 72.7 | 74     | 73         | 73      | 70      | 63    | 73          | 66   | 73   | 71    | 74          | 82     | 70       | 71              | 79    | 78   |
|                                                    | IN-Cartoon | 75.8 | 77     | 76         | 76      | 73      | 64    | 76          | 69   | 76   | 72    | 77          | 88     | 72       | 75              | 84    | 83   |
|                                                    | IN-Drawing | 77.4 | 79     | 79         | 79      | 74      | 68    | 78          | 69   | 77   | 77    | 78          | 87     | 73       | 76              | 85    | 83   |

Table S34: Accuracy of ImageNet-1K pretrained ResNet-50 with different fine-tuning methods and downstream datasets on each ImageNet-C corruption For each corruption, accuracy is averaged across 5 levels of severity.

| Dataset                                            | Method     | Avg. | Gauss. | Noise Shot | Impulse | Defocus | Glass | Blur Motion | Zoom | Snow | Frost | Weather Fog | Bright | Contrast | Digital Elastic | Pixel | JPEG |
|----------------------------------------------------|------------|------|--------|------------|---------|---------|-------|-------------|------|------|-------|-------------|--------|----------|-----------------|-------|------|
| Pretrained                                         |            | 31.7 | 23     | 21         | 18      | 28      | 23    | 30          | 30   | 24   | 28    | 34          | 59     | 31       | 40              | 42    | 46   |
| FT                                                 | IN-V2      | 29.9 | 21     | 20         | 16      | 26      | 22    | 27          | 26   | 25   | 28    | 31          | 56     | 27       | 37              | 41    | 46   |
|                                                    | IN-A       | 19.9 | 13     | 13         | 10      | 16      | 14    | 17          | 14   | 16   | 18    | 23          | 39     | 20       | 24              | 30    | 31   |
|                                                    | IN-R       | 25.6 | 21     | 21         | 17      | 20      | 21    | 22          | 20   | 21   | 26    | 26          | 45     | 22       | 30              | 35    | 37   |
|                                                    | IN-Sketch  | 19.2 | 16     | 15         | 13      | 11      | 12    | 14          | 12   | 17   | 22    | 20          | 37     | 18       | 21              | 28    | 32   |
|                                                    | ObjNet     | 20.8 | 14     | 14         | 11      | 17      | 12    | 21          | 21   | 15   | 18    | 27          | 42     | 20       | 26              | 27    | 28   |
|                                                    | IN-Cartoon | 20.0 | 13     | 12         | 10      | 13      | 11    | 16          | 14   | 14   | 16    | 21          | 50     | 23       | 25              | 34    | 29   |
|                                                    | IN-Drawing | 15.1 | 16     | 15         | 11      | 4       | 9     | 9           | 8    | 14   | 24    | 8           | 41     | 6        | 18              | 19    | 22   |
| Linear Probing                                     | IN-V2      | 29.8 | 23     | 22         | 18      | 25      | 23    | 27          | 26   | 23   | 27    | 28          | 56     | 25       | 39              | 41    | 45   |
|                                                    | IN-A       | 28.7 | 23     | 21         | 18      | 23      | 21    | 25          | 23   | 23   | 28    | 30          | 53     | 26       | 36              | 39    | 42   |
|                                                    | IN-R       | 25.9 | 19     | 18         | 15      | 19      | 19    | 22          | 22   | 20   | 24    | 23          | 53     | 22       | 36              | 36    | 39   |
|                                                    | IN-Sketch  | 1.7  | 0      | 0          | 0       | 1       | 1     | 1           | 1    | 3    | 2     | 4           | 2      | 3        | 2               | 3     | 2    |
|                                                    | ObjNet     | 25.0 | 16     | 15         | 13      | 21      | 16    | 25          | 25   | 18   | 21    | 34          | 49     | 27       | 33              | 30    | 33   |
|                                                    | IN-Cartoon | 21.8 | 13     | 12         | 10      | 17      | 15    | 20          | 19   | 15   | 17    | 21          | 49     | 22       | 31              | 32    | 34   |
|                                                    | IN-Drawing | 11.4 | 14     | 13         | 9       | 3       | 6     | 5           | 5    | 10   | 19    | 7           | 32     | 7        | 12              | 14    | 16   |
| Visual Prompt (Bahng et al., 2022)                 | IN-V2      | 21.4 | 18     | 16         | 14      | 13      | 13    | 18          | 20   | 17   | 19    | 17          | 45     | 15       | 29              | 32    | 35   |
|                                                    | IN-A       | 7.3  | 5      | 5          | 4       | 3       | 3     | 5           | 7    | 6    | 6     | 5           | 22     | 4        | 11              | 12    | 13   |
|                                                    | IN-R       | 16.6 | 13     | 12         | 10      | 9       | 9     | 13          | 15   | 14   | 15    | 13          | 38     | 12       | 23              | 25    | 27   |
|                                                    | IN-Sketch  | 17.1 | 13     | 12         | 10      | 9       | 9     | 13          | 16   | 15   | 17    | 15          | 40     | 14       | 22              | 25    | 27   |
|                                                    | ObjNet     | 12.9 | 8      | 8          | 6       | 7       | 7     | 10          | 14   | 11   | 11    | 12          | 31     | 10       | 19              | 18    | 21   |
|                                                    | IN-Cartoon | 17.8 | 12     | 11         | 10      | 11      | 10    | 14          | 16   | 13   | 14    | 16          | 41     | 15       | 24              | 29    | 30   |
|                                                    | IN-Drawing | 17.3 | 14     | 13         | 10      | 8       | 9     | 12          | 14   | 16   | 18    | 14          | 40     | 13       | 23              | 26    | 29   |
| EWC (Kirkpatrick et al., 2017)                     | IN-V2      | 31.5 | 25     | 23         | 19      | 27      | 23    | 29          | 28   | 25   | 29    | 31          | 58     | 26       | 40              | 43    | 47   |
|                                                    | IN-A       | 22.0 | 18     | 17         | 14      | 16      | 14    | 18          | 16   | 17   | 20    | 24          | 42     | 18       | 27              | 33    | 35   |
|                                                    | IN-R       | 29.0 | 23     | 22         | 19      | 23      | 23    | 26          | 26   | 22   | 27    | 27          | 54     | 24       | 37              | 38    | 42   |
|                                                    | IN-Sketch  | 13.3 | 6      | 6          | 3       | 9       | 10    | 10          | 10   | 17   | 15    | 21          | 18     | 17       | 17              | 20    | 19   |
|                                                    | ObjNet     | 24.9 | 17     | 17         | 13      | 21      | 16    | 25          | 26   | 19   | 20    | 32          | 49     | 23       | 33              | 30    | 34   |
|                                                    | IN-Cartoon | 20.7 | 12     | 11         | 9       | 16      | 13    | 19          | 17   | 14   | 16    | 20          | 47     | 22       | 28              | 33    | 33   |
|                                                    | IN-Drawing | 12.0 | 16     | 15         | 11      | 3       | 6     | 6           | 5    | 12   | 21    | 6           | 34     | 5        | 12              | 14    | 17   |
| LwF (Li & Hoiem, 2017)                             | IN-V2      | 31.0 | 22     | 20         | 16      | 27      | 23    | 28          | 27   | 26   | 29    | 33          | 57     | 29       | 39              | 43    | 47   |
|                                                    | IN-A       | 26.7 | 19     | 18         | 15      | 22      | 19    | 23          | 21   | 22   | 25    | 31          | 50     | 26       | 32              | 37    | 39   |
|                                                    | IN-R       | 30.3 | 24     | 23         | 20      | 25      | 24    | 27          | 26   | 24   | 29    | 32          | 53     | 28       | 36              | 41    | 43   |
|                                                    | IN-Sketch  | 21.8 | 17     | 16         | 13      | 14      | 14    | 17          | 15   | 18   | 23    | 24          | 41     | 21       | 25              | 32    | 36   |
|                                                    | ObjNet     | 25.6 | 17     | 16         | 13      | 22      | 17    | 25          | 25   | 20   | 22    | 32          | 49     | 25       | 31              | 33    | 35   |
|                                                    | IN-Cartoon | 29.0 | 19     | 18         | 14      | 22      | 20    | 25          | 24   | 21   | 25    | 31          | 61     | 31       | 37              | 44    | 43   |
|                                                    | IN-Drawing | 20.8 | 20     | 18         | 14      | 9       | 13    | 15          | 14   | 19   | 29    | 14          | 52     | 10       | 25              | 28    | 32   |
| LP-FT (Kumar et al., 2022)                         | IN-V2      | 29.8 | 21     | 20         | 16      | 26      | 22    | 27          | 26   | 25   | 28    | 31          | 56     | 27       | 37              | 41    | 46   |
|                                                    | IN-A       | 22.6 | 15     | 14         | 12      | 19      | 17    | 20          | 17   | 18   | 21    | 26          | 44     | 22       | 28              | 31    | 34   |
|                                                    | IN-R       | 27.5 | 23     | 22         | 18      | 22      | 23    | 23          | 22   | 23   | 28    | 29          | 48     | 24       | 32              | 37    | 39   |
|                                                    | IN-Sketch  | 17.5 | 13     | 12         | 11      | 11      | 12    | 12          | 11   | 17   | 19    | 20          | 32     | 17       | 20              | 26    | 29   |
|                                                    | ObjNet     | 22.2 | 15     | 15         | 11      | 18      | 14    | 22          | 23   | 17   | 19    | 29          | 44     | 21       | 28              | 28    | 30   |
|                                                    | IN-Cartoon | 19.7 | 13     | 12         | 10      | 13      | 10    | 16          | 14   | 14   | 16    | 20          | 49     | 22       | 25              | 32    | 28   |
|                                                    | IN-Drawing | 14.5 | 16     | 15         | 12      | 4       | 8     | 8           | 8    | 13   | 24    | 8           | 40     | 6        | 17              | 18    | 21   |
| WiSE-FT (Wortsman et al., 2022b)                   | IN-V2      | 32.3 | 23     | 21         | 18      | 29      | 24    | 30          | 29   | 26   | 30    | 34          | 59     | 30       | 40              | 44    | 48   |
|                                                    | IN-A       | 30.7 | 22     | 21         | 18      | 27      | 22    | 27          | 26   | 24   | 28    | 35          | 56     | 31       | 37              | 42    | 45   |
|                                                    | IN-R       | 33.6 | 27     | 26         | 22      | 29      | 26    | 30          | 29   | 27   | 33    | 36          | 57     | 31       | 39              | 44    | 47   |
|                                                    | IN-Sketch  | 29.8 | 24     | 22         | 19      | 22      | 21    | 25          | 23   | 24   | 30    | 32          | 55     | 29       | 35              | 42    | 46   |
|                                                    | ObjNet     | 30.4 | 22     | 21         | 18      | 26      | 20    | 29          | 30   | 23   | 26    | 36          | 56     | 30       | 37              | 39    | 43   |
|                                                    | IN-Cartoon | 28.8 | 19     | 17         | 15      | 22      | 18    | 25          | 23   | 22   | 25    | 32          | 60     | 31       | 37              | 43    | 43   |
|                                                    | IN-Drawing | 28.8 | 25     | 23         | 19      | 18      | 20    | 23          | 23   | 24   | 32    | 28          | 59     | 23       | 35              | 40    | 42   |
| Model Soup PRE-FT-EWC-LwF (Wortsman et al., 2022a) | IN-V2      | 32.2 | 23     | 22         | 18      | 29      | 24    | 29          | 29   | 26   | 29    | 34          | 59     | 29       | 40              | 44    | 48   |
|                                                    | IN-A       | 29.2 | 22     | 20         | 17      | 25      | 20    | 26          | 23   | 23   | 26    | 33          | 54     | 28       | 35              | 41    | 43   |
|                                                    | IN-R       | 32.9 | 27     | 26         | 22      | 28      | 26    | 29          | 28   | 26   | 32    | 34          | 57     | 30       | 39              | 43    | 47   |
|                                                    | IN-Sketch  | 28.2 | 22     | 21         | 17      | 21      | 20    | 23          | 22   | 24   | 29    | 30          | 52     | 27       | 33              | 40    | 43   |
|                                                    | ObjNet     | 29.3 | 21     | 20         | 17      | 26      | 19    | 29          | 29   | 23   | 25    | 36          | 54     | 29       | 36              | 37    | 40   |
|                                                    | IN-Cartoon | 27.5 | 18     | 17         | 14      | 22      | 18    | 24          | 22   | 20   | 23    | 29          | 58     | 29       | 36              | 42    | 41   |
|                                                    | IN-Drawing | 24.2 | 25     | 23         | 18      | 12      | 15    | 17          | 17   | 21   | 31    | 19          | 53     | 15       | 29              | 32    | 36   |

Table S35: Accuracy of ImageNet-1K pretrained ResNet-50 with different fine-tuning methods and downstream datasets on each ImageNet-C corruption For each corruption, accuracy is averaged across 5 levels of severity.

| Dataset                                            | Method     | Avg. | Gauss. | Noise Shot | Impulse | Defocus | Glass | Blur Motion | Zoom | Snow | Frost | Weather Fog | Bright | Contrast | Digital Elastic | Pixel | JPEG |
|----------------------------------------------------|------------|------|--------|------------|---------|---------|-------|-------------|------|------|-------|-------------|--------|----------|-----------------|-------|------|
| Pretrained                                         |            | 46.6 | 41     | 39         | 36      | 41      | 27    | 42          | 43   | 40   | 45    | 58          | 71     | 57       | 47              | 50    | 59   |
| FT                                                 | IN-V2      | 47.0 | 41     | 40         | 36      | 40      | 28    | 43          | 42   | 42   | 48    | 59          | 72     | 55       | 47              | 51    | 62   |
|                                                    | IN-A       | 46.3 | 43     | 42         | 40      | 40      | 27    | 41          | 39   | 44   | 47    | 58          | 68     | 56       | 44              | 48    | 58   |
|                                                    | IN-R       | 43.7 | 40     | 39         | 36      | 34      | 33    | 38          | 36   | 39   | 48    | 52          | 65     | 48       | 45              | 48    | 55   |
|                                                    | IN-Sketch  | 23.3 | 20     | 19         | 16      | 13      | 11    | 17          | 16   | 26   | 28    | 33          | 41     | 23       | 22              | 29    | 35   |
|                                                    | ObjNet     | 41.8 | 35     | 34         | 31      | 38      | 24    | 41          | 40   | 35   | 40    | 55          | 65     | 52       | 41              | 43    | 52   |
|                                                    | IN-Cartoon | 31.9 | 28     | 26         | 24      | 26      | 15    | 27          | 24   | 24   | 28    | 36          | 62     | 42       | 33              | 41    | 43   |
|                                                    | IN-Drawing | 16.3 | 24     | 18         | 20      | 2       | 4     | 5           | 5    | 24   | 37    | 8           | 49     | 7        | 12              | 11    | 17   |
| Linear Probing                                     | IN-V2      | 45.6 | 42     | 40         | 38      | 36      | 28    | 42          | 40   | 40   | 47    | 52          | 70     | 57       | 46              | 49    | 57   |
|                                                    | IN-A       | 45.4 | 45     | 44         | 42      | 35      | 28    | 39          | 37   | 41   | 48    | 53          | 67     | 54       | 44              | 47    | 55   |
|                                                    | IN-R       | 40.6 | 35     | 32         | 30      | 33      | 27    | 36          | 37   | 35   | 39    | 47          | 67     | 50       | 47              | 43    | 51   |
|                                                    | IN-Sketch  | 2.8  | 1      | 1          | 0       | 1       | 1     | 2           | 2    | 5    | 4     | 8           | 3      | 4        | 2               | 3     | 4    |
|                                                    | ObjNet     | 39.4 | 32     | 30         | 29      | 36      | 23    | 39          | 38   | 33   | 38    | 53          | 64     | 51       | 39              | 39    | 48   |
|                                                    | IN-Cartoon | 35.6 | 30     | 25         | 25      | 29      | 22    | 31          | 29   | 29   | 34    | 41          | 65     | 44       | 41              | 44    | 47   |
|                                                    | IN-Drawing | 8.8  | 17     | 9          | 15      | 0       | 0     | 0           | 0    | 21   | 32    | 1           | 29     | 1        | 1               | 2     | 3    |
| Visual Prompt (Bahng et al., 2022)                 | IN-V2      | 36.4 | 31     | 30         | 26      | 28      | 20    | 32          | 36   | 31   | 34    | 44          | 63     | 42       | 40              | 40    | 49   |
|                                                    | IN-A       | 32.8 | 27     | 26         | 23      | 22      | 16    | 28          | 31   | 29   | 31    | 42          | 59     | 39       | 37              | 38    | 46   |
|                                                    | IN-R       | 32.8 | 26     | 25         | 22      | 24      | 17    | 29          | 32   | 28   | 31    | 41          | 59     | 40       | 37              | 37    | 45   |
|                                                    | IN-Sketch  | 33.0 | 27     | 26         | 22      | 24      | 16    | 29          | 33   | 28   | 31    | 41          | 59     | 40       | 36              | 37    | 45   |
|                                                    | ObjNet     | 33.1 | 27     | 25         | 22      | 24      | 17    | 29          | 34   | 28   | 31    | 42          | 59     | 39       | 37              | 36    | 45   |
|                                                    | IN-Cartoon | 34.5 | 29     | 27         | 23      | 26      | 18    | 30          | 34   | 30   | 32    | 43          | 61     | 41       | 39              | 39    | 47   |
|                                                    | IN-Drawing | 35.1 | 30     | 29         | 25      | 24      | 18    | 29          | 33   | 31   | 36    | 43          | 61     | 41       | 39              | 40    | 48   |
| EWC (Kirkpatrick et al., 2017)                     | IN-V2      | 46.0 | 41     | 39         | 36      | 38      | 28    | 43          | 41   | 40   | 46    | 56          | 71     | 54       | 47              | 50    | 59   |
|                                                    | IN-A       | 46.8 | 44     | 43         | 41      | 38      | 29    | 42          | 40   | 43   | 48    | 58          | 70     | 53       | 46              | 49    | 58   |
|                                                    | IN-R       | 42.9 | 37     | 35         | 33      | 34      | 28    | 39          | 39   | 38   | 42    | 50          | 68     | 50       | 47              | 47    | 54   |
|                                                    | IN-Sketch  | 13.2 | 6      | 5          | 3       | 7       | 8     | 10          | 10   | 24   | 22    | 21          | 21     | 12       | 15              | 17    | 18   |
|                                                    | ObjNet     | 41.3 | 34     | 33         | 30      | 37      | 24    | 40          | 40   | 35   | 38    | 55          | 66     | 53       | 42              | 41    | 51   |
|                                                    | IN-Cartoon | 33.1 | 25     | 22         | 21      | 28      | 19    | 30          | 27   | 25   | 30    | 40          | 63     | 42       | 38              | 43    | 46   |
|                                                    | IN-Drawing | 7.5  | 10     | 7          | 10      | 0       | 0     | 0           | 0    | 21   | 31    | 0           | 26     | 0        | 1               | 1     | 2    |
| LwF (Li & Hoiem, 2017)                             | IN-V2      | 47.5 | 42     | 41         | 37      | 41      | 28    | 43          | 42   | 43   | 48    | 59          | 72     | 56       | 47              | 52    | 63   |
|                                                    | IN-A       | 46.8 | 43     | 42         | 40      | 40      | 28    | 42          | 40   | 44   | 47    | 59          | 69     | 57       | 44              | 49    | 58   |
|                                                    | IN-R       | 44.9 | 41     | 41         | 37      | 36      | 34    | 39          | 37   | 40   | 48    | 53          | 66     | 50       | 46              | 49    | 56   |
|                                                    | IN-Sketch  | 21.4 | 18     | 17         | 14      | 13      | 10    | 15          | 15   | 26   | 27    | 32          | 36     | 19       | 20              | 27    | 32   |
|                                                    | ObjNet     | 43.1 | 37     | 36         | 32      | 39      | 25    | 42          | 41   | 37   | 41    | 56          | 67     | 54       | 42              | 45    | 54   |
|                                                    | IN-Cartoon | 34.6 | 30     | 28         | 25      | 28      | 17    | 30          | 27   | 27   | 31    | 39          | 65     | 44       | 36              | 44    | 47   |
|                                                    | IN-Drawing | 12.3 | 20     | 13         | 18      | 1       | 2     | 2           | 2    | 25   | 38    | 4           | 42     | 4        | 5               | 5     | 7    |
| LP-FT (Kumar et al., 2022)                         | IN-V2      | 47.1 | 42     | 40         | 37      | 40      | 28    | 43          | 42   | 42   | 48    | 59          | 71     | 55       | 47              | 51    | 62   |
|                                                    | IN-A       | 46.4 | 43     | 42         | 39      | 39      | 28    | 42          | 40   | 44   | 48    | 58          | 69     | 56       | 45              | 48    | 58   |
|                                                    | IN-R       | 44.2 | 40     | 40         | 36      | 35      | 34    | 38          | 37   | 40   | 48    | 52          | 66     | 48       | 46              | 49    | 55   |
|                                                    | IN-Sketch  | 24.2 | 21     | 19         | 17      | 15      | 13    | 18          | 19   | 27   | 29    | 32          | 41     | 23       | 23              | 30    | 35   |
|                                                    | ObjNet     | 41.8 | 35     | 34         | 31      | 38      | 24    | 41          | 40   | 35   | 40    | 55          | 66     | 52       | 41              | 43    | 52   |
|                                                    | IN-Cartoon | 32.2 | 29     | 27         | 25      | 26      | 15    | 28          | 24   | 24   | 28    | 36          | 62     | 42       | 33              | 41    | 43   |
|                                                    | IN-Drawing | 16.7 | 26     | 21         | 22      | 1       | 4     | 6           | 5    | 23   | 37    | 7           | 48     | 5        | 14              | 13    | 19   |
| WiSE-FT (Wortsman et al., 2022b)                   | IN-V2      | 48.1 | 42     | 40         | 37      | 42      | 28    | 43          | 43   | 42   | 48    | 60          | 73     | 59       | 48              | 53    | 63   |
|                                                    | IN-A       | 48.9 | 44     | 43         | 40      | 43      | 29    | 43          | 44   | 45   | 48    | 61          | 72     | 60       | 48              | 52    | 61   |
|                                                    | IN-R       | 49.3 | 45     | 44         | 41      | 43      | 34    | 43          | 43   | 43   | 50    | 59          | 72     | 57       | 50              | 53    | 62   |
|                                                    | IN-Sketch  | 41.5 | 40     | 40         | 37      | 33      | 26    | 37          | 37   | 36   | 40    | 48          | 66     | 41       | 42              | 47    | 55   |
|                                                    | ObjNet     | 46.8 | 41     | 40         | 36      | 43      | 27    | 44          | 44   | 40   | 45    | 59          | 71     | 58       | 46              | 50    | 59   |
|                                                    | IN-Cartoon | 42.8 | 37     | 35         | 32      | 37      | 22    | 38          | 35   | 37   | 40    | 51          | 72     | 53       | 46              | 50    | 57   |
|                                                    | IN-Drawing | 41.8 | 42     | 39         | 38      | 25      | 22    | 34          | 32   | 39   | 48    | 50          | 71     | 48       | 42              | 45    | 53   |
| Model Soup PRE-FT-EWC-LwF (Wortsman et al., 2022a) | IN-V2      | 48.0 | 42     | 40         | 37      | 42      | 28    | 43          | 43   | 43   | 48    | 60          | 73     | 59       | 48              | 52    | 63   |
|                                                    | IN-A       | 48.9 | 45     | 44         | 41      | 42      | 29    | 44          | 43   | 45   | 49    | 61          | 71     | 60       | 47              | 51    | 61   |
|                                                    | IN-R       | 48.4 | 44     | 43         | 40      | 41      | 34    | 42          | 42   | 43   | 49    | 58          | 71     | 55       | 50              | 52    | 60   |
|                                                    | IN-Sketch  | 38.7 | 36     | 35         | 33      | 29      | 22    | 32          | 33   | 37   | 40    | 46          | 63     | 37       | 39              | 45    | 52   |
|                                                    | ObjNet     | 45.7 | 39     | 38         | 35      | 41      | 26    | 44          | 44   | 39   | 44    | 59          | 70     | 57       | 45              | 48    | 57   |
|                                                    | IN-Cartoon | 39.5 | 34     | 31         | 29      | 34      | 21    | 35          | 32   | 32   | 36    | 46          | 69     | 49       | 43              | 48    | 53   |
|                                                    | IN-Drawing | 28.9 | 38     | 32         | 34      | 6       | 11    | 14          | 13   | 35   | 46    | 29          | 64     | 24       | 26              | 26    | 35   |

## REFERENCES

- Hyojin Bahng, Ali Jahanian, Swami Sankaranarayanan, and Phillip Isola. Exploring visual prompts for adapting large-scale models. *arXiv preprint arXiv:2203.17274*, 2022.
- Dan Hendrycks and Thomas Dietterich. Benchmarking neural network robustness to common corruptions and perturbations. *ICLR*, 2019.
- Edward J Hu, Yelong Shen, Phillip Wallis, Zeyuan Allen-Zhu, Yuanzhi Li, Shean Wang, Lu Wang, and Weizhu Chen. Lora: Low-rank adaptation of large language models. In *ICLR*, 2021.
- James Kirkpatrick, Razvan Pascanu, Neil Rabinowitz, Joel Veness, Guillaume Desjardins, Andrei A Rusu, Kieran Milan, John Quan, Tiago Ramalho, Agnieszka Grabska-Barwinska, et al. Overcoming catastrophic forgetting in neural networks. *PNAS*, 114(13):3521–3526, 2017.
- Ananya Kumar, Aditi Raghunathan, Robbie Jones, Tengyu Ma, and Percy Liang. Fine-tuning can distort pretrained features and underperform out-of-distribution. In *ICLR*, 2022.
- Zhizhong Li and Derek Hoiem. Learning without forgetting. *TPAMI*, 40(12):2935–2947, 2017.
- Mitchell Wortsman, Gabriel Ilharco, Samir Ya Gadre, Rebecca Roelofs, Raphael Gontijo-Lopes, Ari S Morcos, Hongseok Namkoong, Ali Farhadi, Yair Carmon, Simon Kornblith, and Ludwig Schmidt. Model soups: averaging weights of multiple fine-tuned models improves accuracy without increasing inference time. In *ICML*, 2022a.
- Mitchell Wortsman, Gabriel Ilharco, Jong Wook Kim, Mike Li, Simon Kornblith, Rebecca Roelofs, Raphael Gontijo Lopes, Hannaneh Hajishirzi, Ali Farhadi, Hongseok Namkoong, and Ludwig Schmidt. Robust fine-tuning of zero-shot models. In *CVPR*, 2022b.
